# Supplementary material for: The Activation-Induced Assembly of an RNA/Protein Interactome Centered on the Splicing Factor U2AF2 Regulates Gene Expression in Human CD4 T Cells
Source: PLoS One. 2015 Dec 7;10(12):e0144409. doi: 10.1371/journal.pone.0144409 (PMC4671683; doi:10.1371/journal.pone.0144409)
Supplement: S8 Table — (XLSX) [file pone.0144409.s017.xlsx]

## Sheet: U2AF2RIP_U2AF1vCtrl_DEGene
	logFC	AveExpr	t	P.Value	adj.P.Val	B	Sym	Chr	GenomicPos	Len
TC12001791.hg.1	-1.16235	9.49801	-4.93692	0.000912312	0.0193693	-0.402441	CEP290	chr12	88442790 - 88535993	93203
TC0X001173.hg.1	-1.13548	10.1275	-4.91889	0.000934505	0.0194505	-0.426838	ATRX	chrX	76760356 - 77041719	281363
TC07001605.hg.1	-1.06446	8.03974	-4.07182	0.00304926	0.0339222	-1.6289	SAMD9	chr7	92728826 - 92747336	18510
TC06001915.hg.1	-1.0483	8.20192	-5.75388	0.000322194	0.012468	0.650202	KIAA1009	chr6	84833960 - 84937353	103393
TC08000528.hg.1	-1.01515	8.9826	-4.55251	0.0015387	0.0243087	-0.933515	LRRCC1	chr8	86019323 - 86058315	38992
TC18000401.hg.1	-1.01453	8.67862	-5.7424	0.000326733	0.012468	0.636118	ESCO1	chr18	19109242 - 19180845	71603
TC13000141.hg.1	-1.01266	10.0976	-4.73005	0.00120544	0.0217699	-0.685403	WBP4	chr13	41635410 - 41658139	22729
TC07000545.hg.1	-1.00373	9.80616	-4.41766	0.00185786	0.0264428	-1.12517	AKAP9	chr7	91570181 - 91739987	169806
TC20000637.hg.1	-0.982358	9.78705	-5.3677	0.000520893	0.0152238	0.165451	ESF1	chr20	13694969 - 13765565	70596
TC03001536.hg.1	-0.924938	10.0449	-5.00171	0.000837146	0.0186346	-0.315186	TMF1	chr3	69068978 - 69101484	32506
TC01003679.hg.1	-0.887896	10.119	-4.58382	0.00147338	0.0238395	-0.889414	KIF14	chr1	200520625 - 200589862	69237
TC09000607.hg.1	-0.88519	10.9485	-5.29611	0.000570697	0.0159879	0.0730711	CNTRL	chr9	123837141 - 123939888	102747
TC02000666.hg.1	-0.869461	9.21668	-5.55328	0.00041246	0.0138524	0.401253	GCC2	chr2	109065017 - 109125871	60854
TC17002856.hg.1	-0.859326	7.57493	-5.49655	0.000442741	0.0142846	0.32973	CEP112	chr17	63631656 - 64188212	556556
TC07001606.hg.1	-0.859303	8.58033	-4.49273	0.00167223	0.0251733	-1.01813	SAMD9L	chr7	92759368 - 92777682	18314
TC04001436.hg.1	-0.850965	10.8789	-4.29451	0.00221194	0.0285786	-1.30256	CENPE	chr4	104026963 - 104119566	92603
TC10000644.hg.1	-0.846723	10.3014	-4.5635	0.00151541	0.0241415	-0.918012	KIF20B	chr10	91461367 - 91534700	73333
TC12001811.hg.1	-0.841761	10.4111	-3.95426	0.00362277	0.0367886	-1.80397	EEA1	chr12	93164413 - 93323107	158694
TC06000640.hg.1	-0.837698	9.8834	-7.85446	3.26076e-05	0.0060884	2.9159	CENPQ	chr6	49431096 - 49460820	29724
TC03000333.hg.1	-0.832405	9.43586	-7.39885	5.13992e-05	0.00720593	2.4736	DNAH1	chr3	52350335 - 52434513	84178
TC04000408.hg.1	-0.825504	10.7826	-4.63279	0.00137711	0.0233523	-0.820722	IL8	chr4	74606223 - 74609433	3210
TC11002259.hg.1	-0.812019	9.55229	-4.4862	0.00168758	0.0252693	-1.02742	CWF19L2	chr11	107197071 - 107328572	131501
TC14000326.hg.1	-0.804037	11.0541	-4.48293	0.0016953	0.0253215	-1.03207	KTN1	chr14	56046925 - 56151302	104377
TC03001247.hg.1	-0.801023	11.3471	-4.06463	0.0030814	0.0340645	-1.63956	TOP2B	chr3	25639475 - 25706430	66955
TC01001791.hg.1	-0.79314	11.2409	-4.79081	0.00111	0.0212137	-0.601603	CENPF	chr1	214776532 - 214837931	61399
TC0X001184.hg.1	-0.791658	8.49627	-3.5666	0.0064814	0.0498629	-2.39357	HMGN5	chrX	80369200 - 80457441	88241
TC12001888.hg.1	-0.787209	9.23967	-4.3886	0.00193553	0.0269714	-1.16682	PMCH	chr12	102590237 - 102591623	1386
TC11001116.hg.1	-0.775894	8.62281	-3.75078	0.00490405	0.0433459	-2.11122	CRTAM	chr11	122709206 - 122743347	34141
TC03001699.hg.1	-0.769965	10.8868	-3.70553	0.00524971	0.0446653	-2.18024	IQCB1	chr3	121488610 - 121553926	65316
TC15001449.hg.1	-0.768072	10.6291	-4.54787	0.00154864	0.0243359	-0.94006	LEO1	chr15	52230222 - 52264003	33781
TC04001047.hg.1	-0.760381	10.7684	-3.82719	0.00437403	0.0404879	-1.99524	BOD1L1	chr4	13570362 - 13629347	58985
TC02001576.hg.1	-0.757621	9.92732	-3.61695	0.00600308	0.0476183	-2.31602	ROCK2	chr2	11319887 - 11488456	168569
TC06002060.hg.1	-0.744638	8.60645	-5.81044	0.000300815	0.0122708	0.719293	FAM184A	chr6	119280928 - 119470552	189624
TC0X000661.hg.1	-0.744534	10.879	-3.88182	0.00403249	0.038829	-1.91274	HTATSF1	chrX	135579238 - 135594505	15267
TC14000348.hg.1	-0.723528	9.52467	-3.78985	0.00462502	0.041967	-2.05182	ARID4A	chr14	58765103 - 58840605	75502
TC03000178.hg.1	-0.71667	10.5468	-4.96896	0.00087426	0.0189381	-0.359202	GOLGA4	chr3	37284668 - 37408370	123702
TC09001333.hg.1	-0.712073	10.83	-5.02239	0.000814583	0.0184136	-0.287469	NOL8	chr9	95059640 - 95087876	28236
TC0X000061.hg.1	-0.707516	9.60546	-3.69159	0.00536126	0.0450472	-2.20154	OFD1	chrX	13752832 - 13787480	34648
TC03000242.hg.1	-0.700547	11.3451	-4.01014	0.00333701	0.0353914	-1.72052	KIF15	chr3	44803209 - 44914868	111659
TC01006365.hg.1	-0.697683	10.8925	-6.77277	9.95506e-05	0.00840586	1.82338	BCAS2	chr1	115110178 - 115124265	14087
TC02001894.hg.1	-0.696429	8.54777	-5.58993	0.000394101	0.0136005	0.447193	FAM161A	chr2	62051983 - 62081278	29295
TC02001141.hg.1	-0.692891	9.31955	-5.37634	0.000515206	0.0150961	0.17655	CCDC150	chr2	197504278 - 197628214	123936
TC03001998.hg.1	-0.692713	10.4861	-4.02006	0.00328886	0.0352387	-1.70576	TNIK	chr3	170779128 - 171178197	399069
TC01003636.hg.1	-0.67947	11.8614	-4.13666	0.00277512	0.0322295	-1.53317	TPR	chr1	186280786 - 186344864	64078
TC04000324.hg.1	-0.675288	9.09478	-4.57623	0.00148893	0.0239521	-0.900085	EXOC1	chr4	56719782 - 56771244	51462
TC15001337.hg.1	-0.673903	10.8632	-3.84305	0.00427183	0.0398687	-1.97125	CEP152	chr15	49030132 - 49103343	73211
TC12000512.hg.1	-0.669296	9.93898	-4.96309	0.00088111	0.0189381	-0.367123	IL23A	chr12	56732663 - 56734194	1531
TC01002834.hg.1	-0.668054	7.80374	-4.99902	0.000840124	0.0186647	-0.318789	ODF2L	chr1	86786611 - 86862025	75414
TC13000612.hg.1	-0.660765	9.04341	-7.014	7.67726e-05	0.00776073	2.07995	EPSTI1	chr13	43460524 - 43566385	105861
TC03001882.hg.1	-0.659508	8.99392	-4.82631	0.00105805	0.0207256	-0.552915	HLTF	chr3	148747904 - 148804341	56437
TC11002246.hg.1	-0.659318	8.22743	-7.34434	5.43527e-05	0.00720593	2.41898	CASP4	chr11	104813593 - 104840163	26570
TC15001456.hg.1	-0.658077	10.6008	-4.20358	0.00251958	0.0306892	-1.43497	MYO5A	chr15	52599480 - 52821247	221767
TC02001741.hg.1	-0.654658	10.3277	-4.7393	0.00119036	0.0217369	-0.672617	CEBPZ	chr2	37428755 - 37458856	30101
TC01000860.hg.1	-0.653363	9.16199	-4.31679	0.00214288	0.0282693	-1.27031	CCDC18	chr1	93645476 - 93744287	98811
TC18000100.hg.1	-0.65312	11.0723	-3.61878	0.00598641	0.0476005	-2.3132	RIOK3	chr18	21032787 - 21063104	30317
TC15002007.hg.1	-0.651943	11.3373	-4.21542	0.00247705	0.0303644	-1.41766	SNRPA1	chr15	101821715 - 101835487	13772
TC09000324.hg.1	-0.651467	11.0874	-4.42317	0.00184351	0.0263196	-1.11729	SMC5	chr9	72873878 - 72969804	95926
TC11002126.hg.1	-0.650609	10.2461	-4.63089	0.00138073	0.0233523	-0.823391	RSF1	chr11	77371041 - 77532063	161022
TC13000128.hg.1	-0.64517	10.1337	-7.39255	5.17318e-05	0.00720593	2.46729	EXOSC8	chr13	37572953 - 37583751	10798
TC08000246.hg.1	-0.63514	11.1605	-3.60993	0.00606744	0.0479049	-2.32681	WRN	chr8	30890778 - 31031285	140507
TC06002269.hg.1	-0.634144	8.90744	-7.31458	5.60434e-05	0.00720593	2.389	RSPH3	chr6	159397312 - 159421219	23907
TC05001605.hg.1	-0.633954	9.82782	-6.54772	0.000127626	0.00899757	1.57694	TTC37	chr5	94799599 - 94890711	91112
TC03000088.hg.1	-0.631546	10.1613	-4.74759	0.00117702	0.0216946	-0.661163	C3orf19	chr3	14693253 - 14714166	20913
TC06000978.hg.1	-0.62925	8.88958	-3.63841	0.00581062	0.0469919	-2.28304	L3MBTL3	chr6	130334844 - 130462594	127750
TC02001217.hg.1	-0.628019	8.11841	-4.50315	0.0016481	0.0249445	-1.00335	ZDBF2	chr2	207139387 - 207179148	39761
TC19001794.hg.1	-0.626704	8.85183	-7.22801	6.12995e-05	0.00729377	2.30118	ZNF432	chr19	52536361 - 52552106	15745
TC12001391.hg.1	-0.625157	10.1695	-3.69851	0.00530556	0.0447757	-2.19096	KIF21A	chr12	39687030 - 39837192	150162
TC08000663.hg.1	-0.623982	9.15457	-5.13533	0.000702444	0.0172773	-0.13729	EMC2	chr8	109455830 - 109499145	43315
TC13000271.hg.1	-0.622721	10.2005	-4.43484	0.00181351	0.026071	-1.1006	PIBF1	chr13	73356197 - 73590592	234395
TC02002281.hg.1	-0.621108	10.3139	-4.02286	0.00327538	0.035178	-1.70159	IWS1	chr2	128193783 - 128284462	90679
TC11000194.hg.1	-0.621031	10.2639	-3.82887	0.00436308	0.0404879	-1.99269	USP47	chr11	11862970 - 11980872	117902
TC09001674.hg.1	-0.618358	9.69101	-5.09528	0.000740172	0.0175371	-0.190322	TTF1	chr9	135250937 - 135282238	31301
TC12000219.hg.1	-0.61395	9.09953	-4.01769	0.00330029	0.0352735	-1.70928	PLEKHA5	chr12	19282626 - 19529334	246708
TC05001628.hg.1	-0.611113	10.8626	-3.82854	0.0043652	0.0404879	-1.99319	CHD1	chr5	98190908 - 98262240	71332
TC16000920.hg.1	-0.609647	10.6469	-4.5788	0.00148364	0.0239227	-0.896466	C16orf88	chr16	19717674 - 19729492	11818
TC04000327.hg.1	-0.608964	9.35053	-3.7326	0.00503994	0.0438551	-2.13892	CEP135	chr4	56815037 - 56899527	84490
TC16000601.hg.1	-0.597017	10.9141	-9.25681	9.06082e-06	0.00465858	4.1321	DHX38	chr16	72127615 - 72146811	19196
TC07001534.hg.1	-0.59601	8.7016	-5.87916	0.000276895	0.0119299	0.802596	HIP1	chr7	75162619 - 75368283	205664
TC06004137.hg.1	-0.59437	8.4158	-9.3253	8.54713e-06	0.00465858	4.18639	ARHGAP18	chr6	129897277 - 130031370	134093
TC04001725.hg.1	-0.591691	9.36912	-4.25317	0.0023465	0.0296468	-1.36261	NEK1	chr4	170314421 - 170533780	219359
TC0X000619.hg.1	-0.591542	10.6826	-4.42005	0.00185161	0.0263865	-1.12174	UTP14A	chrX	129040097 - 129063738	23641
TC06001896.hg.1	-0.589838	9.82749	-13.2304	5.0123e-07	0.000983438	6.67019	HMGN3	chr6	79910962 - 79944455	33493
TC0X001257.hg.1	-0.5893	8.75054	-4.32366	0.00212205	0.0281136	-1.26037	MORC4	chrX	106057101 - 106243474	186373
TC02002582.hg.1	-0.588557	11.2788	-4.11383	0.00286849	0.0326213	-1.5668	CWC22	chr2	180809603 - 180871840	62237
TC02000326.hg.1	-0.586285	9.34751	-3.63818	0.00581266	0.0469919	-2.28339	CCDC104	chr2	55746740 - 55773015	26275
TC12000372.hg.1	-0.581233	9.90639	-6.80876	9.5726e-05	0.00824931	1.86215	SPATS2	chr12	49760688 - 49921207	160519
TC20000940.hg.1	-0.580387	11.0378	-3.74827	0.00492254	0.0434257	-2.11503	DPM1	chr20	49551404 - 49575092	23688
TC05000891.hg.1	-0.578331	9.94246	-4.8355	0.00104503	0.0206595	-0.540338	TTC1	chr5	159436120 - 159492550	56430
TC0X000481.hg.1	-0.574694	9.74397	-6.92831	8.41326e-05	0.00785648	1.98969	ARMCX3	chrX	100878118 - 100882833	4715
TC03001474.hg.1	-0.570456	9.18845	-4.24644	0.00236921	0.0297859	-1.3724	SELK	chr3	53918437 - 53926015	7578
TC03001487.hg.1	-0.567995	9.9351	-3.99634	0.00340525	0.0356542	-1.74109	FAM208A	chr3	56654160 - 56717265	63105
TC16001270.hg.1	-0.564469	9.92138	-6.95029	8.21738e-05	0.00778325	2.01293	MLKL	chr16	74705753 - 74734789	29036
TC05000368.hg.1	-0.561237	11.0052	-3.61835	0.00599032	0.0476005	-2.31386	IQGAP2	chr5	75699074 - 76003957	304883
TC05000907.hg.1	-0.560617	10.6938	-4.26914	0.00229352	0.0292379	-1.33939	HMMR	chr5	162887175 - 162918953	31778
TC08000447.hg.1	-0.558168	10.2678	-4.76216	0.00115395	0.0215167	-0.641054	CSPP1	chr8	67974661 - 68108849	134188
TC10000097.hg.1	-0.55702	9.9446	-4.29569	0.00220824	0.0285708	-1.30086	OPTN	chr10	13141449 - 13180291	38842
TC04001667.hg.1	-0.556784	7.91709	-3.73483	0.00502303	0.0437908	-2.13551	MAP9	chr4	156263810 - 156298122	34312
TC01001804.hg.1	-0.555511	10.0671	-4.06882	0.00306263	0.0339222	-1.63335	RRP15	chr1	218458629 - 218511325	52696
TC13000436.hg.1	-0.55495	10.5424	-3.66746	0.00556046	0.046014	-2.23848	UPF3A	chr13	115047059 - 115071291	24232
TC02002217.hg.1	-0.553462	10.1201	-4.52729	0.00159359	0.0245344	-0.969154	CKAP2L	chr2	113493930 - 113522254	28324
TC13000168.hg.1	-0.552601	9.33437	-3.96671	0.00355688	0.0364771	-1.78533	KIAA1704	chr13	45563687 - 45607746	44059
TC02002008.hg.1	-0.549932	9.21259	-5.67417	0.00035519	0.0128428	0.552004	GCFC2	chr2	75879126 - 75938115	58989
TC16001302.hg.1	-0.54827	10.9382	-4.61966	0.00140224	0.0233523	-0.839102	MPHOSPH6	chr16	82181767 - 82203831	22064
TC0X000321.hg.1	-0.547529	10.2607	-5.18508	0.00065846	0.0169267	-0.0717699	TSR2	chrX	54466834 - 54471920	5086
TC02000347.hg.1	-0.546663	9.68374	-5.28177	0.000581277	0.0160881	0.0544801	PAPOLG	chr2	60983365 - 61029221	45856
TC16000125.hg.1	-0.544295	8.99516	-4.98384	0.000857188	0.0187353	-0.339191	CLUAP1	chr16	3550963 - 3587669	36706
TC14001366.hg.1	-0.54389	9.6037	-4.81158	0.00107928	0.0209426	-0.573093	CEP128	chr14	80943330 - 81425828	482498
TC12000251.hg.1	-0.543453	8.79678	-4.7426	0.00118503	0.0217349	-0.668053	LRMP	chr12	25186693 - 25261269	74576
TC05002010.hg.1	-0.543361	10.5375	-4.98781	0.000852689	0.0187353	-0.333851	SLU7	chr5	159828648 - 159848718	20070
TC04000362.hg.1	-0.542281	9.70787	-5.7515	0.000323128	0.012468	0.647287	STAP1	chr4	68424446 - 68473055	48609
TC06002143.hg.1	-0.536333	11.1665	-3.96897	0.00354508	0.0364211	-1.78196	BCLAF1	chr6	136578001 - 136610989	32988
TC01003766.hg.1	-0.534765	9.07156	-5.09303	0.000742358	0.0175447	-0.193312	IL10	chr1	206940947 - 206946034	5087
TC02000428.hg.1	-0.533844	9.67075	-3.95473	0.00362025	0.0367886	-1.80327	MPHOSPH10	chr2	71357444 - 71377232	19788
TC03001812.hg.1	-0.533759	10.0913	-4.20819	0.00250292	0.0305836	-1.42822	STAG1	chr3	136055077 - 136471245	416168
TC01001475.hg.1	-0.533696	8.66456	-4.35987	0.00201578	0.0273607	-1.20813	BLZF1	chr1	169337194 - 169365780	28586
TC03001661.hg.1	-0.532797	10.0362	-4.17889	0.00261079	0.0311423	-1.47112	SPICE1	chr3	113161565 - 113234034	72469
TC12000989.hg.1	-0.531013	10.2	-4.39599	0.00191547	0.026929	-1.15622	DDX55	chr12	124086646 - 124105482	18836
TC09002918.hg.1	-0.526186	9.19269	-3.66973	0.0055414	0.0459556	-2.23501	STRBP	chr9	125883570 - 126030855	147285
TC03001702.hg.1	-0.525887	7.9694	-5.76621	0.000317398	0.012468	0.665298	CCDC58	chr3	122078436 - 122102078	23642
TC14002198.hg.1	-0.525392	9.74003	-4.18418	0.00259095	0.0311	-1.46336	SNAPC1	chr14	62229075 - 62263146	34071
TC09001282.hg.1	-0.523376	7.81289	-3.5632	0.00651519	0.0499481	-2.39883	KIF27	chr9	86451613 - 86536342	84729
TC06002050.hg.1	-0.52142	9.52787	-4.37334	0.00197773	0.027336	-1.18876	ZUFSP	chr6	116956781 - 116989973	33192
TC01002422.hg.1	-0.517433	10.7435	-4.40515	0.00189089	0.0266487	-1.14309	DNAJC8	chr1	28526790 - 28559542	32752
TC15001561.hg.1	-0.516816	9.85293	-5.73657	0.000329066	0.0124741	0.628954	CLPX	chr15	65440557 - 65477762	37205
TC01002707.hg.1	-0.515155	10.5179	-4.21617	0.00247439	0.0303642	-1.41657	MYSM1	chr1	59120411 - 59165764	45353
TC15001750.hg.1	-0.514923	10.2314	-7.28943	5.75176e-05	0.00720593	2.36358	GOLGA6L10	chr15	83009407 - 83018198	8791
TC04000608.hg.1	-0.514662	10.5324	-4.92908	0.000921886	0.0194505	-0.413038	METTL14	chr4	119606523 - 119632201	25678
TC17000184.hg.1	-0.510044	9.67783	-7.10883	6.94423e-05	0.00731756	2.17871	PIGL	chr17	16120509 - 16229573	109064
TC08002600.hg.1	-0.509945	10.4804	-4.36375	0.00200473	0.0273607	-1.20254	HOOK3	chr8	42752033 - 42885682	133649
TC14001155.hg.1	-0.505202	10.3913	-4.74655	0.00117868	0.0216946	-0.662592	DLGAP5	chr14	55614830 - 55658396	43566
TC0X000464.hg.1	-0.504384	10.4306	-5.98997	0.000242584	0.0114339	0.935432	DIAPH2	chrX	95939662 - 96859996	920334
TC15001287.hg.1	-0.50413	10.7855	-4.05571	0.00312176	0.0342796	-1.65278	MFAP1	chr15	44096690 - 44117000	20310
TC02002212.hg.1	-0.503949	9.60541	-7.02646	7.57626e-05	0.00776073	2.093	ZC3H8	chr2	112973254 - 113012713	39459
TC03000480.hg.1	-0.502758	9.37756	-7.2836	5.78651e-05	0.00720593	2.35768	CRYBG3	chr3	97540884 - 97594133	53249
TC05000377.hg.1	-0.502416	10.5957	-3.65669	0.00565183	0.0463692	-2.25499	AGGF1	chr5	76325076 - 76361059	35983
TC15001738.hg.1	-0.501971	9.56333	-7.25508	5.95998e-05	0.00720593	2.32874	GOLGA6L10, GOLGA6L3	chr15	82633123 - 82641706	8583
TC19001102.hg.1	-0.497757	11.0582	-8.59075	1.62977e-05	0.00496971	3.58022	TNFSF14	chr19	6663148 - 6670599	7451
TC04000335.hg.1	-0.494565	10.2727	-4.41078	0.00187593	0.0266012	-1.13502	REST	chr4	57774042 - 57813577	39535
TC15000767.hg.1	-0.493178	9.09997	-6.3074	0.000167518	0.00975074	1.306	GOLGA6L9, GOLGA6L3	chr15	82710856 - 82731586	20730
TC22000198.hg.1	-0.48822	9.70325	-4.74769	0.00117686	0.0216946	-0.661023	NEFH	chr22	29876181 - 29887379	11198
TC01002500.hg.1	-0.48597	10.9316	-4.03848	0.00320136	0.0345987	-1.67836	CLSPN	chr1	36185819 - 36235568	49749
TC02000927.hg.1	-0.484925	10.3315	-3.61218	0.00604672	0.0478324	-2.32335	KIF5C	chr2	149632792 - 149883273	250481
TC07001844.hg.1	-0.48412	10.7037	-3.7194	0.00514108	0.0443989	-2.15905	RBM28	chr7	127950436 - 127983962	33526
TC04001520.hg.1	-0.483973	9.83163	-4.33714	0.0020818	0.0280389	-1.2409	IL2	chr4	123372625 - 123377880	5255
TC09001689.hg.1	-0.481947	10.0351	-8.84516	1.29683e-05	0.00496971	3.79626	REXO4	chr9	136271186 - 136283164	11978
TC10000659.hg.1	-0.480593	10.8736	-8.66469	1.52418e-05	0.00496971	3.6437	KIF11	chr10	94352825 - 94415152	62327
TC11001517.hg.1	-0.47983	10.62	-4.7835	0.00112105	0.0212531	-0.611666	KIF18A	chr11	28042163 - 28129746	87583
TC0X001259.hg.1	-0.479799	8.04828	-5.92942	0.000260717	0.0116666	0.863072	RBM41	chrX	106305118 - 106362057	56939
TC15000774.hg.1	-0.478581	9.47885	-7.18589	6.40506e-05	0.00729377	2.2581	GOLGA6L9, GOLGA6L3	chr15	82804003 - 83195247	391244
TC07001975.hg.1	-0.475356	8.69088	-3.77377	0.00473775	0.0424476	-2.07624	FAM115A	chr7	143548461 - 143599291	50830
TC02002067.hg.1	-0.473304	9.39546	-4.17074	0.00264166	0.0312706	-1.48307	KRCC1	chr2	88326724 - 88355282	28558
TC01001202.hg.1	-0.473274	8.77602	-4.80982	0.00108185	0.0209426	-0.575512	GABPB2	chr1	151043054 - 151098018	54964
TC17001125.hg.1	-0.470977	10.4184	-8.68654	1.49444e-05	0.00496971	3.66235	STX8	chr17	9153788 - 9479275	325487
TC14000316.hg.1	-0.470641	10.135	-4.43703	0.00180792	0.026071	-1.09747	CDKN3	chr14	54863673 - 54886936	23263
TC02001377.hg.1	-0.470273	10.4513	-4.77812	0.00112925	0.0212531	-0.619069	SP100	chr2	231280657 - 231410317	129660
TC14001350.hg.1	-0.470037	10.5199	-5.14384	0.000694701	0.0172259	-0.126057	SNW1	chr14	78183942 - 78227533	43591
TC19000328.hg.1	-0.468824	9.5677	-8.20986	2.31874e-05	0.00543531	3.24404	USE1	chr19	17326155 - 17330638	4483
TC15000638.hg.1	-0.46877	10.8975	-4.30297	0.00218543	0.0284056	-1.2903	KIF23	chr15	69706585 - 69740764	34179
TC17001545.hg.1	-0.468128	9.81079	-3.94257	0.00368574	0.0372288	-1.82147	BECN1	chr17	40962150 - 40976310	14160
TC17000860.hg.1	-0.463721	10.4512	-5.17435	0.000667684	0.0169668	-0.0858631	SAP30BP	chr17	73663399 - 73704139	40740
TC10001545.hg.1	-0.46177	10.8077	-3.70888	0.00522324	0.044506	-2.17512	NOC3L	chr10	96075004 - 96122716	47712
TC01003108.hg.1	-0.460446	9.84243	-4.55606	0.00153114	0.0242574	-0.928506	POLR3GL	chr1	145456236 - 145470388	14152
TC16001278.hg.1	-0.460058	9.55487	-5.31696	0.000555678	0.0156673	0.100058	CFDP1	chr16	75327608 - 75467387	139779
TC09000874.hg.1	-0.459037	10.5147	-5.20592	0.00064093	0.0167211	-0.0444357	KIAA0020	chr9	2720469 - 2844241	123772
TC02002098.hg.1	-0.458027	11.9351	-4.24636	0.00236951	0.0297859	-1.37253	ANKRD36C	chr2	96514587 - 96657541	142954
TC06001895.hg.1	-0.457967	11.4614	-3.77478	0.00473061	0.0424476	-2.07471	PHIP	chr6	79644136 - 79788011	143875
TC19000119.hg.1	-0.455937	10.9945	-8.67171	1.51456e-05	0.00496971	3.64969	VAV1	chr19	6772722 - 6857372	84650
TC11002208.hg.1	-0.453871	10.1132	-5.08914	0.000746148	0.0175881	-0.198475	FAM76B	chr11	95502106 - 95522955	20849
TC0X001318.hg.1	-0.453703	10.5502	-5.14504	0.000693616	0.0172259	-0.124474	NKAP	chrX	119059013 - 119077735	18722
TC11002049.hg.1	-0.453617	10.8732	-4.18041	0.0026051	0.0311365	-1.4689	NUMA1	chr11	71713910 - 71791739	77829
TC01003324.hg.1	-0.453125	9.25701	-3.56477	0.00649962	0.0499481	-2.39641	RIT1	chr1	155867599 - 155881195	13596
TC12002018.hg.1	-0.45209	10.9558	-3.74336	0.004959	0.0436134	-2.12251	TAOK3	chr12	118587606 - 118810750	223144
TC12000260.hg.1	-0.449803	9.24345	-5.50532	0.000437909	0.0142488	0.340813	FGFR1OP2	chr12	27091305 - 27119583	28278
TC13000510.hg.1	-0.449391	9.59972	-7.26998	5.86862e-05	0.00720593	2.34388	MTIF3	chr13	28009776 - 28024739	14963
TC01000900.hg.1	-0.449134	10.0753	-5.61732	0.000380965	0.0134226	0.481385	RTCA	chr1	100731714 - 100758325	26611
TC01001430.hg.1	-0.447973	11.0678	-3.88934	0.00398778	0.0385552	-1.90143	NUF2	chr1	163291690 - 163325554	33864
TC19001081.hg.1	-0.446907	11.0647	-5.47688	0.0004538	0.0144787	0.304814	LONP1	chr19	5691845 - 5720463	28618
TC01002327.hg.1	-0.443491	10.1176	-4.62083	0.00139998	0.0233523	-0.837468	USP48	chr1	22004791 - 22110099	105308
TC01000934.hg.1	-0.439308	9.35007	-3.86435	0.0041385	0.0391878	-1.93908	STXBP3	chr1	109289285 - 109352148	62863
TC20000681.hg.1	-0.439173	11.0805	-4.70929	0.00124004	0.0219801	-0.714163	CRNKL1	chr20	20015012 - 20036690	21678
TC20000759.hg.1	-0.438691	9.78342	-3.87747	0.00405861	0.0389776	-1.9193	PDRG1	chr20	30532758 - 30539895	7137
TC0X000376.hg.1	-0.434638	10.3751	-4.14391	0.00274614	0.0319901	-1.5225	KIF4A	chrX	69509879 - 69640774	130895
TC04001647.hg.1	-0.430591	10.1344	-4.31289	0.00215478	0.0282919	-1.27594	FBXW7	chr4	153242410 - 153456393	213983
TC15000808.hg.1	-0.428922	9.65554	-6.13137	0.000205375	0.0104394	1.10231	GOLGA6L4	chr15	84904525 - 84914120	9595
TC01000407.hg.1	-0.428012	10.2812	-4.89956	0.000958955	0.019657	-0.453057	ZCCHC17	chr1	31769842 - 31837783	67941
TC04001176.hg.1	-0.426432	7.66192	-4.32379	0.00212163	0.0281136	-1.26018	TEC	chr4	48137800 - 48271881	134081
TC08000712.hg.1	-0.42486	9.33316	-4.36786	0.00199311	0.0273607	-1.19663	WDR67	chr8	124054208 - 124164393	110185
TC01000292.hg.1	-0.42341	11.2987	-4.00534	0.00336057	0.0354775	-1.72767	KDM1A	chr1	23345941 - 23410184	64243
TC12001747.hg.1	-0.423059	10.4631	-3.9813	0.00348134	0.0362382	-1.76353	KRR1	chr12	75890684 - 75905418	14734
TC02001177.hg.1	-0.422198	9.93329	-3.85534	0.00419436	0.0394889	-1.95268	CASP8	chr2	202098166 - 202152434	54268
TC02002120.hg.1	-0.42112	11.4673	-4.36126	0.00201183	0.0273607	-1.20614	ANKRD36B	chr2	98108235 - 98206428	98193
TC05001405.hg.1	-0.41918	10.2884	-4.09001	0.00296956	0.0333089	-1.60199	SREK1IP1	chr5	64013978 - 64064512	50534
TC15002013.hg.1	-0.418371	9.38622	-5.14572	0.000693001	0.0172259	-0.123574	TARSL2	chr15	102193801 - 102264807	71006
TC12003278.hg.1	-0.418197	10.8619	-5.89874	0.000270466	0.0119026	0.8262	SARNP	chr12	56146247 - 56211540	65293
TC19001169.hg.1	-0.417137	11.158	-5.34254	0.000537831	0.0154527	0.133084	KRI1	chr19	10663761 - 10676713	12952
TC13000454.hg.1	-0.417127	9.71439	-5.23464	0.000617596	0.0163819	-0.00687714	ZMYM5	chr13	20397622 - 20437776	40154
TC17001637.hg.1	-0.41709	11.5633	-3.55787	0.00656844	0.0499636	-2.40706	SKAP1	chr17	46210802 - 46507594	296792
TC17001703.hg.1	-0.41666	9.37506	-6.60139	0.00012022	0.00877108	1.63634	MBTD1	chr17	49254786 - 49337524	82738
TC01001033.hg.1	-0.41593	10.9318	-4.43554	0.00181173	0.026071	-1.0996	WDR3	chr1	118472343 - 118503049	30706
TC10001480.hg.1	-0.415598	10.4008	-4.81239	0.0010781	0.0209426	-0.571979	WAPAL	chr10	88195013 - 88281572	86559
TC0X000423.hg.1	-0.415046	9.1716	-3.67198	0.00552253	0.0458654	-2.23155	COX7B	chrX	77154935 - 77162870	7935
TC03000318.hg.1	-0.414085	8.79269	-3.77852	0.00470413	0.0422783	-2.06902	DOCK3	chr3	50712672 - 51421629	708957
TC07000549.hg.1	-0.413983	9.28337	-4.19201	0.0025619	0.03104	-1.4519	RBM48	chr7	92158087 - 92167319	9232
TC09002917.hg.1	-0.413606	8.96404	-4.11729	0.00285416	0.032555	-1.56171	CDC26	chr9	116018115 - 116037869	19754
TC09001397.hg.1	-0.413591	9.9635	-4.25385	0.0023442	0.0296468	-1.36161	XPA	chr9	100437191 - 100459691	22500
TC11000649.hg.1	-0.412303	10.8324	-5.12767	0.000709501	0.0173598	-0.147422	SART1	chr11	65729160 - 65747607	18447
TC02005009.hg.1	-0.411247	11.7539	-4.66003	0.00132652	0.0229119	-0.782678	SP140	chr2	231090444 - 231177930	87486
TC19000505.hg.1	-0.40992	8.54062	-4.98104	0.000860366	0.018736	-0.342947	ZNF567	chr19	37178530 - 37214248	35718
TC17000495.hg.1	-0.40955	10.386	-4.65394	0.00133766	0.0230082	-0.791179	CDC6	chr17	38443885 - 38459413	15528
TC03003394.hg.1	-0.40782	9.8504	-4.18382	0.0025923	0.0311	-1.46389	ISY1	chr3	128846258 - 128880136	33878
TC12002076.hg.1	-0.407517	11.0594	-3.70996	0.00521473	0.044506	-2.17346	RSRC2	chr12	122989190 - 123011560	22370
TC17001785.hg.1	-0.40714	11.3928	-4.20078	0.00252975	0.0307479	-1.43906	CCDC47	chr17	61822610 - 61851088	28478
TC20000253.hg.1	-0.406911	9.44219	-6.27424	0.000174021	0.0098514	1.26797	CEP250	chr20	34042985 - 34099804	56819
TC15000322.hg.1	-0.406902	9.42878	-6.46199	0.000140518	0.0091627	1.48121	STARD9	chr15	42867857 - 43013196	145339
TC08000382.hg.1	-0.40683	10.9589	-4.43392	0.00181584	0.026071	-1.10191	TGS1	chr8	56685701 - 56738007	52306
TC04002921.hg.1	-0.406527	11.515	-4.14306	0.00274952	0.031997	-1.52375	SDAD1	chr4	76871059 - 76912115	41056
TC15002757.hg.1	-0.406177	12.3315	-4.01106	0.0033325	0.0353763	-1.71915	GOLGA8B	chr15	34817408 - 34875771	58363
TC05001826.hg.1	-0.405436	10.2961	-4.66207	0.00132282	0.0228823	-0.779837	BRD8	chr5	137475455 - 137514675	39220
TC06001302.hg.1	-0.405243	11.118	-4.8215	0.00106492	0.0208022	-0.559493	DEK	chr6	18224099 - 18265054	40955
TC02000669.hg.1	-0.403788	8.4389	-4.4266	0.00183463	0.0263078	-1.11238	CCDC138	chr2	109403213 - 109493034	89821
TC14001159.hg.1	-0.401676	9.88599	-5.47466	0.000455063	0.0144788	0.302006	ATG14	chr14	55833109 - 55878576	45467
TC05000275.hg.1	-0.401463	9.50043	-4.43901	0.00180291	0.026048	-1.09464	CWC27	chr5	64064755 - 64314590	249835
TC17001064.hg.1	-0.400991	9.78069	-4.98669	0.000853949	0.0187353	-0.33535	KIAA0753	chr17	6481645 - 6544247	62602
TC08000479.hg.1	-0.400213	9.89005	-3.56176	0.00652952	0.0499481	-2.40105	TERF1	chr8	73921097 - 73960357	39260
TC11002240.hg.1	-0.398303	10.3502	-4.67681	0.00129637	0.0226166	-0.759307	DCUN1D5	chr11	102921413 - 102962944	41531
TC19001792.hg.1	-0.398067	8.41656	-4.10128	0.00292128	0.0329079	-1.58533	ZNF615	chr19	52494586 - 52511483	16897
TC20000209.hg.1	-0.397517	11.1494	-5.18476	0.000658734	0.0169267	-0.0721917	KIF3B	chr20	30865454 - 30922814	57360
TC21000039.hg.1	-0.396937	10.8284	-4.92108	0.000931776	0.0194505	-0.423869	USP25	chr21	17102344 - 17252377	150033
TC0X001221.hg.1	-0.396873	10.9736	-8.43504	1.87954e-05	0.00531491	3.44467	ARMCX6	chrX	100870108 - 100872991	2883
TC12001824.hg.1	-0.395311	9.96333	-3.89587	0.00394935	0.0385412	-1.8916	CCDC41	chr12	94702056 - 94853764	151708
TC12001778.hg.1	-0.39381	10.3605	-5.42322	0.00048552	0.0147765	0.236546	CCDC59	chr12	82746083 - 82752584	6501
TC19000102.hg.1	-0.393723	10.9917	-4.44312	0.00179253	0.0260206	-1.08877	SAFB	chr19	5623046 - 5668489	45443
TC04001540.hg.1	-0.392956	8.60083	-4.46195	0.00174582	0.0257084	-1.06192	SCLT1	chr4	129786076 - 130014764	228688
TC15001492.hg.1	-0.391603	10.8032	-4.5478	0.0015488	0.0243359	-0.940171	MYO1E	chr15	59427113 - 59665099	237986
TC01000738.hg.1	-0.39075	10.3567	-3.81832	0.00443232	0.0408373	-2.00866	MIER1	chr1	67390578 - 67454302	63724
TC16001174.hg.1	-0.389927	11.1754	-3.72536	0.00509512	0.0441918	-2.14995	NAE1	chr16	66836778 - 66864900	28122
TC05000168.hg.1	-0.38771	10.9152	-4.72163	0.00121935	0.0217871	-0.697069	WDR70	chr5	37379314 - 37753537	374223
TC12000830.hg.1	-0.386973	11.2013	-5.03127	0.000805099	0.0183002	-0.27559	PWP1	chr12	108079509 - 108106944	27435
TC17001786.hg.1	-0.3868	11.5432	-3.68023	0.00545409	0.0455936	-2.21892	FTSJ3	chr17	61896793 - 61905031	8238
TC14000104.hg.1	-0.385632	9.58139	-5.03172	0.000804623	0.0183002	-0.274991	TRAV14DV4	chr14	22392239 - 22392828	589
TC11000228.hg.1	-0.384456	8.57448	-4.2308	0.00242296	0.0300541	-1.39521	NUCB2	chr11	17281887 - 17371521	89634
TC0X001316.hg.1	-0.38408	8.91161	-6.33558	0.0001622	0.00965299	1.33819	RNF113A	chrX	119004438 - 119005791	1353
TC03003351.hg.1	-0.38386	10.9077	-4.35922	0.00201763	0.0273607	-1.20907	RBM6	chr3	49977440 - 50114685	137245
TC08001171.hg.1	-0.383309	10.1273	-4.26105	0.00232019	0.0294147	-1.35114	ANK1	chr8	41510739 - 41754280	243541
TC02000589.hg.1	-0.382223	11.7309	-4.17269	0.00263426	0.0312706	-1.48021	ANKRD36, ANKRD36C	chr2	97779233 - 97930258	151025
TC19000497.hg.1	-0.38146	11.3632	-3.62692	0.00591283	0.04755	-2.30069	ZNF146	chr19	36705504 - 36729675	24171
TC06000633.hg.1	-0.38043	10.3362	-4.42406	0.0018412	0.0263196	-1.11601	CD2AP	chr6	47445525 - 47594999	149474
TC11000979.hg.1	-0.380417	10.4571	-4.87713	0.000988185	0.0200181	-0.483542	ACAT1	chr11	107992243 - 108018891	26648
TC05001379.hg.1	-0.378311	9.32336	-3.86674	0.00412387	0.0390815	-1.93548	MIER3	chr5	56215429 - 56267502	52073
TC17001434.hg.1	-0.377887	10.8139	-3.78325	0.00467096	0.0421782	-2.06185	CWC25	chr17	36957446 - 36981608	24162
TC01003629.hg.1	-0.377797	10.6903	-3.71602	0.00516735	0.0444658	-2.16422	IVNS1ABP	chr1	185265520 - 185286461	20941
TC14001034.hg.1	-0.377701	10.0086	-3.82711	0.0043745	0.0404879	-1.99534	PPP2R3C	chr14	35554673 - 35591679	37006
TC17000444.hg.1	-0.375183	11.8548	-3.99073	0.00343345	0.035863	-1.74946	AATF	chr17	35306175 - 35414171	107996
TC10000002.hg.1	-0.373309	9.90017	-4.86033	0.00101072	0.0203071	-0.506435	ZMYND11	chr10	180405 - 300577	120172
TC05001408.hg.1	-0.37257	10.8672	-4.33219	0.00209647	0.0281064	-1.24804	CENPK	chr5	64813593 - 64858998	45405
TC16002038.hg.1	-0.371757	11.3184	-8.30188	2.12688e-05	0.00536237	3.3267	DDX19B	chr16	70328700 - 70369186	40486
TC17001055.hg.1	-0.371043	11.9149	-3.87005	0.0041036	0.039071	-1.93048	NUP88	chr17	5289346 - 5323059	33713
TC06002090.hg.1	-0.371028	9.44312	-3.5844	0.00630786	0.0489872	-2.36612	SOGA3, KIAA0408	chr6	127759551 - 127840500	80949
TC15002756.hg.1	-0.369883	12.4865	-4.15567	0.00269983	0.0317078	-1.50521	GOLGA8A	chr15	34671265 - 34729667	58402
TC05001297.hg.1	-0.369599	8.73403	-4.398	0.00191002	0.0268854	-1.15333	TTC33	chr5	40711678 - 40756077	44399
TC20000302.hg.1	-0.36944	12.0962	-3.66629	0.00557028	0.0460372	-2.24027	TOP1	chr20	39657458 - 39753127	95669
TC16000375.hg.1	-0.369004	9.74488	-6.4097	0.000149075	0.00930586	1.42233	ITGAX	chr16	31366509 - 31394318	27809
TC06001504.hg.1	-0.368893	10.4534	-4.31243	0.0021562	0.0282919	-1.27661	DHX16	chr6	30620896 - 30640830	19934
TC21001069.hg.1	-0.3678	11.2215	-6.35849	0.000158014	0.00949491	1.36428	SAMSN1	chr21	15857549 - 15918681	61132
TC17001521.hg.1	-0.367787	11.5783	-3.55932	0.00655385	0.0499481	-2.40481	DNAJC7	chr17	40128439 - 40169715	41276
TC0X000470.hg.1	-0.36679	9.86516	-4.77296	0.00113717	0.0213076	-0.62617	CSTF2	chrX	100075348 - 100096485	21137
TC15001719.hg.1	-0.366744	9.02188	-6.24976	0.000179	0.0098514	1.23979	BCL2A1	chr15	80253231 - 80263788	10557
TC03000965.hg.1	-0.366052	9.78728	-4.73937	0.00119024	0.0217369	-0.672511	FXR1	chr3	180585929 - 180700539	114610
TC04000239.hg.1	-0.36489	10.3762	-4.1068	0.00289796	0.0328444	-1.57719	N4BP2	chr4	40058446 - 40159872	101426
TC14002344.hg.1	-0.364823	9.12977	-4.46435	0.00173994	0.0256877	-1.05849	C14orf182	chr14	50448430 - 50474238	25808
TC05000299.hg.1	-0.36477	9.43408	-5.41302	0.000491815	0.0147765	0.223527	CENPH	chr5	68485375 - 68506184	20809
TC01000492.hg.1	-0.364677	11.0606	-3.78784	0.00463891	0.041967	-2.05487	NDUFS5	chr1	39491967 - 39500308	8341
TC01000575.hg.1	-0.364557	11.0013	-4.52638	0.00159561	0.0245344	-0.970442	NASP	chr1	46049518 - 46084578	35060
TC15000704.hg.1	-0.364503	10.3696	-5.36121	0.000525203	0.0152746	0.157117	UBE2Q2	chr15	76135622 - 76193419	57797
TC05001295.hg.1	-0.363783	11.1138	-5.45943	0.000463858	0.0145174	0.282667	FYB	chr5	39105338 - 39274630	169292
TC14001084.hg.1	-0.363746	9.19008	-5.83736	0.000291188	0.0121621	0.752002	FKBP3	chr14	45584802 - 45604522	19720
TC11002004.hg.1	-0.362677	8.73615	-4.14671	0.00273502	0.0319532	-1.51837	SUV420H1	chr11	67922330 - 67981295	58965
TC10001160.hg.1	-0.361963	12.2452	-3.71561	0.00517048	0.0444658	-2.16483	KIF5B	chr10	32297938 - 32345371	47433
TC03001353.hg.1	-0.361568	9.93217	-4.29991	0.00219497	0.0284874	-1.29473	FYCO1	chr3	45959391 - 46037316	77925
TC18000160.hg.1	-0.36126	10.5976	-5.50003	0.000440817	0.0142626	0.33413	SETBP1	chr18	42260138 - 42648475	388337
TC16001172.hg.1	-0.360259	9.38422	-6.11788	0.00020864	0.0105137	1.08652	DYNC1LI2	chr16	66754796 - 66785701	30905
TC11003434.hg.1	-0.358581	9.307	-3.72971	0.00506191	0.0440129	-2.14333	REXO2	chr11	114310108 - 114321001	10893
TC17000438.hg.1	-0.358153	9.84675	-4.04839	0.00315531	0.034435	-1.66364	GGNBP2	chr17	34900737 - 34946278	45541
TC07001597.hg.1	-0.356899	9.98596	-4.94351	0.000904338	0.0192713	-0.393531	KRIT1	chr7	91828283 - 91875480	47197
TC14002297.hg.1	-0.356667	10.667	-4.18408	0.00259135	0.0311	-1.46352	MNAT1	chr14	61201459 - 61436671	235212
TC16000430.hg.1	-0.35643	10.4025	-6.43626	0.000144659	0.0091627	1.45229	LONP2	chr16	48278207 - 48389415	111208
TC10000413.hg.1	-0.355793	11.9788	-3.5624	0.00652314	0.0499481	-2.40006	DDX21	chr10	70715884 - 70744829	28945
TC07000641.hg.1	-0.355288	9.91221	-3.78807	0.00463736	0.041967	-2.05453	TRIM56	chr7	100728720 - 100735017	6297
TC16001284.hg.1	-0.35397	11.7579	-6.36316	0.000157175	0.00949491	1.36958	KARS	chr16	75661622 - 75682541	20919
TC12001974.hg.1	-0.351844	10.2227	-3.97644	0.00350634	0.0363155	-1.7708	BRAP	chr12	112079950 - 112123790	43840
TC04000683.hg.1	-0.351283	10.533	-3.67443	0.00550214	0.0457953	-2.22781	NAA15	chr4	140222609 - 140341187	118578
TC13000367.hg.1	-0.35035	10.3177	-5.83122	0.000293352	0.012208	0.744558	TPP2	chr13	103249286 - 103331523	82237
TC17000991.hg.1	-0.34859	11.0025	-4.11904	0.0028469	0.032555	-1.55912	TSR1	chr17	2225982 - 2240678	14696
TC05000573.hg.1	-0.34737	11.2273	-3.63338	0.0058551	0.0472281	-2.29076	SRFBP1	chr5	121297656 - 121411265	113609
TC15000364.hg.1	-0.346926	10.2352	-5.96326	0.000250407	0.0114339	0.903579	SQRDL	chr15	45923346 - 45983492	60146
TC10001624.hg.1	-0.346306	9.61808	-5.09692	0.000738583	0.0175371	-0.188143	ARL3	chr10	104433484 - 104474190	40706
TC19001079.hg.1	-0.34524	10.7877	-4.05262	0.0031359	0.0343593	-1.65737	SAFB2	chr19	5587010 - 5622938	35928
TC10000664.hg.1	-0.345173	11.2971	-3.99486	0.00341267	0.0356994	-1.7433	CEP55	chr10	95256369 - 95288849	32480
TC15000381.hg.1	-0.34509	10.297	-6.5432	0.000128273	0.00899757	1.57192	EID1	chr15	49170083 - 49172380	2297
TC04001180.hg.1	-0.344604	9.19125	-5.63468	0.000372881	0.013293	0.50301	OCIAD2	chr4	48887036 - 48908954	21918
TC17000772.hg.1	-0.343363	10.5128	-4.53404	0.00157869	0.0244049	-0.9596	PSMC5	chr17	61904770 - 61909387	4617
TC04000890.hg.1	-0.34322	9.78192	-3.83654	0.00431343	0.0401491	-1.98108	ING2	chr4	184426147 - 184432249	6102
TC04001745.hg.1	-0.342883	10.6517	-3.9307	0.00375096	0.0373988	-1.83928	MORF4	chr4	174537087 - 174537794	707
TC19000547.hg.1	-0.339887	11.6437	-3.60623	0.00610173	0.0479702	-2.33251	SUPT5H	chr19	39936186 - 39967308	31122
TC15000588.hg.1	-0.33971	10.4384	-7.34313	5.44206e-05	0.00720593	2.41776	SNX1	chr15	64386322 - 64436433	50111
TC01000707.hg.1	-0.33908	10.8044	-4.04064	0.00319125	0.0345987	-1.67515	USP1	chr1	62901968 - 62917475	15507
TC15001576.hg.1	-0.338154	9.26491	-3.5583	0.00656406	0.0499634	-2.40638	TIPIN	chr15	66628722 - 66649054	20332
TC02000642.hg.1	-0.337592	8.41333	-4.01684	0.0033044	0.0352735	-1.71055	MRPS9	chr2	105654441 - 105716418	61977
TC11001289.hg.1	-0.336682	10.177	-6.46921	0.000139378	0.0091627	1.48932	CARS	chr11	3022152 - 3078843	56691
TC21001072.hg.1	-0.33425	10.4819	-3.82789	0.00436945	0.0404879	-1.99417	C21orf59	chr21	33964389 - 33985176	20787
TC18000277.hg.1	-0.333518	9.86279	-4.52308	0.00160295	0.0246143	-0.975111	ENOSF1	chr18	670324 - 712676	42352
TC07000953.hg.1	-0.333311	8.09807	-4.00433	0.00336557	0.035494	-1.72918	CTAGE4	chr7	143880548 - 143883173	2625
TC08000193.hg.1	-0.332885	8.18991	-4.3711	0.00198399	0.0273567	-1.19197	NEFM	chr8	24770525 - 24776607	6082
TC20000385.hg.1	-0.332387	11.1305	-4.22047	0.00245915	0.0302418	-1.41028	DDX27	chr20	47835832 - 47860614	24782
TC01002652.hg.1	-0.33011	11.5109	-3.59423	0.0062141	0.0484227	-2.35097	NRD1	chr1	52254863 - 52344609	89746
TC20000531.hg.1	-0.32979	11.2427	-6.65695	0.000113044	0.00862661	1.69742	PRPF6	chr20	62612431 - 62664453	52022
TC06002241.hg.1	-0.328366	8.62548	-4.91612	0.000937972	0.0194505	-0.430598	MTRF1L	chr6	153308400 - 153323925	15525
TC01006296.hg.1	-0.32741	11.4202	-5.48706	0.000448037	0.0143909	0.317723	CDK11B	chr1	1571100 - 1655775	84675
TC05000697.hg.1	-0.32735	10.5872	-5.52627	0.000426586	0.0141612	0.367263	KIF20A	chr5	137514408 - 137523404	8996
TC12001425.hg.1	-0.326889	10.2255	-3.62383	0.0059406	0.04755	-2.30543	SCAF11	chr12	46312914 - 46385903	72989
TC08000505.hg.1	-0.326402	9.0295	-3.6424	0.00577554	0.0469919	-2.27691	PKIA	chr8	79428336 - 79517502	89166
TC09001628.hg.1	-0.323732	10.1066	-5.74435	0.000325957	0.012468	0.638511	GOLGA2	chr9	131018108 - 131038274	20166
TC10001022.hg.1	-0.323543	9.08322	-5.43096	0.000480794	0.0147702	0.246432	KIN	chr10	7792925 - 7829990	37065
TC19000090.hg.1	-0.322187	10.7207	-5.2435	0.000610586	0.0163502	0.00468125	HDGFRP2	chr19	4472255 - 4502222	29967
TC12000232.hg.1	-0.321255	9.14594	-3.71442	0.0051798	0.0444658	-2.16665	PYROXD1	chr12	21590538 - 21624182	33644
TC21000130.hg.1	-0.321183	10.7912	-3.7531	0.00488697	0.0432782	-2.10768	SON	chr21	34914924 - 34949812	34888
TC07000395.hg.1	-0.32095	8.61192	-4.14716	0.00273326	0.0319532	-1.51772	ZNF92	chr7	64838712 - 64866038	27326
TC08000146.hg.1	-0.319849	7.95156	-5.99199	0.000242002	0.0114339	0.93784	SH2D4A	chr8	19171081 - 19253729	82648
TC19001216.hg.1	-0.318557	10.3537	-3.8027	0.00453692	0.0412598	-2.03232	GADD45GIP1	chr19	13064972 - 13068050	3078
TC19000720.hg.1	-0.318393	10.8776	-5.24586	0.00060873	0.0163502	0.00776371	RUVBL2	chr19	49497156 - 49519183	22027
TC17000781.hg.1	-0.318249	8.82229	-7.16521	6.54509e-05	0.00729377	2.23687	RGS9	chr17	63133456 - 63223821	90365
TC01003881.hg.1	-0.317967	10.3895	-4.05913	0.00310623	0.0342065	-1.64771	NVL	chr1	224415036 - 224518089	103053
TC01002800.hg.1	-0.317379	9.15872	-4.51092	0.00163032	0.0248025	-0.992325	USP33	chr1	78161672 - 78225537	63865
TC05001522.hg.1	-0.315723	8.90921	-3.97734	0.00350172	0.0363135	-1.76946	HOMER1	chr5	78668459 - 78810040	141581
TC20000657.hg.1	-0.315233	10.2446	-8.06673	2.65621e-05	0.00573284	3.11361	RRBP1	chr20	17594323 - 17662940	68617
TC0X000227.hg.1	-0.314717	11.1994	-4.32795	0.00210915	0.0281064	-1.25417	RBM10	chrX	47004268 - 47046214	41946
TC01003343.hg.1	-0.314663	10.2896	-5.85942	0.000283546	0.0120447	0.778741	IQGAP3	chr1	156495197 - 156542396	47199
TC06000117.hg.1	-0.314388	8.55207	-4.41271	0.00187083	0.0265617	-1.13225	KDM1B	chr6	18155560 - 18224084	68524
TC20000276.hg.1	-0.314369	9.92405	-4.32647	0.00211359	0.0281064	-1.25631	CTNNBL1	chr20	36322408 - 36500531	178123
TC06000073.hg.1	-0.314257	11.5644	-3.62044	0.0059713	0.0475599	-2.31065	PAK1IP1	chr6	10694928 - 10710015	15087
TC17001822.hg.1	-0.31425	9.73022	-3.80853	0.00449757	0.0411299	-2.02349	WIPI1	chr17	66417422 - 66453653	36231
TC17001037.hg.1	-0.314197	11.0304	-5.82118	0.000296931	0.0122242	0.732364	SPAG7	chr17	4862521 - 4871132	8611
TC18000088.hg.1	-0.313203	11.7948	-3.99649	0.00340454	0.0356542	-1.74087	SNRPD1	chr18	19192260 - 19210208	17948
TC12001828.hg.1	-0.313165	10.0843	-3.6572	0.00564744	0.0463663	-2.2542	NR2C1	chr12	95414058 - 95467479	53421
TC13000758.hg.1	-0.31266	11.19	-6.9041	8.63499e-05	0.0079985	1.96402	RBM26	chr13	79888876 - 79980612	91736
TC04001307.hg.1	-0.312346	8.85142	-5.27934	0.000583098	0.0160997	0.0513147	NUP54	chr4	77035812 - 77069668	33856
TC06001207.hg.1	-0.312228	9.97145	-3.83798	0.00430419	0.0400957	-1.97891	EXOC2	chr6	485133 - 693117	207984
TC14001429.hg.1	-0.312077	9.72883	-4.6453	0.00135363	0.0231711	-0.803244	C14orf102	chr14	90742580 - 90798481	55901
TC16000977.hg.1	-0.312017	9.9695	-3.89569	0.00395041	0.0385412	-1.89187	NSMCE1	chr16	27236315 - 27280113	43798
TC11002204.hg.1	-0.311683	11.0244	-5.14875	0.000690277	0.0172259	-0.119583	CWC15	chr11	94695787 - 94706776	10989
TC06000882.hg.1	-0.311487	9.79705	-5.24971	0.000605727	0.0163319	0.0127709	CDC40	chr6	110501344 - 110575478	74134
TC17001728.hg.1	-0.311389	8.93141	-5.94987	0.000254432	0.0115445	0.887573	BZRAP1	chr17	56378592 - 56406152	27560
TC14002290.hg.1	-0.311258	8.17944	-4.3668	0.0019961	0.0273607	-1.19816	TRAV5	chr14	22217395 - 22217989	594
TC21000204.hg.1	-0.310732	8.77873	-4.55057	0.00154285	0.0243088	-0.936253	PDE9A	chr21	44073746 - 44195619	121873
TC01002769.hg.1	-0.310066	9.61307	-4.79416	0.00110499	0.0211885	-0.597009	LRRC40	chr1	70610485 - 70671361	60876
TC07000524.hg.1	-0.309767	10.2628	-3.92444	0.00378579	0.0375831	-1.84866	DBF4	chr7	87505531 - 87538856	33325
TC01006413.hg.1	-0.309687	8.36864	-4.6761	0.00129761	0.0226166	-0.760283	CCDC19	chr1	159842154 - 159869953	27799
TC10000008.hg.1	-0.309547	10.7866	-4.6041	0.00143266	0.0235416	-0.860925	GTPBP4	chr10	1034338 - 1065876	31538
TC0X001095.hg.1	-0.309332	8.62967	-3.78641	0.00464887	0.0420118	-2.05704	FAM123B	chrX	63404997 - 63425624	20627
TC12001962.hg.1	-0.309257	9.47857	-3.63118	0.00587473	0.0473192	-2.29415	GPN3	chr12	110890289 - 110907073	16784
TC01002845.hg.1	-0.30896	10.4261	-4.33315	0.00209363	0.0281064	-1.24667	GBP3	chr1	89472360 - 89488549	16189
TC06000745.hg.1	-0.308647	10.3248	-3.65999	0.00562364	0.0463034	-2.24993	SENP6	chr6	76311225 - 76427997	116772
TC02001658.hg.1	-0.307927	10.3375	-6.52886	0.000130347	0.00901906	1.55597	DNMT3A	chr2	25455496 - 25565459	109963
TC17000757.hg.1	-0.307692	10.1512	-3.58642	0.00628849	0.0489029	-2.36301	TLK2	chr17	60536019 - 60692841	156822
TC14000346.hg.1	-0.307347	10.7153	-3.89515	0.00395357	0.0385412	-1.89268	PSMA3	chr14	58711523 - 58738730	27207
TC16002093.hg.1	-0.306847	10.393	-4.47445	0.00171553	0.0255571	-1.04412	KLHDC4	chr16	87741418 - 87799603	58185
TC06001100.hg.1	-0.306732	8.2693	-4.74542	0.00118049	0.0216946	-0.664156	AKAP12	chr6	151561134 - 151679694	118560
TC04000549.hg.1	-0.306523	11.0445	-4.82625	0.00105813	0.0207256	-0.552997	AIMP1	chr4	107236701 - 107270383	33682
TC12003236.hg.1	-0.306353	10.7624	-4.11787	0.00285176	0.032555	-1.56085	CLEC2D	chr12	9821233 - 9852151	30918
TC02000500.hg.1	-0.305993	12.7925	-4.24538	0.00237281	0.0297859	-1.37395	TMSB10	chr2	85132749 - 85133799	1050
TC05001621.hg.1	-0.305742	8.36456	-4.01464	0.00331505	0.0353072	-1.71382	RIOK2	chr5	96496571 - 96519005	22434
TC22000165.hg.1	-0.305144	10.1427	-3.92705	0.0037712	0.037503	-1.84474	ADRBK2	chr22	25960816 - 26125258	164442
TC01006388.hg.1	-0.305007	11.1918	-3.91665	0.00382968	0.0379259	-1.86036	RBM34	chr1	235294498 - 235324772	30274
TC01003198.hg.1	-0.304757	9.35632	-4.58063	0.00147989	0.0239073	-0.893899	OTUD7B	chr1	149912231 - 149982686	70455
TC08000613.hg.1	-0.303461	8.98056	-4.79598	0.00110226	0.0211716	-0.594498	SPAG1	chr8	101170134 - 101271506	101372
TC02002905.hg.1	-0.302809	9.30136	-4.36449	0.00200264	0.0273607	-1.20148	COL6A3	chr2	238232646 - 238323018	90372
TC07000235.hg.1	-0.301827	11.1472	-4.44698	0.00178285	0.0260206	-1.08327	ANLN	chr7	36429415 - 36493400	63985
TC13000223.hg.1	-0.301427	10.4074	-5.59458	0.000391839	0.0135972	0.453	CKAP2	chr13	53029495 - 53050763	21268
TC0X000981.hg.1	-0.300249	8.61928	-5.044	0.000791711	0.0181936	-0.258582	FUNDC1	chrX	44382885 - 44402247	19362
TC13000653.hg.1	-0.300154	8.70583	-3.96124	0.00358569	0.0366424	-1.79352	MED4	chr13	48627459 - 48669267	41808
TC03002053.hg.1	-0.299151	8.689	-4.15934	0.00268552	0.0315721	-1.49981	MCCC1	chr3	182733006 - 182833863	100857
TC10001346.hg.1	-0.296016	8.69832	-4.7926	0.00110732	0.0211977	-0.599143	RUFY2	chr10	70100864 - 70167051	66187
TC17000363.hg.1	-0.295627	9.18041	-4.809	0.00108305	0.0209426	-0.576634	RAB11FIP4	chr17	29718642 - 29865236	146594
TC03000319.hg.1	-0.29546	10.4808	-4.40777	0.0018839	0.0266468	-1.13933	MANF	chr3	51422478 - 51426828	4350
TC11001002.hg.1	-0.294945	9.78189	-6.4407	0.000143935	0.0091627	1.45728	DIXDC1	chr11	111797868 - 111893308	95440
TC01006391.hg.1	-0.294553	11.854	-3.93248	0.00374108	0.0373787	-1.8366	HNRNPU	chr1	245013602 - 245027844	14242
TC07001266.hg.1	-0.29428	10.3809	-5.52075	0.000429537	0.0141772	0.360303	RP9	chr7	33134409 - 33149013	14604
TC14001046.hg.1	-0.29396	10.8826	-4.66599	0.00131572	0.0228284	-0.774371	MBIP	chr14	36767764 - 36789882	22118
TC14002312.hg.1	-0.292633	10.6942	-3.70356	0.00526532	0.0447319	-2.18325	KLC1	chr14	104095514 - 104167888	72374
TC11001738.hg.1	-0.29212	12.1053	-5.98062	0.000245292	0.0114339	0.924292	PSMC3	chr11	47440320 - 47448024	7704
TC02000904.hg.1	-0.291903	10.196	-6.35989	0.000157762	0.00949491	1.36586	ARHGAP15	chr2	143848931 - 144525921	676990
TC16000723.hg.1	-0.29114	10.1013	-3.95493	0.00361918	0.0367886	-1.80297	LUC7L	chr16	238968 - 385566	146598
TC11000652.hg.1	-0.291067	12.2486	-5.72793	0.000332555	0.0125237	0.618336	SF3B2	chr11	65818297 - 65836779	18482
TC15001278.hg.1	-0.290718	9.73626	-5.17524	0.000666921	0.0169668	-0.084705	TP53BP1	chr15	43699407 - 43802926	103519
TC14000309.hg.1	-0.290529	9.69014	-4.18617	0.00258355	0.0311	-1.46045	PSMC6	chr14	53173890 - 53195305	21415
TC12003216.hg.1	-0.290397	10.8294	-4.77605	0.00113241	0.0212531	-0.621909	GOLGA3	chr12	133345495 - 133405439	59944
TC06004105.hg.1	-0.290369	8.93975	-4.04309	0.00317983	0.0345867	-1.67151	FGFR1OP	chr6	167412670 - 167455906	43236
TC01000563.hg.1	-0.289033	10.5616	-6.26113	0.000176667	0.0098514	1.25289	KIF2C	chr1	45205490 - 45233439	27949
TC12003292.hg.1	-0.288851	9.9712	-4.26535	0.00230597	0.0292991	-1.34489	PPHLN1	chr12	42632249 - 42853517	221268
TC06000169.hg.1	-0.288274	9.72718	-4.62334	0.00139515	0.0233523	-0.833951	HIST1H2BD	chr6	26158349 - 26171577	13228
TC17001720.hg.1	-0.287924	8.9823	-4.39195	0.00192641	0.0269714	-1.16202	MRPS23	chr17	55916287 - 55927433	11146
TC07001641.hg.1	-0.286977	10.8006	-3.96984	0.00354058	0.0364074	-1.78067	PDAP1	chr7	98989671 - 99006452	16781
TC14000195.hg.1	-0.286638	10.0587	-4.53983	0.00156603	0.0243605	-0.951417	SCFD1	chr14	31091318 - 31205018	113700
TC05000260.hg.1	-0.28659	11.0713	-4.56739	0.00150728	0.0241413	-0.912542	NDUFAF2	chr5	60240956 - 60448864	207908
TC05000919.hg.1	-0.28635	10.3818	-3.78765	0.00464027	0.041967	-2.05516	RARS	chr5	167913450 - 167946309	32859
TC06002058.hg.1	-0.285488	8.75317	-3.89255	0.0039688	0.0385412	-1.89659	CEP85L	chr6	118781935 - 119031238	249303
TC10001329.hg.1	-0.28516	10.7479	-4.38711	0.00193961	0.0269714	-1.16896	JMJD1C	chr10	64926981 - 65225722	298741
TC19000682.hg.1	-0.28449	11.3502	-7.26205	5.91704e-05	0.00720593	2.33583	GLTSCR2	chr19	48248793 - 48274141	25348
TC12002032.hg.1	-0.28442	11.1154	-4.25021	0.00235647	0.0297106	-1.36692	CIT	chr12	120123595 - 120315095	191500
TC03001976.hg.1	-0.2842	10.0473	-3.8598	0.00416661	0.0393243	-1.94595	PDCD10	chr3	167401086 - 167452727	51641
TC03000543.hg.1	-0.283574	10.0985	-4.31652	0.0021437	0.0282693	-1.2707	BBX	chr3	107241783 - 107530171	288388
TC05000830.hg.1	-0.28341	11.2757	-4.46743	0.00173246	0.0256761	-1.05411	TCOF1	chr5	149737202 - 149779871	42669
TC13000626.hg.1	-0.283153	10.7365	-3.60681	0.00609633	0.0479702	-2.33161	NUFIP1	chr13	45513384 - 45563618	50234
TC11001835.hg.1	-0.282533	11.0927	-3.71218	0.00519729	0.044493	-2.17007	MRPL16	chr11	59573608 - 59578345	4737
TC06002111.hg.1	-0.28252	7.90287	-4.12994	0.00280226	0.032316	-1.54306	CTAGE9, CTAGE4	chr6	132029581 - 132032206	2625
TC19000674.hg.1	-0.282239	10.2572	-4.25472	0.00234131	0.0296468	-1.36036	CCDC9	chr19	47759731 - 47775213	15482
TC17001869.hg.1	-0.281493	12.2616	-5.41288	0.000491901	0.0147765	0.223349	ATP5H	chr17	73032145 - 73043080	10935
TC03001521.hg.1	-0.281136	9.54913	-4.23134	0.00242108	0.0300541	-1.39442	THOC7	chr3	63819546 - 63849597	30051
TC03001203.hg.1	-0.279936	8.61639	-3.69063	0.00536908	0.0450784	-2.20301	ZFYVE20	chr3	15111580 - 15140670	29090
TC03000534.hg.1	-0.279006	8.66615	-3.81507	0.00445385	0.0409583	-2.01358	ALCAM	chr3	105085557 - 105295757	210200
TC02000311.hg.1	-0.27868	10.9531	-5.8128	0.000299956	0.0122708	0.722168	ERLEC1	chr2	54014068 - 54045956	31888
TC12003262.hg.1	-0.278523	10.6979	-4.519	0.00161209	0.0246664	-0.98089	ARL6IP4	chr12	123464607 - 123467460	2853
TC14002245.hg.1	-0.278513	8.25715	-3.77111	0.0047567	0.0425616	-2.08029	IGHV1-3	chr14	106471246 - 106471723	477
TC14002313.hg.1	-0.278018	9.44545	-6.01098	0.000236618	0.0114002	0.960409	APOPT1, KLC1	chr14	104029299 - 104073860	44561
TC13000602.hg.1	-0.277812	8.86445	-3.73979	0.00498569	0.0436809	-2.12795	MTRF1	chr13	41790516 - 41837742	47226
TC17001812.hg.1	-0.277537	11.2347	-4.02251	0.00327707	0.035178	-1.70211	HELZ	chr17	65066554 - 65241319	174765
TC18000011.hg.1	-0.277317	11.2301	-3.5854	0.00629831	0.0489461	-2.36459	SMCHD1	chr18	2655886 - 2805015	149129
TC16000366.hg.1	-0.276387	9.42665	-6.21058	0.000187293	0.0100935	1.19452	STX4	chr16	31044319 - 31051489	7170
TC10001621.hg.1	-0.276186	10.2812	-5.36054	0.000525654	0.0152746	0.156248	CUEDC2	chr10	104183002 - 104192423	9421
TC19000872.hg.1	-0.275457	10.6064	-5.71037	0.00033977	0.0126298	0.59672	PRPF31	chr19	54618790 - 54635150	16360
TC19001628.hg.1	-0.273093	10.3287	-3.64361	0.00576493	0.0469919	-2.27505	SNRPD2	chr19	46190712 - 46195443	4731
TC12000063.hg.1	-0.272094	8.03489	-4.68576	0.00128057	0.0223875	-0.746845	DYRK4	chr12	4671370 - 4723325	51955
TC14002341.hg.1	-0.272092	9.05176	-4.00584	0.00335812	0.0354775	-1.72693	CHMP4A	chr14	24678787 - 24685276	6489
TC06000427.hg.1	-0.271593	11.9533	-5.78724	0.000309393	0.0123509	0.691006	ITPR3	chr6	33588522 - 33664351	75829
TC0X002321.hg.1	-0.271484	8.16991	-4.01254	0.00332528	0.0353323	-1.71695	TCEAL1	chrX	102883632 - 102885881	2249
TC13000502.hg.1	-0.271431	9.24888	-3.84916	0.00423314	0.0396913	-1.96202	RNF6	chr13	26706253 - 26796791	90538
TC01002576.hg.1	-0.271121	8.6964	-5.89017	0.000273262	0.0119299	0.815869	CCDC23	chr1	43272723 - 43283059	10336
TC08001286.hg.1	-0.269906	8.31526	-4.06977	0.00305841	0.0339222	-1.63195	MYBL1	chr8	67474410 - 67525529	51119
TC15002795.hg.1	-0.269904	8.89486	-5.03569	0.000800425	0.0182777	-0.269684	C15orf63	chr15	44088340 - 44095241	6901
TC01001758.hg.1	-0.269229	9.50161	-3.95768	0.00360455	0.0367886	-1.79885	TRAF5	chr1	211499957 - 211548288	48331
TC17000543.hg.1	-0.268669	9.46955	-5.46372	0.000461364	0.0145174	0.288114	RUNDC1	chr17	41132582 - 41145707	13125
TC19001094.hg.1	-0.268127	11.7255	-4.12772	0.00281129	0.0323239	-1.54633	GTF2F1	chr19	6379580 - 6393471	13891
TC03002161.hg.1	-0.2674	10.3594	-4.61969	0.00140219	0.0233523	-0.839065	RNF168	chr3	196195654 - 196230639	34985
TC18000166.hg.1	-0.265893	11.5613	-4.61778	0.00140588	0.023369	-0.841743	HAUS1	chr18	43684298 - 43708299	24001
TC02000582.hg.1	-0.26579	12.1142	-4.44213	0.00179502	0.0260206	-1.09019	NCAPH	chr2	97001484 - 97041274	39790
TC01006297.hg.1	-0.265403	10.9443	-4.04672	0.00316304	0.0344367	-1.66613	CDK11A, CDK11B	chr1	1634169 - 1655966	21797
TC08001432.hg.1	-0.264299	7.90669	-4.50304	0.00164834	0.0249445	-1.0035	GEM	chr8	95261481 - 95274578	13097
TC14000552.hg.1	-0.263463	12.2744	-4.71951	0.00122287	0.0217871	-0.699996	PSMC1	chr14	90722839 - 90738969	16130
TC12001984.hg.1	-0.263327	11.6604	-4.42274	0.00184462	0.0263196	-1.1179	DDX54	chr12	113594978 - 113623284	28306
TC07000520.hg.1	-0.262583	10.7805	-3.82029	0.00441929	0.0407711	-2.00568	DMTF1	chr7	86781677 - 86825648	43971
TC01002137.hg.1	-0.26241	10.459	-3.76289	0.00481567	0.0428449	-2.09278	CEP104	chr1	3728645 - 3773797	45152
TC15000827.hg.1	-0.262037	11.1139	-3.86119	0.00415802	0.0392755	-1.94385	AKAP13	chr15	85777817 - 86292586	514769
TC02000400.hg.1	-0.261181	9.64346	-5.35909	0.000526619	0.0152746	0.154392	ARHGAP25	chr2	68906733 - 69053965	147232
TC13000539.hg.1	-0.260943	11.4329	-3.60119	0.00614865	0.0481413	-2.34026	HSPH1	chr13	31710762 - 31736525	25763
TC16000157.hg.1	-0.259196	10.1993	-4.63221	0.00137822	0.0233523	-0.821544	NUBP1	chr16	10837678 - 10863208	25530
TC02001644.hg.1	-0.258943	10.8615	-4.75271	0.00116885	0.021619	-0.654086	SF3B14	chr2	24290454 - 24299314	8860
TC06000094.hg.1	-0.258933	11.3419	-4.91796	0.00093566	0.0194505	-0.428092	NOL7	chr6	13615559 - 13632971	17412
TC19000619.hg.1	-0.257524	8.1664	-3.71882	0.00514556	0.0444042	-2.15994	ZNF234	chr19	44645710 - 44680495	34785
TC07000609.hg.1	-0.256991	10.0292	-4.56245	0.00151764	0.0241434	-0.919501	COPS6	chr7	99686577 - 99689823	3246
TC03000930.hg.1	-0.256643	9.71605	-3.86776	0.00411759	0.039071	-1.93394	ECT2	chr3	172468472 - 172539264	70792
TC11000985.hg.1	-0.256067	9.57173	-4.07078	0.00305388	0.0339222	-1.63044	ZC3H12C	chr11	109963926 - 110042566	78640
TC20000140.hg.1	-0.25597	11.5916	-4.62812	0.001386	0.0233523	-0.827265	XRN2	chr20	21283942 - 21370463	86521
TC04001000.hg.1	-0.255258	9.41912	-3.80721	0.00450649	0.041135	-2.0255	JAKMIP1	chr4	6027926 - 6202318	174392
TC17001907.hg.1	-0.254555	9.8425	-4.29048	0.00222469	0.028711	-1.30841	JMJD6	chr17	74708914 - 74722881	13967
TC10002941.hg.1	-0.254036	8.62872	-4.44365	0.0017912	0.0260206	-1.08802	STAMBPL1	chr10	90639491 - 90734910	95419
TC08000415.hg.1	-0.254021	8.99681	-3.78	0.00469376	0.0422227	-2.06678	KRT8	chr8	62491130 - 62492230	1100
TC05002101.hg.1	-0.253608	9.78149	-4.11786	0.00285177	0.032555	-1.56086	UIMC1	chr5	176332006 - 176449634	117628
TC09000217.hg.1	-0.253244	8.47478	-5.40055	0.000499634	0.014906	0.207582	TRMT10B	chr9	37753802 - 37778969	25167
TC14002343.hg.1	-0.252615	10.0074	-4.68787	0.00127689	0.0223875	-0.743921	NEDD8	chr14	24686057 - 24701660	15603
TC01001790.hg.1	-0.252489	8.85324	-3.58044	0.00634602	0.0491998	-2.37222	SMYD2	chr1	214454444 - 214510477	56033
TC03001644.hg.1	-0.25218	12.5537	-3.93171	0.00374536	0.0373787	-1.83776	ZBED2	chr3	111311747 - 111314290	2543
TC15000157.hg.1	-0.251525	9.45834	-5.42861	0.000482222	0.0147702	0.243435	GOLGA8J	chr15	30375158 - 30385702	10544
TC02002267.hg.1	-0.25105	10.6573	-6.06287	0.000222557	0.0109243	1.02183	MKI67IP	chr2	122484521 - 122494503	9982
TC04000332.hg.1	-0.249187	12.4478	-5.28793	0.000576704	0.0160373	0.0624741	SRP72	chr4	57333081 - 57369847	36766
TC02001022.hg.1	-0.249107	10.6386	-4.12056	0.00284062	0.0325298	-1.55688	DYNC1I2	chr2	172543919 - 172604930	61011
TC01002549.hg.1	-0.24877	9.09535	-3.64245	0.00577515	0.0469919	-2.27684	TRIT1	chr1	40306706 - 40349183	42477
TC01000355.hg.1	-0.248667	11.2974	-4.03922	0.00319792	0.0345987	-1.67727	NUDC	chr1	27226729 - 27273353	46624
TC11002334.hg.1	-0.247567	10.921	-5.56377	0.000407116	0.0137958	0.414412	PCSK7	chr11	117075053 - 117103241	28188
TC11002274.hg.1	-0.24753	10.9301	-3.67757	0.00547609	0.0457137	-2.223	RDX	chr11	110045605 - 110167447	121842
TC12000197.hg.1	-0.246493	9.46747	-3.56983	0.00644959	0.0497515	-2.38859	H2AFJ	chr12	14927270 - 14930936	3666
TC14000438.hg.1	-0.245383	11.5677	-3.60353	0.00612684	0.0481017	-2.33667	RBM25	chr14	73525144 - 73588122	62978
TC06002240.hg.1	-0.245378	9.73252	-4.38765	0.00193813	0.0269714	-1.16818	FBXO5	chr6	153291658 - 153304740	13082
TC19002678.hg.1	-0.245279	9.51294	-5.51074	0.000434946	0.0141926	0.347667	ZNF653	chr19	11594242 - 11616738	22496
TC19001165.hg.1	-0.24521	12.1754	-4.11437	0.00286626	0.0326213	-1.56601	CDC37	chr19	10501809 - 10514271	12462
TC0X000101.hg.1	-0.243977	11.2676	-4.0295	0.00324372	0.0348851	-1.69172	SMS	chrX	21958691 - 22025798	67107
TC07000030.hg.1	-0.243828	10.1072	-4.31193	0.00215773	0.0282919	-1.27733	EIF3B	chr7	2393721 - 2420380	26659
TC12001115.hg.1	-0.243819	9.43791	-5.10072	0.000734924	0.0175371	-0.183109	EFCAB4B	chr12	3716318 - 3873985	157667
TC07000597.hg.1	-0.243722	8.659	-4.07909	0.00301712	0.0336779	-1.61814	ZKSCAN5	chr7	99101607 - 99132323	30716
TC15001297.hg.1	-0.24335	8.85316	-4.67111	0.00130651	0.0227029	-0.767233	PATL2	chr15	44957930 - 45003514	45584
TC11001017.hg.1	-0.242324	8.24326	-3.68066	0.0054505	0.0455936	-2.21826	TTC12	chr11	113185251 - 113254266	69015
TC04000542.hg.1	-0.241615	9.99251	-4.12925	0.00280507	0.032316	-1.54408	TET2	chr4	106067032 - 106200973	133941
TC01002916.hg.1	-0.24135	11.3846	-3.87011	0.00410326	0.039071	-1.9304	SASS6	chr1	100549102 - 100598511	49409
TC18000020.hg.1	-0.241071	8.76294	-3.79252	0.00460656	0.0418599	-2.04777	FLJ35776	chr18	3594112 - 3598350	4238
TC20001725.hg.1	-0.23964	11.5387	-4.37982	0.0019597	0.0271195	-1.17944	SNX5	chr20	17922241 - 17949623	27382
TC05000896.hg.1	-0.239513	8.492	-3.71605	0.00516706	0.0444658	-2.16416	PTTG1	chr5	159848829 - 159855748	6919
TC08001713.hg.1	-0.239497	9.59671	-4.70771	0.00124272	0.0219937	-0.716357	TOP1MT	chr8	144386554 - 144442149	55595
TC19000131.hg.1	-0.239463	8.35573	-5.25612	0.000600745	0.0163124	0.0211319	PET100	chr19	7694671 - 7696510	1839
TC05003434.hg.1	-0.238853	9.45315	-4.53778	0.00157051	0.0243768	-0.954318	HAVCR2	chr5	156512843 - 156536725	23882
TC03000992.hg.1	-0.238813	10.066	-5.26149	0.000596615	0.0162898	0.0281158	EIF2B5	chr3	183852810 - 184402546	549736
TC01002472.hg.1	-0.238731	9.18046	-5.46795	0.000458917	0.0145174	0.293488	ZBTB8OS	chr1	33065773 - 33116504	50731
TC08000731.hg.1	-0.238529	8.83092	-3.63807	0.00581364	0.0469919	-2.28356	NSMCE2	chr8	126103921 - 126379367	275446
TC07003347.hg.1	-0.237494	8.04777	-4.28504	0.00224202	0.0287897	-1.3163	COX19	chr7	1004486 - 1015235	10749
TC22000046.hg.1	-0.237377	10.4554	-3.66514	0.00557998	0.0460429	-2.24203	CDC45	chr22	19466982 - 19508135	41153
TC01001675.hg.1	-0.236901	10.1438	-3.71514	0.00517416	0.0444658	-2.16555	PPP1R12B	chr1	202317827 - 202557697	239870
TC12001993.hg.1	-0.23588	12.5684	-4.30324	0.00218458	0.0284056	-1.28991	RBM19	chr12	114254543 - 114404176	149633
TC20000789.hg.1	-0.232458	9.46469	-4.17227	0.00263584	0.0312706	-1.48082	GSS	chr20	33516236 - 33543620	27384
TC16000963.hg.1	-0.232317	10.6009	-5.53249	0.000423288	0.0140924	0.375096	GGA2	chr16	23474863 - 23521815	46952
TC09000938.hg.1	-0.232263	10.6453	-5.13531	0.000702462	0.0172773	-0.137317	RPS6	chr9	19375713 - 19380252	4539
TC01001626.hg.1	-0.230943	11.778	-5.0388	0.000797146	0.0182755	-0.265521	CDC73	chr1	193091088 - 193223942	132854
TC01001026.hg.1	-0.230353	10.9849	-3.74569	0.0049417	0.0435613	-2.11897	TTF2	chr1	117602925 - 117645492	42567
TC0X000231.hg.1	-0.22992	9.62986	-3.88993	0.00398427	0.0385538	-1.90053	USP11	chrX	47092089 - 47107727	15638
TC05001864.hg.1	-0.229598	9.26528	-3.70922	0.00522053	0.044506	-2.17459	DND1	chr5	140050379 - 140053171	2792
TC16000260.hg.1	-0.229123	11.0527	-3.99719	0.003401	0.0356542	-1.73982	PRKCB	chr16	23847300 - 24231932	384632
TC18000377.hg.1	-0.228287	9.95808	-3.97517	0.00351287	0.0363502	-1.77269	PTPN2	chr18	12785477 - 12884337	98860
TC17000402.hg.1	-0.228213	11.1785	-3.80685	0.00450887	0.041135	-2.02603	TAF15	chr17	34136486 - 34174238	37752
TC06001044.hg.1	-0.227683	10.828	-4.99499	0.000844621	0.0187284	-0.324205	VTA1	chr6	142468367 - 142542085	73718
TC07000267.hg.1	-0.226659	9.32675	-3.90722	0.00388347	0.0382552	-1.87452	BLVRA	chr7	43798272 - 43846941	48669
TC06001741.hg.1	-0.226621	10.1079	-3.85883	0.00417264	0.0393489	-1.94741	MEA1	chr6	42948082 - 42981706	33624
TC20001021.hg.1	-0.22618	10.3565	-3.57623	0.00638693	0.0494008	-2.37872	DIDO1	chr20	61509090 - 61569304	60214
TC14000968.hg.1	-0.226103	11.2324	-3.93803	0.00371052	0.0373458	-1.82827	PSME2	chr14	24612571 - 24616430	3859
TC21000137.hg.1	-0.22601	8.19978	-3.75641	0.00486272	0.0431792	-2.10264	FAM165B	chr21	35747749 - 35780164	32415
TC11000304.hg.1	-0.225128	8.28147	-3.56021	0.00654502	0.0499481	-2.40345	RCN1, DKFZp686K1684	chr11	31837932 - 32127301	289369
TC07001043.hg.1	-0.224357	11.0202	-3.95386	0.00362489	0.0367886	-1.80457	RBM33	chr7	155437145 - 155574179	137034
TC08000010.hg.1	-0.222668	7.87421	-4.08558	0.00298877	0.0334265	-1.60855	ARHGEF10	chr8	1772142 - 1906807	134665
TC08001109.hg.1	-0.221703	10.3177	-4.48534	0.0016896	0.0252693	-1.02864	GTF2E2	chr8	30435835 - 30515768	79933
TC16000661.hg.1	-0.221214	9.47107	-4.46808	0.00173088	0.0256761	-1.05319	KIAA0513	chr16	85061375 - 85127828	66453
TC20000469.hg.1	-0.220758	7.90853	-3.85157	0.00421798	0.0396087	-1.95838	ZNF831	chr20	57766075 - 57834168	68093
TC04001446.hg.1	-0.220074	9.9341	-3.73733	0.00500417	0.0437762	-2.1317	INTS12	chr4	106603784 - 106817143	213359
TC05002112.hg.1	-0.219773	11.5108	-3.56725	0.00647499	0.049847	-2.39257	DDX41	chr5	176938578 - 176944470	5892
TC06001675.hg.1	-0.219667	10.9084	-3.92773	0.00376741	0.037503	-1.84372	STK38	chr6	36461669 - 36515256	53587
TC05001949.hg.1	-0.219377	10.0703	-4.83746	0.00104227	0.0206595	-0.537658	CCDC69	chr5	150560613 - 150603706	43093
TC08002599.hg.1	-0.218227	10.6098	-4.54368	0.00155768	0.0243605	-0.945977	FNTA	chr8	42911296 - 42940932	29636
TC02001419.hg.1	-0.218087	10.3259	-5.07621	0.000758897	0.0176451	-0.215654	DGKD	chr2	234263153 - 234380750	117597
TC17001372.hg.1	-0.217947	9.78859	-3.96387	0.00357182	0.036565	-1.78959	SLFN12L	chr17	33800708 - 33864880	64172
TC19001269.hg.1	-0.217763	10.1941	-4.89734	0.000961801	0.019657	-0.456066	HAUS8	chr19	17160571 - 17186343	25772
TC02000925.hg.1	-0.217714	7.99269	-4.3535	0.00203406	0.027551	-1.21731	MBD5	chr2	148778580 - 149275805	497225
TC07003332.hg.1	-0.216524	9.22955	-3.89374	0.00396186	0.0385412	-1.89481	TRIM74, TRIM73	chr7	75024337 - 75034896	10559
TC13000030.hg.1	-0.216503	10.7983	-4.03384	0.00322318	0.0347619	-1.68527	SAP18	chr13	21714653 - 21723224	8571
TC10000449.hg.1	-0.216427	11.0499	-3.67251	0.00551809	0.0458616	-2.23074	DDIT4	chr10	74033677 - 74035797	2120
TC10000067.hg.1	-0.215507	11.3648	-4.59989	0.00144101	0.023551	-0.866826	ATP5C1	chr10	7830092 - 7849778	19686
TC02002859.hg.1	-0.214747	12.6364	-3.69869	0.00530414	0.0447757	-2.19069	NCL	chr2	232318242 - 232348352	30110
TC19000169.hg.1	-0.213963	10.5096	-3.75575	0.0048676	0.0431792	-2.10365	PPAN-P2RY11, P2RY11, PPAN	chr19	10216899 - 10226064	9165
TC06002144.hg.1	-0.213132	8.20356	-4.07147	0.00305082	0.0339222	-1.62942	MAP7	chr6	136663419 - 136871957	208538
TC11000645.hg.1	-0.212111	9.32266	-3.67609	0.00548835	0.0457137	-2.22527	CTSW	chr11	65647280 - 65651212	3932
TC03001533.hg.1	-0.21204	9.86866	-3.62351	0.0059435	0.04755	-2.30592	SUCLG2	chr3	67410884 - 67705038	294154
TC12000612.hg.1	-0.211977	11.1224	-4.24568	0.00237182	0.0297859	-1.37352	YEATS4	chr12	69753483 - 69784576	31093
TC06002335.hg.1	-0.208973	10.6425	-4.14529	0.00274066	0.0319586	-1.52046	PHF10	chr6	170104001 - 170124151	20150
TC19000444.hg.1	-0.207773	11.8169	-4.34138	0.0020693	0.0279295	-1.23478	UBA2	chr19	34919264 - 34960798	41534
TC0X001414.hg.1	-0.207727	11.6938	-3.86302	0.00414672	0.0392333	-1.94109	MAP7D3	chrX	135295379 - 135338641	43262
TC08001564.hg.1	-0.207654	8.10156	-4.36926	0.00198916	0.0273607	-1.19461	MRPL13	chr8	121393000 - 121457647	64647
TC02000514.hg.1	-0.206725	9.8926	-3.70087	0.00528674	0.0447483	-2.18736	RNF181	chr2	85822837 - 85824831	1994
TC21000189.hg.1	-0.206273	8.41055	-4.49109	0.00167607	0.0251981	-1.02046	MX1	chr21	42792231 - 42831141	38910
TC01002144.hg.1	-0.205672	8.57617	-3.88564	0.00400971	0.0386953	-1.90699	CHD5	chr1	6161847 - 6240194	78347
TC19000194.hg.1	-0.204261	8.1896	-4.31939	0.00213495	0.0282187	-1.26654	CCDC159	chr19	11457181 - 11465620	8439
TC09000378.hg.1	-0.204202	8.49373	-4.2407	0.0023888	0.0298886	-1.38077	IDNK, C9orf103	chr9	86237872 - 86259045	21173
TC17001898.hg.1	-0.203987	10.2563	-5.44504	0.00047234	0.0146095	0.26436	UBE2O	chr17	74385613 - 74449288	63675
TC12001539.hg.1	-0.203447	9.77502	-3.56936	0.00645423	0.0497539	-2.38932	KRT8	chr12	53290971 - 53343650	52679
TC09000679.hg.1	-0.203083	8.20798	-3.9976	0.00339899	0.0356542	-1.73922	DNM1	chr9	130965658 - 131017527	51869
TC05002059.hg.1	-0.202663	11.0136	-3.74384	0.00495544	0.0436134	-2.12178	STK10	chr5	171469074 - 171615390	146316
TC16000045.hg.1	-0.202167	10.9538	-3.71039	0.00521135	0.044506	-2.17281	MAPK8IP3	chr16	1756194 - 1820318	64124
TC0X001024.hg.1	-0.20186	10.6317	-5.29946	0.00056825	0.0159583	0.0774191	GRIPAP1	chrX	48830134 - 48858675	28541
TC20001733.hg.1	-0.201433	10.5915	-3.86747	0.00411936	0.039071	-1.93437	STX16	chr20	57226309 - 57254582	28273
TC04002947.hg.1	-0.201367	8.13015	-4.56451	0.0015133	0.0241413	-0.916592	BDH2	chr4	103998782 - 104021040	22258
TC07001077.hg.1	-0.199428	8.9968	-3.85721	0.00418269	0.0394113	-1.94986	C7orf50	chr7	1036623 - 1177896	141273
TC03001705.hg.1	-0.197791	8.55296	-3.70267	0.00527235	0.0447383	-2.1846	PARP9	chr3	122246760 - 122283523	36763
TC01001205.hg.1	-0.197417	10.1449	-4.13067	0.00279932	0.032316	-1.54199	PSMD4	chr1	151227179 - 151239955	12776
TC22000711.hg.1	-0.197277	11.3588	-4.19666	0.00254478	0.0308979	-1.44508	EIF3D	chr22	36906897 - 36925483	18586
TC22001461.hg.1	-0.197157	8.3211	-4.65617	0.00133356	0.022999	-0.788061	SEC14L2	chr22	30792846 - 30821291	28445
TC07000191.hg.1	-0.196267	7.9452	-3.62316	0.00594671	0.04755	-2.30647	PLEKHA8	chr7	30067020 - 30170096	103076
TC20000109.hg.1	-0.195367	10.3992	-3.68678	0.00540039	0.0452435	-2.2089	DSTN	chr20	17550508 - 17588887	38379
TC01003618.hg.1	-0.195315	8.64308	-3.73458	0.00502492	0.0437908	-2.13589	ARPC5	chr1	183604064 - 183604997	933
TC11000330.hg.1	-0.194201	9.7322	-3.93237	0.00374167	0.0373787	-1.83676	PDHX	chr11	34937677 - 35042138	104461
TC02005037.hg.1	-0.193066	8.73723	-3.90467	0.00389817	0.0383015	-1.87836	ANKRD23	chr2	97490263 - 97509771	19508
TC11001724.hg.1	-0.192983	11.4791	-4.00377	0.00336832	0.035494	-1.73001	CKAP5	chr11	46764598 - 46867859	103261
TC16000358.hg.1	-0.187877	10.6208	-3.81163	0.00447677	0.041027	-2.01879	RNF40	chr16	30772933 - 30787628	14695
TC01003233.hg.1	-0.187643	10.5519	-4.14067	0.00275904	0.0320753	-1.52726	MRPL9	chr1	151732119 - 151741977	9858
TC11002011.hg.1	-0.18759	11.8847	-3.62053	0.0059705	0.0475599	-2.31051	MRPL21	chr11	68658744 - 68671303	12559
TC07001121.hg.1	-0.18725	10.233	-4.06386	0.00308486	0.0340699	-1.6407	RNF216	chr7	5659672 - 5821370	161698
TC19000427.hg.1	-0.185307	11.3206	-4.38755	0.00193841	0.0269714	-1.16833	PDCD5	chr19	33072094 - 33078358	6264
TC07000650.hg.1	-0.18256	9.61175	-4.06053	0.0030999	0.0341703	-1.64564	CUX1	chr7	101459184 - 101927250	468066
TC20000235.hg.1	-0.182433	12.5891	-3.60136	0.00614702	0.0481413	-2.33999	CHMP4B	chr20	32399110 - 32442173	43063
TC11001422.hg.1	-0.181922	8.66267	-4.39053	0.00193029	0.0269714	-1.16406	GALNTL4	chr11	11292421 - 11643561	351140
TC21000265.hg.1	-0.180504	8.76759	-3.89357	0.00396283	0.0385412	-1.89506	PRMT2	chr21	48055079 - 48085155	30076
TC05003404.hg.1	-0.18013	10.853	-3.57109	0.00643721	0.0497072	-2.38665	BRD9	chr5	863850 - 892939	29089
TC06002265.hg.1	-0.179547	12.3185	-3.7879	0.00463849	0.041967	-2.05477	EZR	chr6	159186773 - 159240456	53683
TC19001832.hg.1	-0.177414	9.27588	-3.72813	0.00507397	0.0440844	-2.14574	TFPT	chr19	54610320 - 54619055	8735
TC20000779.hg.1	-0.173453	12.3291	-3.72261	0.00511627	0.0442511	-2.15415	EIF2S2	chr20	32676104 - 32700138	24034
TC19000190.hg.1	-0.1734	12.0532	-3.61746	0.00599838	0.0476139	-2.31522	SMARCA4	chr19	11071598 - 11172958	101360
TC22000337.hg.1	-0.173207	10.8896	-3.93659	0.00371846	0.0373668	-1.83044	ACO2	chr22	41865117 - 41924993	59876
TC09000634.hg.1	-0.172553	9.92152	-4.44155	0.00179648	0.0260206	-1.09101	NEK6	chr9	127019885 - 127115586	95701
TC02004927.hg.1	-0.170673	10.1196	-4.22466	0.00244439	0.0302049	-1.40416	DCTN1	chr2	74588281 - 74619214	30933
TC22000703.hg.1	-0.16979	12.703	-4.29887	0.00219823	0.0284976	-1.29624	MYH9	chr22	36677323 - 36784063	106740
TC20000127.hg.1	-0.169737	11.2712	-3.66871	0.00554991	0.0459929	-2.23656	DTD1	chr20	18568537 - 18744561	176024
TC10001585.hg.1	-0.169004	8.15332	-3.76789	0.00477973	0.0426573	-2.08519	DNMBP	chr10	101635334 - 101769676	134342
TC19001028.hg.1	-0.16692	10.2265	-4.10136	0.00292093	0.0329079	-1.58521	LSM7	chr19	2321520 - 2328614	7094
TC05000006.hg.1	-0.165892	10.0255	-3.80907	0.00449394	0.0411294	-2.02267	EXOC3	chr5	443273 - 472052	28779
TC15001828.hg.1	-0.165887	10.249	-4.42463	0.00183971	0.0263196	-1.11519	POLG	chr15	89859534 - 89878092	18558
TC20000733.hg.1	-0.165048	8.28919	-3.59112	0.00624364	0.04862	-2.35577	NINL	chr20	25433333 - 25566153	132820
TC02002244.hg.1	-0.161887	11.261	-3.72474	0.00509989	0.0441918	-2.1509	CCDC93	chr2	118673054 - 118771739	98685
TC10001007.hg.1	-0.15949	13.2585	-4.44445	0.00178919	0.0260206	-1.08688	IL2RA	chr10	6052652 - 6104333	51681
TC07000829.hg.1	-0.151874	8.78058	-3.60518	0.00611145	0.0480138	-2.33412	EXOC4	chr7	132937823 - 133751342	813519
TC01000564.hg.1	-0.149807	10.8222	-3.68196	0.00543987	0.0455411	-2.21628	RPS8	chr1	45240923 - 45244451	3528
TC22000129.hg.1	-0.143936	9.55937	-3.61219	0.00604667	0.0478324	-2.32334	BCR	chr22	23521891 - 23660224	138333
TC14002197.hg.1	-0.142967	11.7187	-3.62003	0.005975	0.0475599	-2.31127	HIF1A	chr14	62162119 - 62214977	52858
TC17001305.hg.1	0.140112	8.03286	3.70888	0.00522322	0.044506	-2.17511	RAB34, NARR	chr17	27041299 - 27045447	4148
TC12000468.hg.1	0.142752	9.25191	3.69016	0.00537283	0.0450784	-2.20372	PDE1B	chr12	54943134 - 54973023	29889
TC01003225.hg.1	0.14413	9.22727	3.64036	0.00579346	0.0469919	-2.28005	RFX5	chr1	151313116 - 151319833	6717
TC0X000809.hg.1	0.149927	10.7972	3.66101	0.00561496	0.046265	-2.24836	PRKX	chrX	3522384 - 3631675	109291
TC11001228.hg.1	0.153095	8.24539	3.62242	0.00595338	0.04755	-2.3076	SIRT3	chr11	214625 - 236931	22306
TC12001543.hg.1	0.155463	8.56028	3.82414	0.00439394	0.0405697	-1.99984	CSAD	chr12	53551447 - 53575135	23688
TC09001686.hg.1	0.156837	9.56768	3.88563	0.00400976	0.0386953	-1.90701	MED22	chr9	136205160 - 136214986	9826
TC17000795.hg.1	0.156897	11.233	3.89129	0.00397626	0.0385412	-1.89849	NOL11	chr17	65714059 - 65740318	26259
TC16001246.hg.1	0.158372	8.35256	3.84578	0.00425449	0.0398265	-1.96712	FTSJD1	chr16	71316203 - 71323513	7310
TC15001559.hg.1	0.158819	7.92016	3.56426	0.00650467	0.0499481	-2.39719	UBAP1L	chr15	65385338 - 65407535	22197
TC11000085.hg.1	0.15897	9.20896	3.69747	0.00531387	0.0448129	-2.19254	PGAP2	chr11	3818954 - 3847601	28647
TC17000826.hg.1	0.159061	8.7959	4.0079	0.00334797	0.0354422	-1.72386	TTYH2	chr17	72209653 - 72258157	48504
TC10001317.hg.1	0.159527	12.1631	3.6929	0.00535066	0.045024	-2.19953	CCDC6	chr10	61548506 - 61666414	117908
TC02002947.hg.1	0.160526	9.44446	3.62383	0.0059406	0.04755	-2.30543	PASK	chr2	242045514 - 242089679	44165
TC01000598.hg.1	0.162757	10.5283	3.7401	0.00498338	0.0436809	-2.12748	CMPK1	chr1	47799469 - 47844511	45042
TC09000259.hg.1	0.169487	9.43741	3.94456	0.00367496	0.0371572	-1.8185	FAM27C	chr9	44990236 - 44991492	1256
TC10000703.hg.1	0.171925	9.16249	3.83299	0.00433634	0.0403297	-1.98646	ZFYVE27	chr10	99496878 - 99520664	23786
TC22000567.hg.1	0.17273	8.31561	3.93413	0.00373196	0.0373787	-1.83412	VPREB3	chr22	24094930 - 24096655	1725
TC03001166.hg.1	0.173942	9.21295	4.03837	0.00320187	0.0345987	-1.67853	VGLL4	chr3	11597544 - 11766453	168909
TC01003295.hg.1	0.174003	11.6544	3.75052	0.00490595	0.0433459	-2.11161	ADAR	chr1	154554534 - 154600475	45941
TC14001316.hg.1	0.17426	8.46203	4.01366	0.00331984	0.0353072	-1.71528	ACYP1	chr14	75519924 - 75536186	16262
TC04000281.hg.1	0.174391	9.01871	3.61343	0.00603523	0.0478073	-2.32142	OCIAD1	chr4	48807229 - 48863834	56605
TC06004128.hg.1	0.174865	8.46506	3.70106	0.00528519	0.0447483	-2.18706	HLA-DMA	chr6	32916390 - 32938493	22103
TC08001479.hg.1	0.176752	8.38029	4.02982	0.00324217	0.0348851	-1.69123	ANKRD46	chr8	101521980 - 101572012	50032
TC11002439.hg.1	0.17681	11.0494	3.7077	0.00523254	0.0445522	-2.17692	ETS1	chr11	128328656 - 128457453	128797
TC07001835.hg.1	0.17695	10.3059	3.62187	0.00595831	0.04755	-2.30844	ZNF800	chr7	126986844 - 127071978	85134
TC02002044.hg.1	0.177014	8.33404	3.57365	0.00641206	0.0495619	-2.38269	TMEM150A	chr2	85825670 - 85830319	4649
TC18000578.hg.1	0.178003	8.5468	4.17883	0.00261101	0.0311423	-1.4712	ZADH2	chr18	72907063 - 72921303	14240
TC09000266.hg.1	0.178776	9.68768	3.96122	0.00358577	0.0366424	-1.79355	FAM27A	chr9	45727029 - 45728283	1254
TC12000437.hg.1	0.180903	10.8478	4.16871	0.00264944	0.0312759	-1.48605	SP1	chr12	53773960 - 53810230	36270
TC17000975.hg.1	0.180948	8.57681	4.16433	0.00266625	0.031442	-1.49248	INPP5K	chr17	1397871 - 1420182	22311
TC05000775.hg.1	0.181171	9.13445	3.63914	0.00580416	0.0469919	-2.28191	KIAA0141	chr5	141303373 - 141321612	18239
TC01000945.hg.1	0.183165	8.01199	4.10683	0.00289783	0.0328444	-1.57714	CYB561D1	chr1	110036658 - 110045554	8896
TC20000942.hg.1	0.18385	11.7858	3.71222	0.00519702	0.044493	-2.17002	NFATC2	chr20	50003494 - 50179339	175845
TC20000169.hg.1	0.185022	9.09496	4.01372	0.00331955	0.0353072	-1.71519	GINS1	chr20	25388321 - 25433264	44943
TC02000465.hg.1	0.186267	7.89808	3.97282	0.00352505	0.036378	-1.7762	SEMA4F	chr2	74881355 - 74909186	27831
TC0X000255.hg.1	0.18824	10.194	3.91634	0.00383144	0.0379259	-1.86083	RBM3	chrX	48432741 - 48439553	6812
TC0X000711.hg.1	0.1898	9.01541	5.11009	0.000725969	0.0175178	-0.170681	CXorf40A	chrX	148621900 - 148632086	10186
TC16000616.hg.1	0.190743	8.36041	4.18194	0.00259934	0.0311	-1.46665	ZFP1	chr16	75182421 - 75206132	23711
TC01001298.hg.1	0.190774	8.19951	4.09581	0.00294461	0.0331261	-1.59342	HCN3	chr1	155247374 - 155259639	12265
TC09001664.hg.1	0.19093	8.69735	4.62527	0.00139146	0.0233523	-0.831259	FAM78A	chr9	134133463 - 134151934	18471
TC15000627.hg.1	0.191207	11.7961	4.32833	0.00210801	0.0281064	-1.25363	PIAS1	chr15	68346572 - 68480404	133832
TC09000448.hg.1	0.191577	10.6703	4.23002	0.00242567	0.0300553	-1.39635	FAM120A	chr9	96214002 - 96328397	114395
TC02001347.hg.1	0.191977	8.22938	4.27088	0.0022878	0.0291975	-1.33685	SGPP2	chr2	223289236 - 223425667	136431
TC19002697.hg.1	0.192878	9.31881	4.09499	0.0029481	0.0331329	-1.59462	ALKBH6	chr19	36500022 - 36505145	5123
TC09000170.hg.1	0.19421	7.90757	4.62564	0.00139073	0.0233523	-0.830729	NUDT2	chr9	34329504 - 34343711	14207
TC01003612.hg.1	0.194548	8.2401	3.73546	0.00501829	0.0437908	-2.13456	RN5S71	chr1	182913500 - 182913625	125
TC10001609.hg.1	0.194806	9.03114	3.94895	0.00365123	0.0369824	-1.81192	FBXW4	chr10	103370421 - 103455110	84689
TC11000746.hg.1	0.19571	9.61358	3.67282	0.00551552	0.0458616	-2.23027	RNF121	chr11	71639747 - 71708643	68896
TC12000841.hg.1	0.19681	8.44383	4.17341	0.00263151	0.0312706	-1.47915	USP30	chr12	109460894 - 109525831	64937
TC01000839.hg.1	0.19799	9.34774	3.87923	0.00404806	0.0389088	-1.91665	LRRC8C	chr1	90098631 - 90235462	136831
TC19000976.hg.1	0.19838	12.4301	4.03239	0.00323001	0.0348029	-1.68741	FLJ45445	chr19	197016 - 202209	5193
TC17000704.hg.1	0.198707	9.13217	4.05849	0.00310914	0.0342065	-1.64867	AKAP1	chr17	55162551 - 55198710	36159
TC12000089.hg.1	0.199237	9.5515	4.1294	0.00280447	0.032316	-1.54386	COPS7A	chr12	6832907 - 6841041	8134
TC13000292.hg.1	0.199843	7.81029	4.58633	0.00146826	0.0238199	-0.885876	CLN5	chr13	77564795 - 77576652	11857
TC11001214.hg.1	0.20044	9.80157	4.85873	0.00101289	0.0203071	-0.508617	VPS26B	chr11	134094499 - 134117686	23187
TC10000452.hg.1	0.201316	8.94518	3.64354	0.00576557	0.0469919	-2.27516	MCU	chr10	74451889 - 74647452	195563
TC01001586.hg.1	0.201907	11.8063	4.91255	0.000942448	0.0195044	-0.435429	SMG7	chr1	183441506 - 183567381	125875
TC11001560.hg.1	0.202585	8.73578	3.65206	0.00569158	0.0465955	-2.26208	TRAF6	chr11	36505317 - 36531863	26546
TC07003327.hg.1	0.203797	8.48602	3.73591	0.00501492	0.0437908	-2.13387	KCTD7, RABGEF1	chr7	66093868 - 66108216	14348
TC05001986.hg.1	0.20507	11.8376	5.24339	0.000610676	0.0163502	0.00453268	ADAM19	chr5	156822542 - 157002783	180241
TC06000525.hg.1	0.205693	10.5042	5.42038	0.000487262	0.0147765	0.232926	BRPF3	chr6	36164521 - 36200567	36046
TC02001521.hg.1	0.209046	8.69785	4.09027	0.00296844	0.0333089	-1.60161	TSSC1	chr2	3192696 - 3381653	188957
TC0X000382.hg.1	0.209297	11.3943	4.0206	0.00328623	0.0352387	-1.70495	MED12	chrX	70338406 - 70362304	23898
TC04001521.hg.1	0.209322	8.14022	4.1153	0.00286239	0.0326164	-1.56463	IL21	chr4	123533783 - 123542224	8441
TC01006345.hg.1	0.209654	9.59251	4.6234	0.00139503	0.0233523	-0.833867	SLC35E2	chr1	1656277 - 1677438	21161
TC12000920.hg.1	0.209776	8.77895	4.35934	0.00201729	0.0273607	-1.20889	FBXW8	chr12	117348761 - 117470180	121419
TC01006344.hg.1	0.210322	9.66237	5.26885	0.000590996	0.0162397	0.0376957	SLC35E2B	chr1	1590988 - 1624243	33255
TC12000604.hg.1	0.210435	7.78557	4.32364	0.0021221	0.0281136	-1.2604	SLC35E3	chr12	69139886 - 69187508	47622
TC01006371.hg.1	0.21102	10.9806	5.41615	0.000489874	0.0147765	0.227523	VPS72	chr1	151148780 - 151167797	19017
TC21000391.hg.1	0.211123	11.4101	4.57813	0.00148502	0.0239227	-0.897412	SCAF4	chr21	33043313 - 33104431	61118
TC02001455.hg.1	0.212416	8.47397	5.22934	0.000621837	0.0163819	-0.0138072	ASB1	chr2	239335383 - 239360891	25508
TC03001447.hg.1	0.212778	8.29168	4.04176	0.00318605	0.0345987	-1.67349	POC1A	chr3	52109249 - 52188706	79457
TC01001267.hg.1	0.213877	11.8713	4.47712	0.00170913	0.0254949	-1.04033	UBAP2L	chr1	154192655 - 154243986	51331
TC14002331.hg.1	0.214083	10.9524	4.97291	0.000869689	0.0188833	-0.353883	FOXN3	chr14	89622516 - 90085494	462978
TC16000485.hg.1	0.21432	10.1456	3.74046	0.00498071	0.0436809	-2.12694	ARL2BP	chr16	57279010 - 57287547	8537
TC14001225.hg.1	0.215045	9.94968	3.65525	0.00566415	0.046404	-2.25719	MAX	chr14	65472892 - 65569408	96516
TC05000818.hg.1	0.215514	8.44434	4.24197	0.00238444	0.0298666	-1.37892	GRPEL2	chr5	148724977 - 148734146	9169
TC04000828.hg.1	0.215849	8.50578	3.56794	0.00646822	0.0498283	-2.39151	MSMO1	chr4	166248775 - 166264314	15539
TC19000363.hg.1	0.217273	8.91656	4.58881	0.00146325	0.0237721	-0.882397	KLHL26	chr19	18747838 - 18781306	33468
TC01003195.hg.1	0.217481	9.45561	4.92779	0.000923474	0.0194505	-0.414784	SV2A	chr1	149874870 - 149889434	14564
TC18000368.hg.1	0.217828	8.0336	5.69298	0.000347084	0.0128187	0.575265	MPPE1	chr18	11883470 - 11908796	25326
TC11001932.hg.1	0.217994	8.37757	3.84335	0.0042699	0.0398687	-1.97079	SLC25A45	chr11	65142663 - 65151172	8509
TC16000536.hg.1	0.218043	8.96504	3.80461	0.00452401	0.0412076	-2.02943	SLC9A5	chr16	67282855 - 67306094	23239
TC07000888.hg.1	0.218154	7.98985	4.71802	0.00122536	0.0217871	-0.702061	TMEM178B	chr7	140774032 - 141180179	406147
TC04002910.hg.1	0.219683	10.8207	4.28385	0.00224583	0.0287897	-1.31802	RNF4	chr4	2470456 - 2517586	47130
TC03001465.hg.1	0.219984	8.41959	3.59552	0.00620196	0.0483938	-2.34899	RFT1	chr3	53122499 - 53164478	41979
TC11000687.hg.1	0.220565	9.63262	4.0836	0.00299739	0.0334903	-1.61147	RAD9A	chr11	67159423 - 67165883	6460
TC02000368.hg.1	0.220986	9.45812	4.0176	0.00330073	0.0352735	-1.70942	AFTPH	chr2	64751439 - 64820139	68700
TC21000536.hg.1	0.221674	9.27893	4.72527	0.00121331	0.0217871	-0.692023	SUMO3	chr21	46225532 - 46238694	13162
TC17000058.hg.1	0.224526	9.03526	4.29549	0.00220885	0.0285708	-1.30114	ENO3	chr17	4851387 - 4860426	9039
TC17000399.hg.1	0.226003	11.7492	5.63868	0.000371047	0.0132879	0.507982	AP2B1	chr17	33914282 - 34053436	139154
TC07001145.hg.1	0.226173	7.97646	3.62154	0.00596134	0.04755	-2.30896	NDUFA4	chr7	10971578 - 10979883	8305
TC01001260.hg.1	0.2269	8.73822	4.51312	0.00162535	0.0247596	-0.989218	SNAPIN	chr1	153631130 - 153634326	3196
TC02001201.hg.1	0.22958	11.0197	4.28035	0.00225709	0.0288696	-1.32311	CTLA4	chr2	204732509 - 204738683	6174
TC17000907.hg.1	0.230277	10.1596	5.10169	0.000733991	0.0175371	-0.181822	ENGASE	chr17	77071019 - 77084681	13662
TC01002530.hg.1	0.230722	8.91736	3.74928	0.00491509	0.0433933	-2.11349	FHL3	chr1	38462442 - 38471278	8836
TC08001111.hg.1	0.231522	8.32938	3.56019	0.00654515	0.0499481	-2.40346	PPP2CB	chr8	30631973 - 30671830	39857
TC11001746.hg.1	0.23161	9.77169	3.64085	0.00578914	0.0469919	-2.27929	MTCH2	chr11	47638858 - 47664206	25348
TC03001380.hg.1	0.232011	8.94539	3.95375	0.00362548	0.0367886	-1.80473	SHISA5	chr3	48509197 - 48542259	33062
TC10002952.hg.1	0.232103	10.4062	3.83139	0.0043467	0.0403933	-1.98888	ARHGAP19	chr10	98978996 - 99052430	73434
TC0X000597.hg.1	0.232266	8.30589	5.00934	0.000828741	0.0185534	-0.30495	GLUD2	chrX	120181442 - 120183934	2492
TC06001593.hg.1	0.232336	8.81851	4.98521	0.000855625	0.0187353	-0.33734	LEMD2	chr6	33738979 - 33756913	17934
TC02001318.hg.1	0.232747	8.99994	3.95282	0.00363043	0.0368042	-1.80612	FAM134A	chr2	220040947 - 220050201	9254
TC07000276.hg.1	0.233587	10.0179	5.04373	0.00079199	0.0181936	-0.258939	OGDH	chr7	44646121 - 44748669	102548
TC08001485.hg.1	0.234047	10.3666	4.98024	0.000861277	0.018736	-0.34402	YWHAZ	chr8	101930804 - 101965623	34819
TC18000480.hg.1	0.23507	9.42768	3.78088	0.00468756	0.0422227	-2.06544	ATP5A1	chr18	43664110 - 43684300	20190
TC12002085.hg.1	0.235194	9.06531	3.87004	0.00410369	0.039071	-1.93051	CDK2AP1	chr12	123743581 - 123756881	13300
TC19001570.hg.1	0.235378	9.35088	3.7533	0.00488553	0.0432782	-2.10738	ERF	chr19	42751717 - 42759309	7592
TC20000906.hg.1	0.235641	8.3781	4.49815	0.00165965	0.0250495	-1.01045	TP53RK	chr20	45313004 - 45318418	5414
TC10000469.hg.1	0.235871	9.42031	3.80795	0.00450148	0.0411329	-2.02437	FUT11	chr10	75532049 - 75538821	6772
TC16002067.hg.1	0.237256	9.95674	3.77042	0.0047616	0.0425616	-2.08133	HN1L	chr16	1728257 - 1752087	23830
TC12000340.hg.1	0.23903	8.12699	3.66303	0.00559781	0.0461568	-2.24526	SLC48A1	chr12	48152361 - 48176536	24175
TC14002300.hg.1	0.239735	8.45664	3.81759	0.00443714	0.0408373	-2.00977	FNTB, CHURC1-FNTB	chr14	65453438 - 65529373	75935
TC12000890.hg.1	0.241127	10.0278	5.44985	0.000469487	0.0146095	0.27048	TPCN1	chr12	113659243 - 113736390	77147
TC12000066.hg.1	0.241246	8.75842	3.84634	0.0042509	0.0398253	-1.96627	KCNA6, GALNT8	chr12	4918342 - 4960278	41936
TC0X001359.hg.1	0.241588	10.0907	3.62242	0.00595338	0.04755	-2.3076	ZNF280C	chrX	129336673 - 129402922	66249
TC12003258.hg.1	0.241615	9.71047	3.59632	0.00619439	0.0483676	-2.34776	GATC	chr12	120884241 - 120901556	17315
TC07000049.hg.1	0.241671	8.89793	3.97725	0.00350217	0.0363135	-1.76959	WIPI2	chr7	5229819 - 5273486	43667
TC01001823.hg.1	0.242188	8.50466	4.37144	0.00198304	0.0273567	-1.19148	HLX	chr1	221051699 - 221059124	7425
TC11000063.hg.1	0.244203	9.81422	3.56006	0.00654645	0.0499481	-2.40367	CD81	chr11	2397419 - 2418649	21230
TC0M000007.hg.1	0.245487	12.8684	3.59493	0.00620754	0.0484045	-2.3499	---	chrM	10473 - 12138	1665
TC22000849.hg.1	0.245623	10.2726	3.94757	0.00365868	0.0370252	-1.81399	POLDIP3	chr22	42979727 - 43010968	31241
TC08001405.hg.1	0.245687	7.90322	4.35154	0.00203972	0.0275951	-1.22014	TMEM64	chr8	91634223 - 91803860	169637
TC10001631.hg.1	0.247361	9.39334	3.95371	0.0036257	0.0367886	-1.80479	CALHM2	chr10	105206543 - 105212660	6117
TC20001729.hg.1	0.247376	8.95491	4.00094	0.00338236	0.0356093	-1.73423	TGIF2	chr20	35201876 - 35222560	20684
TC04000969.hg.1	0.24844	8.9362	4.30717	0.0021724	0.0283548	-1.28422	TMEM129	chr4	1717679 - 1723085	5406
TC02002166.hg.1	0.249238	10.0078	4.71355	0.00123286	0.0218866	-0.708263	TGFBRAP1	chr2	105880847 - 105946491	65644
TC16001339.hg.1	0.250177	10.1343	4.10103	0.00292234	0.0329079	-1.5857	CYBA	chr16	88709697 - 88717492	7795
TC12001470.hg.1	0.25024	12.5509	3.5765	0.00638427	0.0494008	-2.3783	TUBA1B	chr12	49521565 - 49525304	3739
TC12000010.hg.1	0.250453	11.4714	4.31007	0.00216347	0.0283103	-1.28003	WNK1	chr12	861759 - 1020618	158859
TC14000097.hg.1	0.250616	7.96786	3.92746	0.00376892	0.037503	-1.84413	TRAV8-1	chr14	22265459 - 22266058	599
TC02000069.hg.1	0.251034	7.97361	5.51575	0.000432229	0.0141845	0.353995	PQLC3	chr2	11295324 - 11319000	23676
TC16001342.hg.1	0.251335	9.75724	3.64621	0.00574227	0.0469436	-2.27106	RNF166	chr16	88762903 - 88772829	9926
TC05001758.hg.1	0.251363	9.59506	4.36511	0.00200087	0.0273607	-1.20058	HINT1	chr5	130494720 - 130507428	12708
TC10000168.hg.1	0.251653	9.337	3.86177	0.00415441	0.0392737	-1.94297	OTUD1	chr10	23728198 - 23731319	3121
TC07001883.hg.1	0.251685	9.39724	4.06243	0.00309132	0.0341084	-1.64283	AKR1B1	chr7	134127107 - 134144036	16929
TC20000337.hg.1	0.252017	10.668	4.73019	0.00120521	0.0217699	-0.685214	YWHAB	chr20	43514317 - 43537173	22856
TC09000442.hg.1	0.252049	8.81191	3.56049	0.00654221	0.0499481	-2.40301	C9orf89	chr9	95858450 - 95875565	17115
TC20000244.hg.1	0.252585	8.94306	3.80359	0.00453095	0.0412381	-2.03098	TP53INP2	chr20	33292094 - 33301243	9149
TC07000715.hg.1	0.253687	10.7382	4.64574	0.00135282	0.0231711	-0.802631	MDFIC	chr7	114562209 - 114659970	97761
TC16000363.hg.1	0.254314	8.31272	5.07672	0.000758396	0.0176451	-0.214984	ORAI3	chr16	30960387 - 30966259	5872
TC17000207.hg.1	0.25555	10.6925	4.55961	0.00152361	0.024205	-0.923497	ALKBH5	chr17	18086392 - 18113268	26876
TC19000643.hg.1	0.256747	8.60376	3.66767	0.0055587	0.046014	-2.23816	BLOC1S3	chr19	45682003 - 45685058	3055
TC20000923.hg.1	0.256853	12.0854	5.09493	0.00074051	0.0175371	-0.190786	STAU1	chr20	47729876 - 47805288	75412
TC0X000774.hg.1	0.256997	10.0589	3.73733	0.0050042	0.0437762	-2.1317	PLXNA3	chrX	153686621 - 153701989	15368
TC01002892.hg.1	0.257053	7.69513	3.64694	0.00573591	0.046925	-2.26994	ALG14	chr1	95448279 - 95538507	90228
TC22000796.hg.1	0.257409	9.8772	5.44771	0.000470752	0.0146095	0.267762	JOSD1	chr22	39081548 - 39097561	16013
TC12000405.hg.1	0.25813	11.5457	4.07827	0.00302076	0.0336858	-1.61936	DAZAP2	chr12	51632076 - 51640501	8425
TC05000669.hg.1	0.2582	7.92933	4.30273	0.00218619	0.0284056	-1.29065	TXNDC15	chr5	134209460 - 134237323	27863
TC21000169.hg.1	0.258207	11.801	3.88174	0.00403299	0.038829	-1.91287	ETS2	chr21	40177231 - 40196879	19648
TC07001927.hg.1	0.258243	10.6101	4.68601	0.00128013	0.0223875	-0.7465	BRAF	chr7	140424943 - 140624564	199621
TC04001382.hg.1	0.258257	10.2167	3.75565	0.00486828	0.0431792	-2.1038	GPRIN3	chr4	90165429 - 90229161	63732
TC01006349.hg.1	0.258318	8.59859	4.10417	0.00290904	0.032887	-1.58107	ZMYM6NB, ZMYM6	chr1	35447127 - 35497569	50442
TC07001279.hg.1	0.258423	10.7453	5.96999	0.000248409	0.0114339	0.91162	HERPUD2	chr7	35672269 - 35734772	62503
TC16000015.hg.1	0.25847	9.61198	3.71273	0.00519303	0.044493	-2.16924	SOLH	chr16	577856 - 604636	26780
TC17000879.hg.1	0.258694	9.01564	4.14611	0.00273742	0.0319532	-1.51926	METTL23	chr17	74722912 - 74729962	7050
TC03001805.hg.1	0.25878	9.16082	3.8915	0.00397503	0.0385412	-1.89818	ANAPC13	chr3	134196546 - 134205558	9012
TC03000608.hg.1	0.258799	8.24242	3.91425	0.00384326	0.0379894	-1.86396	POGLUT1	chr3	119187785 - 119213555	25770
TC20001761.hg.1	0.258983	10.4087	5.29004	0.000575151	0.0160344	0.0652037	CPNE1	chr20	34213953 - 34262539	48586
TC10000964.hg.1	0.259178	9.91467	5.00648	0.000831883	0.0185534	-0.308789	LARP4B	chr10	855482 - 977564	122082
TC01001316.hg.1	0.259435	9.37297	3.69567	0.00532836	0.0449021	-2.1953	PMF1, PMF1-BGLAP, BGLAP	chr1	156182773 - 156213123	30350
TC0X001484.hg.1	0.260209	9.55872	4.45107	0.00177266	0.0259372	-1.07744	CXorf40B	chrX	149097723 - 149107029	9306
TC10000476.hg.1	0.260247	9.47931	4.46882	0.00172909	0.0256761	-1.05213	VCL	chr10	75754951 - 75879918	124967
TC15000410.hg.1	0.261503	8.34786	4.90649	0.000950114	0.0196156	-0.443653	TMOD2	chr15	52043758 - 52108565	64807
TC18000998.hg.1	0.26151	9.47672	4.23452	0.00241004	0.0299731	-1.38978	SMAD4	chr18	48556583 - 48611415	54832
TC11001358.hg.1	0.261537	9.46691	4.66294	0.00132124	0.0228823	-0.778623	ARFIP2	chr11	6495913 - 6502709	6796
TC12003210.hg.1	0.262063	11.735	6.53436	0.000129547	0.00901804	1.56209	ETV6	chr12	11802788 - 12048325	245537
TC05003406.hg.1	0.262774	9.70024	5.088	0.000747256	0.0175881	-0.199981	PPP2CA	chr5	133530025 - 133561950	31925
TC16002068.hg.1	0.262953	10.4757	4.223	0.00245021	0.0302049	-1.40658	SPN	chr16	29674300 - 29681823	7523
TC07000067.hg.1	0.263306	9.29407	3.92153	0.00380211	0.0377124	-1.85303	ZDHHC4	chr7	6617065 - 6629005	11940
TC01001186.hg.1	0.263517	11.9395	5.1167	0.000719728	0.0174484	-0.161929	RPRD2	chr1	150335567 - 150449042	113475
TC02001560.hg.1	0.26403	11.278	3.724	0.00510556	0.0441918	-2.15203	YWHAQ	chr2	9724101 - 9771143	47042
TC19001176.hg.1	0.264851	9.15468	3.73995	0.00498452	0.0436809	-2.12771	YIPF2	chr19	11033444 - 11039357	5913
TC09001361.hg.1	0.264906	7.78776	4.48705	0.00168557	0.0252693	-1.02621	FANCC	chr9	97861336 - 98079991	218655
TC01000323.hg.1	0.265025	8.64425	5.68538	0.000350335	0.012841	0.56587	LDLRAP1	chr1	25870071 - 25895377	25306
TC15001824.hg.1	0.265162	8.88246	6.00663	0.000237838	0.0114002	0.955252	HAPLN3	chr15	89420519 - 89438857	18338
TC12001598.hg.1	0.265596	9.41126	3.77381	0.00473745	0.0424476	-2.07618	RNF41	chr12	56596288 - 56615753	19465
TC06004114.hg.1	0.266287	12.0547	4.44291	0.00179307	0.0260206	-1.08908	DDX39B	chr6	31497996 - 31510252	12256
TC03001731.hg.1	0.266993	8.7953	3.65754	0.00564452	0.0463663	-2.25368	ALG1L	chr3	125648118 - 125655887	7769
TC02001681.hg.1	0.267776	9.00502	4.55156	0.00154072	0.0243087	-0.934852	MPV17	chr2	27532360 - 27548547	16187
TC14000439.hg.1	0.268261	9.08128	4.33459	0.00208934	0.0281009	-1.24458	PSEN1	chr14	73603143 - 73690399	87256
TC17001311.hg.1	0.268277	9.54062	3.62424	0.00593698	0.04755	-2.30481	FLOT2	chr17	27206353 - 27224715	18362
TC16001011.hg.1	0.268377	9.78745	4.31439	0.0021502	0.02829	-1.27378	CDIPT	chr16	29869678 - 29875055	5377
TC12001976.hg.1	0.269311	7.65556	3.70248	0.00527387	0.0447383	-2.18489	TMEM116	chr12	112369087 - 112451023	81936
TC17001319.hg.1	0.269869	9.01023	3.80601	0.00451455	0.0411541	-2.02731	ABHD15	chr17	27887689 - 27894042	6353
TC02002800.hg.1	0.269886	8.74504	3.64546	0.00574885	0.0469639	-2.27222	CHPF	chr2	220403669 - 220408509	4840
TC12003215.hg.1	0.270019	8.69247	3.62499	0.00593015	0.04755	-2.30365	PAN2	chr12	56710007 - 56727837	17830
TC15000820.hg.1	0.270113	10.4465	3.6246	0.00593373	0.04755	-2.30426	ZNF592	chr15	85291818 - 85349663	57845
TC16000720.hg.1	0.270726	9.17903	4.82764	0.00105615	0.0207256	-0.551088	POLR3K	chr16	96407 - 103632	7225
TC01001895.hg.1	0.27086	9.59758	4.30879	0.0021674	0.0283217	-1.28188	RNF187	chr1	228674762 - 228683889	9127
TC17001934.hg.1	0.271131	9.54781	3.93165	0.00374568	0.0373787	-1.83785	SGSH	chr17	78183079 - 78194199	11120
TC01002107.hg.1	0.271139	9.73445	4.25248	0.00234883	0.0296468	-1.36362	NADK	chr1	1682671 - 1711896	29225
TC07000278.hg.1	0.27121	10.5598	6.61708	0.000118144	0.00877108	1.65364	PPIA	chr7	44836235 - 44864163	27928
TC05000045.hg.1	0.27245	10.5756	4.79898	0.00109781	0.0211214	-0.590388	PAPD7	chr5	6714718 - 6757161	42443
TC14002319.hg.1	0.272462	8.52434	4.15323	0.00270935	0.0317574	-1.50879	C14orf126	chr14	31915242 - 31926716	11474
TC11001829.hg.1	0.274487	12.3268	6.46526	0.00014	0.0091627	1.48489	PATL1	chr11	59404189 - 59436511	32322
TC16001353.hg.1	0.274601	9.86433	4.28847	0.00223108	0.0287578	-1.31132	CHMP1A	chr16	89710839 - 89724253	13414
TC19002704.hg.1	0.274747	9.40022	3.60897	0.00607633	0.0479122	-2.32829	ATP5SL	chr19	41937223 - 41945843	8620
TC11001362.hg.1	0.275082	8.99641	4.18301	0.00259532	0.0311	-1.46508	TPP1	chr11	6633997 - 6640692	6695
TC01000515.hg.1	0.275682	9.98846	7.18084	6.43892e-05	0.00729377	2.25293	NFYC	chr1	41157242 - 41237277	80035
TC11001419.hg.1	0.275954	7.8605	4.40614	0.00188824	0.0266468	-1.14167	ZBED5	chr11	10833621 - 10879620	45999
TC19000372.hg.1	0.276282	9.78115	5.25702	0.000600054	0.0163124	0.0222972	MAU2	chr19	19431614 - 19469564	37950
TC11000624.hg.1	0.276393	11.2009	4.46469	0.00173914	0.0256877	-1.05802	DPF2	chr11	65101225 - 65120720	19495
TC03000725.hg.1	0.276526	8.23764	3.87998	0.00404352	0.0388978	-1.91552	SRPRB	chr3	133502877 - 133544616	41739
TC10000383.hg.1	0.276593	9.09084	4.19479	0.00255164	0.0309484	-1.44782	ADO	chr10	64564516 - 64568243	3727
TC0X000999.hg.1	0.276623	10.5602	5.77425	0.000314308	0.0124488	0.675145	ELK1	chrX	47494920 - 47510003	15083
TC07001575.hg.1	0.277052	8.85264	4.73573	0.00119615	0.0217699	-0.677545	C7orf23	chr7	86825478 - 86849903	24425
TC05000839.hg.1	0.277694	7.91097	3.93822	0.00370953	0.0373458	-1.828	GM2A	chr5	150591711 - 150650001	58290
TC11000593.hg.1	0.277764	9.10946	3.97061	0.00353656	0.0363987	-1.77951	GPR137	chr11	64051811 - 64056972	5161
TC01000058.hg.1	0.277877	9.07377	5.54397	0.000417273	0.0139732	0.389543	RER1	chr1	2323214 - 2336885	13671
TC0X000772.hg.1	0.27823	10.3658	3.76492	0.00480103	0.0427809	-2.08969	GDI1	chrX	153665259 - 153671814	6555
TC19001091.hg.1	0.27843	11.2929	4.34379	0.00206225	0.0278671	-1.23131	MLLT1	chr19	6210392 - 6279959	69567
TC03002155.hg.1	0.278967	10.1771	4.73273	0.00120104	0.0217699	-0.681694	TFRC	chr3	195754054 - 195809060	55006
TC19002663.hg.1	0.279182	8.35717	3.78017	0.0046925	0.0422227	-2.06651	ZNF548	chr19	57901218 - 57913919	12701
TC01003281.hg.1	0.281187	9.14459	6.24851	0.000179257	0.0098514	1.23835	SLC39A1	chr1	153931575 - 153940188	8613
TC22000723.hg.1	0.281631	8.2557	4.56767	0.0015067	0.0241413	-0.912146	C1QTNF6	chr22	37576206 - 37595425	19219
TC19001546.hg.1	0.282417	8.61497	4.06916	0.00306112	0.0339222	-1.63285	C19orf54	chr19	41246761 - 41256408	9647
TC19000015.hg.1	0.282433	12.6024	4.54018	0.00156527	0.0243605	-0.950925	PTBP1	chr19	797392 - 812327	14935
TC10001224.hg.1	0.283761	8.50997	5.1215	0.000715236	0.017407	-0.155582	2015-03-08	chr10	45950035 - 46090354	140319
TC17001664.hg.1	0.284764	9.70754	4.40607	0.00188843	0.0266468	-1.14177	PHB	chr17	47481414 - 47492246	10832
TC17001528.hg.1	0.284883	8.67049	4.85276	0.00102104	0.0204247	-0.516759	GHDC	chr17	40341105 - 40346550	5445
TC09001774.hg.1	0.284896	8.93976	3.55896	0.00655751	0.0499481	-2.40537	WDR85	chr9	140449356 - 140473387	24031
TC12000936.hg.1	0.286172	9.3848	4.39199	0.0019263	0.0269714	-1.16196	PRKAB1	chr12	120105558 - 120119435	13877
TC12001499.hg.1	0.286354	8.29259	4.38096	0.00195654	0.0271083	-1.1778	SLC11A2	chr12	51373318 - 51422349	49031
TC06000528.hg.1	0.287467	8.88598	3.86999	0.00410397	0.039071	-1.93057	KCTD20	chr6	36410544 - 36458920	48376
TC10001588.hg.1	0.288251	8.12329	4.36253	0.0020082	0.0273607	-1.2043	CWF19L1	chr10	101992050 - 102027437	35387
TC11001060.hg.1	0.2886	10.8112	4.2183	0.00246682	0.0303036	-1.41345	CD3E	chr11	118175260 - 118186890	11630
TC06000347.hg.1	0.288723	12.5376	4.7995	0.00109703	0.0211214	-0.589665	TUBB	chr6	30687978 - 30693203	5225
TC07001688.hg.1	0.289677	9.47142	5.04459	0.000791098	0.0181936	-0.257796	CLDN15	chr7	100875373 - 100882101	6728
TC19001301.hg.1	0.290169	8.98398	4.78169	0.00112379	0.0212531	-0.614147	NR2C2AP	chr19	19312224 - 19314238	2014
TC20000125.hg.1	0.29096	10.0791	3.67062	0.00553392	0.0459268	-2.23364	SEC23B	chr20	18488137 - 18542059	53922
TC17002877.hg.1	0.29116	10.0811	3.93513	0.00372648	0.0373787	-1.83263	MGC57346	chr17	43697710 - 43715329	17619
TC08000835.hg.1	0.291848	9.5226	4.26766	0.00229838	0.0292674	-1.34154	GRINA	chr8	145064226 - 145067583	3357
TC19001142.hg.1	0.293945	9.52223	3.63952	0.00580085	0.0469919	-2.28133	OR7G1	chr19	9225274 - 9226439	1165
TC06000515.hg.1	0.294192	9.57938	4.75294	0.00116848	0.021619	-0.653764	FANCE	chr6	35420132 - 35434881	14749
TC14001349.hg.1	0.29454	8.75536	4.04805	0.00315689	0.034435	-1.66415	ALKBH1	chr14	78138747 - 78174363	35616
TC01002570.hg.1	0.294553	10.6565	5.71995	0.000335811	0.0125789	0.608522	FOXJ3	chr1	42642206 - 42801548	159342
TC17001200.hg.1	0.295702	9.39163	5.46091	0.000462996	0.0145174	0.284547	TOP3A	chr17	18174742 - 18218321	43579
TC0X001020.hg.1	0.295977	10.6227	6.63121	0.000116309	0.00873153	1.66917	PIM2	chrX	48770459 - 48776413	5954
TC02002001.hg.1	0.296043	11.5108	4.77843	0.00112877	0.0212531	-0.618637	AUP1	chr2	74753772 - 74757066	3294
TC01000458.hg.1	0.296601	9.17396	4.23563	0.00240621	0.0299731	-1.38816	NCDN	chr1	36023074 - 36032875	9801
TC16000523.hg.1	0.297751	9.51309	5.55892	0.000409575	0.0137958	0.408335	PDP2	chr16	66914383 - 66925002	10619
TC01003395.hg.1	0.298011	9.10191	5.04658	0.000789028	0.0181936	-0.255139	PIGM	chr1	159994743 - 160001783	7040
TC07001660.hg.1	0.298156	8.97795	3.98602	0.00345726	0.0360673	-1.75648	C7orf43	chr7	99752043 - 99756338	4295
TC06001574.hg.1	0.298177	11.0779	4.12361	0.00282811	0.0324512	-1.55239	TAP1	chr6	32812986 - 32821755	8769
TC0X000254.hg.1	0.298894	8.64477	4.60936	0.0014223	0.023472	-0.853544	TBC1D25	chrX	48397845 - 48420997	23152
TC07001505.hg.1	0.299294	9.31906	6.01929	0.000234302	0.0113553	0.970273	ABHD11	chr7	73150424 - 73153197	2773
TC06001695.hg.1	0.299821	8.4079	3.81127	0.00447918	0.041027	-2.01933	SAYSD1	chr6	39071840 - 39082965	11125
TC01002262.hg.1	0.300874	9.17665	4.84619	0.0010301	0.0205057	-0.525729	FBXO42	chr1	16573334 - 16678951	105617
TC08000126.hg.1	0.301663	9.38574	4.06569	0.00307664	0.0340446	-1.63799	VPS37A	chr8	17104080 - 17159936	55856
TC08000857.hg.1	0.301878	9.29307	3.78805	0.00463751	0.041967	-2.05456	MFSD3	chr8	145734457 - 145736589	2132
TC10001701.hg.1	0.301924	9.2532	4.22239	0.00245235	0.0302049	-1.40747	SFXN4	chr10	120900279 - 120925204	24925
TC12000992.hg.1	0.301982	8.21811	3.61467	0.0060239	0.0477506	-2.31952	TCTN2	chr12	124155660 - 124192950	37290
TC12001619.hg.1	0.30324	10.0644	3.58009	0.00634945	0.0491998	-2.37277	TMEM194A	chr12	57449426 - 57481846	32420
TC02001790.hg.1	0.305737	11.9841	4.12188	0.00283518	0.0324999	-1.55493	ZFP36L2	chr2	43449541 - 43453748	4207
TC20001044.hg.1	0.3061	9.73148	4.86725	0.00100137	0.0202139	-0.496998	SAMD10	chr20	62605466 - 62611362	5896
TC16000193.hg.1	0.306797	11.1591	3.89013	0.00398311	0.0385538	-1.90024	ABCC1	chr16	16043434 - 16236931	193497
TC16000502.hg.1	0.306928	9.02202	3.72431	0.00510322	0.0441918	-2.15156	GINS3	chr16	58426298 - 58440048	13750
TC0X001180.hg.1	0.307767	8.13728	5.12141	0.000715314	0.017407	-0.155693	ITM2A	chrX	78615881 - 78623164	7283
TC0X000580.hg.1	0.308182	10.0893	3.64211	0.00577812	0.0469919	-2.27736	PGRMC1	chrX	118370211 - 118378429	8218
TC09001607.hg.1	0.308348	8.44313	4.90339	0.000954048	0.0196156	-0.447848	TOR2A	chr9	130493803 - 130497628	3825
TC11001945.hg.1	0.30856	9.78668	3.82509	0.0043877	0.0405448	-1.9984	CFL1	chr11	65622272 - 65628892	6620
TC15000628.hg.1	0.308574	9.24793	4.17025	0.00264355	0.0312706	-1.48379	FEM1B	chr15	68570141 - 68588203	18062
TC05003401.hg.1	0.30879	10.8195	6.38244	0.000153762	0.00949491	1.39148	C5orf24	chr5	134181370 - 134195427	14057
TC02000735.hg.1	0.30879	10.7772	4.60031	0.00144018	0.023551	-0.866242	ACTR3	chr2	114647537 - 114720173	72636
TC15000667.hg.1	0.309338	9.30628	3.91299	0.00385046	0.0380279	-1.86586	CD276	chr15	73976554 - 74006859	30305
TC03001408.hg.1	0.30964	11.4346	4.61269	0.00141578	0.0234317	-0.848871	RHOA	chr3	49396578 - 49450431	53853
TC12000387.hg.1	0.309801	10.1265	4.5721	0.00149748	0.024056	-0.905908	SMARCD1	chr12	50478755 - 50494495	15740
TC06002333.hg.1	0.310164	8.78074	5.39102	0.000505701	0.0149693	0.195379	WDR27	chr6	169857303 - 170102159	244856
TC05000952.hg.1	0.310505	8.98647	6.19905	0.000189813	0.0100935	1.18115	ERGIC1	chr5	172261223 - 172379688	118465
TC18000413.hg.1	0.310918	9.47224	3.76814	0.00477792	0.0426573	-2.0848	NPC1	chr18	21108363 - 21166581	58218
TC20000939.hg.1	0.311532	9.82959	4.75309	0.00116824	0.021619	-0.653559	ADNP	chr20	49505585 - 49547958	42373
TC01000113.hg.1	0.311784	9.06001	5.48617	0.000448541	0.0143909	0.316586	H6PD	chr1	9294834 - 9331396	36562
TC11001852.hg.1	0.312784	8.61584	5.1647	0.000676104	0.0171429	-0.0985604	CYBASC3	chr11	61116220 - 61129771	13551
TC02002545.hg.1	0.312967	9.87253	4.00831	0.00334598	0.0354422	-1.72325	ATF2	chr2	175936978 - 176033110	96132
TC03002133.hg.1	0.313123	10.5633	3.97121	0.0035334	0.0363987	-1.77861	ATP13A3	chr3	194123401 - 194219093	95692
TC14000135.hg.1	0.313957	9.30074	6.56964	0.000124542	0.00894057	1.60125	LRP10	chr14	23340822 - 23350789	9967
TC01001317.hg.1	0.313979	8.40912	4.55306	0.00153753	0.0243087	-0.932742	TMEM79	chr1	156252704 - 156262976	10272
TC02002726.hg.1	0.314442	8.48532	5.31576	0.000556526	0.0156673	0.0985162	IDH1	chr2	209100951 - 209130798	29847
TC10001361.hg.1	0.315411	8.90977	3.86873	0.00411169	0.039071	-1.93248	SAR1A	chr10	71909960 - 71930285	20325
TC16000123.hg.1	0.31551	9.71735	4.0495	0.00315023	0.0344277	-1.66201	ZNF174	chr16	3451190 - 3459370	8180
TC22000347.hg.1	0.315627	10.5742	5.44366	0.000473162	0.0146095	0.262603	SREBF2	chr22	42229106 - 42303312	74206
TC10000322.hg.1	0.315714	8.72726	3.69351	0.00534579	0.045016	-2.19861	MAPK8	chr10	49514698 - 49647403	132705
TC17002896.hg.1	0.315741	8.40323	5.78757	0.000309268	0.0123509	0.691411	RFFL	chr17	33333009 - 33416348	83339
TC17000880.hg.1	0.316728	8.4365	4.15317	0.00270958	0.0317574	-1.50887	MFSD11	chr17	74732272 - 74779284	47012
TC15000949.hg.1	0.31727	10.3402	5.96175	0.000250857	0.0114339	0.901778	IGF1R	chr15	99192200 - 99507759	315559
TC17001453.hg.1	0.318098	8.37012	4.72609	0.00121196	0.0217871	-0.690888	PGAP3	chr17	37827375 - 37844310	16935
TC11000970.hg.1	0.318315	8.71842	3.89489	0.00395507	0.0385412	-1.89307	AASDHPPT	chr11	105948216 - 105969437	21221
TC01003467.hg.1	0.318793	10.8782	6.7422	0.000102932	0.00840586	1.79031	TMCO1	chr1	165693528 - 165796992	103464
TC03001112.hg.1	0.319029	9.2565	3.62885	0.00589549	0.0474531	-2.29771	RPL35A	chr3	197676858 - 197683481	6623
TC04001403.hg.1	0.319509	9.2016	4.60537	0.00143015	0.023534	-0.859142	EIF4E	chr4	99792835 - 99851788	58953
TC19000355.hg.1	0.319588	8.19166	3.60023	0.00615766	0.0481791	-2.34174	PGPEP1	chr19	18451408 - 18480763	29355
TC06001532.hg.1	0.319667	10.2533	4.13125	0.00279695	0.032316	-1.54113	BAG6	chr6	31606805 - 31620482	13677
TC04001431.hg.1	0.320839	9.4774	5.17823	0.000664337	0.0169568	-0.0807716	UBE2D3	chr4	103715540 - 103790053	74513
TC17000529.hg.1	0.321036	10.0148	4.16141	0.00267751	0.0315425	-1.49677	COASY	chr17	40714092 - 40718295	4203
TC01000352.hg.1	0.32175	10.8489	6.05247	0.000225299	0.0110118	1.00956	ZDHHC18	chr1	27153201 - 27183406	30205
TC17000003.hg.1	0.321764	9.09014	3.71749	0.00515592	0.0444601	-2.16197	FAM57A	chr17	635824 - 646081	10257
TC12000189.hg.1	0.322125	8.69229	3.81217	0.00447316	0.041027	-2.01797	EMP1	chr12	13349602 - 13369708	20106
TC17000897.hg.1	0.322393	10.3005	4.71838	0.00122477	0.0217871	-0.70157	SYNGR2	chr17	76164671 - 76169009	4338
TC02001997.hg.1	0.322452	9.4917	6.49364	0.0001356	0.00911248	1.51667	MOGS	chr2	74688184 - 74692537	4353
TC09000884.hg.1	0.323482	8.79072	5.61981	0.000379792	0.0134224	0.484493	AK3	chr9	4709557 - 4742043	32486
TC17000530.hg.1	0.323533	10.7404	3.9251	0.00378211	0.037579	-1.84767	MLX	chr17	40719078 - 40725221	6143
TC08001094.hg.1	0.323645	8.94642	4.5008	0.00165351	0.0249897	-1.00668	INTS9	chr8	28625175 - 28747759	122584
TC11000542.hg.1	0.323927	10.6942	6.00532	0.000238207	0.0114002	0.953695	FADS2	chr11	61583728 - 61634826	51098
TC03003385.hg.1	0.323991	9.10113	5.15325	0.000686247	0.0172259	-0.113649	NICN1	chr3	49460379 - 49466759	6380
TC01000968.hg.1	0.324037	10.3346	4.98719	0.000853388	0.0187353	-0.334684	CD53	chr1	111413821 - 111442558	28737
TC22001491.hg.1	0.324205	9.67934	4.91597	0.00093815	0.0194505	-0.43079	MFNG	chr22	37865101 - 37882478	17377
TC04001685.hg.1	0.32442	9.00558	4.70201	0.00125243	0.0221314	-0.724267	C4orf46	chr4	159587831 - 159593407	5576
TC17000526.hg.1	0.325059	9.02979	4.43993	0.00180058	0.0260471	-1.09333	NAGLU	chr17	40687951 - 40696466	8515
TC17001295.hg.1	0.325967	10.6561	3.67724	0.00547882	0.0457137	-2.22351	POLDIP2	chr17	26673659 - 26684603	10944
TC01006382.hg.1	0.327467	10.3681	4.69318	0.00126765	0.0222974	-0.736539	KRTCAP2	chr1	155141884 - 155145951	4067
TC12000403.hg.1	0.328411	9.36675	4.80957	0.00108222	0.0209426	-0.575853	LETMD1	chr12	51442082 - 51454207	12125
TC16001233.hg.1	0.328867	9.36106	4.04677	0.00316281	0.0344367	-1.66606	EXOSC6	chr16	70280681 - 70285833	5152
TC16000983.hg.1	0.329393	11.5173	3.97336	0.00352223	0.036378	-1.77539	XPO6	chr16	28109316 - 28223190	113874
TC16001027.hg.1	0.329623	10.0109	6.59814	0.000120654	0.00877108	1.63276	CD2BP2	chr16	30362087 - 30366682	4595
TC18000049.hg.1	0.3298	10.3004	3.88519	0.00401237	0.0386953	-1.90767	VAPA	chr18	9913955 - 9960018	46063
TC01001300.hg.1	0.330004	9.26878	4.07149	0.00305073	0.0339222	-1.62939	RUSC1	chr1	155290640 - 155300909	10269
TC14000157.hg.1	0.330233	9.08393	3.74494	0.00494728	0.043577	-2.12011	PCK2	chr14	24563262 - 24573339	10077
TC03003339.hg.1	0.3305	10.358	6.27051	0.00017477	0.0098514	1.26368	CLDND1	chr3	98216756 - 98241910	25154
TC17001954.hg.1	0.332163	11.128	3.97337	0.00352221	0.036378	-1.77538	NPLOC4	chr17	79523913 - 79616376	92463
TC13000351.hg.1	0.332292	9.02812	4.32644	0.00211367	0.0281064	-1.25635	UBAC2	chr13	99852679 - 100038753	186074
TC16000569.hg.1	0.33329	9.56677	4.86363	0.00100625	0.0202767	-0.501934	CYB5B	chr16	69458428 - 69500169	41741
TC06001545.hg.1	0.333723	8.74661	3.58242	0.00632699	0.0491026	-2.36918	LSM2	chr6	31765169 - 31774761	9592
TC12000637.hg.1	0.334417	9.22456	5.74713	0.000324856	0.012468	0.641919	ATXN7L3B	chr12	74931551 - 74935232	3681
TC07001054.hg.1	0.33456	10.6377	4.23466	0.00240958	0.0299731	-1.38958	UBE3C	chr7	156931607 - 157062066	130459
TC17001627.hg.1	0.334761	8.59903	4.7887	0.00111319	0.0212393	-0.604514	MRPL10	chr17	45900638 - 45908907	8269
TC17000203.hg.1	0.335185	8.5504	6.64806	0.00011416	0.00862661	1.68768	C17orf39	chr17	17942606 - 17971718	29112
TC08000645.hg.1	0.335231	8.3631	4.20564	0.00251212	0.0306308	-1.43195	FZD6	chr8	104310661 - 104345094	34433
TC17001895.hg.1	0.335267	10.6048	4.73675	0.0011945	0.0217699	-0.676141	RNF157	chr17	74138534 - 74236390	97856
TC12001756.hg.1	0.336137	10.2909	4.88017	0.000984168	0.0200181	-0.479406	E2F7	chr12	77415026 - 77459360	44334
TC0X000253.hg.1	0.336158	9.52458	4.98314	0.00085798	0.0187353	-0.340128	EBP	chrX	48379546 - 48387104	7558
TC01000359.hg.1	0.336293	9.19524	3.63698	0.00582324	0.0470364	-2.28523	TMEM222	chr1	27648636 - 27662891	14255
TC09001049.hg.1	0.336793	9.80575	4.77699	0.00113097	0.0212531	-0.620614	FANCG	chr9	35073832 - 35080013	6181
TC12001331.hg.1	0.337433	8.61823	3.65612	0.00565672	0.0463762	-2.25586	TM7SF3	chr12	27124506 - 27167339	42833
TC06000195.hg.1	0.338416	9.99543	5.32639	0.000549022	0.0156091	0.112251	HMGN4	chr6	26538572 - 26547164	8592
TC01001204.hg.1	0.338667	10.8839	5.8764	0.000277816	0.0119299	0.799259	PIP5K1A	chr1	151170425 - 151222012	51587
TC04002945.hg.1	0.338698	7.67573	5.32677	0.000548761	0.0156091	0.112731	HSD17B11	chr4	88257691 - 88312538	54847
TC11000747.hg.1	0.339128	9.77391	3.78271	0.00467471	0.0421788	-2.06266	IL18BP	chr11	71709587 - 71716761	7174
TC19001438.hg.1	0.339691	8.76134	4.62393	0.00139403	0.0233523	-0.833134	ZNF792	chr19	35447258 - 35454953	7695
TC11001871.hg.1	0.340983	10.0678	4.95135	0.000894962	0.0191069	-0.382953	EML3	chr11	62369690 - 62380237	10547
TC0X000538.hg.1	0.341212	8.44667	5.92819	0.000261103	0.0116666	0.861589	TMEM164	chrX	109245859 - 109425962	180103
TC02001486.hg.1	0.341294	9.11515	3.70966	0.0052171	0.044506	-2.17392	D2HGDH	chr2	242673994 - 242708231	34237
TC06001980.hg.1	0.341369	9.63557	3.86811	0.00411549	0.039071	-1.93342	PREP	chr6	105725440 - 105850999	125559
TC16001196.hg.1	0.342005	9.40541	4.035	0.00321771	0.0347356	-1.68354	RANBP10	chr16	67756976 - 67840555	83579
TC15000724.hg.1	0.343528	9.87789	3.63337	0.0058552	0.0472281	-2.29077	IDH3A	chr15	78441663 - 78464291	22628
TC12001865.hg.1	0.34409	10.1782	4.78074	0.00112524	0.0212531	-0.615455	UHRF1BP1L	chr12	100430854 - 100536642	105788
TC12001966.hg.1	0.346168	9.62201	4.82738	0.00105652	0.0207256	-0.551445	PPTC7	chr12	110969120 - 111021125	52005
TC11001911.hg.1	0.346663	12.251	8.8187	1.32768e-05	0.00496971	3.7741	SF1	chr11	64532076 - 64546316	14240
TC21000148.hg.1	0.346768	9.05862	4.72864	0.00120776	0.0217777	-0.687364	CBR1	chr21	37442239 - 37445464	3225
TC11001007.hg.1	0.347573	8.66375	3.93898	0.00370535	0.0373458	-1.82686	SDHD	chr11	111957497 - 111990353	32856
TC06000584.hg.1	0.34818	8.78584	4.1837	0.00259275	0.0311	-1.46407	KIAA0240	chr6	42714696 - 42836296	121600
TC01002870.hg.1	0.348184	8.4529	6.31493	0.00016608	0.00975074	1.3146	FAM69A	chr1	93298286 - 93427079	128793
TC19000180.hg.1	0.348473	10.6649	4.83572	0.00104471	0.0206595	-0.540032	SLC44A2	chr19	10713121 - 10755235	42114
TC11000154.hg.1	0.348653	10.5566	3.69182	0.00535943	0.0450472	-2.20119	EIF3F	chr11	7991798 - 8023409	31611
TC01002461.hg.1	0.349393	10.5165	5.85586	0.000284764	0.0120447	0.774431	PTP4A2	chr1	32372022 - 32410457	38435
TC12001184.hg.1	0.349536	9.25641	4.93454	0.000915213	0.0193951	-0.405663	M6PR	chr12	9092957 - 9102551	9594
TC06001580.hg.1	0.350115	10.0803	4.382	0.00195366	0.0271012	-1.1763	RXRB	chr6	33161365 - 33168630	7265
TC10001707.hg.1	0.351333	10.1511	5.13173	0.000705752	0.0173211	-0.142052	MCMBP	chr10	121588916 - 121633140	44224
TC10001694.hg.1	0.351365	8.55645	5.68698	0.000349645	0.012841	0.567858	CACUL1	chr10	120433634 - 120514761	81127
TC01003500.hg.1	0.35145	11.6146	3.90567	0.00389239	0.0382774	-1.87685	SELL	chr1	169659806 - 169680843	21037
TC17000899.hg.1	0.351943	11.1803	6.58095	0.000122984	0.00888421	1.61376	BIRC5	chr17	76210277 - 76221716	11439
TC06001587.hg.1	0.351966	9.60507	4.13374	0.00278687	0.0323107	-1.53746	CUTA	chr6	33384219 - 33386094	1875
TC01006298.hg.1	0.353127	11.5127	7.20852	6.25562e-05	0.00729377	2.28127	GNB1	chr1	1716725 - 1822526	105801
TC0X000721.hg.1	0.355428	10.1176	5.54115	0.000418741	0.0139816	0.385999	MAMLD1	chrX	149529689 - 149682448	152759
TC01003786.hg.1	0.355804	8.27811	6.16145	0.000198292	0.0103999	1.13744	C1orf74	chr1	209955661 - 209957904	2243
TC02002211.hg.1	0.355967	10.8434	3.64147	0.0057837	0.0469919	-2.27834	ANAPC1	chr2	112523848 - 112642267	118419
TC11002360.hg.1	0.356384	8.74784	6.48069	0.000137588	0.0091627	1.50219	SLC37A4	chr11	118894824 - 118901616	6792
TC11002151.hg.1	0.356491	8.26826	4.49587	0.00166493	0.0250962	-1.01368	PRCP	chr11	82534544 - 82612733	78189
TC12000496.hg.1	0.357677	10.1752	5.105	0.000730819	0.0175371	-0.177431	CDK2	chr12	56360553 - 56366568	6015
TC17001612.hg.1	0.358511	9.86177	4.56507	0.00151212	0.0241413	-0.915798	ARL17B, ARL17A	chr17	44363862 - 44439163	75301
TC01003201.hg.1	0.359893	8.69552	5.84142	0.000289763	0.0121468	0.756936	APH1A	chr1	150237799 - 150241980	4181
TC01002401.hg.1	0.361171	10.1417	3.56274	0.00651977	0.0499481	-2.39954	SLC9A1	chr1	27425300 - 27493472	68172
TC03000180.hg.1	0.36241	8.24942	6.73118	0.000104182	0.00840586	1.77836	C3orf35	chr3	37427760 - 37476988	49228
TC01006380.hg.1	0.362718	9.54836	3.96762	0.00355213	0.0364609	-1.78398	PYGO2	chr1	154929502 - 154934512	5010
TC03000149.hg.1	0.363276	9.10996	3.69904	0.00530132	0.0447757	-2.19015	TGFBR2	chr3	30647994 - 30735634	87640
TC11000567.hg.1	0.364523	10.5833	4.69561	0.00126344	0.0222575	-0.733162	SLC3A2	chr11	62623484 - 62656355	32871
TC16000912.hg.1	0.364737	11.9649	4.51869	0.00161279	0.0246664	-0.981328	NOMO2	chr16	18511182 - 18573533	62351
TC06000605.hg.1	0.364978	9.60604	3.77992	0.00469427	0.0422227	-2.06689	POLH	chr6	43543878 - 43588260	44382
TC16000520.hg.1	0.36498	9.83975	5.26545	0.000593584	0.0162719	0.0332719	CMTM3	chr16	66637935 - 66647795	9860
TC11001741.hg.1	0.365177	10.8073	6.07476	0.000219464	0.0108645	1.03586	CELF1	chr11	47487489 - 47574792	87303
TC12001445.hg.1	0.365294	8.72255	3.71203	0.00519847	0.044493	-2.1703	ASB8	chr12	48541571 - 48551378	9807
TC16000194.hg.1	0.365987	11.9652	4.54382	0.00155739	0.0243605	-0.94579	NOMO3, NOMO2	chr16	16326389 - 16388668	62279
TC03001624.hg.1	0.366233	11.1061	5.25042	0.000605169	0.0163319	0.0137038	CBLB	chr3	105374305 - 105588396	214091
TC02000585.hg.1	0.366537	8.70908	5.25081	0.000604868	0.0163319	0.0142073	CNNM4	chr2	97426639 - 97477628	50989
TC17001537.hg.1	0.366769	8.58929	4.60787	0.00142523	0.0234866	-0.855635	FAM134C	chr17	40731526 - 40762641	31115
TC08000296.hg.1	0.367187	9.45542	4.64078	0.00136207	0.0232118	-0.80956	PLEKHA2	chr8	38758753 - 38831430	72677
TC01003712.hg.1	0.367403	8.92786	5.46176	0.000462501	0.0145174	0.285629	CYB5R1	chr1	202930997 - 202936408	5411
TC16000180.hg.1	0.36796	11.9147	4.59068	0.00145946	0.0237441	-0.879761	NOMO1	chr16	14927538 - 14990017	62479
TC01000663.hg.1	0.368157	10.296	3.71462	0.00517825	0.0444658	-2.16635	MRPL37	chr1	54649714 - 54686603	36889
TC01003335.hg.1	0.369935	8.80044	4.67499	0.00129959	0.0226168	-0.761833	C1orf85	chr1	156259880 - 156265463	5583
TC15002782.hg.1	0.37066	8.05728	6.607	0.000119473	0.00877108	1.64252	AP3S2, C15orf38-AP3S2	chr15	90373831 - 90437617	63786
TC09000128.hg.1	0.370976	9.12918	4.13283	0.00279055	0.0323107	-1.5388	ACO1	chr9	32384601 - 32450834	66233
TC22000311.hg.1	0.3733	8.62161	5.58952	0.000394304	0.0136005	0.446674	APOBEC3H	chr22	39493229 - 39500072	6843
TC03000207.hg.1	0.373809	8.89723	4.27356	0.00227907	0.0291183	-1.33296	EIF1B	chr3	40351173 - 40353915	2742
TC16000499.hg.1	0.375103	8.2892	3.93756	0.00371312	0.0373458	-1.82898	C16orf57	chr16	58035277 - 58055527	20250
TC22000223.hg.1	0.375347	8.46493	6.87258	8.93324e-05	0.00813099	1.93048	RNF185	chr22	31556138 - 31603005	46867
TC08001144.hg.1	0.376775	9.06412	6.66561	0.000111969	0.00862661	1.7069	PPAPDC1B	chr8	38120648 - 38126761	6113
TC22000245.hg.1	0.377127	10.1991	6.46091	0.000140688	0.0091627	1.48001	FBXO7	chr22	32870663 - 32894818	24155
TC01000374.hg.1	0.377212	9.06606	4.18369	0.00259277	0.0311	-1.46408	XKR8	chr1	28285973 - 28294607	8634
TC22000350.hg.1	0.378462	8.82828	6.76043	0.0001009	0.00840586	1.81005	2015-09-03	chr22	42372276 - 42394225	21949
TC05001275.hg.1	0.379937	10.4093	4.45789	0.00175577	0.0257557	-1.0677	NUP155	chr5	37288239 - 37371283	83044
TC03000816.hg.1	0.380069	8.4383	4.28648	0.0022374	0.0287781	-1.3142	SELT	chr3	150320662 - 150348234	27572
TC08000317.hg.1	0.38081	10.8696	6.69523	0.000108376	0.00852604	1.73925	GOLGA7	chr8	41347915 - 41368499	20584
TC22000647.hg.1	0.380877	11.9782	4.7417	0.00118647	0.0217349	-0.66929	LIF	chr22	30636436 - 30642840	6404
TC03001367.hg.1	0.38175	9.40375	4.10642	0.00289955	0.0328444	-1.57774	SCAP	chr3	47455184 - 47518616	63432
TC04001501.hg.1	0.3825	11.6607	4.51998	0.00160988	0.0246664	-0.979496	FLJ14186	chr4	120326678 - 120331815	5137
TC14000939.hg.1	0.382813	11.0301	4.86938	0.00099851	0.0201917	-0.494096	RBM23	chr14	23369854 - 23388396	18542
TC01000125.hg.1	0.384104	10.13	4.01391	0.00331861	0.0353072	-1.71491	UBE4B	chr1	10092890 - 10241297	148407
TC0X001357.hg.1	0.384832	10.2351	4.1605	0.00268103	0.0315516	-1.49811	ELF4	chrX	129198849 - 129244691	45842
TC17001754.hg.1	0.385537	7.62572	4.08633	0.00298552	0.0334226	-1.60744	RNFT1	chr17	58029601 - 58042122	12521
TC02001168.hg.1	0.385782	8.50211	6.94493	8.26468e-05	0.00778325	2.00727	NIF3L1	chr2	201754050 - 201768655	14605
TC16001294.hg.1	0.386173	10.5597	3.60208	0.00614031	0.0481413	-2.33889	CDYL2	chr16	80637675 - 80838175	200500
TC09000358.hg.1	0.387036	9.49874	3.6101	0.00606586	0.0479049	-2.32655	PSAT1	chr9	80912043 - 80945009	32966
TC17001081.hg.1	0.387207	11.9509	6.96141	8.12012e-05	0.00778325	2.02468	GABARAP	chr17	7143333 - 7145772	2439
TC01002681.hg.1	0.387276	8.04991	5.82568	0.000295322	0.012208	0.737828	TMEM59	chr1	54497347 - 54519177	21830
TC01003476.hg.1	0.387815	8.75642	7.18799	6.39102e-05	0.00729377	2.26026	ILDR2	chr1	166882441 - 166944719	62278
TC06001506.hg.1	0.388386	8.93778	3.98138	0.00348093	0.0362382	-1.76341	NRM	chr6	30655824 - 30659197	3373
TC07001039.hg.1	0.388922	9.92356	4.78467	0.00111928	0.0212531	-0.610057	INSIG1	chr7	155089486 - 155101945	12459
TC03001273.hg.1	0.389284	8.97244	5.37789	0.000514195	0.0150961	0.178538	GLB1, TMPPE	chr3	33038100 - 33138722	100622
TC01001639.hg.1	0.390542	8.83777	3.85467	0.00419856	0.039496	-1.9537	NEK7	chr1	198126093 - 198574306	448213
TC20000784.hg.1	0.39086	10.934	5.11358	0.000722665	0.0174748	-0.166057	PIGU	chr20	33148346 - 33265089	116743
TC12000509.hg.1	0.39244	8.71317	5.57615	0.000400901	0.0137455	0.429934	COQ10A	chr12	56660642 - 56664750	4108
TC11003487.hg.1	0.3932	9.24196	3.6993	0.00529925	0.0447757	-2.18975	BSCL2	chr11	62457734 - 62477317	19583
TC18000453.hg.1	0.393285	9.45857	3.85329	0.0042072	0.0395449	-1.95578	ZNF24	chr18	32912176 - 32924426	12250
TC09002896.hg.1	0.393864	10.0532	4.5837	0.00147362	0.0238395	-0.889582	GALT	chr9	34638130 - 34650580	12450
TC05001232.hg.1	0.39388	10.3679	4.98766	0.000852854	0.0187353	-0.334048	GOLPH3	chr5	32124810 - 32174456	49646
TC17000727.hg.1	0.393997	11.4825	5.67331	0.000355563	0.0128428	0.550946	VMP1	chr17	57784863 - 57917952	133089
TC17002872.hg.1	0.396113	8.75665	3.75732	0.00485612	0.0431714	-2.10126	SARM1	chr17	26691378 - 26728065	36687
TC17001448.hg.1	0.396415	8.7558	4.98447	0.000856465	0.0187353	-0.338335	FBXL20	chr17	37408897 - 37557909	149012
TC04000678.hg.1	0.397801	9.00655	4.36569	0.00199924	0.0273607	-1.19975	CCRN4L	chr4	139936943 - 139967095	30152
TC01003215.hg.1	0.398137	11.1802	4.22206	0.00245352	0.0302049	-1.40796	CERS2	chr1	150933059 - 150947479	14420
TC01000358.hg.1	0.398203	8.82024	6.19965	0.000189682	0.0100935	1.18184	WDTC1	chr1	27561007 - 27635110	74103
TC17000965.hg.1	0.398207	10.2743	3.90125	0.00391797	0.0383975	-1.8835	FAM101B	chr17	289769 - 295731	5962
TC11002165.hg.1	0.398447	10.4587	7.82547	3.35451e-05	0.0060884	2.88849	PICALM	chr11	85668214 - 85780924	112710
TC01002416.hg.1	0.398486	9.66714	4.43458	0.00181416	0.026071	-1.10097	EYA3	chr1	28296855 - 28415207	118352
TC01003290.hg.1	0.398524	9.60617	5.00663	0.000831713	0.0185534	-0.308582	C1orf43	chr1	154179183 - 154193273	14090
TC06001955.hg.1	0.39899	7.65016	4.44345	0.0017917	0.0260206	-1.0883	GPR63	chr6	97241998 - 97285353	43355
TC09001638.hg.1	0.40012	8.86879	4.53978	0.00156615	0.0243605	-0.951495	ZER1	chr9	131492065 - 131534693	42628
TC05001110.hg.1	0.401274	9.59117	4.11105	0.0028801	0.0327209	-1.5709	LPCAT1	chr5	1456595 - 1524092	67497
TC03001323.hg.1	0.401812	8.37064	6.3022	0.00016852	0.00975074	1.30004	SEC22C	chr3	42589459 - 42642572	53113
TC06001588.hg.1	0.402035	9.53552	3.57085	0.00643951	0.0497072	-2.38701	BAK1	chr6	33540323 - 33548070	7747
TC09001539.hg.1	0.402666	9.38402	4.39407	0.00192065	0.026969	-1.15898	PSMD5	chr9	123577774 - 123605229	27455
TC07000935.hg.1	0.403252	9.49108	3.72162	0.00512391	0.0442839	-2.15566	ZYX	chr7	143058810 - 143088206	29396
TC07000476.hg.1	0.403901	9.76438	4.52694	0.00159436	0.0245344	-0.969642	RHBDD2	chr7	75471920 - 75518244	46324
TC01003497.hg.1	0.404621	8.25409	5.01353	0.000824169	0.0185253	-0.299338	SLC19A2	chr1	169433147 - 169455241	22094
TC01001012.hg.1	0.405634	8.65754	4.53463	0.00157741	0.0244049	-0.958776	VANGL1	chr1	116184574 - 116240845	56271
TC11000565.hg.1	0.406286	9.69841	3.96549	0.00356331	0.0365104	-1.78717	TMEM179B	chr11	62554874 - 62557872	2998
TC09001688.hg.1	0.407447	10.51	5.22335	0.00062666	0.0163959	-0.0216318	SURF4	chr9	136228325 - 136242970	14645
TC17001094.hg.1	0.409867	10.4412	5.0291	0.000807403	0.0183002	-0.278488	TP53	chr17	7565097 - 7590868	25771
TC09001228.hg.1	0.409899	9.44263	5.33284	0.000544528	0.0155583	0.120565	GNAQ	chr9	80331003 - 80646374	315371
TC06001692.hg.1	0.410277	11.864	4.08637	0.00298532	0.0334226	-1.60737	GLO1	chr6	38643702 - 38670952	27250
TC01000319.hg.1	0.411287	10.3165	4.84906	0.00102614	0.0204622	-0.521815	TMEM50A	chr1	25664408 - 25688852	24444
TC06000345.hg.1	0.412136	9.47533	3.6181	0.00599254	0.0476005	-2.31424	C6orf136	chr6	30614816 - 30620987	6171
TC06004109.hg.1	0.412438	9.70643	4.21326	0.00248474	0.0304261	-1.42081	TXNDC5	chr6	7881483 - 7911047	29564
TC05000840.hg.1	0.413084	8.16244	3.60983	0.0060684	0.0479049	-2.32697	SLC36A1	chr5	150816553 - 150871942	55389
TC17001613.hg.1	0.413583	10.1395	5.75845	0.000320409	0.012468	0.655796	ARL17A, ARL17B	chr17	44594068 - 44657088	63020
TC08001218.hg.1	0.414403	9.23766	5.03648	0.00079959	0.0182777	-0.268625	LYPLA1	chr8	54958938 - 55014577	55639
TC10001558.hg.1	0.414611	9.80971	3.64039	0.00579321	0.0469919	-2.28	TM9SF3	chr10	98277866 - 98347209	69343
TC13001719.hg.1	0.415355	9.48145	4.65328	0.00133887	0.0230082	-0.7921	FOXO1	chr13	41129801 - 41240734	110933
TC01003711.hg.1	0.415449	10.0008	4.18202	0.00259903	0.0311	-1.46653	ADIPOR1	chr1	202909951 - 202927700	17749
TC11000367.hg.1	0.416934	8.32223	4.03834	0.00320202	0.0345987	-1.67857	HSD17B12	chr11	43665816 - 43878169	212353
TC22001478.hg.1	0.417009	10.0399	3.87578	0.00406885	0.0390107	-1.92185	SAMM50	chr22	44351261 - 44406411	55150
TC14000303.hg.1	0.417038	8.93526	4.32014	0.00213268	0.0282187	-1.26546	GNG2	chr14	52292913 - 52436518	143605
TC05000161.hg.1	0.417841	9.69334	3.9061	0.00388993	0.0382774	-1.87621	SKP2	chr5	36152091 - 36184421	32330
TC16001280.hg.1	0.418393	8.67421	7.18765	6.39327e-05	0.00729377	2.25991	TMEM170A	chr16	75476952 - 75498584	21632
TC17001571.hg.1	0.419197	12.0678	4.24423	0.00237673	0.0298026	-1.37563	LSM12	chr17	42112003 - 42144987	32984
TC19001280.hg.1	0.419913	10.4883	3.55894	0.0065577	0.0499481	-2.4054	JAK3	chr19	17935591 - 17958841	23250
TC03002077.hg.1	0.420133	8.66518	4.84031	0.00103828	0.0206327	-0.533759	TMEM41A	chr3	185194284 - 185216845	22561
TC17001065.hg.1	0.420477	8.04743	3.81768	0.00443655	0.0408373	-2.00963	RN5S435	chr17	6504264 - 6504371	107
TC09002909.hg.1	0.420497	10.3651	4.00651	0.00335481	0.0354775	-1.72593	NUP188	chr9	131709977 - 131769375	59398
TC11001904.hg.1	0.420744	10.1377	4.16947	0.00264651	0.0312735	-1.48493	TRMT112	chr11	64083932 - 64085556	1624
TC17001307.hg.1	0.420787	9.97989	4.32626	0.00211422	0.0281064	-1.25662	FAM222B	chr17	27082996 - 27169841	86845
TC02000703.hg.1	0.420818	7.66586	4.2618	0.00231771	0.0294147	-1.35006	TMEM87B	chr2	112812800 - 112876895	64095
TC07003350.hg.1	0.421194	9.00363	6.42856	0.000145925	0.0091627	1.44361	KDELR2	chr7	6500712 - 6523873	23161
TC11001048.hg.1	0.42259	10.7374	4.60095	0.0014389	0.023551	-0.865343	SIDT2	chr11	117049449 - 117068161	18712
TC07000268.hg.1	0.422666	8.98689	3.58946	0.00625942	0.0487098	-2.35832	UBE2D4	chr7	43966035 - 43995735	29700
TC10000240.hg.1	0.42355	8.8541	3.98051	0.00348542	0.0362382	-1.76472	CCNY	chr10	35535953 - 35860852	324899
TC11000327.hg.1	0.42373	8.19925	4.92264	0.000929838	0.0194505	-0.421755	CAT	chr11	34460472 - 34493609	33137
TC15001634.hg.1	0.425492	10.0645	4.9621	0.000882266	0.0189381	-0.368453	NPTN	chr15	73852344 - 73925756	73412
TC06000916.hg.1	0.427435	8.10187	6.43592	0.000144715	0.0091627	1.4519	NT5DC1	chr6	116421999 - 116566855	144856
TC03000248.hg.1	0.428652	9.14163	5.90972	0.000266931	0.0117922	0.839416	LIMD1	chr3	45596886 - 45727830	130944
TC04001697.hg.1	0.428743	7.98746	4.75916	0.00115865	0.0215693	-0.645183	NAF1	chr4	164031225 - 164088073	56848
TC04000027.hg.1	0.42891	8.63381	7.4382	4.93775e-05	0.00720593	2.51278	CRIPAK	chr4	1385340 - 1389782	4442
TC01000344.hg.1	0.429138	9.63789	4.30342	0.00218402	0.0284056	-1.28964	DHDDS	chr1	26758773 - 26797795	39022
TC11001541.hg.1	0.429198	8.87608	3.93567	0.00372349	0.0373787	-1.83182	FBXO3	chr11	33762485 - 33796089	33604
TC12000514.hg.1	0.429436	9.08525	3.66595	0.00557312	0.0460372	-2.24079	RBMS2	chr12	56915609 - 56989980	74371
TC17000319.hg.1	0.429764	9.16495	3.55937	0.00655339	0.0499481	-2.40474	TMEM97	chr17	26646121 - 26655711	9590
TC12000497.hg.1	0.429968	9.20998	5.19601	0.000649202	0.0167567	-0.0574249	RAB5B	chr12	56367697 - 56390467	22770
TC11003493.hg.1	0.430589	9.57184	4.9201	0.000933	0.0194505	-0.425201	ALG9	chr11	111652919 - 111742305	89386
TC16000091.hg.1	0.431644	9.68192	5.20463	0.000642	0.0167211	-0.0461262	PAQR4	chr16	3019246 - 3023490	4244
TC16000492.hg.1	0.432241	9.35157	4.45216	0.00176994	0.0259306	-1.07588	GPR114	chr16	57576550 - 57625593	49043
TC01000846.hg.1	0.432845	8.32722	5.71898	0.000336211	0.0125789	0.607323	CDC7	chr1	91966404 - 91991321	24917
TC04001278.hg.1	0.432848	8.8764	6.96882	8.05612e-05	0.00778325	2.03248	COX18	chr4	73920416 - 73935472	15056
TC05000134.hg.1	0.433242	9.88318	3.99794	0.00339729	0.0356542	-1.73871	C5orf22	chr5	31532373 - 31555165	22792
TC06001876.hg.1	0.434381	7.93494	3.86968	0.00410589	0.039071	-1.93105	SLC17A5	chr6	74303102 - 74363878	60776
TC07000093.hg.1	0.435361	7.79685	7.76988	3.54265e-05	0.0060884	2.83566	TMEM106B	chr7	12250848 - 12276890	26042
TC06001341.hg.1	0.435686	9.07741	3.82514	0.00438739	0.0405448	-1.99833	HIST1H4B, HIST2H4B, HIST4H4, HIST2H4A, HIST1H4L, HIST1H4E, HIST1H4H, HIST1H4C, HIST1H4J, HIST1H4K, HIST1H4F, HIST1H4D, HIST1H4A, HIST1H4I	chr6	26027043 - 26027480	437
TC02004954.hg.1	0.436108	9.53578	5.76121	0.000319335	0.012468	0.659176	BRE	chr2	28112808 - 28561768	448960
TC01002498.hg.1	0.436801	8.85539	4.17488	0.00262596	0.0312557	-1.47701	PSMB2	chr1	36035413 - 36107445	72032
TC0X000360.hg.1	0.437626	7.93545	8.16433	2.42067e-05	0.00545172	3.2028	YIPF6	chrX	67718165 - 67757127	38962
TC10000090.hg.1	0.437642	7.94883	4.77766	0.00112995	0.0212531	-0.619695	SEC61A2	chr10	12171636 - 12211960	40324
TC19000578.hg.1	0.437768	10.2293	3.59788	0.00617971	0.0483187	-2.34536	CCDC97	chr19	41816094 - 41830788	14694
TC04000870.hg.1	0.4378	8.79118	6.23602	0.000181862	0.00985312	1.22394	SPCS3	chr4	177241090 - 177253396	12306
TC03001270.hg.1	0.438153	8.5136	5.52361	0.000428008	0.0141674	0.363903	CMTM6	chr3	32522804 - 32544900	22096
TC0X000180.hg.1	0.43971	9.56285	6.03268	0.000230623	0.0112243	0.986145	MID1IP1	chrX	38660685 - 38665790	5105
TC11000617.hg.1	0.440221	9.16924	4.17126	0.00263971	0.0312706	-1.48232	MRPL49	chr11	64889655 - 64894843	5188
TC12002037.hg.1	0.440295	9.69136	4.68994	0.00127327	0.022362	-0.741035	PXN	chr12	120648242 - 120703574	55332
TC03001693.hg.1	0.44085	9.54489	5.14782	0.000691111	0.0172259	-0.120807	RABL3	chr3	120405528 - 120461840	56312
TC19001653.hg.1	0.440927	10.4253	4.85171	0.00102248	0.0204247	-0.518185	PRKD2	chr19	47177573 - 47220384	42811
TC11000399.hg.1	0.441145	9.72134	6.25059	0.000178828	0.0098514	1.24075	ATG13	chr11	46638826 - 46697568	58742
TC15001646.hg.1	0.441566	9.97889	4.61935	0.00140284	0.0233523	-0.839543	EDC3	chr15	74922899 - 74988386	65487
TC12000060.hg.1	0.441857	11.7536	6.80383	9.62396e-05	0.00824931	1.85686	CCND2	chr12	4382902 - 4414522	31620
TC17001875.hg.1	0.442029	9.2223	5.638	0.000371358	0.0132879	0.507138	MIF4GD	chr17	73262310 - 73267311	5001
TC12000272.hg.1	0.443054	8.03591	3.75053	0.00490588	0.0433459	-2.11159	KLHDC5	chr12	27932953 - 27955973	23020
TC11000471.hg.1	0.443612	10.3868	3.67657	0.00548435	0.0457137	-2.22453	ZDHHC5	chr11	57435219 - 57468659	33440
TC07001737.hg.1	0.444532	8.26731	8.92527	1.20813e-05	0.00495591	3.86293	SYPL1	chr7	105730949 - 105753057	22108
TC15000430.hg.1	0.444609	8.66897	4.20277	0.00252253	0.0306925	-1.43615	PIGB	chr15	55611133 - 55647846	36713
TC14000974.hg.1	0.446052	9.22251	4.04085	0.00319028	0.0345987	-1.67484	CIDEB	chr14	24774302 - 24780655	6353
TC16000077.hg.1	0.4464	9.99518	4.23571	0.00240594	0.0299731	-1.38804	PDPK1	chr16	2587965 - 2653189	65224
TC17001574.hg.1	0.447078	8.89527	6.65507	0.000113279	0.00862661	1.69536	C17orf65	chr17	42253342 - 42264082	10740
TC20000040.hg.1	0.448703	10.8913	6.29134	0.000170634	0.00975074	1.2876	CDC25B	chr20	3767578 - 3786762	19184
TC17001808.hg.1	0.45085	10.3844	3.95481	0.00361983	0.0367886	-1.80315	GNA13	chr17	63005407 - 63052920	47513
TC01003392.hg.1	0.455203	10.6511	5.19872	0.00064693	0.0167567	-0.0538746	TAGLN2	chr1	159887897 - 159895522	7625
TC02000587.hg.1	0.456779	8.83205	4.77956	0.00112704	0.0212531	-0.617075	CNNM3	chr2	97481982 - 97501121	19139
TC14000429.hg.1	0.45765	10.1642	3.94206	0.00368852	0.0372288	-1.82224	PCNX	chr14	71374122 - 71582099	207977
TC03001449.hg.1	0.45806	9.68788	5.8476	0.000287613	0.0121008	0.764423	WDR82	chr3	52288437 - 52322036	33599
TC15000954.hg.1	0.458091	8.27931	6.14969	0.000201029	0.0104124	1.12372	LRRC28	chr15	99791567 - 99930934	139367
TC03001174.hg.1	0.460233	10.4576	5.33777	0.000541111	0.0154992	0.126935	RAF1	chr3	12625100 - 12705725	80625
TC02002415.hg.1	0.461355	8.92184	5.91925	0.000263907	0.0117036	0.850859	MMADHC	chr2	150426147 - 150444330	18183
TC16001145.hg.1	0.461409	9.00553	6.32241	0.000164662	0.00974901	1.32316	ZNF319	chr16	58028573 - 58033762	5189
TC08000160.hg.1	0.46226	10.6332	4.45879	0.00175356	0.0257557	-1.06642	XPO7	chr8	21777180 - 21864096	86916
TC09001671.hg.1	0.462577	8.94255	4.18889	0.00257343	0.0311	-1.45647	MED27	chr9	134735494 - 134955295	219801
TC07000932.hg.1	0.463387	11.037	6.4287	0.000145902	0.0091627	1.44377	CASP2	chr7	142985308 - 143004789	19481
TC17001300.hg.1	0.463582	9.43872	4.96195	0.000882445	0.0189381	-0.36866	PIGS	chr17	26880405 - 26898887	18482
TC18000412.hg.1	0.464167	8.15743	4.4066	0.00188701	0.0266468	-1.14101	TMEM241	chr18	20777719 - 21017925	240206
TC01003754.hg.1	0.46519	10.0515	4.28776	0.00223332	0.0287578	-1.31234	SLC41A1	chr1	205758221 - 205782876	24655
TC17002887.hg.1	0.465383	9.67313	5.02108	0.000815997	0.0184136	-0.289229	PLSCR3	chr17	7293047 - 7298162	5115
TC20000021.hg.1	0.465746	9.00252	6.09157	0.000215175	0.0106991	1.05563	STK35	chr20	2082257 - 2157684	75427
TC12000848.hg.1	0.466891	9.63926	6.66548	0.000111986	0.00862661	1.70675	UBE3B	chr12	109915207 - 109974507	59300
TC09000702.hg.1	0.466949	9.38636	3.91597	0.00383353	0.0379259	-1.86139	TBC1D13	chr9	131549483 - 131572711	23228
TC02002429.hg.1	0.46709	7.92156	7.15663	6.60415e-05	0.00729377	2.22805	ARL5A	chr2	152645498 - 152685009	39511
TC19001101.hg.1	0.468107	9.0166	4.514	0.00162335	0.0247596	-0.987965	CD70	chr19	6583135 - 6591163	8028
TC01006351.hg.1	0.468301	7.7741	5.17892	0.000663738	0.0169568	-0.0798576	RRAGC	chr1	39303870 - 39325495	21625
TC12000379.hg.1	0.469033	11.2395	8.78875	1.36358e-05	0.00496971	3.74893	TMBIM6	chr12	50135293 - 50158717	23424
TC02000646.hg.1	0.46963	10.8237	5.14254	0.000695876	0.0172259	-0.12777	C2orf49	chr2	105953816 - 105965668	11852
TC0X000771.hg.1	0.469665	9.45539	5.08056	0.000754581	0.0176451	-0.20987	ATP6AP1	chrX	153656978 - 153664862	7884
TC0X001112.hg.1	0.469889	7.50281	4.62017	0.00140125	0.0233523	-0.838388	P2RY4	chrX	69478016 - 69479654	1638
TC01001847.hg.1	0.470237	7.86355	3.89299	0.00396627	0.0385412	-1.89594	CNIH4	chr1	224544552 - 224567161	22609
TC0X001355.hg.1	0.471852	10.1451	4.72108	0.00122027	0.0217871	-0.697832	ZDHHC9	chrX	128937264 - 128978124	40860
TC01002553.hg.1	0.472051	9.22797	6.8923	8.74532e-05	0.0080359	1.95148	PPT1	chr1	40538377 - 40563375	24998
TC14002340.hg.1	0.473036	8.96802	4.05629	0.00311914	0.0342796	-1.65193	TM9SF1	chr14	24657925 - 24664893	6968
TC16000548.hg.1	0.473653	10.6208	4.46591	0.00173617	0.0256877	-1.05629	NUTF2	chr16	67880635 - 67906470	25835
TC0X000252.hg.1	0.474036	8.90216	4.90521	0.00095173	0.0196156	-0.445379	PORCN	chrX	48367350 - 48379202	11852
TC14000340.hg.1	0.47433	8.07667	4.95902	0.000885877	0.0189482	-0.372598	AP5M1	chr14	57735606 - 57756797	21191
TC06004133.hg.1	0.474989	7.98123	5.598	0.000390182	0.0135972	0.457276	UNC5CL	chr6	40994640 - 41006938	12298
TC07000341.hg.1	0.47553	10.1209	5.96573	0.000249672	0.0114339	0.90653	SUMF2	chr7	56131695 - 56148365	16670
TC19001015.hg.1	0.475671	9.93312	4.23418	0.00241121	0.0299731	-1.39027	KLF16	chr19	1852398 - 1863564	11166
TC0X001118.hg.1	0.477149	8.42598	5.60682	0.000385941	0.013515	0.468296	SNX12	chrX	70209364 - 70293276	83912
TC04000152.hg.1	0.477466	8.35984	6.13985	0.000203351	0.0104394	1.11222	MED28	chr4	17616254 - 17629793	13539
TC12000725.hg.1	0.477535	8.98365	4.20675	0.00250811	0.0306144	-1.43033	MRPL42	chr12	93861264 - 93897548	36284
TC08000333.hg.1	0.477759	8.50455	5.41156	0.000492721	0.0147765	0.221667	HGSNAT	chr8	42995556 - 43057998	62442
TC20000391.hg.1	0.477819	9.98143	7.34965	5.40571e-05	0.00720593	2.42431	SLC9A8	chr20	48429250 - 48508779	79529
TC01002045.hg.1	0.477844	9.4548	7.86982	3.21227e-05	0.0060884	2.93038	ZNF672	chr1	249132409 - 249143716	11307
TC17000634.hg.1	0.477942	9.86438	5.45315	0.000467536	0.0145927	0.274688	UBE2Z	chr17	46985731 - 47006422	20691
TC12001135.hg.1	0.478631	9.1969	4.33697	0.00208229	0.0280389	-1.24114	TNFRSF1A	chr12	6437923 - 6451283	13360
TC08000588.hg.1	0.478947	10.2527	4.05216	0.00313799	0.0343593	-1.65805	PTDSS1	chr8	97273943 - 97349223	75280
TC05001690.hg.1	0.479389	7.78167	3.65745	0.00564534	0.0463663	-2.25382	TMED7-TICAM2, TICAM2, TMED7	chr5	114914339 - 114968689	54350
TC07000625.hg.1	0.479676	10.0021	3.8511	0.00422088	0.0396087	-1.95908	AGFG2	chr7	100136834 - 100165843	29009
TC03001664.hg.1	0.479847	11.0655	3.65903	0.0056318	0.0463373	-2.25139	NAA50	chr3	113435307 - 113465147	29840
TC22000547.hg.1	0.48045	10.6487	4.60952	0.00142198	0.023472	-0.853316	MAPK1	chr22	22108789 - 22221970	113181
TC07000659.hg.1	0.480764	9.25483	4.91884	0.000934563	0.0194505	-0.426901	ORAI2	chr7	102073553 - 102097268	23715
TC01001781.hg.1	0.481528	9.24487	5.60765	0.000385546	0.013515	0.469331	FLVCR1	chr1	213031597 - 213072705	41108
TC14001318.hg.1	0.481753	11.2794	6.37421	0.000155209	0.00949491	1.38214	TMED10	chr14	75598171 - 75643349	45178
TC10001584.hg.1	0.482369	8.21011	6.29434	0.000170047	0.00975074	1.29104	COX15	chr10	101468505 - 101492423	23918
TC20000867.hg.1	0.48285	10.2903	5.88435	0.000275177	0.0119299	0.80885	SERINC3	chr20	43124862 - 43150750	25888
TC09001283.hg.1	0.483099	8.50014	7.71902	3.72504e-05	0.00612449	2.787	C9orf64	chr9	86553226 - 86571901	18675
TC02000615.hg.1	0.483986	9.92126	4.73387	0.00119919	0.0217699	-0.680121	C2orf29	chr2	101869264 - 101886778	17514
TC01003417.hg.1	0.484975	9.53348	4.72213	0.00121851	0.0217871	-0.696368	DEDD	chr1	161090764 - 161102478	11714
TC03001435.hg.1	0.485757	10.1479	4.7002	0.00125553	0.0221521	-0.726778	CISH	chr3	50643885 - 50649262	5377
TC07000403.hg.1	0.486585	9.04901	4.33179	0.00209766	0.0281064	-1.24862	VKORC1L1	chr7	65338254 - 65424530	86276
TC22000722.hg.1	0.487533	11.3638	5.51323	0.000433594	0.0141888	0.350811	IL2RB	chr22	37515126 - 37571094	55968
TC01003279.hg.1	0.487704	9.95642	6.50665	0.000133633	0.00911248	1.5312	DENND4B	chr1	153901977 - 153919172	17195
TC01002754.hg.1	0.488509	7.68245	6.10832	0.000210989	0.0105826	1.07531	SLC35D1	chr1	67465015 - 67520080	55065
TC06001761.hg.1	0.489157	8.65015	3.60882	0.00607767	0.0479122	-2.32851	SLC35B2	chr6	44221833 - 44225291	3458
TC01002980.hg.1	0.489529	9.19624	5.3973	0.000501696	0.0149287	0.203418	DRAM2	chr1	111659954 - 111682838	22884
TC15000866.hg.1	0.48962	10.7886	3.6657	0.00557529	0.0460372	-2.24118	CRTC3	chr15	91073157 - 91188577	115420
TC02002789.hg.1	0.490054	9.83213	5.28612	0.000578046	0.0160373	0.0601222	CNPPD1	chr2	220036619 - 220042828	6209
TC01000391.hg.1	0.49476	10.1434	6.2629	0.000176307	0.0098514	1.25493	YTHDF2	chr1	29063133 - 29096287	33154
TC17000093.hg.1	0.495277	8.76289	4.26629	0.00230287	0.0292921	-1.34353	NLGN2	chr17	7311502 - 7323179	11677
TC16000001.hg.1	0.495407	8.8834	6.49322	0.000135664	0.00911248	1.5162	DDX11L10	chr16	61553 - 64093	2540
TC17001734.hg.1	0.499519	10.0574	5.97851	0.000245907	0.0114339	0.921781	MTMR4	chr17	56566893 - 56595251	28358
TC0X000724.hg.1	0.500658	8.85666	8.29267	2.14528e-05	0.00536237	3.31846	MTMR1	chrX	149861435 - 149933576	72141
TC14001334.hg.1	0.503321	9.40005	5.4192	0.000487989	0.0147765	0.23142	ANGEL1	chr14	77253586 - 77279283	25697
TC14001310.hg.1	0.503823	10.3189	4.13321	0.00278902	0.0323107	-1.53825	KIAA0317	chr14	75119880 - 75179818	59938
TC02001304.hg.1	0.50438	10.451	6.72157	0.000105285	0.00840586	1.76792	RQCD1	chr2	219433303 - 219461803	28500
TC06001727.hg.1	0.504483	9.6214	5.32103	0.000552795	0.0156389	0.105321	CCND3	chr6	41902671 - 42018095	115424
TC01006381.hg.1	0.505494	9.79091	3.81184	0.00447541	0.041027	-2.01848	SHC1	chr1	154934774 - 154946959	12185
TC03001028.hg.1	0.506622	9.07264	4.15191	0.00271453	0.0317829	-1.51073	ST6GAL1	chr3	186648274 - 186796341	148067
TC11003474.hg.1	0.507453	10.6952	8.29153	2.14756e-05	0.00536237	3.31745	PSMA1	chr11	14526420 - 14665180	138760
TC18001000.hg.1	0.507579	8.77462	6.14875	0.00020125	0.0104124	1.12262	HMSD	chr18	61616535 - 61636020	19485
TC14002293.hg.1	0.507792	9.28638	3.91104	0.00386159	0.038105	-1.86879	KIAA0391	chr14	35591052 - 35743497	152445
TC12001633.hg.1	0.507853	10.449	3.70108	0.00528505	0.0447483	-2.18703	CDK4	chr12	58141510 - 58146304	4794
TC03001778.hg.1	0.50858	8.72075	6.56363	0.00012538	0.00894482	1.59459	PIK3R4	chr3	130397778 - 130465696	67918
TC14000417.hg.1	0.508868	10.0469	3.89919	0.00392994	0.0384819	-1.8866	KIAA0247	chr14	70078310 - 70181861	103551
TC01000554.hg.1	0.50887	9.59471	4.76908	0.00114317	0.0213503	-0.631514	DPH2	chr1	44435653 - 44439045	3392
TC02000167.hg.1	0.50917	10.5923	5.56764	0.000405161	0.0137958	0.419271	C2orf28	chr2	27434895 - 27440046	5151
TC07000796.hg.1	0.509386	8.01695	5.22989	0.000621393	0.0163819	-0.0130837	AHCYL2	chr7	128864855 - 129070052	205197
TC13000354.hg.1	0.509442	8.78732	4.05467	0.00312654	0.0342993	-1.65434	FKSG29	chr13	100003674 - 100004281	607
TC01001094.hg.1	0.511893	9.46406	3.8405	0.00428809	0.039978	-1.9751	PEX11B	chr1	145516165 - 145523732	7567
TC01002694.hg.1	0.513233	11.4536	4.71946	0.00122296	0.0217871	-0.700073	DHCR24	chr1	55315300 - 55352921	37621
TC05000517.hg.1	0.513312	7.83656	7.82798	3.34626e-05	0.0060884	2.89087	SLC25A46	chr5	110073837 - 110100857	27020
TC16000576.hg.1	0.515954	9.66748	3.77053	0.00476083	0.0425616	-2.08117	PDPR	chr16	70147529 - 70195205	47676
TC03001588.hg.1	0.515981	9.99133	3.7746	0.00473185	0.0424476	-2.07498	CGGBP1	chr3	88101094 - 88199035	97941
TC10001408.hg.1	0.516317	9.17476	4.56559	0.00151104	0.0241413	-0.915072	ANXA7	chr10	75135189 - 75173841	38652
TC20000056.hg.1	0.51696	10.226	8.05149	2.69522e-05	0.00573284	3.09959	CDS2	chr20	5107407 - 5178533	71126
TC01003330.hg.1	0.51821	9.94524	3.60651	0.00609908	0.0479702	-2.33207	UBQLN4	chr1	156005092 - 156023585	18493
TC01001198.hg.1	0.519325	9.56732	7.48276	4.71923e-05	0.00703963	2.55694	PRUNE	chr1	150980896 - 151008189	27293
TC15001556.hg.1	0.520113	10.6421	5.94704	0.000255293	0.0115445	0.884182	SPG21	chr15	65255362 - 65282284	26922
TC03000832.hg.1	0.520163	10.3998	4.61316	0.00141487	0.0234317	-0.848218	MBNL1	chr3	151961617 - 152183569	221952
TC17001731.hg.1	0.522727	11.0889	5.96458	0.000250013	0.0114339	0.905159	SUPT4H1	chr17	56422539 - 56429563	7024
TC01000808.hg.1	0.52277	8.02161	3.7637	0.00480983	0.0428262	-2.09155	PRKACB	chr1	84543636 - 84704181	160545
TC17001784.hg.1	0.523057	9.0563	5.22746	0.000623342	0.0163838	-0.016256	STRADA	chr17	61780192 - 61819330	39138
TC14000361.hg.1	0.523553	10.2976	8.06035	2.67248e-05	0.00573284	3.10774	C14orf135	chr14	60558629 - 60635851	77222
TC11003485.hg.1	0.524053	8.75163	3.86756	0.00411884	0.039071	-1.93425	INTS5	chr11	62414320 - 62420774	6454
TC05000727.hg.1	0.524449	9.74551	4.53923	0.00156734	0.0243605	-0.952264	SLC35A4	chr5	139944041 - 139948688	4647
TC12003283.hg.1	0.526236	8.46824	8.93783	1.19485e-05	0.00495591	3.87332	TMBIM4	chr12	66529626 - 66563852	34226
TC08001496.hg.1	0.526438	7.4683	4.59289	0.00145502	0.0237055	-0.876666	RRM2B	chr8	103216729 - 103251346	34617
TC18000556.hg.1	0.527852	8.98806	3.87682	0.00406254	0.0389827	-1.92028	KDSR	chr18	60994971 - 61034743	39772
TC12000499.hg.1	0.527945	9.18073	5.73716	0.00032883	0.0124741	0.629679	IKZF4	chr12	56401443 - 56432219	30776
TC12000868.hg.1	0.52813	9.77383	4.33003	0.00210291	0.0281064	-1.25116	SH2B3	chr12	111843752 - 111889427	45675
TC05000713.hg.1	0.529171	9.92382	6.35829	0.000158049	0.00949491	1.36406	UBE2D2	chr5	138906016 - 139008018	102002
TC14000358.hg.1	0.529247	7.86374	9.41532	7.9203e-06	0.00465858	4.25708	JKAMP	chr14	59951161 - 59972081	20920
TC07001724.hg.1	0.529475	8.87958	4.1277	0.00281138	0.0323239	-1.54636	ORC5	chr7	103766788 - 103848495	81707
TC17001794.hg.1	0.530626	8.97292	3.64086	0.00578904	0.0469919	-2.27927	ICAM2	chr17	62079955 - 62097994	18039
TC07003341.hg.1	0.530659	9.46839	5.34209	0.000538142	0.0154527	0.1325	ARF5	chr7	127228399 - 127231759	3360
TC01002289.hg.1	0.530943	11.3166	4.87973	0.000984746	0.0200181	-0.480002	RCC2	chr1	17733251 - 17766250	32999
TC04001459.hg.1	0.532257	10.6591	11.1188	2.08339e-06	0.00199415	5.46348	LEF1	chr4	108968701 - 109090112	121411
TC03000583.hg.1	0.532598	7.8365	5.5965	0.000390906	0.0135972	0.455405	ATP6V1A	chr3	113465664 - 113530905	65241
TC17000538.hg.1	0.534433	11.1387	3.9033	0.00390608	0.0383136	-1.88042	PSME3	chr17	40976443 - 40995777	19334
TC05001689.hg.1	0.535201	8.61033	4.50789	0.00163724	0.0248748	-0.996628	FEM1C	chr5	114856606 - 114880591	23985
TC15000198.hg.1	0.536889	9.88034	8.39885	1.94346e-05	0.00531491	3.4128	KLF13	chr15	31619058 - 31670102	51044
TC02001682.hg.1	0.537178	10.1219	6.44627	0.000143032	0.0091627	1.46355	GTF3C2	chr2	27548716 - 27579868	31152
TC02002644.hg.1	0.537342	9.31779	5.32272	0.000551605	0.0156389	0.107502	PGAP1	chr2	197697728 - 197792520	94792
TC02002226.hg.1	0.538562	8.92749	5.79394	0.000306887	0.0123509	0.699187	DDX11L2	chr2	114356605 - 114361294	4689
TC12001002.hg.1	0.540813	9.79511	7.11212	6.92023e-05	0.00731756	2.18211	BRI3BP	chr12	125478194 - 125515684	37490
TC17001982.hg.1	0.541105	10.0569	7.37875	5.24672e-05	0.00720593	2.4535	C17orf62	chr17	80400463 - 80408707	8244
TC17000332.hg.1	0.541227	10.0514	5.67599	0.000354394	0.0128428	0.554265	ERAL1	chr17	27182020 - 27188085	6065
TC12000788.hg.1	0.541286	8.95179	6.20579	0.000188335	0.0100935	1.18897	CHPT1	chr12	102090725 - 102123424	32699
TC16000871.hg.1	0.543953	10.1278	4.22288	0.00245064	0.0302049	-1.40676	TXNDC11	chr16	11772941 - 11836704	63763
TC14000131.hg.1	0.54409	11.1559	8.58107	1.64417e-05	0.00496971	3.57188	OXA1L	chr14	23235731 - 23241007	5276
TC13000437.hg.1	0.544299	9.87878	7.91512	3.07383e-05	0.0060884	2.97292	CHAMP1	chr13	115079965 - 115092803	12838
TC12001426.hg.1	0.54474	11.7535	4.46308	0.00174305	0.0257005	-1.06031	SLC38A1	chr12	46576841 - 46663208	86367
TC01000302.hg.1	0.545028	9.87647	7.29536	5.71661e-05	0.00720593	2.36959	LYPLA2	chr1	24117460 - 24122029	4569
TC17001925.hg.1	0.545852	10.1083	4.2374	0.00240011	0.0299731	-1.38558	CANT1	chr17	76987798 - 77005899	18101
TC09001042.hg.1	0.549947	10.3936	5.08373	0.000751453	0.0176169	-0.205659	SIGMAR1	chr9	34634719 - 34637806	3087
TC14002213.hg.1	0.553142	9.84641	6.36898	0.000156136	0.00949491	1.3762	IGHM	chr14	106320349 - 106322323	1974
TC03000017.hg.1	0.556167	10.4364	5.70755	0.000340942	0.0126325	0.59325	EDEM1	chr3	5229331 - 5261650	32319
TC0X000966.hg.1	0.556237	10.2127	9.21662	9.37802e-06	0.00465858	4.10004	MED14	chrX	40507558 - 40595136	87578
TC10000619.hg.1	0.556796	7.56754	4.2225	0.00245198	0.0302049	-1.40732	MINPP1	chr10	89264223 - 89313218	48995
TC08001225.hg.1	0.556871	7.79121	4.01689	0.00330415	0.0352735	-1.71047	TMEM68	chr8	56608983 - 56685966	76983
TC02005053.hg.1	0.558009	8.89714	6.72071	0.000105384	0.00840586	1.76699	NHEJ1	chr2	219940039 - 220025587	85548
TC10000575.hg.1	0.559699	7.62571	6.86668	8.99039e-05	0.00813099	1.92418	C10orf57	chr10	81838402 - 81852313	13911
TC22000838.hg.1	0.560953	9.3592	7.51354	4.57455e-05	0.00700578	2.5873	NAGA	chr22	42428724 - 42466846	38122
TC11001089.hg.1	0.560997	10.7401	6.94465	8.26708e-05	0.00778325	2.00699	CBL	chr11	119076752 - 119178859	102107
TC11000249.hg.1	0.561502	9.25976	5.18045	0.000662427	0.0169568	-0.0778545	ZDHHC13	chr11	19138676 - 19197967	59291
TC01002147.hg.1	0.563194	9.57782	6.16556	0.000197345	0.0103977	1.14223	ICMT	chr1	6281252 - 6296044	14792
TC03001903.hg.1	0.563853	10.2476	4.41457	0.00186595	0.0265251	-1.12959	GPR171	chr3	150915619 - 150920988	5369
TC01003420.hg.1	0.564728	9.87881	3.60769	0.00608819	0.0479622	-2.33026	B4GALT3	chr1	161141100 - 161147758	6658
TC15000729.hg.1	0.565475	9.68537	4.32799	0.00210902	0.0281064	-1.25411	IREB2	chr15	78730518 - 78793798	63280
TC12000993.hg.1	0.565587	11.188	6.60383	0.000119894	0.00877108	1.63904	ATP6V0A2	chr12	124196865 - 124246301	49436
TC02002105.hg.1	0.566989	9.62778	4.96083	0.000883756	0.0189381	-0.370165	TMEM127	chr2	96915946 - 96931751	15805
TC01000508.hg.1	0.569268	10.2335	3.57979	0.00635237	0.0491998	-2.37323	ZMPSTE24	chr1	40723733 - 40759856	36123
TC02000501.hg.1	0.569719	10.0332	5.0995	0.000736092	0.0175371	-0.184719	KCMF1	chr2	85198216 - 85286595	88379
TC17000376.hg.1	0.569997	9.83826	4.94116	0.00090718	0.0192961	-0.396716	PSMD11	chr17	30771502 - 30809398	37896
TC19000716.hg.1	0.57172	9.84711	3.7407	0.00497891	0.0436809	-2.12657	BAX	chr19	49458072 - 49465055	6983
TC21000133.hg.1	0.571986	7.83764	8.21925	2.2983e-05	0.00543531	3.25252	FLJ46020	chr21	35321230 - 35336260	15030
TC10000721.hg.1	0.572037	11.796	7.29821	5.69977e-05	0.00720593	2.37247	SCD	chr10	102106772 - 102124591	17819
TC07001274.hg.1	0.573323	7.49367	3.98034	0.00348627	0.0362382	-1.76497	DPY19L1	chr7	34961081 - 35077883	116802
TC02000769.hg.1	0.575309	8.91597	5.10419	0.000731589	0.0175371	-0.178498	TSN	chr2	122494679 - 122525429	30750
TC05000608.hg.1	0.576601	10.2532	3.72746	0.00507905	0.0440952	-2.14675	PRRC1	chr5	126853301 - 126890782	37481
TC01001002.hg.1	0.576969	9.80221	5.8092	0.000301267	0.0122708	0.717779	DCLRE1B	chr1	114447763 - 114456708	8945
TC02002455.hg.1	0.578152	8.75748	3.99051	0.00343455	0.035863	-1.74979	ACVR1	chr2	158592958 - 158732374	139416
TC04002924.hg.1	0.578237	9.84139	6.13254	0.000205094	0.0104394	1.10368	SLC39A8	chr4	103172198 - 103274157	101959
TC09000893.hg.1	0.579098	8.95135	5.02874	0.000807786	0.0183002	-0.278969	ERMP1	chr9	5765076 - 5833117	68041
TC01001367.hg.1	0.580152	9.44995	4.36016	0.00201496	0.0273607	-1.20772	NCSTN	chr1	160313062 - 160328742	15680
TC06000696.hg.1	0.580187	9.7973	4.89742	0.000961692	0.019657	-0.455951	FKBP1C	chr6	63921351 - 63922929	1578
TC02001789.hg.1	0.582278	9.11712	4.28438	0.00224413	0.0287897	-1.31725	THADA	chr2	43393800 - 43823185	429385
TC09001588.hg.1	0.583296	8.98705	5.1485	0.000690497	0.0172259	-0.119907	PPP6C	chr9	127908852 - 127952218	43366
TC0X000657.hg.1	0.583967	8.55035	5.63069	0.000374725	0.013293	0.498038	SLC9A6	chrX	135067583 - 135129428	61845
TC17002850.hg.1	0.584117	9.26418	3.87244	0.00408906	0.039071	-1.92688	VAMP2	chr17	8062465 - 8066864	4399
TC11000575.hg.1	0.584423	9.87113	3.76649	0.00478977	0.0427138	-2.08731	RTN3	chr11	63448918 - 63527363	78445
TC02005005.hg.1	0.584493	8.29715	4.64348	0.00135702	0.0231839	-0.805782	MOB4, HSPE1-MOB4	chr2	198380295 - 198418423	38128
TC05001172.hg.1	0.584936	9.97201	7.717	3.73249e-05	0.00612449	2.78507	ANKH	chr5	14704909 - 14871887	166978
TC09000707.hg.1	0.585847	9.3584	4.28242	0.00225041	0.0288163	-1.32009	DOLPP1	chr9	131843379 - 131852717	9338
TC01003196.hg.1	0.586337	9.50197	3.59652	0.00619247	0.0483676	-2.34745	SF3B4	chr1	149895209 - 149900522	5313
TC12001138.hg.1	0.58793	10.8964	6.70132	0.000107652	0.00852604	1.74589	VAMP1	chr12	6571403 - 6580153	8750
TC08000203.hg.1	0.588213	8.88279	3.89242	0.00396961	0.0385412	-1.89679	DPYSL2	chr8	26371547 - 26515694	144147
TC09001050.hg.1	0.58904	9.19162	4.17758	0.00261574	0.0311663	-1.47304	PIGO	chr9	35088685 - 35096598	7913
TC01000837.hg.1	0.590633	10.7603	5.82525	0.000295475	0.012208	0.737305	LRRC8B	chr1	89990395 - 90063423	73028
TC18001006.hg.1	0.591889	9.52647	5.12675	0.000710351	0.0173598	-0.148636	PSMG2	chr18	12658738 - 12725739	67001
TC20000928.hg.1	0.59348	10.3663	7.12515	6.82604e-05	0.00731756	2.19558	B4GALT5	chr20	48249482 - 48330421	80939
TC10000428.hg.1	0.59421	11.1556	3.62482	0.00593169	0.04755	-2.30391	EIF4EBP2	chr10	72163861 - 72188374	24513
TC06001561.hg.1	0.59615	8.81001	4.45919	0.00175259	0.0257557	-1.06586	AGPAT1	chr6	32135983 - 32145888	9905
TC19000320.hg.1	0.596186	10.3678	3.63196	0.00586772	0.0472958	-2.29294	AP1M1	chr19	16308665 - 16346156	37491
TC01001201.hg.1	0.598256	8.99054	5.39248	0.000504769	0.0149693	0.197245	MLLT11	chr1	151030234 - 151040973	10739
TC05002041.hg.1	0.599055	9.79996	4.4893	0.00168028	0.0252284	-1.02301	PANK3	chr5	167975500 - 168006614	31114
TC02001178.hg.1	0.599089	8.71292	4.65261	0.00134011	0.0230082	-0.793036	STRADB	chr2	202252581 - 202345574	92993
TC14000280.hg.1	0.601633	11.5605	5.78645	0.000309687	0.0123509	0.690049	ARF6	chr14	50359736 - 50363772	4036
TC12000462.hg.1	0.603708	9.07077	5.01637	0.000821081	0.018492	-0.29553	COPZ1	chr12	54718911 - 54745633	26722
TC03001811.hg.1	0.603717	10.2966	13.444	4.39082e-07	0.000983438	6.77749	MSL2	chr3	135867760 - 135916083	48323
TC01003309.hg.1	0.605202	9.20106	4.54145	0.00156251	0.0243605	-0.94913	FAM189B	chr1	155216996 - 155225274	8278
TC14000322.hg.1	0.605496	9.87918	4.96729	0.000876204	0.0189381	-0.361457	MAPK1IP1L	chr14	55518349 - 55536912	18563
TC13000356.hg.1	0.605807	10.5813	5.51654	0.000431803	0.0141845	0.354991	TM9SF2	chr13	100153671 - 100215645	61974
TC07001298.hg.1	0.608023	8.71267	3.56313	0.00651588	0.0499481	-2.39893	TRGV5	chr7	38388711 - 38389623	912
TC01000001.hg.1	0.608754	9.47789	6.97721	7.98423e-05	0.00778325	2.04132	DDX11L1	chr1	11869 - 14409	2540
TC16000328.hg.1	0.610623	10.4004	5.92513	0.000262056	0.0116666	0.857928	MAZ	chr16	29817427 - 29822877	5450
TC01001913.hg.1	0.610693	8.29917	5.73331	0.000330377	0.0124826	0.624951	ARV1	chr1	231114727 - 231136479	21752
TC14002306.hg.1	0.612101	8.80334	5.13635	0.000701516	0.0172773	-0.135951	UBR7	chr14	93673401 - 93695561	22160
TC17001591.hg.1	0.612242	9.42727	5.48114	0.000451381	0.0144417	0.310212	DCAKD	chr17	43100706 - 43138473	37767
TC17001711.hg.1	0.613273	8.46843	6.07118	0.000220392	0.0108645	1.03163	MMD	chr17	53469974 - 53499341	29367
TC20000582.hg.1	0.615786	8.80317	4.92193	0.000930723	0.0194505	-0.422722	RNF24	chr20	3912068 - 3996229	84161
TC22000550.hg.1	0.619247	8.2843	5.87478	0.000278358	0.0119299	0.797301	ZNF280B	chr22	22838767 - 22863505	24738
TC12002009.hg.1	0.622374	9.44668	4.53155	0.00158416	0.0244566	-0.963122	C12orf49	chr12	117153593 - 117175874	22281
TC05001819.hg.1	0.625518	9.78172	7.66393	3.93431e-05	0.00627632	2.73396	HNRNPA0	chr5	137086116 - 137090065	3949
TC02001677.hg.1	0.627576	9.46372	5.20135	0.000644734	0.0167543	-0.05043	SLC5A6	chr2	27422455 - 27435826	13371
TC01003949.hg.1	0.630308	8.39919	8.23463	2.26528e-05	0.00543531	3.26638	ABCB10	chr1	229652329 - 229694442	42113
TC09001070.hg.1	0.631399	10.517	3.6874	0.00539534	0.0452342	-2.20796	RNF38	chr9	36336393 - 36487545	151152
TC01001588.hg.1	0.633928	7.81662	4.3833	0.00195009	0.0270844	-1.17444	TSEN15	chr1	184020811 - 184043346	22535
TC01002632.hg.1	0.634263	9.15371	4.82972	0.00105319	0.0207256	-0.548241	MGC12982	chr1	47897805 - 47900313	2508
TC0X000326.hg.1	0.634694	9.2182	4.53404	0.00157869	0.0244049	-0.959602	APEX2	chrX	55026780 - 55035490	8710
TC01002615.hg.1	0.637181	7.45376	6.1029	0.000212332	0.0106037	1.06895	IPP	chr1	46159996 - 46216485	56489
TC01001989.hg.1	0.638421	9.1363	4.54524	0.00155431	0.0243605	-0.943777	DESI2	chr1	244816237 - 244872335	56098
TC19001776.hg.1	0.639563	11.0309	3.67627	0.00548686	0.0457137	-2.22499	NKG7	chr19	51874874 - 51875960	1086
TC06002233.hg.1	0.640903	10.7471	5.76953	0.000316118	0.012468	0.669365	ZBTB2	chr6	151685250 - 151712683	27433
TC07001130.hg.1	0.641494	9.57613	8.92732	1.20596e-05	0.00495591	3.86462	FAM220A	chr7	6369040 - 6388612	19572
TC10001702.hg.1	0.641706	10.0484	6.96213	8.1139e-05	0.00778325	2.02543	PRDX3	chr10	120927211 - 120938345	11134
TC02001363.hg.1	0.64289	11.6453	5.26089	0.000597074	0.0162898	0.0273384	AGFG1	chr2	228336868 - 228425938	89070
TC08002582.hg.1	0.642969	7.6482	5.23455	0.000617666	0.0163819	-0.00699205	FUT10	chr8	33228342 - 33330940	102598
TC0X000747.hg.1	0.643833	9.5207	6.65227	0.000113631	0.00862661	1.69229	ZNF275	chrX	152599613 - 152625568	25955
TC15002056.hg.1	0.644065	9.64715	7.31712	5.58966e-05	0.00720593	2.39157	DDX11L9, DDX11L1	chr15	102516761 - 102519296	2535
TC02002229.hg.1	0.644771	8.21897	4.10272	0.00291518	0.0329079	-1.58321	SLC35F5	chr2	114462588 - 114514400	51812
TC17001459.hg.1	0.64482	10.1444	3.84288	0.00427288	0.0398687	-1.9715	NR1D1	chr17	38249037 - 38256978	7941
TC10001623.hg.1	0.645358	10.0123	3.84438	0.00426332	0.0398687	-1.96923	ACTR1A	chr10	104238986 - 104262512	23526
TC12001815.hg.1	0.647969	8.24278	3.90732	0.00388291	0.0382552	-1.87438	UBE2N	chr12	93799449 - 93836038	36589
TC01000905.hg.1	0.649091	9.11758	5.40919	0.000494203	0.0147823	0.218631	SLC30A7	chr1	101361632 - 101447311	85679
TC03000636.hg.1	0.651454	8.02197	10.5651	3.1498e-06	0.00258418	5.09714	DIRC2	chr3	122513642 - 122599986	86344
TC0X000730.hg.1	0.653171	7.72791	5.47219	0.000456481	0.0144838	0.298863	VMA21	chrX	150564987 - 150577836	12849
TC07001300.hg.1	0.654766	8.03827	4.47209	0.00172119	0.0256083	-1.04748	TRGV3	chr7	38397535 - 38398763	1228
TC02000952.hg.1	0.65539	8.3003	4.50608	0.00164137	0.0249046	-0.999191	GPD2	chr2	157291802 - 157470247	178445
TC16000615.hg.1	0.655611	9.85518	7.6301	4.06923e-05	0.00640263	2.70121	ZNRF1	chr16	75032915 - 75144892	111977
TC16001158.hg.1	0.655751	10.2382	6.31092	0.000166844	0.00975074	1.31002	GOT2	chr16	58741035 - 58768246	27211
TC11001929.hg.1	0.657823	10.3384	3.73659	0.00500975	0.0437908	-2.13283	SYVN1	chr11	64894751 - 64902004	7253
TC17000617.hg.1	0.6581	8.89883	6.50133	0.000134433	0.00911248	1.52527	PNPO	chr17	46018889 - 46026674	7785
TC03001683.hg.1	0.658607	9.49626	4.77089	0.00114036	0.0213325	-0.629013	TMEM39A	chr3	119148347 - 119187677	39330
TC03002022.hg.1	0.659638	10.2254	3.904	0.00390205	0.0383068	-1.87937	TBL1XR1	chr3	176737143 - 176915261	178118
TC08001507.hg.1	0.660434	9.86203	3.86886	0.00411087	0.039071	-1.93228	SLC25A32	chr8	104410863 - 104427468	16605
TC11002363.hg.1	0.661027	10.3749	5.92584	0.000261836	0.0116666	0.858772	DPAGT1	chr11	118967213 - 118979041	11828
TC15001650.hg.1	0.661807	10.7074	5.56963	0.000404161	0.0137958	0.421764	SCAMP2	chr15	75136071 - 75165719	29648
TC09000193.hg.1	0.662485	9.23822	5.41519	0.000490469	0.0147765	0.226297	RGP1	chr9	35749203 - 35758572	9369
TC16001132.hg.1	0.668428	9.75855	5.64639	0.000367537	0.0132336	0.517562	AMFR	chr16	56395364 - 56459450	64086
TC17001374.hg.1	0.66888	8.45568	5.56048	0.000408784	0.0137958	0.410286	PEX12	chr17	33897849 - 33905656	7807
TC09000572.hg.1	0.668902	9.36676	8.50065	1.76947e-05	0.00521133	3.5021	SLC31A1	chr9	115983808 - 116029217	45409
TC01002583.hg.1	0.669525	9.63544	4.59491	0.00145097	0.023673	-0.87383	ELOVL1	chr1	43829068 - 43833745	4677
TC10001419.hg.1	0.670073	10.1361	4.88412	0.000978966	0.0199723	-0.474025	NDST2	chr10	75561669 - 75571589	9920
TC11002456.hg.1	0.671423	9.2399	3.81179	0.00447573	0.041027	-2.01855	SNX19	chr11	130745331 - 130786404	41073
TC09001459.hg.1	0.673059	8.85906	4.18947	0.0025713	0.0311	-1.45562	TMEM245	chr9	111777415 - 111882225	104810
TC09001008.hg.1	0.678931	9.74328	4.80321	0.00109155	0.0210715	-0.584574	B4GALT1	chr9	33104079 - 33167356	63277
TC12001443.hg.1	0.67939	10.9175	5.22379	0.0006263	0.0163959	-0.0210493	SENP1	chr12	48436681 - 48500091	63410
TC19000541.hg.1	0.679492	10.0098	3.9318	0.00374486	0.0373787	-1.83763	SAMD4B	chr19	39833108 - 39875537	42429
TC06001584.hg.1	0.67974	10.4929	5.87637	0.000277826	0.0119299	0.799224	TAPBP	chr6	33267471 - 33282164	14693
TC11002038.hg.1	0.68221	10.1792	9.17327	9.73411e-06	0.00465858	4.06528	DHCR7	chr11	71145457 - 71159481	14024
TC10000757.hg.1	0.686239	8.76068	5.68373	0.000351042	0.012841	0.563841	TMEM180	chr10	104221149 - 104239484	18335
TC17000034.hg.1	0.68738	10.2859	4.51598	0.00161888	0.0247267	-0.985165	CTNS	chr17	3539762 - 3566397	26635
TC13000330.hg.1	0.687391	8.63999	4.10446	0.00290783	0.032887	-1.58064	GPR180	chr13	95254104 - 95286899	32795
TC06001959.hg.1	0.688021	8.60433	6.74252	0.000102896	0.00840586	1.79066	MMS22L	chr6	97590037 - 97731093	141056
TC17000057.hg.1	0.691923	10.5322	4.18199	0.00259914	0.0311	-1.46657	RNF167	chr17	4843423 - 4848518	5095
TC17000633.hg.1	0.693253	9.57056	7.78717	3.48292e-05	0.0060884	2.85213	ATP5G1	chr17	46970127 - 46973233	3106
TC12003205.hg.1	0.693319	8.91519	7.68844	3.83963e-05	0.00621155	2.75761	NDUFA9	chr12	4758264 - 4798454	40190
TC20000208.hg.1	0.693714	9.6961	6.85929	9.06241e-05	0.0081321	1.9163	POFUT1	chr20	30795683 - 30826470	30787
TC06000817.hg.1	0.695245	8.06483	4.63921	0.001365	0.0232273	-0.811747	MANEA	chr6	96025373 - 96057333	31960
TC22000316.hg.1	0.695682	9.09372	5.34566	0.000535698	0.0154527	0.137105	SMCR7L	chr22	39895437 - 39914137	18700
TC06001961.hg.1	0.696008	8.44352	4.04965	0.0031495	0.0344277	-1.66177	FBXL4	chr6	99321334 - 99395849	74515
TC17000437.hg.1	0.698929	8.95038	6.73477	0.000103773	0.00840586	1.78225	PIGW	chr17	34890847 - 34895150	4303
TC06000697.hg.1	0.700377	9.87845	6.11764	0.0002087	0.0105137	1.08623	PTP4A1	chr6	64231651 - 64293492	61841
TC17000864.hg.1	0.702148	9.43615	6.51377	0.00013257	0.00911248	1.53915	GALR2	chr17	74070875 - 74073622	2747
TC0X000190.hg.1	0.703447	8.11813	5.23014	0.000621192	0.0163819	-0.0127575	ATP6AP2	chrX	40440146 - 40465889	25743
TC16000870.hg.1	0.703708	9.65441	7.16589	6.54045e-05	0.00729377	2.23757	LITAF	chr16	11641578 - 11681322	39744
TC02001993.hg.1	0.704001	9.48694	5.14922	0.000689857	0.0172259	-0.118967	MOB1A	chr2	74379725 - 74406025	26300
TC01006289.hg.1	0.704151	10.0258	4.82551	0.0010592	0.0207256	-0.554015	SFT2D2	chr1	168195176 - 168212378	17202
TC06000658.hg.1	0.706476	8.15278	4.38895	0.00193459	0.0269714	-1.16633	TMEM14A	chr6	52535884 - 52551386	15502
TC15000304.hg.1	0.706823	10.9291	5.07695	0.00075816	0.0176451	-0.214668	CHP1	chr15	41523037 - 41574088	51051
TC01002676.hg.1	0.707592	10.0279	5.08364	0.000751546	0.0176169	-0.205784	TMEM48	chr1	54231133 - 54304533	73400
TC09000853.hg.1	0.709278	9.08382	5.63015	0.000374973	0.013293	0.49737	FLJ40292	chr9	140657474 - 140659224	1750
TC18000132.hg.1	0.709475	8.99747	5.10615	0.000729723	0.0175371	-0.17591	RNF125	chr18	29598335 - 29653176	54841
TC07001580.hg.1	0.709805	8.1012	6.73269	0.000104009	0.00840586	1.78	SLC25A40	chr7	87462883 - 87505692	42809
TC10002945.hg.1	0.710081	8.06409	3.97185	0.0035301	0.0363974	-1.77766	ENTPD7	chr10	101419263 - 101471002	51739
TC18000268.hg.1	0.712869	10.0089	9.23863	9.2028e-06	0.00465858	4.11762	ADNP2	chr18	77866915 - 77898234	31319
TC12002122.hg.1	0.713648	9.06919	5.6807	0.000352351	0.0128428	0.560091	SLC15A4	chr12	129277739 - 129308541	30802
TC11001090.hg.1	0.713946	10.0736	4.3603	0.00201454	0.0273607	-1.20751	RNF26	chr11	119205210 - 119208024	2814
TC06000536.hg.1	0.714768	9.43184	6.82098	9.44635e-05	0.00821976	1.87528	C6orf89	chr6	36839646 - 36896740	57094
TC01001523.hg.1	0.716101	7.82595	5.11635	0.000720053	0.0174484	-0.162386	GPR52	chr1	174417212 - 174418683	1471
TC08000597.hg.1	0.719045	8.73639	7.9023	3.11232e-05	0.0060884	2.96091	LAPTM4B	chr8	98787285 - 98865241	77956
TC02000211.hg.1	0.719185	8.50371	5.26986	0.000590232	0.0162397	0.0390045	SLC30A6	chr2	32390910 - 32449448	58538
TC12000513.hg.1	0.72305	9.28767	7.37449	5.26967e-05	0.00720593	2.44923	SPRYD4	chr12	56862301 - 56864767	2466
TC20000762.hg.1	0.723407	11.1858	5.0469	0.000788695	0.0181936	-0.254711	PLAGL2	chr20	30780306 - 30795594	15288
TC15000328.hg.1	0.724777	11.1009	6.83759	9.27773e-05	0.00813466	1.89309	TUBGCP4	chr15	43663313 - 43698240	34927
TC06001015.hg.1	0.725888	9.31389	4.55736	0.00152838	0.0242471	-0.926671	PDE7B	chr6	136172834 - 136516712	343878
TC09000463.hg.1	0.728941	9.9438	4.63202	0.00137858	0.0233523	-0.821809	HIATL1	chr9	97136833 - 97223324	86491
TC01003014.hg.1	0.733983	10.648	5.97469	0.000247027	0.0114339	0.917221	NRAS	chr1	115247085 - 115259515	12430
TC20000333.hg.1	0.734818	8.19667	4.20982	0.00249705	0.0305444	-1.42584	TTPAL	chr20	43104526 - 43123244	18718
TC13000523.hg.1	0.734824	9.94113	5.38508	0.000509525	0.0150062	0.187763	SLC7A1	chr13	30083547 - 30169825	86278
TC03001690.hg.1	0.734926	9.96226	5.23889	0.000614224	0.0163819	-0.00133325	LRRC58	chr3	120043356 - 120068186	24830
TC0X001370.hg.1	0.735522	7.51846	4.96234	0.000881984	0.0189381	-0.368129	MBNL3	chrX	131503343 - 131623996	120653
TC15001630.hg.1	0.739711	9.34845	7.60287	4.18152e-05	0.00649039	2.67475	ADPGK	chr15	73043708 - 73076126	32418
TC09000539.hg.1	0.741695	7.45528	4.87743	0.000987787	0.0200181	-0.483134	TMEM38B	chr9	108456825 - 108538893	82068
TC11003449.hg.1	0.74761	11.4528	5.00895	0.000829167	0.0185534	-0.305471	TMX2	chr11	57479995 - 57508445	28450
TC17001112.hg.1	0.750473	8.85128	4.31541	0.00214708	0.0282814	-1.2723	SLC25A35	chr17	8191081 - 8198661	7580
TC12003225.hg.1	0.767468	9.77453	5.14729	0.000691591	0.0172259	-0.12151	ARF3	chr12	49297286 - 49351334	54048
TC18000282.hg.1	0.767553	8.33496	5.38905	0.000506969	0.0149693	0.192848	METTL4	chr18	2537524 - 2571508	33984
TC01001092.hg.1	0.771009	9.57396	8.02838	2.75559e-05	0.00575467	3.07827	LIX1L	chr1	145477085 - 145501669	24584
TC02002733.hg.1	0.772804	8.35469	9.23233	9.25263e-06	0.00465858	4.11259	LANCL1	chr2	211295973 - 211342376	46403
TC17001058.hg.1	0.775116	8.53911	5.57763	0.000400161	0.0137455	0.431799	DERL2	chr17	5374571 - 5389537	14966
TC20001741.hg.1	0.776456	9.99987	5.74689	0.00032495	0.012468	0.641626	FKBP1A	chr20	1349621 - 1373816	24195
TC01002618.hg.1	0.779528	8.88468	5.96879	0.000248767	0.0114339	0.910177	LRRC41	chr1	46726868 - 46769280	42412
TC03000677.hg.1	0.783263	11.465	7.48466	4.71018e-05	0.00703963	2.55882	RAB7A	chr3	128444965 - 128533641	88676
TC16001252.hg.1	0.799007	10.9162	9.02379	1.10813e-05	0.00495591	3.94403	AP1G1	chr16	71762903 - 71842979	80076
TC19000429.hg.1	0.801077	8.62357	6.25401	0.000178124	0.0098514	1.24469	NUDT19	chr19	33182867 - 33204702	21835
TC04001319.hg.1	0.801913	10.5829	7.74121	3.64423e-05	0.00612449	2.80827	CCNI	chr4	77968311 - 77997158	28847
TC09001488.hg.1	0.80637	10.4627	5.4293	0.000481805	0.0147702	0.244309	PTBP3	chr9	114758832 - 115112545	353713
TC12001637.hg.1	0.806426	9.94895	7.13585	6.74974e-05	0.00731392	2.20663	CTDSP2	chr12	58213710 - 58240747	27037
TC01002977.hg.1	0.807108	10.2495	8.16698	2.41461e-05	0.00545172	3.2052	KCNA3	chr1	111214310 - 111217655	3345
TC12003213.hg.1	0.812427	11.0168	6.23915	0.000181204	0.00985312	1.22756	CS	chr12	56665483 - 56694176	28693
TC0X000587.hg.1	0.812454	9.47829	4.64273	0.00135841	0.0231839	-0.806827	UBE2A	chrX	118708499 - 118718381	9882
TC02001916.hg.1	0.814966	10.3029	4.90292	0.000954649	0.0196156	-0.448488	SERTAD2	chr2	64858755 - 64977449	118694
TC12001670.hg.1	0.818388	8.56051	5.50187	0.0004398	0.0142626	0.336463	C12orf66	chr12	64580096 - 64616076	35980
TC11003499.hg.1	0.825407	10.4468	5.56308	0.000407466	0.0137958	0.413546	COX8A	chr11	63742079 - 63744015	1936
TC09000218.hg.1	0.827768	8.33184	3.73263	0.00503971	0.0438551	-2.13887	DCAF10	chr9	37800499 - 37867665	67166
TC03000164.hg.1	0.831164	9.63976	6.19431	0.00019086	0.0101024	1.17565	CCR4	chr3	32993066 - 32997841	4775
TC01000645.hg.1	0.832138	7.63316	7.89901	3.12231e-05	0.0060884	2.95782	ZYG11B	chr1	53192126 - 53293014	100888
TC07000413.hg.1	0.833083	10.3176	9.21141	9.42004e-06	0.00465858	4.09588	TMEM248	chr7	66386203 - 66423538	37335
TC02001643.hg.1	0.834459	9.67165	5.85451	0.000285229	0.0120447	0.772789	C2orf44	chr2	24252206 - 24272445	20239
TC14001152.hg.1	0.837154	7.34825	7.76736	3.55148e-05	0.0060884	2.83325	GCH1	chr14	55308724 - 55369570	60846
TC09001733.hg.1	0.837344	9.0457	3.97709	0.00350299	0.0363135	-1.76983	SEC16A	chr9	139340916 - 139345270	4354
TC10002958.hg.1	0.839221	8.67636	5.79316	0.000307176	0.0123509	0.69824	PI4K2A	chr10	99400443 - 99436191	35748
TC01000555.hg.1	0.840714	9.55038	11.1306	2.06552e-06	0.00199415	5.47104	ATP6V0B	chr1	44440320 - 44443972	3652
TC10001297.hg.1	0.848115	8.44697	8.31066	2.10951e-05	0.00536237	3.33453	CSTF2T	chr10	53455246 - 53459355	4109
TC13000472.hg.1	0.848979	8.76869	7.14611	6.67739e-05	0.00730442	2.21722	ZDHHC20	chr13	21946710 - 22033509	86799
TC08000332.hg.1	0.857356	9.85183	5.19686	0.00064849	0.0167567	-0.0563138	SGK196	chr8	42948657 - 42978577	29920
TC14000415.hg.1	0.858906	8.77638	4.85861	0.00101306	0.0203071	-0.508782	SLC39A9	chr14	69865096 - 69929107	64011
TC02005032.hg.1	0.861271	10.4665	4.81733	0.00107094	0.0208843	-0.565216	TEX261	chr2	71213068 - 71222075	9007
TC11001157.hg.1	0.863776	10.3305	6.96784	8.06449e-05	0.00778325	2.03146	EI24	chr11	125439112 - 125454575	15463
TC0X000339.hg.1	0.88024	10.6095	13.191	5.13724e-07	0.000983438	6.65013	UBQLN2	chrX	56590026 - 56594301	4275
TC11001005.hg.1	0.889953	9.7799	6.4282	0.000145984	0.0091627	1.4432	DLAT	chr11	111895538 - 111935114	39576
TC09001543.hg.1	0.894897	10.1516	7.34323	5.44145e-05	0.00720593	2.41787	RAB14	chr9	123940415 - 123985292	44877
TC01001385.hg.1	0.896903	9.68386	6.24206	0.000180597	0.00985312	1.23091	SDHC	chr1	161284047 - 161334535	50488
TC02000150.hg.1	0.903332	8.7569	5.35636	0.000528457	0.0152893	0.150869	EPT1	chr2	26531415 - 26618759	87344
TC17000315.hg.1	0.908335	9.11793	4.73113	0.00120366	0.0217699	-0.683908	NLK	chr17	26369182 - 26523407	154225
TC01003708.hg.1	0.910795	9.20679	5.71437	0.000338113	0.012609	0.601644	RABIF	chr1	202847410 - 202858385	10975
TC01004069.hg.1	0.91085	8.61894	4.30987	0.00216406	0.0283103	-1.28031	RN5S82	chr1	247367872 - 247367963	91
TC12002055.hg.1	0.91887	9.68911	5.77664	0.0003134	0.0124488	0.678055	SPPL3	chr12	121200313 - 121342174	141861
TC02002348.hg.1	0.932732	9.9692	16.5025	7.95511e-08	0.000913724	8.07911	FAM168B	chr2	131805449 - 131851033	45584
TC01001421.hg.1	0.941516	9.55918	5.22932	0.000621846	0.0163819	-0.0138221	UHMK1	chr1	162466964 - 162499419	32455
TC12001547.hg.1	0.951087	10.5391	8.62181	1.58446e-05	0.00496971	3.60695	AAAS	chr12	53701240 - 53718542	17302
TC18000069.hg.1	0.953386	10.1282	4.12602	0.00281824	0.0323704	-1.54884	SEH1L	chr18	12947983 - 12987536	39553
TC06001800.hg.1	0.953782	8.34151	8.40383	1.93451e-05	0.00531491	3.4172	TRAM2	chr6	52362200 - 52441862	79662
TC0X001325.hg.1	0.961382	8.10627	6.54183	0.00012847	0.00899757	1.57039	LAMP2	chrX	119560003 - 119603220	43217
TC11000521.hg.1	0.966957	10.3529	5.74975	0.000323821	0.012468	0.645131	TMEM109	chr11	60681346 - 60690915	9569
TC10001552.hg.1	0.974389	9.39594	5.88379	0.000275361	0.0119299	0.808177	TCTN3	chr10	97423153 - 97454712	31559
TC12000305.hg.1	0.977936	7.2999	7.06984	7.23591e-05	0.00748754	2.13824	ALG10B, ALG10	chr12	38710380 - 38723528	13148
TC15001048.hg.1	0.982092	9.39359	3.6015	0.00614578	0.0481413	-2.33979	NIPA2	chr15	23004684 - 23034427	29743
TC07001843.hg.1	0.984419	8.56976	6.13124	0.000205406	0.0104394	1.10216	MGC27345	chr7	127944240 - 127945068	828
TC03001039.hg.1	0.989609	7.42862	3.89582	0.00394962	0.0385412	-1.89167	FLJ42393	chr3	187896331 - 187898598	2267
TC0X000098.hg.1	0.993263	8.33537	5.29357	0.000572551	0.0160008	0.0697881	MBTPS2	chrX	21857656 - 21903542	45886
TC02000173.hg.1	0.994264	10.0118	14.2359	2.73192e-07	0.000983438	7.15484	SNX17	chr2	27593363 - 27599996	6633
TC0X001412.hg.1	0.998123	9.59579	3.87278	0.004087	0.039071	-1.92637	MMGT1	chrX	135044229 - 135056222	11993
TC02000696.hg.1	1.00248	8.5741	3.70483	0.00525525	0.0446794	-2.18131	BCL2L11	chr2	111907526 - 111911928	4402
TC03000573.hg.1	1.00402	8.01602	3.99668	0.00340358	0.0356542	-1.74059	SLC35A5	chr3	112280556 - 112304424	23868
TC01002796.hg.1	1.02733	8.70507	6.15417	0.000199983	0.0104124	1.12894	PIGK	chr1	77554667 - 77685132	130465
TC0X002343.hg.1	1.0616	9.80827	7.82115	3.36874e-05	0.0060884	2.88439	IDS	chrX	148558521 - 148586884	28363
TC02001202.hg.1	1.06423	10.1761	12.3116	9.06676e-07	0.00148773	6.17932	ICOS	chr2	204801471 - 204826300	24829
TC04000257.hg.1	1.07259	8.89008	4.75611	0.00116347	0.021619	-0.649397	TMEM33	chr4	41937137 - 41962824	25687
TC11001873.hg.1	1.07471	10.2701	9.4325	7.80656e-06	0.00465858	4.27049	GANAB	chr11	62392298 - 62414104	21806
TC12002016.hg.1	1.07679	10.2519	11.1947	1.97133e-06	0.00199415	5.51196	WSB2	chr12	118470492 - 118499979	29487
TC17001082.hg.1	1.0949	10.2667	4.59968	0.00144144	0.023551	-0.867132	CTDNEP1	chr17	7146906 - 7155280	8374
TC08001011.hg.1	1.10251	9.59949	7.08262	7.13881e-05	0.00745422	2.15153	CNOT7	chr8	17086737 - 17104387	17650
TC07001880.hg.1	1.113	9.27524	6.2937	0.000170172	0.00975074	1.2903	SLC35B4	chr7	133974084 - 134001827	27743
TC02005028.hg.1	1.11311	9.11556	4.92469	0.000927305	0.0194505	-0.418987	PPP3R1	chr2	68405989 - 68483369	77380
TC17000768.hg.1	1.11593	11.2166	9.63617	6.58723e-06	0.00465858	4.42734	DCAF7	chr17	61627822 - 61671642	43820
TC18000567.hg.1	1.12938	9.99242	6.84776	9.17611e-05	0.00813466	1.90398	RTTN	chr18	67671043 - 67872962	201919
TC03000165.hg.1	1.15159	10.3778	6.83903	9.26325e-05	0.00813466	1.89463	CRTAP	chr3	33155450 - 33189265	33815
TC08001575.hg.1	1.15275	9.4902	11.4886	1.59662e-06	0.00199415	5.69568	DERL1	chr8	124025458 - 124054663	29205
TC17001020.hg.1	1.16202	10.55	6.79311	9.73687e-05	0.00828427	1.84532	UBE2G1	chr17	4172512 - 4269969	97457
TC13000552.hg.1	1.17912	8.7658	4.61435	0.00141254	0.0234317	-0.846542	CG030	chr13	33078643 - 33083532	4889
TC0X000427.hg.1	1.17996	8.23441	5.86851	0.000280461	0.0119754	0.789735	P2RY10	chrX	78200829 - 78217451	16622
TC12000301.hg.1	1.19349	8.12795	5.80486	0.000302852	0.0122917	0.712502	ALG10	chr12	34175216 - 34182629	7413
TC14001324.hg.1	1.21069	11.2297	10.9852	2.29805e-06	0.00203042	5.37717	C14orf1	chr14	76116134 - 76127538	11404
TC09001028.hg.1	1.26013	9.52213	5.96712	0.000249261	0.0114339	0.908184	DCAF12	chr9	34086381 - 34127397	41016
TC07001891.hg.1	1.26553	10.664	11.1591	2.02295e-06	0.00199415	5.48931	LUZP6, MTPN	chr7	135611503 - 135662204	50701
TC16001218.hg.1	1.3053	10.7998	7.81147	3.40084e-05	0.0060884	2.87521	CHTF8	chr16	69151912 - 69166493	14581
TC08000829.hg.1	1.31438	7.85888	5.14895	0.000690093	0.0172259	-0.119313	ZNF623	chr8	144731830 - 144738588	6758
TC03001495.hg.1	1.36618	10.1943	6.3546	0.000158717	0.00949491	1.35985	ARF4	chr3	57557090 - 57583947	26857
TC11002133.hg.1	1.38296	10.1594	8.75541	1.40483e-05	0.00496971	3.7208	ALG8	chr11	77811988 - 77850706	38718
TC06001328.hg.1	1.40122	10.0647	13.4973	4.24948e-07	0.000983438	6.80388	C6orf62	chr6	24705089 - 24721064	15975
TC05000189.hg.1	1.54606	9.53878	5.05494	0.000780398	0.0181084	-0.243985	C5orf51	chr5	41904290 - 41921738	17448
TC07000893.hg.1	1.56871	6.94863	7.0109	7.70263e-05	0.00776073	2.0767	TAS2R3	chr7	141463897 - 141464997	1100

## Sheet: U2AF2RIP_U2AF1vCtrl_ASGene
AffyGene	max_dI	midas-p (corresponding)	symbol	external gene ID	description	regulation_call	event_call	number_of_comparisons	num_effected_exons	up_exons	down_exons	functional_attribute	uniprot-ens_exon_features	direct_domain_alignments	pathways	mean_fold_change	exon-annotations	exon-region IDs	alternative gene ID	splice-annotation score
ENSG00000168385	0.258466		2014-09-02	ENSG00000168385	septin 2 [Source:HGNC Symbol;Acc:7729]	upregulated	ei-ex	4	4	E5.1,E6.1	E4.2,E6.1|E4.2	(+)AA:361(ENSP00000375834)->361(ENSP00000353157),(-)AA:361(ENSP00000375834)->361(ENSP00000353157),(-)AA:361(ENSP00000385172)->361(ENSP00000353157)			regulation of L-glutamate transport // cell cycle // mitosis // smoothened signaling pathway // small GTPase mediated signal transduction // neuron projection development // regulation of protein localization // cilium assembly // regulation of catalytic activity // cell division // protein binding // GTP binding // enzyme regulator activity // protein complex scaffold // exocyst // condensed chr…	-0.20485	cassette-exon|cassetteExon, cassetteExon|mutually-exclusive-exon	E4-2|E5-1|E6-1	TC02001477.hg	5
ENSG00000114770	0.245834		ABCC5	ENSG00000114770	ATP-binding cassette, sub-family C (CFTR/MRP), member 5 [Source:HGNC Symbol;Acc:56]	downregulated	ei-ex	1	1		E11.1_183700811	(+)truncated,(-)AA:208(ENSP00000371934)->1437(ENSP00000333926)	(-)AAA+_ATPase-IPR003593,(-)ABC_transporter-like-IPR003439,(-)ABC_transporter_type1-IPR017940,(-)ABC_transptrTM_dom_typ1-IPR011527,(-)ABC_transptr_TM_dom-IPR001140,(-)DOMAIN-ABC transmembrane type-1 1,(-)DOMAIN-ABC transmembrane type-1 2,(-)DOMAIN-ABC transporter 1,(-)DOMAIN-ABC transporter 2,(-)MOD_RES-Phosphoserine,(-)MOD_RES-Phosphothreonine,(-)NP_BIND-ATP 1,(-)NP_BIND-ATP 2,(-)P-loop_NTPase-I…	(direct)TRANSMEM-Helical-UniProt, (direct)ABC_transporter_type1-IPR017940, (direct)ABC_transptrTM_dom_typ1-IPR011527, (direct)DOMAIN-ABC transmembrane type-1 1-UniProt, (direct)ABC_transptr_TM_dom-IPR001140	Fluoropyrimidine Activity:WP1601 // carbohydrate metabolic process // transport // organic anion transport // glycosaminoglycan metabolic process // hyaluronan metabolic process // hyaluronan biosynthetic process // small molecule metabolic process // transmembrane transport // nucleotide binding // ATP binding // organic anion transmembrane transporter activity // ATPase activity // nucleoside-t…	-0.0227633	alt-C-term	E11-1	TC03002064.hg	3
ENSG00000136754	0.400856		ABI1	ENSG00000136754	abl-interactor 1 [Source:HGNC Symbol;Acc:11320]	downregulated	ei-ex	3	3		E13.1_27040728,E13.1_27040728|E9.1,E9.1	(+)AA:394(ENSP00000439646)->423(ENSP00000365307),(+)AA:394(ENSP00000439646)->446(ENSP00000365336),(+)AA:394(ENSP00000439646)->482(ENSP00000365304),(+)alt-coding	(+)Abl-interactor_HHR_dom-IPR012849,(+)MOD_RES-Phosphoserine,(+)SH3_domain-IPR001452,(+)p67phox-IPR000108,(-)Abl-interactor_HHR_dom-IPR012849,(-)SH3_domain-IPR001452	(direct)COMPBIAS-Pro-rich-UniProt, (direct)SH3_domain-IPR001452, (direct)p67phox-IPR000108	EGF/EGFR Signaling Pathway:WP437 // somitogenesis // cellular component movement // transmembrane receptor protein tyrosine kinase signaling pathway // actin polymerization or depolymerization // negative regulation of cell proliferation // cellular process // peptidyl-tyrosine phosphorylation // megakaryocyte development // innate immune response // positive regulation of protein tyrosine kinase…	-0.501626		E13-1|E9-1	TC10001120.hg	2
ENSG00000138443	0.273019		ABI2	ENSG00000138443	abl-interactor 2 [Source:HGNC Symbol;Acc:24011]	upregulated	ei-ex	1	1	E10.1|E9.2		(+)truncated,(-)AA:45(BAH14371.1)->155(ENST00000376135-PEP)	(-)DOMAIN-t-SNARE coiled-coil homology,(-)HELIX,(-)STRAND,(-)TURN,(-)T_SNARE_dom-IPR000727	(direct)Abl-interactor_HHR_dom-IPR012849	Regulation of Actin Cytoskeleton:WP51 // cellular component movement // cytoskeleton organization // learning or memory // actin polymerization or depolymerization // dendrite development // cell migration // peptidyl-tyrosine phosphorylation // camera-type eye development // DNA binding // protein binding // cytoskeletal adaptor activity // SH3 domain binding // kinase binding // ubiquitin prote…	0.0494378	cassette-exon|cassetteExon	E9-2	TC02001198.hg	5
ENSG00000231312	0.225447		AC007246.3	ENSG00000231312		upregulated	ei-ex	1	1	E3.2|E4.1						0.11249	alt-N-term|cassette-exon	E4-1	TC02000250.hg	3
ENSG00000227403	0.231651		AC009299.3	ENSG00000227403		upregulated	ei-ex	2	1	E2.1						0.370396	cassette-exon	E2-1	TC02000969.hg	3
ENSG00000233806	0.226997		AC131097.3	ENSG00000233806		upregulated	ei-ex	1	1	E4.2		(-)AA:27(ENST00000429947-PEP)->62(ENST00000457686-PEP),(-)alt-C-terminus,(-)alt-N-terminus				-0.54136	cassette-exon	E4-2	TC02001490.hg	3
ENSG00000123130	0.281439		ACOT9	ENSG00000123130	acyl-CoA thioesterase 9 [Source:HGNC Symbol;Acc:17152]	upregulated	ei-ex	2	2	E5.1,E7.1_2375135		(-)AA:439(ENSP00000336580)->448(ENSP00000368605),(-)alt-coding		(direct)TRANSIT-Mitochondrion-UniProt	acyl-CoA metabolic process // acetyl-CoA hydrolase activity // carboxylesterase activity // mitochondrion	-0.221505	alt-3', alt-5'|cassette-exon|cassette-exon|cassetteExon	E5-1|E5-2|E7-1	TC0X000921.hg	5
ENSG00000121989	0.284528		ACVR2A	ENSG00000121989	activin A receptor, type IIA [Source:HGNC Symbol;Acc:173]	downregulated	ei-ex	2	1		E3.1	(+)AA:68(ENST00000462659-PEP)->513(ENSP00000241416),(+)alt-C-terminus,(+)alt-N-terminus	(+)ACT_SITE-Proton acceptor,(+)Activin_II/TGFBeta-II_recpt-IPR000333,(+)Activin_rcpt-IPR000472,(+)BINDING-ATP,(+)DISULFID,(+)DOMAIN-Protein kinase,(+)HELIX,(+)Kinase-like_dom-IPR011009,(+)NP_BIND-ATP,(+)Prot_kinase_cat_dom-IPR000719,(+)SIGNAL,(+)STRAND,(+)Ser-Thr/Tyr_kinase_cat_dom-IPR001245,(+)Ser/Thr_dual-sp_kinase_dom-IPR002290,(+)TOPO_DOM-Cytoplasmic,(+)TOPO_DOM-Extracellular,(+)Tyr_kinase_ca…	(indirect)TOPO_DOM-Extracellular-UniProt, (indirect)DISULFID--UniProt	gastrulation with mouth forming second // positive regulation of protein phosphorylation // protein phosphorylation // transmembrane receptor protein serine/threonine kinase signaling pathway // spermatogenesis // determination of left/right symmetry // mesoderm development // male gonad development // anterior/posterior pattern formation // regulation of signal transduction // positive regulatio…	0.10325	cassette-exon	E3-1	TC02000923.hg	3
ENSG00000035687	0.26459		ADSS	ENSG00000035687	adenylosuccinate synthase [Source:HGNC Symbol;Acc:292]	downregulated	ei-ex	1	1		E8.2_244587705	(+)truncated,(-)AA:92(AK308749-PEP)->456(ENSP00000355493)	(-)ACT_SITE-Proton donor,(-)Adenylosuccinate_synthetase-IPR001114,(-)BINDING-GTP,(-)BINDING-IMP,(-)BINDING-IMP; shared with dimeric partner,(-)HELIX,(-)METAL-Magnesium; via carbonyl oxygen,(-)NP_BIND-GTP,(-)P-loop_NTPase-IPR027417,(-)REGION-IMP binding,(-)REGION-Substrate binding,(-)STRAND,(-)TURN	(direct)STRAND-UniProt, (direct)P-loop_NTPase-IPR027417, (direct)Adenylosuccinate_synthetase-IPR001114	Nucleotide Metabolism:WP404 // immune system process // purine base metabolic process // purine nucleotide biosynthetic process // AMP biosynthetic process // GTP catabolic process // aspartate metabolic process // purine ribonucleoside monophosphate biosynthetic process // response to purine-containing compound // 'de novo' AMP biosynthetic process // small molecule metabolic process // IMP meta…	-0.326597		E8-1|E8-2	TC01004046.hg	2
ENSG00000223959	0.201585		AFG3L1P	ENSG00000223959	AFG3 ATPase family member 3-like 1 (S. cerevisiae), pseudogene [Source:HGNC Symbol;Acc:314]	downregulated	ei-ex	1	1		E3.1|E2.4					-0.07579	mutually-exclusive-exon	E2-4	TC16000710.hg	3
ENSG00000183077	0.251705		AFMID	ENSG00000183077	arylformamidase [Source:HGNC Symbol;Acc:20910]	downregulated	ei-ex	2	2		E4.2,E9.1	(+)AA:57(ENSP00000466859)->93(ENSP00000464929),(+)alt-C-terminus,(-)AA:56(ENST00000589664-PEP)->308(ENSP00000328938),(-)alt-C-terminus,(-)alt-N-terminus,(-)microRNA-target(hsa-miR-128:miRanda,hsa-miR-145:miRanda,hsa-miR-18a:miRanda,hsa-miR-18b:miRanda,hsa-miR-191:miRanda,hsa-miR-27a:miRanda,hsa-miR-27b:miRanda,hsa-miR-342-3p:miRanda,hsa-miR-370:miRanda,hsa-miR-371-5p:miRanda,hsa-miR-455-5p:miRand…	(+)MOTIF-HGGXW,(-)AB_hydrolase_3-IPR013094,(-)ACT_SITE,(-)ACT_SITE-Nucleophile,(-)MOTIF-HGGXW	(direct)AB_hydrolase_3-IPR013094	Tryptophan metabolism:WP465 // NAD Biosynthesis II (from tryptophan):WP2485 // tryptophan catabolic process // metabolic process // tryptophan catabolic process to kynurenine // de novo NAD biosynthetic process from tryptophan // cellular nitrogen compound metabolic process // small molecule metabolic process // arylformamidase activity // hydrolase activity // nucleus // cytoplasm // cytosol	-0.296739	alt-C-term, cassette-exon|cassetteExon	E4-2|E9-1	TC17000898.hg	5
ENSG00000119844	0.233999		AFTPH	ENSG00000119844	aftiphilin [Source:HGNC Symbol;Acc:25951]	upregulated	ei-ex	2	2	E7.1|E8.1,E8.1		(+)AA:75(ENST00000487769-PEP)->568(ENSP00000386913),(+)alt-C-terminus,(+)alt-N-terminus,(-)AA:75(ENST00000487769-PEP)->909(ENSP00000238856),(-)alt-C-terminus,(-)alt-N-terminus	(+)MOD_RES-Phosphothreonine,(+)MOTIF-WXXF motif 2,(+)MOTIF-WXXF motif 3 (partial),(+)MOTIF-WXXF motif 4,(+)REGION-Clathrin-binding,(-)MOD_RES-Phosphoserine,(-)MOD_RES-Phosphothreonine,(-)MOTIF-WXXF motif 1,(-)MOTIF-WXXF motif 2,(-)MOTIF-WXXF motif 3 (partial),(-)MOTIF-WXXF motif 4		protein transport // clathrin binding // nucleus // cytoplasm // Golgi apparatus // cytosol // AP-1 adaptor complex // intracellular membrane-bounded organelle	0.0473148	cassetteExon|mutually-exclusive-exon	E8-1	TC02000368.hg	5
ENSG00000175309	0.30145		AGXT2L2	ENSG00000175309	alanine-glyoxylate aminotransferase 2-like 2 [Source:HGNC Symbol;Acc:28249]	downregulated	ei-ex	3	3	E5.1_177655606	E3.6,E6.2_177652446	(+)AA:55(ENSP00000425425)->123(ENSP00000421810),(+)nonsense_mediated_decay,(-)AA:123(ENSP00000421810)->219(ENSP00000321290),(-)alt-C-terminus,(-)truncated	(+)Aminotrans_3-IPR005814,(+)PyrdxlP-dep_Trfase-IPR015424,(-)Aminotrans_3-IPR005814,(-)PyrdxlP-dep_Trfase-IPR015424	(direct)Aminotrans_3-IPR005814, (direct)PyrdxlP-dep_Trfase-IPR015424	transaminase activity // lyase activity // pyridoxal phosphate binding // mitochondrion	0.253953	alt-3'|cassette-exon, bleedingExon|cassette-exon|cassetteExon, cassette-exon|cassetteExon	E3-6|E5-1|E6-1|E6-2	TC05002122.hg	5
ENSG00000173209	0.218351		AHSA2	ENSG00000173209	AHA1, activator of heat shock 90kDa protein ATPase homolog 2 (yeast) [Source:HGNC Symbol;Acc:20437]	downregulated	ei-ex	1	1		E7.1	(-)AA:107(BC050395-PEP)->146(ENSP00000386721),(-)alt-C-terminus,(-)alt-N-terminus			response to stress // ATPase activator activity // chaperone binding	-0.40898	exon-region-exclusion|exon-region-exclusion	E7-1	TC02000353.hg	3
ENSG00000170776	0.2938		AKAP13	ENSG00000170776	A kinase (PRKA) anchor protein 13 [Source:HGNC Symbol;Acc:371]	downregulated	ei-ex	3	2	E20.2	E20.2|E19.1	(+)AA:2813(ENSP00000378026)->2817(ENSP00000354718),(+)alt-coding,(-)AA:2813(ENSP00000378026)->2817(ENSP00000354718),(-)alt-coding			G Protein Signaling Pathways:WP35 // apoptosis // small GTPase mediated signal transduction // regulation of Rho protein signal transduction // intracellular signal transduction // nerve growth factor receptor signaling pathway // regulation of small GTPase mediated signal transduction // cAMP-dependent protein kinase activity // signal transducer activity // Rho guanyl-nucleotide exchange factor…	-0.397999	cassetteExon|mutually-exclusive-exon	E19-1|E20-2	TC15000827.hg	5
ENSG00000159063	0.408597		ALG8	ENSG00000159063	ALG8, alpha-1,3-glucosyltransferase [Source:HGNC Symbol;Acc:23161]	upregulated	ei-ex	3	3	E17.1,E20.1_77812257	E17.1	(-)AA:413(BC017892-PEP)->467(ENSP00000365326),(-)alt-C-terminus,(-)alt-N-terminus	(+)Glyco_trans_ALG6/ALG8-IPR004856,(+)TRANSMEM-Helical;,(-)Glyco_trans_ALG6/ALG8-IPR004856,(-)TRANSMEM-Helical;	(direct)TRANSMEM-Helical-UniProt, (direct)Glyco_trans_ALG6/ALG8-IPR004856	protein N-linked glycosylation // dolichol-linked oligosaccharide biosynthetic process // protein N-linked glycosylation via asparagine // post-translational protein modification // cellular protein metabolic process // alpha-1,3-mannosyltransferase activity // transferase activity, transferring hexosyl groups // endoplasmic reticulum membrane // integral to membrane	1.25967	cassette-exon	E17-1|E20-1	TC11002133.hg	3
ENSG00000151150	0.319516		ANK3	ENSG00000151150	ankyrin 3, node of Ranvier (ankyrin G) [Source:HGNC Symbol;Acc:494]	upregulated	ei-ex	5	4	E27.2,E29.1_61905795,E34.1_61898861	E29.1_61905795	(-)AA:1861(ENSP00000362933)->1868(ENSP00000425236),(-)AA:86(ENSP00000426690)->114(ENSP00000422657),(-)alt-N-terminus			cytokinesis after mitosis // plasma membrane organization // signal transduction // axonogenesis // axon guidance // positive regulation of gene expression // positive regulation of sodium ion transport // regulation of action potential in neuron // Golgi to plasma membrane protein transport // regulation of potassium ion transport // establishment of protein localization // positive regulation o…	-0.32934	alt-N-term, alt-N-term|mutually-exclusive-exon|cassetteExon	E27-2|E29-1|E34-1	TC10001319.hg	5
ENSG00000182287	0.243621		AP1S2	ENSG00000182287	adaptor-related protein complex 1, sigma 2 subunit [Source:HGNC Symbol;Acc:560]	upregulated	ei-ex	2	2	E4.1	E8.1_15846339	(+)AA:68(ENST00000479184-PEP)->146(ENSP00000389474),(+)alt-C-terminus,(+)alt-N-terminus,(-)AA:68(ENST00000479184-PEP)->146(ENSP00000389474),(-)alt-C-terminus,(-)alt-N-terminus	(+)AP_complex_ssu-IPR016635,(+)AP_mu_sigma_su-IPR022775,(+)Longin-like_dom-IPR011012,(-)AP_complex_ssu-IPR016635,(-)AP_mu_sigma_su-IPR022775,(-)Longin-like_dom-IPR011012	(direct)AP_complex_ssu-IPR016635, (direct)Longin-like_dom-IPR011012	transport // intracellular protein transport // post-Golgi vesicle-mediated transport // endocytosis // protein transport // viral reproduction // cellular membrane organization // vesicle-mediated transport // antigen processing and presentation of exogenous peptide antigen via MHC class II // regulation of defense response to virus by virus // protein transporter activity // Golgi membrane // l…	0.522638	alt-C-term|mutually-exclusive-exon|cassetteExon	E4-1|E8-1	TC0X000882.hg	5
ENSG00000221838	0.214545		AP4M1	ENSG00000221838	adaptor-related protein complex 4, mu 1 subunit [Source:HGNC Symbol;Acc:574]	downregulated	ei-ex	1	1		E8.1|E9.1	(+)truncated,(-)AA:218(ENSP00000396928)->453(ENSP00000352603),(-)nonsense_mediated_decay	(-)Clathrin_mu-IPR001392,(-)Clathrin_mu_C-IPR008968,(-)DOMAIN-MHD,(-)HELIX,(-)STRAND,(-)TURN	(direct)Clathrin_mu_C-IPR008968, (direct)STRAND-UniProt, (direct)Clathrin_mu-IPR001392, (direct)DOMAIN-MHD-UniProt, (direct)TURN-UniProt	transport // intracellular protein transport // Golgi to endosome transport // vesicle-mediated transport // transporter activity // protein binding // Golgi trans cisterna // trans-Golgi network // coated pit // AP-type membrane coat adaptor complex // clathrin adaptor complex	0.354995	cassette-exon|cassetteExon	E8-1	TC07000611.hg	5
ENSG00000170632	0.430368		ARMC10	ENSG00000170632	armadillo repeat containing 10 [Source:HGNC Symbol;Acc:21706]	downregulated	ei-ex	5	3		E7.1,E8.1,E9.2|E8.1	(+)AA:193(ENSP00000319798)->284(ENSP00000396654),(+)AA:249(ENSP00000405612)->308(ENSP00000413619),(+)alt-C-terminus,(+)alt-coding,(+)nonsense_mediated_decay,(-)AA:249(ENSP00000405612)->284(ENSP00000397969),(-)AA:249(ENSP00000405612)->308(ENSP00000413619),(-)alt-coding,(-)microRNA-target(hsa-miR-136:miRanda)	(+)ARM-rpt_dom-IPR006911,(+)ARM-type_fold-IPR016024,(+)REPEAT-ARM,(-)ARM-rpt_dom-IPR006911,(-)ARM-type_fold-IPR016024,(-)REPEAT-ARM	(direct)ARM-rpt_dom-IPR006911, (direct)REPEAT-ARM-UniProt, (indirect)REPEAT-ARM-UniProt, (direct)ARM-type_fold-IPR016024	ATP hydrolysis coupled proton transport // regulation of growth // binding // hydrolase activity, acting on acid anhydrides, catalyzing transmembrane movement of substances // vacuolar proton-transporting V-type ATPase, V1 domain // mitochondrion // endoplasmic reticulum membrane // integral to membrane	0.700299	cassetteExon|mutually-exclusive-exon, mutually-exclusive-exon	E7-1|E8-1	TC07000671.hg	5
ENSG00000125962	0.238166		ARMCX5	ENSG00000125962	armadillo repeat containing, X-linked 5 [Source:HGNC Symbol;Acc:25772]	downregulated	ei-ex	1	1		E3.1	(-)AA:558(ENSP00000446385)->558(BAG53350.1)			binding	-0.327322	exon-region-exclusion|exon-region-exclusion	E3-1	TC0X002319.hg	3
ENSG00000115966	0.226773		ATF2	ENSG00000115966	activating transcription factor 2 [Source:HGNC Symbol;Acc:784]	downregulated	ei-ex	1	1		E19.1_175945509|E7.2	(-)AA:43(ENSP00000414171)->126(ENSP00000376326),(-)alt-C-terminus,(-)alt-N-terminus,(-)nonsense_mediated_decay	(+)HELIX,(+)MOD_RES-Phosphoserine,(+)MOD_RES-Phosphothreonine,(+)MOD_RES-Phosphothreonine; by MAPK1, MAPK3, MAPK11, MAPK12, MAPK14 and PLK3,(+)MOD_RES-Phosphothreonine; by MAPK11 and MAPK14,(+)STRAND,(+)TURN,(+)ZN_FING-C2H2-type,(+)Znf_C2H2-IPR007087	(direct)HELIX-UniProt, (direct)REGION-Leucine-zipper-UniProt, (direct)DOMAIN-bZIP-UniProt, (direct)bZIP-IPR004827, (direct)TF_cAMP-dep-IPR016378	IL-1 signaling pathway:WP195 // MAPK Signaling Pathway:WP382 // AGE/RAGE pathway:WP2324 // B Cell Receptor Signaling Pathway:WP23 // TCR Signaling Pathway:WP69 // Myometrial Relaxation and Contraction Pathways:WP289 // IL-4 Signaling Pathway:WP395 // p38 MAPK Signaling Pathway:WP400 // toll-like receptor signaling pathway // MyD88-dependent toll-like receptor signaling pathway // MyD88-independen…	0.186353	alt-C-term|cassette-exon	E19-1	TC02002545.hg	3
ENSG00000085978	0.244326		ATG16L1	ENSG00000085978	autophagy related 16-like 1 (S. cerevisiae) [Source:HGNC Symbol;Acc:21498]	upregulated	ei-ex	1	1	E12.1		(-)AA:607(ENSP00000375872)->624(ENSP00000375873),(-)alt-coding	(+)MOD_RES-Phosphoserine	(direct)WD40_repeat_dom-IPR017986	Senescence and Autophagy:WP615 // autophagic vacuole assembly // protein transport // protein homooligomerization // protein binding // autophagic vacuole membrane // autophagic vacuole // pre-autophagosomal structure membrane	0.120613	cassette-exon	E12-1	TC02001415.hg	3
ENSG00000145246	0.23524		ATP10D	ENSG00000145246	ATPase, class V, type 10D [Source:HGNC Symbol;Acc:13549]	downregulated	ei-ex	1	1		E9.1	(+)truncated,(-)AA:535(ENSP00000420909)->1426(ENSP00000273859)	(-)ATPase_P-typ_Plipid-transp-IPR006539,(-)ATPase_P-typ_cyto_domN-IPR023299,(-)ATPase_P-typ_transduc_dom_A-IPR008250,(-)Cation_transp_P_typ_ATPase-IPR001757,(-)HAD-like_dom-IPR023214,(-)METAL-Magnesium,(-)NP_BIND-ATP,(-)TOPO_DOM-Cytoplasmic,(-)TOPO_DOM-Extracellular,(-)TRANSMEM-Helical;	(direct)TRANSMEM-Helical-UniProt, (direct)Cation_transp_P_typ_ATPase-IPR001757, (direct)ATPase_P-typ_transduc_dom_A-IPR008250, (direct)ATPase_P-typ_Plipid-transp-IPR006539	cation transport // phospholipid transport // ion transmembrane transport // phospholipid translocation // transmembrane transport // nucleotide binding // magnesium ion binding // phospholipid-translocating ATPase activity // protein binding // ATP binding // cation-transporting ATPase activity // metal ion binding // endoplasmic reticulum // endoplasmic reticulum membrane // plasma membrane // …	0.226094	alt-3'|altThreePrime	E9-1	TC04000274.hg	5
ENSG00000166377	0.20051		ATP9B	ENSG00000166377	ATPase, class II, type 9B [Source:HGNC Symbol;Acc:13541]	downregulated	ei-ex	1	1		E8.1	(+)AA:136(ENSP00000442794)->193(ENSP00000468218),(+)alt-C-terminus,(+)alt-N-terminus,(-)microRNA-target(hsa-let-7b:miRanda,hsa-let-7g:miRanda,hsa-let-7i:miRanda,hsa-miR-1:miRanda,hsa-miR-140-5p:miRanda,hsa-miR-142-3p:miRanda,hsa-miR-145:miRanda,hsa-miR-196a:miRanda,hsa-miR-196b:miRanda,hsa-miR-204:miRanda,hsa-miR-206:RNAhybrid|miRanda,hsa-miR-211:miRanda,hsa-miR-29a:miRanda,hsa-miR-29b:miRanda,hs…	(+)TRANSMEM-Helical;		cation transport // phospholipid transport // aminophospholipid transport // phospholipid translocation // establishment of protein localization in Golgi // nucleotide binding // magnesium ion binding // phospholipid-translocating ATPase activity // ATP binding // aminophospholipid transporter activity // cation-transporting ATPase activity // metal ion binding // Golgi apparatus // trans-Golgi n…	-0.342392	cassette-exon	E8-1	TC18000262.hg	3
ENSG00000087152	0.226963		ATXN7L3	ENSG00000087152	ataxin 7-like 3 [Source:HGNC Symbol;Acc:25416]	downregulated	ei-ex	1	1		E10.5_42273463	(+)AA:347(ENSP00000374035)->354(ENSP00000397259),(+)alt-coding			transcription, DNA-dependent // histone deubiquitination // positive regulation of transcription, DNA-dependent // transcription coactivator activity // protein binding // ligand-dependent nuclear receptor transcription coactivator activity // metal ion binding // SAGA complex	0.0231492	alt-3'|cassette-exon|cassette-exon	E10-4|E10-5	TC17001575.hg	3
ENSG00000155096	0.205911		AZIN1	ENSG00000155096	antizyme inhibitor 1 [Source:HGNC Symbol;Acc:16432]	upregulated	ei-ex	1	1	E6.3		(+)AA:448(ENSP00000321507)->448(ENSP00000337180)			Diurnally Regulated Genes with Circadian Orthologs:WP410 // regulation of cellular amino acid metabolic process // polyamine biosynthetic process // cellular nitrogen compound metabolic process // negative regulation of catalytic activity // small molecule metabolic process // catalytic activity // enzyme inhibitor activity // ornithine decarboxylase activator activity // cytosol	0.893351		E6-3	TC08001501.hg	2
ENSG00000136717	0.230968		BIN1	ENSG00000136717	bridging integrator 1 [Source:HGNC Symbol;Acc:1052]	downregulated	ei-ex	1	1		E19.1_127808835	(+)AA:454(ENSP00000315284)->497(ENSP00000259238),(+)alt-coding			endocytosis // multicellular organismal development // cell proliferation // virus-host interaction // muscle cell differentiation // positive regulation of GTPase activity // positive regulation of endocytosis // protein binding // protein complex binding // protein heterodimerization activity // GTPase binding // nucleus // cytoplasm // synaptic vesicle // actin cytoskeleton // varicosity // ax…	0.275994	cassette-exon|cassetteExon	E19-1	TC02002276.hg	5
ENSG00000158019	0.292819		BRE	ENSG00000158019	brain and reproductive organ-expressed (TNFRSF1A modulator) [Source:HGNC Symbol;Acc:1106]	upregulated	ei-ex	2	1	E18.1		(+)AA:376(ENSP00000354699)->379(AAL17818.1),(+)alt-C-terminus,(+)truncated,(-)AA:44(AAL17817.1)->379(AAL17818.1)	(-)Brain/reproduct-express_prot-IPR010358,(-)REGION-UEV-like 1	(direct)REGION-UEV-like 2-UniProt	double-strand break repair // apoptosis // response to DNA damage stimulus // signal transduction // response to ionizing radiation // chromatin modification // G2/M transition DNA damage checkpoint // positive regulation of DNA repair // peroxisome targeting sequence binding // tumor necrosis factor receptor binding // protein binding // polyubiquitin binding // nuclear ubiquitin ligase complex …	0.459072	alt-3'|altThreePrime	E18-1	TC02004954.hg	5
ENSG00000165288	0.210385		BRWD3	ENSG00000165288	bromodomain and WD repeat domain containing 3 [Source:HGNC Symbol;Acc:17342]	downregulated	ei-ex	1	1		E6.1	(-)AA:1398(AAS45477.1)->1398(AAS45473.1)	(+)Bromodomain-IPR001487,(+)Quino_amine_DH_bsu-IPR011044,(+)REPEAT-WD 1,(+)REPEAT-WD 2,(+)REPEAT-WD 3,(+)REPEAT-WD 4,(+)REPEAT-WD 5,(+)REPEAT-WD 6,(+)WD40_repeat-IPR001680,(+)WD40_repeat_dom-IPR017986	(direct)REPEAT-WD 1-UniProt	cytoskeleton organization // regulation of cell shape // protein binding	-0.567966	cassetteExon	E6-1	TC0X001182.hg	4
ENSG00000148925	0.212103		BTBD10	ENSG00000148925	BTB (POZ) domain containing 10 [Source:HGNC Symbol;Acc:21445]	downregulated	ei-ex	1	1		E1.8	(+)AA:427(ENSP00000435257)->475(ENSP00000278174),(+)alt-N-terminus			protein binding // nucleus // cytoplasm	-0.218481	alt-5'|alt-N-term	E1-8	TC11001434.hg	3
ENSG00000149196	0.261029		C11orf73	ENSG00000149196	chromosome 11 open reading frame 73 [Source:HGNC Symbol;Acc:26938]	downregulated	ei-ex	1	1		E7.4	(-)AA:140(ENST00000530208-PEP)->197(ENSP00000278483),(-)alt-C-terminus,(-)alt-N-terminus,(-)microRNA-target(hsa-miR-216b:miRanda,hsa-miR-384:miRanda,hsa-miR-495:miRanda)	(-)DUF775-IPR008493		protein import into nucleus // Golgi organization // protein transport // lung development // cellular response to heat // protein transporter activity // Hsp70 protein binding // intracellular // nucleus // cytoplasm // cytosol	-0.0361783	cassetteExon|exon-region-exclusion|exon-region-exclusion	E7-4	TC11000871.hg	5
ENSG00000133943	0.214414		C14orf159	ENSG00000133943	chromosome 14 open reading frame 159 [Source:HGNC Symbol;Acc:20498]	upregulated	ei-ex	1	1	E11.1|E4.10		(+)AA:109(ENSP00000429189)->202(ENSP00000430666),(+)alt-C-terminus	(+)DUF1445-IPR009906		biological_process // molecular_function // cellular_component // mitochondrion	0.274341	cassette-exon	E4-10|E7-1	TC14000562.hg	3
ENSG00000116667	0.214051		C1orf21	ENSG00000116667	chromosome 1 open reading frame 21 [Source:HGNC Symbol;Acc:15494]	upregulated	ei-ex	1	1	E7.1		(+)AA:38(ENST00000367514-PEP)->121(ENSP00000235307),(+)alt-C-terminus,(+)alt-N-terminus	(+)MOD_RES-Phosphoserine			-1.02646	alt-N-term	E7-1	TC01001591.hg	3
ENSG00000197603	0.20391		C5orf42	ENSG00000197603	chromosome 5 open reading frame 42 [Source:HGNC Symbol;Acc:25801]	upregulated	ei-ex	1	1	E19.1		(+)AA:444(AL832176-PEP)->2263(ENSP00000424223),(+)alt-C-terminus,(+)alt-N-terminus	(+)COILED		integral to membrane	-0.242767		E19-1|E19-2	TC05001274.hg	2
ENSG00000184608	0.325238		C8orf12	ENSG00000184608	chromosome 8 open reading frame 12 [Source:HGNC Symbol;Acc:15548]	upregulated	ei-ex	1	1	E6.1		(+)AA:104(ENSP00000284481)->104(BC080558-PEP),(+)microRNA-target(hsa-miR-150:miRanda,hsa-miR-28-5p:miRanda,hsa-miR-338-3p:miRanda,hsa-miR-708:miRanda)				0.146734	cassette-exon|cassetteExon	E6-1	TC08002593.hg	5
ENSG00000176731	0.28533		C8orf59	ENSG00000176731	chromosome 8 open reading frame 59 [Source:HGNC Symbol;Acc:32235]	upregulated	ei-ex	1	1	E3.2		(+)AA:57(ENST00000520236-PEP)->59(ENSP00000430658),(+)alt-N-terminus,(+)retained_intron	(+)MOD_RES-N6-acetyllysine			0.285178	exon-region-exclusion|exon-region-exclusion	E3-2|E3-3	TC08001378.hg	3
ENSG00000122786	0.227747		CALD1	ENSG00000122786	caldesmon 1 [Source:HGNC Symbol;Acc:1441]	upregulated	ei-ex	1	1	E10.4		(-)AA:558(ENSP00000376826)->564(ENSP00000355000),(-)alt-N-terminus	(-)Caldesmon_LSP-IPR006018	(direct)Caldesmon_LSP-IPR006018	Myometrial Relaxation and Contraction Pathways:WP289 // cellular component movement // muscle contraction // actin binding // calmodulin binding // tropomyosin binding // myosin binding // cytosol // cytoskeleton // plasma membrane // actin cytoskeleton // membrane // myofibril // actin cap	-1.02887	cassette-exon	E10-4	TC07000838.hg	3
ENSG00000110931	0.220783		CAMKK2	ENSG00000110931	calcium/calmodulin-dependent protein kinase kinase 2, beta [Source:HGNC Symbol;Acc:1470]	upregulated	ei-ex	1	1	E17.1		(-)AA:498(ENSP00000445944)->541(ENSP00000336634),(-)alt-coding	(+)Kinase-like_dom-IPR011009,(+)Prot_kinase_cat_dom-IPR000719,(+)Ser/Thr_dual-sp_kinase_dom-IPR002290,(+)Tyr_kinase_cat_dom-IPR020635,(-)DOMAIN-Protein kinase,(-)HELIX,(-)Kinase-like_dom-IPR011009,(-)Prot_kinase_cat_dom-IPR000719,(-)REGION-Autoinhibitory domain,(-)REGION-Calmodulin-binding,(-)Ser/Thr_dual-sp_kinase_dom-IPR002290	(direct)STRAND-UniProt, (direct)Ser/Thr_dual-sp_kinase_dom-IPR002290, (direct)DOMAIN-Protein kinase-UniProt, (direct)HELIX-UniProt, (direct)Prot_kinase_cat_dom-IPR000719, (direct)Kinase-like_dom-IPR011009, (direct)Tyr_kinase_cat_dom-IPR020635	AMPK Signaling:WP1403 // MAPKKK cascade // protein phosphorylation // calcium-mediated signaling // regulation of protein kinase activity // positive regulation of transcription, DNA-dependent // protein autophosphorylation // protein kinase activity // protein serine/threonine kinase activity // calmodulin-dependent protein kinase activity // protein tyrosine kinase activity // calcium ion bindi…	0.0943639		E17-1	TC12002061.hg	2
ENSG00000143919	0.346595		CAMKMT	ENSG00000143919	calmodulin-lysine N-methyltransferase [Source:HGNC Symbol;Acc:26276]	upregulated	ei-ex	1	1	E9.1		(+)AA:132(ENSP00000385124)->323(ENSP00000367755),(+)microRNA-target(hsa-let-7a:miRanda,hsa-let-7b:miRanda,hsa-let-7c:miRanda,hsa-let-7d:miRanda,hsa-let-7e:miRanda,hsa-let-7f:miRanda,hsa-let-7g:miRanda,hsa-let-7i:miRanda,hsa-miR-128:miRanda,hsa-miR-140-5p:miRanda,hsa-miR-146a:miRanda,hsa-miR-148a:miRanda,hsa-miR-150:miRanda,hsa-miR-153:miRanda,hsa-miR-155:miRanda,hsa-miR-181c:miRanda,hsa-miR-200b:…	(+)Nicotinamide_N-MeTfrase-like-IPR019410		calmodulin-lysine N-methyltransferase activity // cytoplasm	0.160817	alt-C-term	E9-1	TC02000276.hg	3
ENSG00000108509	0.266951		CAMTA2	ENSG00000108509	calmodulin binding transcription activator 2 [Source:HGNC Symbol;Acc:18807]	upregulated	ei-ex	1	1	E9.1_4885142		(-)AA:1201(ENSP00000354828)->1202(ENSP00000321813),(-)alt-N-terminus	(+)CG-1_dom-IPR005559,(-)CG-1_dom-IPR005559,(-)DNA_BIND-CG-1	(direct)CG-1_dom-IPR005559, (direct)DNA_BIND-CG-1-UniProt	transcription, DNA-dependent // regulation of transcription from RNA polymerase II promoter // cardiac muscle hypertrophy in response to stress // positive regulation of transcription from RNA polymerase II promoter // DNA binding // chromatin binding // protein binding // transcription factor binding // histone deacetylase binding // nucleus	0.36531	alt-3'	E9-1	TC17001039.hg	3
ENSG00000110888	0.310031		CAPRIN2	ENSG00000110888	caprin family member 2 [Source:HGNC Symbol;Acc:21259]	upregulated	ei-ex	5	2	E17.2	E19.3_30868031	(+)AA:905(ENSP00000379150)->1127(ENSP00000251071),(+)AA:905(ENSP00000379150)->960(ENSP00000391479),(+)alt-C-terminus,(+)alt-coding	(+)C1q-IPR001073,(+)Caprin-1_C-IPR022070,(+)DOMAIN-C1q,(+)Tumour_necrosis_fac-like_dom-IPR008983,(-)Caprin-1_C-IPR022070	(direct)Caprin-1_C-IPR022070	negative regulation of translation // negative regulation of cell growth // positive regulation of protein binding // positive regulation of peptidyl-serine phosphorylation // cellular metabolic process // positive regulation of transcription from RNA polymerase II promoter // positive regulation of dendrite morphogenesis // positive regulation of dendritic spine morphogenesis // positive regulat…	-0.485767	altThreePrime|exon-region-exclusion|exon-region-exclusion, exon-region-exclusion	E17-2|E19-2|E19-3	TC12001355.hg	5
ENSG00000105483	0.284448		CARD8	ENSG00000105483	caspase recruitment domain family, member 8 [Source:HGNC Symbol;Acc:17057]	upregulated	ei-ex	2	2	E13.1_48725128|E9.3,E9.3		(+)AA:24(ENSP00000430460)->132(ENSP00000429741),(+)alt-C-terminus,(+)alt-N-terminus,(+)nonsense_mediated_decay			NOD pathway:WP1433 // activation of caspase activity // regulation of apoptosis // negative regulation of I-kappaB kinase/NF-kappaB cascade // positive regulation of caspase activity // positive regulation of interleukin-1 beta secretion // protein binding // caspase activator activity // NACHT domain binding // protein homodimerization activity // intracellular // nucleus // cytoplasm // NALP3 i…	-0.0104404	cassette-exon|cassetteExon	E13-1|E9-3	TC19001677.hg	5
ENSG00000127995	0.40968		CASD1	ENSG00000127995	CAS1 domain containing 1 [Source:HGNC Symbol;Acc:16014]	downregulated	ei-ex	3	1		E4.1	(+)AA:103(ENSP00000402708)->125(ENSP00000396261),(+)alt-C-terminus,(+)alt-N-terminus,(+)nonsense_mediated_decay,(-)AA:103(ENSP00000402708)->125(ENSP00000396261),(-)alt-C-terminus,(-)alt-N-terminus,(-)nonsense_mediated_decay	(+)SIGNAL,(-)SIGNAL	(direct)Cyclin-like-IPR013763	protein binding // integral to membrane	0.329604	cassette-exon	E4-1	TC07000561.hg	3
ENSG00000137752	0.201025		CASP1	ENSG00000137752	caspase 1, apoptosis-related cysteine peptidase [Source:HGNC Symbol;Acc:1499]	upregulated	ei-ex	1	1	E7.1		(-)AA:263(ENSP00000472457)->383(ENSP00000469724),(-)alt-coding	(+)Pept_C14_ICE_p20-IPR001309,(+)Pept_C14_cat-IPR011600,(+)Pept_C14_p10-IPR002138,(+)Pept_C14_p45_core-IPR015917,(-)CARD-IPR001315,(-)Caspase_IL-1_beta-IPR017350,(-)DEATH-like_dom-IPR011029,(-)DOMAIN-CARD,(-)HELIX,(-)Pept_C14_ICE_p20-IPR001309,(-)Pept_C14_cat-IPR011600,(-)Pept_C14_p10-IPR002138,(-)Pept_C14_p45_core-IPR015917,(-)STRAND	(direct)Caspase_IL-1_beta-IPR017350, (direct)Pept_C14_p45_core-IPR015917, (direct)Pept_C14_p10-IPR002138, (direct)Pept_C14_ICE_p20-IPR001309, (direct)HELIX-UniProt, (direct)Pept_C14_cat-IPR011600	MAPK Signaling Pathway:WP382 // Parkin-Ubiquitin Proteasomal System pathway:WP2359 // NOD pathway:WP1433 // Amyotrophic lateral sclerosis (ALS):WP2447 // Apoptosis:WP254 // response to hypoxia // proteolysis // apoptosis // induction of apoptosis // activation of caspase activity // signal transduction // cell death // protein processing // interleukin-1 beta production // response to ATP // nucl…	-0.4629	cassette-exon|cassetteExon	E7-1	TC11003505.hg	5
ENSG00000153113	0.225853		CAST	ENSG00000153113	calpastatin [Source:HGNC Symbol;Acc:1515]	downregulated	ei-ex	1	1		E26.3|E27.1	(+)AA:54(ENST00000512191-PEP)->91(ENSP00000423846),(+)alt-C-terminus,(+)alt-N-terminus,(+)retained_intron	(+)MOD_RES-Phosphoserine,(+)Prot_inh_calpain-IPR001259	(direct)REPEAT-Inhibitory domain 2-UniProt, (direct)Prot_inh_calpain-IPR001259	negative regulation of peptidase activity // negative regulation of endopeptidase activity // endopeptidase inhibitor activity // cysteine-type endopeptidase inhibitor activity // protein binding // membrane	-0.15672	cassette-exon	E27-1	TC05000469.hg	3
ENSG00000172785	0.252574		CBWD1	ENSG00000172785	COBW domain containing 1 [Source:HGNC Symbol;Acc:17134]	upregulated	ei-ex	1	1	E22.1_135046		(+)AA:104(ENST00000487575-PEP)->376(ENSP00000371885),(+)alt-N-terminus	(+)Cbl_biosynth_CobW-like_C-IPR011629,(+)CobW/HypB/UreG_dom-IPR003495,(+)DOMAIN-CobW C-terminal,(+)NP_BIND-ATP,(+)P-loop_NTPase-IPR027417	(direct)P-loop_NTPase-IPR027417	ATP binding	0.186269		E22-1	TC09000864.hg	2
ENSG00000136682	0.222392		CBWD2	ENSG00000136682	COBW domain containing 2 [Source:HGNC Symbol;Acc:17907]	downregulated	ei-ex	1	1		I11.7_114224060	(-)AA:359(ENSP00000401945)->376(ENSP00000411906),(-)alt-N-terminus	(+)P-loop_NTPase-IPR027417,(-)COMPBIAS-Poly-Glu,(-)CobW/HypB/UreG_dom-IPR003495,(-)NP_BIND-ATP,(-)P-loop_NTPase-IPR027417	(indirect)P-loop_NTPase-IPR027417	ATP binding	-0.117557			TC02000725.hg	2
ENSG00000196873	0.230973		CBWD3	ENSG00000196873	COBW domain containing 3 [Source:HGNC Symbol;Acc:18519]	downregulated	ei-ex	1	1		I13.1_70885218				ATP binding	-0.0622952			TC09000308.hg	2
ENSG00000147996	0.238399		CBWD5	ENSG00000147996	COBW domain containing 5 [Source:HGNC Symbol;Acc:24584]	upregulated	ei-ex	1	1	E23.3_7044602		(+)AA:180(AAH67803.1)->376(ENSP00000397999),(-)truncated	(+)Cbl_biosynth_CobW-like_C-IPR011629,(+)CobW/HypB/UreG_dom-IPR003495,(+)DOMAIN-CobW C-terminal,(+)NP_BIND-ATP,(+)P-loop_NTPase-IPR027417,(-)P-loop_NTPase-IPR027417	(direct)P-loop_NTPase-IPR027417	ATP binding	-0.00507167	cassette-exon	E23-2|E23-3	TC09001181.hg	3
ENSG00000204790	0.305756		CBWD6	ENSG00000204790	COBW domain containing 6 [Source:HGNC Symbol;Acc:31978]	upregulated	ei-ex	2	2	E18.2_69218577,E18.2_69218577|E14.1		(+)AA:36(ENST00000494632-PEP)->73(ENST00000485382-PEP),(+)alt-C-terminus,(+)alt-N-terminus,(+)truncated,(-)AA:180(ENST00000495626-PEP)->395(ENSP00000366677)	(+)NP_BIND-ATP,(-)Cbl_biosynth_CobW-like_C-IPR011629,(-)CobW/HypB/UreG_dom-IPR003495,(-)DOMAIN-CobW C-terminal,(-)NP_BIND-ATP,(-)P-loop_NTPase-IPR027417	(direct)P-loop_NTPase-IPR027417	ATP binding	0.0381733		E18-1|E18-2	TC09001170.hg	2
ENSG00000215126	0.293684		CBWD7	ENSG00000215126	COBW domain containing 7 [Source:HGNC Symbol;Acc:31977]	downregulated	ei-ex	2	2		E11.1|E13.2,E5.2	(+)AA:126(ENST00000460896-PEP)->252(ENSP00000366608),(+)AA:73(ENST00000467791-PEP)->233(ENSP00000401079),(+)alt-C-terminus,(+)alt-N-terminus	(+)Cbl_biosynth_CobW-like_C-IPR011629,(+)CobW/HypB/UreG_dom-IPR003495,(+)DOMAIN-CobW C-terminal,(+)NP_BIND-ATP,(+)P-loop_NTPase-IPR027417	(indirect)P-loop_NTPase-IPR027417	ATP binding	-0.250742	cassette-exon, mutually-exclusive-exon	E11-1|E5-2	TC09000247.hg	3
ENSG00000060339	0.361058		CCAR1	ENSG00000060339	cell division cycle and apoptosis regulator 1 [Source:HGNC Symbol;Acc:24236]	upregulated	ei-ex	5	2	E16.1,E17.1		(+)AA:568(ENSP00000437760)->1150(ENSP00000265872),(+)nonsense_mediated_decay,(+)truncated,(-)AA:48(ENSP00000440224)->568(ENSP00000439153),(-)AA:568(ENSP00000437760)->1150(ENSP00000265872),(-)alt-C-terminus,(-)alt-N-terminus,(-)nonsense_mediated_decay,(-)truncated	(+)COILED,(+)COMPBIAS-Glu-rich,(+)CROSSLNK-Glycyl lysine isopeptide (Lys-Gly) (interchain with G-Cter in ubiquitin),(+)DOMAIN-SAP,(+)MOD_RES-Phosphoserine,(+)MOD_RES-Phosphothreonine,(+)SAP_dom-IPR003034,(-)COILED,(-)COMPBIAS-Arg-rich,(-)COMPBIAS-Glu-rich,(-)COMPBIAS-Poly-Ala,(-)CROSSLNK-Glycyl lysine isopeptide (Lys-Gly) (interchain with G-Cter in ubiquitin),(-)DOMAIN-SAP,(-)MOD_RES-Phosphoserin…	(indirect)COILED--UniProt, (direct)COILED-UniProt	nuclear mRNA splicing, via spliceosome // transcription, DNA-dependent // regulation of transcription, DNA-dependent // apoptosis // cell cycle // RNA splicing // gene expression // nucleic acid binding // protein binding // ligand-dependent nuclear receptor transcription coactivator activity // nucleoplasm // perinuclear region of cytoplasm	-0.7359	cassetteExon|mutually-exclusive-exon, mutually-exclusive-exon	E16-1|E17-1	TC10000408.hg	5
ENSG00000171097	0.306104		CCBL1	ENSG00000171097	cysteine conjugate-beta lyase, cytoplasmic [Source:HGNC Symbol;Acc:1564]	upregulated	ei-ex	2	1	E11.1_131600432		(+)AA:92(ENST00000474824-PEP)->372(ENSP00000317342),(-)AA:372(ENSP00000317342)->422(BAF83867.1),(-)alt-coding,(-)truncated	(+)Aminotransferase_I/II-IPR004839,(+)BINDING-Substrate,(+)HELIX,(+)MOD_RES-N6-(pyridoxal phosphate)lysine,(+)PyrdxlP-dep_Trfase-IPR015424,(+)STRAND,(+)TURN,(-)Aminotransferase_I/II-IPR004839,(-)Cys/Met-Metab_PyrdxlP-dep_enz-IPR000277,(-)HELIX,(-)PyrdxlP-dep_Trfase-IPR015424,(-)STRAND	(direct)STRAND-UniProt, (direct)PyrdxlP-dep_Trfase-IPR015424, (direct)Aminotransferase_I/II-IPR004839, (direct)Cys/Met-Metab_PyrdxlP-dep_enz-IPR000277	L-phenylalanine catabolic process // tryptophan catabolic process // cellular modified amino acid metabolic process // cellular amino acid biosynthetic process // biosynthetic process // cellular nitrogen compound metabolic process // small molecule metabolic process // kynurenine metabolic process // L-kynurenine catabolic process // catalytic activity // transaminase activity // kynurenine-oxog…	-0.0866117		E11-1	TC09001640.hg	2
ENSG00000163006	0.294096		CCDC138	ENSG00000163006	coiled-coil domain containing 138 [Source:HGNC Symbol;Acc:26531]	downregulated	ei-ex	3	1		E2.1	(+)AA:16(ENST00000470608-PEP)->45(ENSP00000407328),(+)alt-C-terminus,(+)alt-N-terminus,(+)nonsense_mediated_decay,(+)truncated,(-)AA:16(ENST00000470608-PEP)->45(ENSP00000407328),(-)AA:45(ENSP00000407328)->104(ENSP00000386418),(-)alt-C-terminus,(-)alt-N-terminus,(-)nonsense_mediated_decay				-0.474871	alt-5', cassette-exon	E1-6|E2-1	TC02000669.hg	3
ENSG00000175455	0.226004		CCDC14	ENSG00000175455	coiled-coil domain containing 14 [Source:HGNC Symbol;Acc:25766]	downregulated	ei-ex	1	1		E2.10	(-)AA:753(ENSP00000418002)->753(ENSP00000418403)			centrosome	-0.398843	alt-C-term|alt-5'|cassette-exon|cassetteExon	E2-10|E2-11	TC03001714.hg	5
ENSG00000163492	0.239739		CCDC141	ENSG00000163492	coiled-coil domain containing 141 [Source:HGNC Symbol;Acc:26821]	downregulated	ei-ex	1	1		E10.1_179770244	(-)AA:96(ENST00000498142-PEP)->652(ENSP00000386503),(-)alt-C-terminus,(-)alt-N-terminus	(-)Spectrin_repeat-IPR002017,(-)tRNA-bd_arm-IPR010978		nucleotide binding // protein binding	-0.528746		E10-1	TC02005048.hg	2
ENSG00000266302	0.265046		CCDC144A	ENSG00000266302	Coiled-coil domain-containing protein 144A; Uncharacterized protein [Source:UniProtKB/TrEMBL;Acc:C9JT67]	upregulated	ei-ex	1	1	I8.1_16630374						-0.997832			TC17002870.hg	2
ENSG00000154898	0.30382		CCDC144CP	ENSG00000154898	coiled-coil domain containing 144C, pseudogene [Source:HGNC Symbol;Acc:29073]	downregulated	ei-ex	2	2		E10.1,E9.1|E10.1	(-)microRNA-target(hsa-miR-128:miRanda,hsa-miR-27a:miRanda,hsa-miR-27b:miRanda,hsa-miR-377:miRanda,hsa-miR-487b:miRanda)				-1.11143	cassette-exon	E10-1|E9-1	TC17000252.hg	3
ENSG00000135205	0.395315		CCDC146	ENSG00000135205	coiled-coil domain containing 146 [Source:HGNC Symbol;Acc:29296]	downregulated	ei-ex	2	1		E18.2	(+)AA:130(ENST00000474733-PEP)->292(ENST00000461259-PEP),(+)alt-C-terminus,(+)alt-N-terminus,(+)retained_intron,(-)AA:130(ENST00000474733-PEP)->292(ENST00000461259-PEP),(-)alt-C-terminus,(-)alt-N-terminus,(-)retained_intron	(+)COILED,(-)COILED	(direct)COILED-UniProt		-1.56917	alt-5'	E18-2	TC07003312.hg	3
ENSG00000144395	0.305637		CCDC150	ENSG00000144395	coiled-coil domain containing 150 [Source:HGNC Symbol;Acc:26834]	upregulated	ei-ex	1	1	E28.1		(-)AA:47(ENST00000461243-PEP)->417(ENSP00000413957),(-)alt-C-terminus,(-)alt-N-terminus,(-)nonsense_mediated_decay				-0.714713	alt-3'|cassette-exon	E28-1	TC02001141.hg	3
ENSG00000122483	0.205301		CCDC18	ENSG00000122483	coiled-coil domain containing 18 [Source:HGNC Symbol;Acc:30370]	downregulated	ei-ex	1	1		E1.10	(-)AA:1454(ENSP00000343377)->1508(ENSP00000359299),(-)alt-N-terminus			nucleotide binding	-0.875553	alt-5'	E1-10	TC01000860.hg	3
ENSG00000180376	0.279776		CCDC66	ENSG00000180376	coiled-coil domain containing 66 [Source:HGNC Symbol;Acc:27709]	downregulated	ei-ex	3	3		E5.1,E5.1|E6.1,E6.1	(+)AA:60(ENSP00000390652)->197(ENST00000460838-PEP),(+)alt-C-terminus,(+)alt-N-terminus,(+)nonsense_mediated_decay,(-)AA:147(ENST00000459746-PEP)->156(ENST00000469966-PEP),(-)alt-C-terminus,(-)alt-N-terminus	(+)MOD_RES-Phosphothreonine		retinal rod cell development // post-embryonic retina morphogenesis in camera-type eye	-0.391853	cassette-exon, cassetteExon|mutually-exclusive-exon	E5-1|E6-1	TC03000362.hg	5
ENSG00000216937	0.323201		CCDC7	ENSG00000216937	coiled-coil domain containing 7 [Source:HGNC Symbol;Acc:26533]	upregulated	ei-ex	2	2	E12.1	E7.1	(+)AA:173(ENSP00000441041)->175(ENSP00000440632),(+)alt-C-terminus,(-)AA:171(ENSP00000442531)->217(CU692458-PEP),(-)alt-C-terminus,(-)microRNA-target(hsa-miR-134:miRanda,hsa-miR-300:miRanda,hsa-miR-381:miRanda,hsa-miR-429:miRanda,hsa-miR-448:miRanda,hsa-miR-544:miRanda|mirbase)		(direct)COILED-UniProt		-0.504795	cassette-exon, cassette-exon|cassetteExon	E12-1|E7-1	TC10000228.hg	5
ENSG00000115355	0.243233		CCDC88A	ENSG00000115355	coiled-coil domain containing 88A [Source:HGNC Symbol;Acc:25523]	downregulated	ei-ex	1	1		E26.1_55539731			(direct)COILED-UniProt	microtubule cytoskeleton organization // regulation of protein phosphorylation // DNA replication // regulation of DNA replication // regulation of neuron projection development // cellular membrane organization // vesicle-mediated transport // cell migration // lamellipodium assembly // TOR signaling cascade // activation of protein kinase B activity // regulation of actin cytoskeleton organizat…	-1.00166	alt-C-term	E26-1	TC02001860.hg	3
ENSG00000123106	0.213844		CCDC91	ENSG00000123106	coiled-coil domain containing 91 [Source:HGNC Symbol;Acc:24855]	upregulated	ei-ex	1	1	E22.1		(+)AA:405(ENSP00000370655)->441(ENSP00000370658),(+)alt-coding,(+)microRNA-target(hsa-miR-214:RNAhybrid|miRanda)	(+)COILED,(+)REGION-Homodimerization	(indirect)COILED--UniProt, (indirect)REGION-Homodimerization-UniProt	protein transport // identical protein binding // nucleus // Golgi apparatus // membrane	-0.914668	cassette-exon|cassetteExon	E22-1	TC12000274.hg	5
ENSG00000163468	0.48648		CCT3	ENSG00000163468	chaperonin containing TCP1, subunit 3 (gamma) [Source:HGNC Symbol;Acc:1616]	upregulated	ei-ex	4	2	E6.1_156304725,E6.1_156304725|E2.11		(-)AA:40(ENSP00000357241)->500(ENSP00000357244),(-)AA:40(ENSP00000357241)->500(ENSP00000431543),(-)alt-C-terminus,(-)alt-N-terminus,(-)nonsense_mediated_decay	(-)Chap_CCT_gamma-IPR012719,(-)Chaperone_TCP-1-IPR017998,(-)Chaprnin_Cpn60-IPR001844,(-)Cpn60/TCP-1-IPR002423,(-)DISULFID,(-)GroEL-like_apical_dom-IPR027409,(-)MOD_RES-N6-acetyllysine,(-)MOD_RES-Phosphoserine	(direct)Chap_CCT_gamma-IPR012719, (direct)Cpn60/TCP-1-IPR002423	protein folding // binding of sperm to zona pellucida // cellular protein metabolic process // 'de novo' posttranslational protein folding // protein binding // ATP binding // unfolded protein binding // cytoplasm // cytosol // chaperonin-containing T-complex // cytoskeleton // microtubule // plasma membrane	-0.0986467	cassette-exon|cassetteExon	E6-1	TC01003337.hg	5
ENSG00000002586	0.216229		CD99	ENSG00000002586	CD99 molecule [Source:HGNC Symbol;Acc:7082]	upregulated	ei-ex	1	1	E13.1		(+)microRNA-target(hsa-miR-100*:mirbase,hsa-miR-10b*:mirbase,hsa-miR-127-3p:mirbase,hsa-miR-127-5p:mirbase,hsa-miR-147b:mirbase,hsa-miR-198:mirbase,hsa-miR-208:mirbase,hsa-miR-208b:mirbase,hsa-miR-210:mirbase,hsa-miR-214:mirbase,hsa-miR-25*:mirbase,hsa-miR-374b*:mirbase,hsa-miR-376a*:mirbase,hsa-miR-491-3p:mirbase,hsa-miR-522:mirbase,hsa-miR-556-5p:mirbase,hsa-miR-577:mirbase,hsa-miR-584:mirbase,…			cell adhesion // cytoplasm // plasma membrane // integral to plasma membrane	-0.0601597	alt-C-term	E13-1	TC0X000014.hg	3
ENSG00000070831	0.235554		CDC42	ENSG00000070831	cell division cycle 42 [Source:HGNC Symbol;Acc:1736]	downregulated	ei-ex	1	1		E5.2|E6.1	(-)AA:191(ENSP00000314458)->236(BAG64911.1),(-)alt-C-terminus,(-)microRNA-target(hsa-miR-186:RNAhybrid|TargetScan|miRanda|mirbase|pictar,hsa-miR-300:TargetScan|miRanda,hsa-miR-381:TargetScan|miRanda,hsa-miR-448:TargetScan|miRanda,hsa-miR-186:RNAhybrid|TargetScan|miRanda|mirbase|pictar,hsa-miR-300:TargetScan|miRanda,hsa-miR-381:TargetScan|miRanda,hsa-miR-448:TargetScan|miRanda)	(+)MIRO-like-IPR013684,(+)MOD_RES-O-AMP-threonine; by Vibrio VopS,(+)MOTIF-Effector region,(+)P-loop_NTPase-IPR027417,(+)Small_GTP-bd_dom-IPR005225,(+)Small_GTPase-IPR001806,(+)Small_GTPase_ARF/SAR-IPR006689,(+)Small_GTPase_Rab_type-IPR003579,(+)Small_GTPase_Ras-IPR020849,(+)Small_GTPase_Rho-IPR003578,(-)LIPID-S-geranylgeranyl cysteine,(-)MOD_RES-Cysteine methyl ester,(-)P-loop_NTPase-IPR027417,(…	(direct)STRAND-UniProt, (direct)MOTIF-Effector region-UniProt, (direct)Small_GTPase_Ras-IPR020849, (direct)P-loop_NTPase-IPR027417, (direct)Small_GTPase_ARF/SAR-IPR006689, (direct)Small_GTPase-IPR001806, (direct)NP_BIND-GTP-UniProt, (direct)Small_GTPase_Rab_type-IPR003579, (direct)Small_GTPase_Rho-IPR003578, (direct)MIRO-like-IPR013684, (direct)Small_GTP-bd_dom-IPR005225	TOR Signaling:WP1471 // BDNF signaling pathway:WP2380 // RalA downstream regulated genes:WP2290 // Regulation of Microtubule Cytoskeleton:WP2038 // RANKL/RANK Signaling Pathway:WP2018 // Focal Adhesion:WP306 // Androgen receptor signaling pathway:WP138 // MAPK Signaling Pathway:WP382 // Pathogenic Escherichia coli infection:KEGG-hsa05130:WP2272 // AGE/RAGE pathway:WP2324 // Spinal Cord Injury:WP2…	0.270928	cassetteExon	E6-1	TC01000280.hg	4
ENSG00000123219	0.247273		CENPK	ENSG00000123219	centromere protein K [Source:HGNC Symbol;Acc:29479]	upregulated	ei-ex	3	3	E3.2,E8.1_64838691	E3.2|E3.3	(-)AA:107(ENST00000506282-PEP)->239(ENSP00000421034),(-)AA:107(ENST00000506282-PEP)->269(ENSP00000422421),(-)alt-C-terminus,(-)alt-N-terminus	(-)COILED,(-)Centromere_CenpK-IPR020993,(-)SITE-Breakpoint for translocation to form KMT2A/MLL1-CENPK oncogene,(~)Prefoldin-IPR009053	(direct)Centromere_CenpK-IPR020993, (direct)Prefoldin-IPR009053	M phase of mitotic cell cycle // mitotic anaphase // mitotic prometaphase // mitotic cell cycle // nucleosome assembly // CenH3-containing nucleosome assembly at centromere // positive regulation of transcription from RNA polymerase II promoter // protein binding // condensed chromosome kinetochore // nucleus // nucleoplasm // cytosol	-0.469373	alt-5'|altFivePrime	E3-2|E3-3|E8-1	TC05001408.hg	5
ENSG00000154240	0.206368		CEP112	ENSG00000154240	centrosomal protein 112kDa [Source:HGNC Symbol;Acc:28514]	upregulated	ei-ex	1	1	E8.1		(-)AA:913(ENSP00000440775)->955(ENSP00000376522),(-)alt-coding			vesicle-mediated transport // cytoplasm // centrosome // plasma membrane // membrane // inhibitory synapse	-1.09611		E8-1	TC17002856.hg	2
ENSG00000126001	0.248553		CEP250	ENSG00000126001	centrosomal protein 250kDa [Source:HGNC Symbol;Acc:1859]	upregulated	ei-ex	1	1	E9.1		(+)AA:164(ENSP00000398747)->339(ENSP00000380658),(-)truncated	(+)COMPBIAS-Poly-Leu		G2/M transition of mitotic cell cycle // mitotic cell cycle // protein localization // centriole-centriole cohesion // regulation of centriole-centriole cohesion // protein binding // protein C-terminus binding // protein kinase binding // centrosome // centriole // microtubule organizing center // cytosol // cilium // microtubule basal body // spindle pole centrosome // protein complex // perinu…	-0.577508	alt-3'	E9-1	TC20000253.hg	3
ENSG00000164118	0.209423		CEP44	ENSG00000164118	centrosomal protein 44kDa [Source:HGNC Symbol;Acc:29356]	upregulated	ei-ex	1	1	E1.9|E2.1		(+)AA:112(ENSP00000427337)->139(ENSP00000423922),(+)alt-C-terminus			spindle pole // cytoplasm // centrosome // midbody	-0.435185	mutually-exclusive-exon	E2-1	TC04000859.hg	3
ENSG00000182923	0.210532		CEP63	ENSG00000182923	centrosomal protein 63kDa [Source:HGNC Symbol;Acc:25815]	downregulated	ei-ex	1	1		E8.4	(-)AA:155(ENSP00000422685)->495(ENSP00000328382),(-)alt-C-terminus,(-)alt-N-terminus	(-)COILED	(direct)COILED-UniProt	DNA damage checkpoint // G2/M transition of mitotic cell cycle // mitotic cell cycle // mitosis // signal transduction in response to DNA damage // spindle assembly // cell division // protein binding // spindle pole // centrosome // cytosol	-0.463974	alt-5'	E8-4	TC03000729.hg	3
ENSG00000114107	0.217726		CEP70	ENSG00000114107	centrosomal protein 70kDa [Source:HGNC Symbol;Acc:29972]	downregulated	ei-ex	2	2	E10.1_138256205|E5.2	E2.8	(-)AA:30(ENST00000460967-PEP)->237(ENST00000478673-PEP),(-)AA:445(ENSP00000417821)->577(ENSP00000444128),(-)alt-C-terminus,(-)alt-N-terminus	(-)COILED	(direct)COILED-UniProt	G2/M transition of mitotic cell cycle // mitotic cell cycle // protein binding // nucleus // cytoplasm // centrosome // cytosol // nuclear membrane	-0.64472	cassette-exon	E10-1|E2-8	TC03001823.hg	3
ENSG00000183765	0.235093		CHEK2	ENSG00000183765	checkpoint kinase 2 [Source:HGNC Symbol;Acc:16627]	upregulated	ei-ex	3	3	E15.1,E17.1_29095941,E19.1_29091877		(+)AA:289(ENSP00000372007)->514(ENSP00000329012),(+)alt-C-terminus,(-)AA:289(ENSP00000372007)->514(ENSP00000329012),(-)alt-C-terminus	(+)HELIX,(+)Kinase-like_dom-IPR011009,(+)MOD_RES-Phosphoserine,(+)MOD_RES-Phosphoserine; by autocatalysis,(+)MOD_RES-Phosphothreonine; by autocatalysis,(+)NP_BIND-ATP,(+)Prot_kinase_cat_dom-IPR000719,(+)REGION-T-loop/activation segment,(+)STRAND,(+)Ser-Thr/Tyr_kinase_cat_dom-IPR001245,(+)Ser/Thr_dual-sp_kinase_dom-IPR002290,(+)TURN,(+)Tyr_kinase_cat_dom-IPR020635,(-)HELIX,(-)Kinase-like_dom-IPR01…	(direct)STRAND-UniProt, (direct)NP_BIND-ATP-UniProt, (direct)Ser-Thr/Tyr_kinase_cat_dom-IPR001245, (direct)Ser/Thr_dual-sp_kinase_dom-IPR002290, (direct)DOMAIN-Protein kinase-UniProt, (direct)HELIX-UniProt, (direct)Prot_kinase_cat_dom-IPR000719, (direct)Kinase-like_dom-IPR011009, (direct)Tyr_kinase_cat_dom-IPR020635	Cell Cycle:WP179 // miRNA Regulation of DNA Damage Response:WP1530 // DNA Damage Response:WP707 // cell cycle checkpoint // DNA damage checkpoint // G2/M transition of mitotic cell cycle // double-strand break repair // transcription, DNA-dependent // regulation of transcription, DNA-dependent // protein phosphorylation // apoptosis // response to DNA damage stimulus // DNA damage induced protein…	-0.0215298	alt-3'|cassette-exon|cassetteExon, cassette-exon|cassetteExon	E15-1|E17-1|E19-1	TC22000626.hg	5
ENSG00000106069	0.234037		CHN2	ENSG00000106069	chimerin 2 [Source:HGNC Symbol;Acc:1944]	upregulated	ei-ex	2	2	I11.2_29242901	E16.1	(+)AA:34(ENST00000483081-PEP)->86(ENST00000409922-PEP),(+)alt-C-terminus,(+)alt-N-terminus,(-)AA:34(ENST00000483081-PEP)->86(ENST00000409922-PEP),(-)alt-C-terminus,(-)alt-N-terminus	(+)HELIX,(-)HELIX	(indirect)RhoGAP_dom-IPR000198, (indirect)N-chimaerin-IPR017356	signal transduction // small GTPase mediated signal transduction // intracellular signal transduction // positive regulation of GTPase activity // regulation of small GTPase mediated signal transduction // SH3/SH2 adaptor activity // GTPase activator activity // protein binding // metal ion binding // intracellular // cytosol // membrane	-0.0939509	cassette-exon	|E16-1	TC07003388.hg	3
ENSG00000074054	0.499084		CLASP1	ENSG00000074054	cytoplasmic linker associated protein 1 [Source:HGNC Symbol;Acc:17088]	upregulated	ei-ex	8	7	E36.3_122165304,E37.1,E39.1_122159462,E40.1_122159264	E32.1,E36.1_122165307,E40.1_122159264	(+)AA:1478(ENSP00000380717)->1538(ENSP00000263710),(+)alt-coding,(-)AA:1477(ENSP00000441625)->1538(ENSP00000263710),(-)AA:1478(ENSP00000380717)->1494(ENSP00000389372),(-)AA:1478(ENSP00000380717)->1538(ENSP00000263710),(-)AA:1494(ENSP00000389372)->1538(ENSP00000263710),(-)alt-coding	(+)ARM-type_fold-IPR016024,(+)COMPBIAS-Ser-rich,(+)REGION-Interaction with microtubules, MAPRE1 and MAPRE3,(-)ARM-type_fold-IPR016024,(-)COMPBIAS-Ser-rich,(-)MOD_RES-Phosphoserine,(-)REGION-Interaction with microtubules, MAPRE1 and MAPRE3	MAPRE1 and MAPRE3-UniProt, (direct)ARM-type_fold-IPR016024, (direct)REGION-Interaction with microtubules	Regulation of Microtubule Cytoskeleton:WP2038 // G2/M transition of mitotic cell cycle // M phase of mitotic cell cycle // mitotic anaphase // microtubule cytoskeleton organization // mitotic prometaphase // mitotic cell cycle // microtubule bundle formation // microtubule nucleation // negative regulation of microtubule depolymerization // establishment or maintenance of cell polarity // axon gu…	-0.18361	alt-3'|altThreePrime, alt-C-term, mutually-exclusive-exon	E32-1|E36-1|E36-3|E37-1|E39-1|E40-1	TC02002264.hg	5
ENSG00000069493	0.201701		CLEC2D	ENSG00000069493	C-type lectin domain family 2, member D [Source:HGNC Symbol;Acc:14351]	upregulated	ei-ex	1	1	E7.1		(-)AA:95(ENSP00000444818)->132(ENSP00000443065),(-)alt-coding	(-)Herpes_UL45-like-IPR008646,(-)TOPO_DOM-Cytoplasmic,(-)TRANSMEM-Helical; Signal-anchor for type II membrane protein;	(indirect)TOPO_DOM-Cytoplasmic-UniProt	cell surface receptor linked signaling pathway // transmembrane receptor activity // carbohydrate binding // endoplasmic reticulum // integral to plasma membrane // cell surface // membrane	-0.202937	cassette-exon	E7-1	TC12003236.hg	3
ENSG00000113240	0.338843		CLK4	ENSG00000113240	CDC-like kinase 4 [Source:HGNC Symbol;Acc:13659]	upregulated	ei-ex	3	2	E3.2,E6.1_178045795		(+)AA:53(ENSP00000428651)->481(ENSP00000316948),(+)AA:89(ENSP00000430216)->129(ENST00000520126-PEP),(+)alt-C-terminus,(+)nonsense_mediated_decay,(+)retained_intron,(-)truncated	(+)ACT_SITE-Proton acceptor,(+)BINDING-ATP,(+)DOMAIN-Protein kinase,(+)Kinase-like_dom-IPR011009,(+)MOD_RES-Phosphoserine,(+)NP_BIND-ATP,(+)Prot_kinase_cat_dom-IPR000719,(+)Ser-Thr/Tyr_kinase_cat_dom-IPR001245,(+)Ser/Thr_dual-sp_kinase_dom-IPR002290,(+)Tyr_kinase_cat_dom-IPR020635		mRNA Processing:WP411 // protein phosphorylation // peptidyl-tyrosine phosphorylation // regulation of RNA splicing // protein autophosphorylation // protein kinase activity // protein serine/threonine kinase activity // protein serine/threonine/tyrosine kinase activity // protein tyrosine kinase activity // ATP binding // transferase activity, transferring phosphorus-containing groups // nucleus	-0.0151433	exon-region-exclusion	E3-2|E6-1	TC05002125.hg	3
ENSG00000187118	0.239319		CMC1	ENSG00000187118	COX assembly mitochondrial protein 1 homolog (S. cerevisiae) [Source:HGNC Symbol;Acc:28783]	upregulated	ei-ex	2	2	E4.2,E6.1		(-)AA:76(ENSP00000404581)->84(ENST00000396610-PEP),(-)alt-N-terminus,(-)retained_intron		(indirect)Cyt_c_biogenesis_Cmc1-like-IPR013892	metal ion binding // mitochondrion	-0.441638	alt-N-term, alt-N-term|cassette-exon	E4-2|E6-1	TC03000141.hg	3
ENSG00000184220	0.336442		CMSS1	ENSG00000184220	cms1 ribosomal small subunit homolog (yeast) [Source:HGNC Symbol;Acc:28666]	downregulated	ei-ex	2	1		E8.1	(+)AA:26(ENSP00000418855)->38(ENSP00000418609),(+)alt-C-terminus,(+)alt-N-terminus,(+)nonsense_mediated_decay,(-)AA:26(ENSP00000418855)->38(ENSP00000418609),(-)alt-C-terminus,(-)alt-N-terminus,(-)nonsense_mediated_decay			nucleic acid binding // ATP binding // ATP-dependent helicase activity	-0.0683367	alt-C-term|mutually-exclusive-exon	E8-1	TC03000503.hg	3
ENSG00000125107	0.23037		CNOT1	ENSG00000125107	CCR4-NOT transcription complex, subunit 1 [Source:HGNC Symbol;Acc:7877]	downregulated	ei-ex	1	1		E43.3_58568282	(-)AA:241(ENSP00000458057)->1070(BAG51828.1),(-)alt-C-terminus,(-)alt-N-terminus	(+)HELIX,(+)TURN,(-)CCR4-Not_Not1_C-IPR007196,(-)HELIX,(-)MOTIF-LXXLL,(-)TURN		negative regulation of transcription from RNA polymerase II promoter // nuclear-transcribed mRNA catabolic process, deadenylation-dependent decay // nuclear-transcribed mRNA poly(A) tail shortening // transcription, DNA-dependent // gene expression // positive regulation of cytoplasmic mRNA processing body assembly // RNA metabolic process // mRNA metabolic process // negative regulation of estro…	-0.01315	alt-3'	E43-2|E43-3	TC16001154.hg	3
ENSG00000155508	0.23445		CNOT8	ENSG00000155508	CCR4-NOT transcription complex, subunit 8 [Source:HGNC Symbol;Acc:9207]	downregulated	ei-ex	2	2		E3.3,E7.2|E8.2	(+)AA:55(ENSP00000429810)->133(ENSP00000430215),(-)AA:128(ENSP00000429576)->186(ENSP00000429882),(-)alt-N-terminus,(-)truncated	(+)RNaseH-like_dom-IPR012337,(+)RNase_CAF1-IPR006941,(-)METAL-Divalent metal cation 1; catalytic,(-)RNaseH-like_dom-IPR012337,(-)RNase_CAF1-IPR006941	(indirect)RNaseH-like_dom-IPR012337, (indirect)RNase_CAF1-IPR006941	nuclear-transcribed mRNA catabolic process, deadenylation-dependent decay // nuclear-transcribed mRNA poly(A) tail shortening // transcription, DNA-dependent // regulation of transcription, DNA-dependent // positive regulation of cell proliferation // negative regulation of cell proliferation // gene expression // RNA metabolic process // mRNA metabolic process // gene silencing by miRNA // exonu…	0.305055	cassette-exon|cassetteExon, mutually-exclusive-exon	E3-3|E7-2	TC05000856.hg	5
ENSG00000119397	0.356984		CNTRL	ENSG00000119397	centriolin [Source:HGNC Symbol;Acc:1858]	upregulated	ei-ex	1	1	I41.3		(+)AA:126(ENST00000491018-PEP)->482(CAE45965.1),(+)alt-C-terminus,(+)alt-N-terminus	(+)SITE-Breakpoint for translocation to form CEP110-FGFR1	(indirect)COILED--UniProt, (indirect)REGION-Sufficient for interaction with HOOK2-UniProt, (indirect)REGION-Required for centrosome localization-UniProt	G2/M transition of mitotic cell cycle // mitotic cell cycle // cell division // nucleotide binding // protein binding // centrosome // cytosol	-1.13536			TC09000607.hg	2
ENSG00000173085	0.237517		COQ2	ENSG00000173085	coenzyme Q2 homolog, prenyltransferase (yeast) [Source:HGNC Symbol;Acc:25223]	upregulated	ei-ex	1	1	E10.1_84183824		(-)AA:213(ENSP00000426242)->421(ENSP00000310873),(-)alt-C-terminus,(-)alt-N-terminus,(-)nonsense_mediated_decay	(-)HB_polyprenyl-transferase-IPR006370,(-)TRANSMEM-Helical;,(-)UbiA_prenyltransferase-IPR000537		glycerol metabolic process // ubiquinone biosynthetic process // isoprenoid biosynthetic process // biosynthetic process // small molecule metabolic process // 4-hydroxybenzoate decaprenyltransferase activity // prenyltransferase activity // 4-hydroxybenzoate nonaprenyltransferase activity // mitochondrion // mitochondrial inner membrane // integral to membrane	0.564522	alt-C-term	E10-1	TC04001346.hg	3
ENSG00000007545	0.218086		CRAMP1L	ENSG00000007545	Crm, cramped-like (Drosophila) [Source:HGNC Symbol;Acc:14122]	downregulated	ei-ex	2	1		E17.2	(-)AA:42(ENST00000492778-PEP)->157(ENST00000466562-PEP),(-)alt-C-terminus,(-)alt-N-terminus,(-)retained_intron			DNA binding // chromatin binding // nucleus	0.412228	cassette-exon	E17-2	TC16002066.hg	3
ENSG00000205758	0.213246		CRYZL1	ENSG00000205758	crystallin, zeta (quinone reductase)-like 1 [Source:HGNC Symbol;Acc:2420]	upregulated	ei-ex	1	1	E1.1					quinone cofactor metabolic process // oxidation-reduction process // NADPH // zinc ion binding // oxidoreductase activity // transferase activity, transferring acyl groups other than amino-acyl groups // NADP binding // cytosol	-0.388757	alt-N-term	E1-1	TC21001057.hg	3
ENSG00000244306	0.218935		CTD-2314B22.3	ENSG00000244306		downregulated	ei-ex	1	1		E9.2_19894806					0.32387	alt-N-term|cassette-exon	E9-2	TC14000857.hg	3
ENSG00000162144	0.244181		CYB561A3	ENSG00000162144	cytochrome b561 family, member A3 [Source:HGNC Symbol;Acc:23014]	downregulated	ei-ex	1	1		E5.7	(+)AA:109(ENSP00000443756)->242(ENSP00000437390),(-)truncated	(+)Cyt_b561/ferric_Rdtase_TM-IPR006593,(+)Cyt_b561_euk-IPR004877,(+)DOMAIN-Cytochrome b561,(+)METAL-Iron (heme axial ligand),(+)TRANSMEM-Helical; Name=2;,(+)TRANSMEM-Helical; Name=3;,(+)TRANSMEM-Helical; Name=4;,(+)TRANSMEM-Helical; Name=5;,(+)TRANSMEM-Helical; Name=6;	(direct)Cyt_b561/ferric_Rdtase_TM-IPR006593, (direct)Cyt_b561_euk-IPR004877	electron transport chain // oxidoreductase activity // metal ion binding // lysosome // lysosomal membrane // integral to membrane // late endosome membrane	0.404533	cassette-exon	E5-7|E5-9	TC11001852.hg	3
ENSG00000161692	0.304343		DBF4B	ENSG00000161692	DBF4 homolog B (S. cerevisiae) [Source:HGNC Symbol;Acc:17883]	downregulated	ei-ex	2	1		E7.1	(+)truncated,(-)AA:157(ENSP00000431158)->615(ENSP00000323663),(-)microRNA-target(hsa-miR-19b:miRanda),(-)nonsense_mediated_decay	(-)ZN_FING-DBF4-type,(-)Znf_DBF-IPR006572		cell cycle // nucleic acid binding // zinc ion binding // nucleus // aggresome // intracellular membrane-bounded organelle	-0.234073	bleedingExon|cassette-exon|cassetteExon	E7-1	TC17000573.hg	5
ENSG00000104325	0.212653		DECR1	ENSG00000104325	2,4-dienoyl CoA reductase 1, mitochondrial [Source:HGNC Symbol;Acc:2753]	upregulated	ei-ex	1	1	E5.1		(+)truncated,(-)AA:41(ENSP00000431045)->335(ENSP00000220764),(-)nonsense_mediated_decay	(-)ACT_SITE-Proton acceptor,(-)BINDING-NADP,(-)BINDING-Substrate,(-)DH_sc/Rdtase_SDR-IPR002198,(-)Glc/ribitol_DH-IPR002347,(-)HELIX,(-)MOD_RES-N6-acetyllysine,(-)NP_BIND-NADP,(-)PKS_KR-IPR013968,(-)STRAND,(-)TRANSIT-Mitochondrion,(-)TURN	(indirect)TRANSIT-Mitochondrion-UniProt	Fatty Acid Biosynthesis:WP357 // Fatty Acid Beta Oxidation:WP143 // fatty acid beta-oxidation // metabolic process // cellular lipid metabolic process // small molecule metabolic process // protein homotetramerization // 2,4-dienoyl-CoA reductase (NADPH) activity // oxidoreductase activity // oxidoreductase activity, acting on NADH or NADPH // NADPH binding // nucleus // cytoplasm // mitochondrio…	-0.270528	mutually-exclusive-exon	E5-1	TC08000547.hg	3
ENSG00000100150	0.227056		DEPDC5	ENSG00000100150	DEP domain containing 5 [Source:HGNC Symbol;Acc:18423]	upregulated	ei-ex	1	1	E28.2		(+)AA:1572(ENSP00000383108)->1581(ENSP00000266091),(+)alt-coding			intracellular signal transduction // cytosol // perinuclear region of cytoplasm	0.0274548	alt-3'|altThreePrime	E28-2	TC22000232.hg	5
ENSG00000183628	0.233503		DGCR6	ENSG00000183628	DiGeorge syndrome critical region gene 6 [Source:HGNC Symbol;Acc:2846]	upregulated	ei-ex	1	1	E4.1		(+)AA:84(ENST00000436645-PEP)->144(ENSP00000466276),(+)alt-C-terminus,(+)alt-N-terminus,(+)nonsense_mediated_decay	(+)DGCR6-IPR010849,(-)DGCR6-IPR010849		cell adhesion // organ morphogenesis // molecular_function // proteinaceous extracellular matrix // nucleus	0.10454	alt-C-term	E4-1	TC22000033.hg	3
ENSG00000065357	0.274473		DGKA	ENSG00000065357	diacylglycerol kinase, alpha 80kDa [Source:HGNC Symbol;Acc:2849]	downregulated	ei-ex	1	1		E16.2	(+)truncated,(-)AA:247(ENSP00000385792)->735(ENSP00000450359),(-)microRNA-target(hsa-miR-183:miRanda),(-)nonsense_mediated_decay	(-)DOMAIN-DAGKc,(-)Diacylglycerol_kin_accessory-IPR000756,(-)Diacylglycerol_kinase_cat_dom-IPR001206,(-)MOD_RES-N6-acetyllysine,(-)Prot_Kinase_C-like_PE/DAG-bd-IPR002219,(-)ZN_FING-Phorbol-ester/DAG-type 1,(-)ZN_FING-Phorbol-ester/DAG-type 2	(direct)Prot_Kinase_C-like_PE/DAG-bd-IPR002219, (direct)ZN_FING-Phorbol-ester/DAG-type 1-UniProt	activation of protein kinase C activity by G-protein coupled receptor protein signaling pathway // blood coagulation // platelet activation // intracellular signal transduction // diacylglycerol kinase activity // calcium ion binding // ATP binding // phospholipid binding // kinase activity // metal ion binding // cytosol // plasma membrane	-0.154816	bleedingExon|cassetteExon|exon-region-exclusion|exon-region-exclusion|retainedIntron	E16-2	TC12000495.hg	5
ENSG00000117682	0.22898		DHDDS	ENSG00000117682	dehydrodolichyl diphosphate synthase [Source:HGNC Symbol;Acc:20603]	downregulated	ei-ex	1	1		E1.21	(-)AA:216(ENSP00000397584)->294(ENSP00000434219),(-)alt-C-terminus			protein glycosylation // protein binding // transferase activity, transferring alkyl or aryl (other than methyl) groups // endoplasmic reticulum membrane	0.690808	alt-5'	E1-16|E1-21	TC01000344.hg	3
ENSG00000176124	0.258248		DLEU1	ENSG00000176124	deleted in lymphocytic leukemia 1 (non-protein coding) [Source:HGNC Symbol;Acc:13747]	downregulated	ei-ex	2	2		E2.2|E3.1,E4.1|E2.2|E4.1|E2.1	(+)AA:44(ENST00000478860-PEP)->78(ENSP00000367422),(+)AA:47(ENST00000468522-PEP)->78(ENSP00000367422),(+)alt-C-terminus,(+)alt-N-terminus			protein binding	0.0844094	alt-5'|cassette-exon|cassette-exon|cassetteExon	E2-1|E2-2	TC13000205.hg	5
ENSG00000075711	0.268221		DLG1	ENSG00000075711	discs, large homolog 1 (Drosophila) [Source:HGNC Symbol;Acc:2900]	upregulated	ei-ex	2	2	E25.2_196802757	E22.1|E22.2	(+)AA:658(ENSP00000376186)->904(ENSP00000407531),(+)alt-C-terminus,(+)nonsense_mediated_decay	(+)DOMAIN-Guanylate kinase-like,(+)DOMAIN-SH3,(+)Guanylate_kin-IPR008144,(+)Guanylate_kin/L-typ_Ca_channel-IPR008145,(+)M-assoc_guanylate_kinase-IPR016313,(+)MOD_RES-Phosphoserine,(+)MOD_RES-Phosphothreonine,(+)P-loop_NTPase-IPR027417,(+)SH3_domain-IPR001452,(-)SH3_domain-IPR001452	(direct)SH3_domain-IPR001452, (direct)M-assoc_guanylate_kinase-IPR016313, (direct)DOMAIN-SH3-UniProt	BDNF signaling pathway:WP2380 // ureteric bud development // branching involved in ureteric bud morphogenesis // immunological synapse formation // endothelial cell proliferation // lens development in camera-type eye // T cell cytokine production // actin filament organization // mitotic cell cycle checkpoint // establishment or maintenance of cell polarity // synaptic transmission // axon guida…	-0.107798	bleedingExon|cassetteExon|mutually-exclusive-exon, cassetteExon|mutually-exclusive-exon	E22-1|E22-2|E25-2	TC03002174.hg	5
ENSG00000126787	0.217416		DLGAP5	ENSG00000126787	discs, large (Drosophila) homolog-associated protein 5 [Source:HGNC Symbol;Acc:16864]	upregulated	ei-ex	2	2	E19.1|E19.2	E21.1_55615207	(-)AA:842(ENSP00000378815)->846(ENSP00000247191),(-)alt-C-terminus	(-)MOD_RES-Phosphoserine,(-)MOD_RES-Phosphoserine; by AURKA,(-)MOD_RES-Phosphoserine; by CDK1		M phase of mitotic cell cycle // mitotic chromosome movement towards spindle pole // cell-cell signaling // cell proliferation // positive regulation of mitotic metaphase/anaphase transition // phosphoprotein phosphatase activity // protein binding // nucleus // cytoplasm // spindle pole centrosome	-0.732791		E19-1|E19-2|E21-1	TC14001155.hg	2
ENSG00000135164	0.214313		DMTF1	ENSG00000135164	cyclin D binding myb-like transcription factor 1 [Source:HGNC Symbol;Acc:14603]	downregulated	ei-ex	1	1		E7.1	(+)AA:672(ENSP00000412532)->760(ENSP00000332171),(+)alt-N-terminus,(-)microRNA-target(hsa-miR-224:miRanda,hsa-miR-27a:miRanda,hsa-miR-27b:RNAhybrid|miRanda)	(+)REGION-Interaction with CCND2,(+)REGION-Required for DNA-binding,(+)REGION-Required for transcriptional activation		miR-targeted genes in muscle cell - TarBase:WP2005 // miR-targeted genes in lymphocytes - TarBase:WP2004 // miR-targeted genes in epithelium - TarBase:WP2002 // transcription, DNA-dependent // regulation of transcription, DNA-dependent // cell cycle // DNA binding // chromatin binding // sequence-specific DNA binding transcription factor activity // nucleus // cytoplasm	-0.334745	cassette-exon|cassetteExon	E7-1	TC07000520.hg	5
ENSG00000114841	0.299177		DNAH1	ENSG00000114841	dynein, axonemal, heavy chain 1 [Source:HGNC Symbol;Acc:2940]	downregulated	ei-ex	1	1		E75.1	(-)AA:928(ENSP00000419071)->1054(ENST00000488988-PEP),(-)alt-C-terminus,(-)alt-N-terminus,(-)nonsense_mediated_decay,(-)retained_intron	(+)Dynein_heavy_dom-IPR004273,(-)COILED	(direct)Dynein_heavy_dom-IPR004273	ciliary or flagellar motility // microtubule-based movement // response to mechanical stimulus // microtubule motor activity // ATP binding // ATPase activity // axonemal dynein complex // microtubule // dynein complex // cilium axoneme	-0.854072	cassette-exon	E75-1	TC03000333.hg	3
ENSG00000087470	0.266267		DNM1L	ENSG00000087470	dynamin 1-like [Source:HGNC Symbol;Acc:2973]	downregulated	ei-ex	1	1		E21.1	(-)AA:712(ENSP00000350948)->738(ENSP00000370388),(-)alt-coding	(-)CROSSLNK-Glycyl lysine isopeptide (Lys-Gly) (interchain with G-Cter in SUMO),(-)MOD_RES-Phosphoserine	(direct)REGION-Interaction with GSK3B-UniProt, (direct)CROSSLNK-Glycyl lysine isopeptide (Lys-Gly) (interchain with G-Cter in SUMO)-UniProt, (direct)REGION-B domain-UniProt	Synaptic Vesicle Pathway:WP2267 // mitochondrial fission // dynamin polymerization involved in mitochondrial fission // apoptosis // cellular component disassembly involved in apoptosis // regulation of mitochondrion organization // peroxisome fission // mitochondrial fragmentation involved in apoptosis // positive regulation of protein secretion // protein homotetramerization // mitochondrion mo…	-0.285935	alt-3'|cassette-exon|cassetteExon	E21-1	TC12000298.hg	5
ENSG00000134516	0.227491		DOCK2	ENSG00000134516	dedicator of cytokinesis 2 [Source:HGNC Symbol;Acc:2988]	downregulated	ei-ex	1	1		E21.1	(-)AA:1322(ENSP00000429283)->1830(ENSP00000256935),(-)alt-N-terminus	(-)DOMAIN-DHR-1,(-)DOMAIN-SH3,(-)HELIX,(-)MOD_RES-N6-acetyllysine,(-)SH3_2-IPR011511,(-)SH3_domain-IPR001452,(-)STRAND	(direct)DOMAIN-DHR-1-UniProt	membrane raft polarization // establishment of T cell polarity // immunological synapse formation // myeloid dendritic cell activation involved in immune response // chemotaxis // cytoskeleton organization // small GTPase mediated signal transduction // viral reproduction // actin cytoskeleton organization // positive regulation of Rac GTPase activity // T cell proliferation // T cell activation …	-0.17108	cassette-exon|cassetteExon	E21-1	TC05000929.hg	5
ENSG00000104885	0.216927		DOT1L	ENSG00000104885	DOT1-like, histone H3 methyltransferase (S. cerevisiae) [Source:HGNC Symbol;Acc:24948]	upregulated	ei-ex	2	1	E32.2		(+)AA:1210(ENSP00000388276)->1537(ENSP00000381657),(+)alt-C-terminus,(+)alt-N-terminus,(+)microRNA-target(hsa-miR-491-3p:mirbase,hsa-miR-521:mirbase),(-)AA:1210(ENSP00000388276)->1537(ENSP00000381657),(-)alt-C-terminus,(-)alt-N-terminus	(+)BINDING-S-adenosyl-L-methionine,(+)DOMAIN-DOT1,(+)DOT1-IPR013110,(+)HELIX,(+)Histone_H3-K79_MeTrfase_met-IPR021169,(+)REGION-S-adenosyl-L-methionine binding,(+)STRAND,(-)BINDING-S-adenosyl-L-methionine,(-)DOMAIN-DOT1,(-)DOT1-IPR013110,(-)HELIX,(-)Histone_H3-K79_MeTrfase_met-IPR021169,(-)REGION-S-adenosyl-L-methionine binding,(-)STRAND	(direct)Histone_H3-K79_MeTrfase_met-IPR021169	Histone Modifications:WP2369 // histone lysine methylation // regulation of JAK-STAT cascade // regulation of transcription regulatory region DNA binding // DNA binding // protein binding // transcription factor binding // histone-lysine N-methyltransferase activity // histone methyltransferase activity // nucleus	-0.0219767	mutually-exclusive-exon	E32-2	TC19000049.hg	3
ENSG00000000419	0.224963		DPM1	ENSG00000000419	dolichyl-phosphate mannosyltransferase polypeptide 1, catalytic subunit [Source:HGNC Symbol;Acc:3005]	upregulated	ei-ex	2	2	E5.1	E7.1_49557762	(-)AA:221(ENSP00000394921)->287(ENSP00000360638),(-)alt-C-terminus	(+)Glyco_trans_2-IPR001173,(-)Glyco_trans_2-IPR001173	(direct)Glyco_trans_2-IPR001173	dolichol-linked oligosaccharide biosynthetic process // C-terminal protein lipidation // GPI anchor biosynthetic process // protein N-linked glycosylation via asparagine // dolichol metabolic process // GDP-mannose metabolic process // protein mannosylation // protein O-linked mannosylation // post-translational protein modification // cellular protein metabolic process // dolichyl-phosphate-mann…	-0.742926	mutually-exclusive-exon	E5-1|E7-1	TC20000940.hg	3
ENSG00000197635	0.30823		DPP4	ENSG00000197635	dipeptidyl-peptidase 4 [Source:HGNC Symbol;Acc:3009]	upregulated	ei-ex	2	2	E5.1,E7.1_162895547		(+)AA:40(ENST00000497461-PEP)->86(ENSP00000401359),(+)alt-C-terminus,(+)alt-N-terminus,(+)nonsense_mediated_decay	(+)HELIX,(+)STRAND,(+)TURN	(direct)Peptidase_S9B-IPR002469, (direct)TOPO_DOM-Extracellular-UniProt, (direct)TURN-UniProt	response to hypoxia // proteolysis // cell adhesion // positive regulation of cell proliferation // negative regulation of extracellular matrix disassembly // T cell costimulation // regulation of cell-cell adhesion mediated by integrin // T cell activation // endothelial cell migration // protease binding // aminopeptidase activity // serine-type endopeptidase activity // receptor binding // pro…	0.708989		E5-1|E7-1	TC02002478.hg	2
ENSG00000093144	0.234468		ECHDC1	ENSG00000093144	enoyl CoA hydratase domain containing 1 [Source:HGNC Symbol;Acc:21489]	upregulated	ei-ex	4	3	E11.5_127636057,E11.5_127636057|E7.5,E7.5		(+)AA:139(ENSP00000436703)->145(ENSP00000357272),(+)alt-C-terminus,(+)nonsense_mediated_decay,(+)truncated,(-)AA:70(ENSP00000436109)->226(ENSP00000404866)	(-)Crotonase_core_superfam-IPR001753	(direct)Crotonase_core_superfam-IPR001753	Fatty Acid Biosynthesis:WP357 // metabolic process // catalytic activity // methylmalonyl-CoA decarboxylase activity // carboxy-lyase activity // cytosol	0.497563	exon-region-exclusion|exon-region-exclusion	E11-3|E11-5|E7-5|E7-8	TC06002088.hg	3
ENSG00000204371	0.271507		EHMT2	ENSG00000204371	euchromatic histone-lysine N-methyltransferase 2 [Source:HGNC Symbol;Acc:14129]	upregulated	ei-ex	2	2	E10.1,E12.1_3185654		(-)AA:1176(ENSP00000364680)->1210(ENSP00000364687),(-)alt-coding			negative regulation of transcription from RNA polymerase II promoter // pachytene // regulation of DNA replication // DNA methylation // regulation of transcription from RNA polymerase II promoter // synaptonemal complex assembly // germ cell development // spermatid development // fertilization // DNA methylation on cytosine within a CG sequence // histone methylation // peptidyl-lysine dimethyl…	-0.00839667		E10-1|E12-1	TC06001550.hg	2
ENSG00000144895	0.437896		EIF2A	ENSG00000144895	eukaryotic translation initiation factor 2A, 65kDa [Source:HGNC Symbol;Acc:3254]	upregulated	ei-ex	1	1	E5.1|E4.1		(+)truncated,(-)AA:59(ENSP00000419456)->560(ENSP00000420537),(-)nonsense_mediated_decay	(-)COILED,(-)MOD_RES-Phosphoserine,(-)MOD_RES-Phosphothreonine,(-)REPEAT-WD 2,(-)REPEAT-WD 3,(-)TIF2A-IPR011387,(-)TIF_beta_prop-like-IPR013979	(direct)WD40_repeat_dom-IPR017986, (direct)REPEAT-WD 1-UniProt, (direct)TIF2A-IPR011387	translation // regulation of translation // protein phosphorylation // positive regulation of signal transduction // SREBP-mediated signaling pathway // ribosome assembly // tRNA binding // translation initiation factor activity // protein binding // ribosome binding // cytoplasm // eukaryotic translation initiation factor 2 complex	0.0553407	cassetteExon|mutually-exclusive-exon	E4-1	TC03000815.hg	5
ENSG00000106263	0.211093		EIF3B	ENSG00000106263	eukaryotic translation initiation factor 3, subunit B [Source:HGNC Symbol;Acc:3280]	upregulated	ei-ex	1	1	I8.2_2406608		(-)AA:50(ENST00000468250-PEP)->58(ENST00000463026-PEP),(-)alt-C-terminus,(-)alt-N-terminus,(-)retained_intron		(indirect)REPEAT-WD 3-UniProt	Translation Factors:WP107 // formation of translation preinitiation complex // translation // translational initiation // regulation of translational initiation // gene expression // cellular protein metabolic process // nucleotide binding // nucleic acid binding // RNA binding // translation initiation factor activity // protein binding // translation initiation factor binding // protein complex…	-0.484828	intron-retention		TC07000030.hg	3
ENSG00000114867	0.232267		EIF4G1	ENSG00000114867	eukaryotic translation initiation factor 4 gamma, 1 [Source:HGNC Symbol;Acc:3296]	upregulated	ei-ex	1	1	E3.1|E4.1		(+)AA:127(ENSP00000407244)->869(ENSP00000413159),(+)alt-C-terminus,(+)alt-N-terminus	(+)ARM-type_fold-IPR016024,(+)COMPBIAS-Poly-Ala,(+)COMPBIAS-Poly-Glu,(+)HELIX,(+)MIF4G-like_typ-3-IPR003890,(+)MOD_RES-Phosphothreonine,(+)REGION-EIF4E-binding,(+)REGION-PABPC1-binding,(+)SITE-Cleavage; by enterovirus/rhinovirus protease 2A,(+)SITE-Cleavage; by foot-and-mouth disease virus leader protease,(+)STRAND		Translation Factors:WP107 // nuclear-transcribed mRNA catabolic process, nonsense-mediated decay // nuclear-transcribed mRNA catabolic process, deadenylation-dependent decay // nuclear-transcribed mRNA poly(A) tail shortening // translation // translational initiation // regulation of translational initiation // cell death // insulin receptor signaling pathway // gene expression // RNA metabolic …	-0.125658	cassette-exon	E3-1	TC03001000.hg	3
ENSG00000134759	0.287968		ELP2	ENSG00000134759	elongator acetyltransferase complex subunit 2 [Source:HGNC Symbol;Acc:18248]	downregulated	ei-ex	4	4	E8.1	E7.1,E7.2,E7.2|E10.1	(-)AA:756(ENSP00000391202)->826(ENSP00000350967),(-)AA:800(ENSP00000257191)->826(ENSP00000350967),(-)AA:826(ENSP00000350967)->891(ENSP00000414851),(-)alt-coding,(-)microRNA-target(hsa-miR-1271:miRanda,hsa-miR-182:miRanda,hsa-miR-335:miRanda,hsa-miR-96:miRanda)	(+)REPEAT-WD 4,(+)WD40_repeat_dom-IPR017986,(-)REPEAT-WD 3,(-)REPEAT-WD 4,(-)REPEAT-WD 5,(-)WD40_repeat-IPR001680,(-)WD40_repeat_dom-IPR017986	(direct)REPEAT-WD 3-UniProt, (direct)WD40_repeat_dom-IPR017986, (direct)REPEAT-WD 4-UniProt	regulation of transcription from RNA polymerase II promoter // transcription elongation from RNA polymerase II promoter // regulation of JAK-STAT cascade // DNA binding // protein binding // protein kinase binding // nucleolus // cytoplasm // transcription elongation factor complex // DNA-directed RNA polymerase II, holoenzyme // Elongator holoenzyme complex	0.0409131	cassette-exon|cassetteExon, cassette-exon|cassetteExon|mutually-exclusive-exon, cassetteExon|mutually-exclusive-exon	E10-1|E7-1|E7-2|E7-2|E8-1	TC18000148.hg	5
ENSG00000173818	0.20271		ENDOV	ENSG00000173818	endonuclease V [Source:HGNC Symbol;Acc:26640]	upregulated	ei-ex	1	1	E5.1		(+)AA:237(ENSP00000431036)->282(ENSP00000429190),(+)alt-coding	(+)Endonuclease-V-IPR007581,(+)SITE-Interaction with target DNA,(-)Endonuclease-V-IPR007581		DNA repair // magnesium ion binding // endonuclease activity // endodeoxyribonuclease activity, producing 5'-phosphomonoesters	0.01356	cassette-exon	E5-1	TC17000919.hg	3
ENSG00000159023	0.342554		EPB41	ENSG00000159023	erythrocyte membrane protein band 4.1 (elliptocytosis 1, RH-linked) [Source:HGNC Symbol;Acc:3377]	downregulated	ei-ex	2	2		E17.1,E17.1|E18.1	(-)AA:50(ENST00000488277-PEP)->864(ENSP00000345259),(-)AA:831(ENSP00000348397)->864(ENSP00000345259),(-)alt-C-terminus,(-)alt-N-terminus,(-)alt-coding	(+)Band_41_protein-IPR021187,(-)Band_4.1_C-IPR008379,(-)Band_41_domain-IPR019749,(-)Band_41_fam-IPR019750,(-)Band_41_protein-IPR021187,(-)DOMAIN-FERM,(-)Ez/rad/moesin_like-IPR000798,(-)FERM-adjacent-IPR014847,(-)FERM_N-IPR018979,(-)FERM_PH-like_C-IPR018980,(-)FERM_central-IPR019748,(-)FERM_domain-IPR000299,(-)HELIX,(-)MOD_RES-Phosphoserine,(-)MOD_RES-Phosphothreonine; by CDK1,(-)MOD_RES-Phosphoty…	(direct)REGION-Spectrin-actin-binding-UniProt, (direct)Band_41_protein-IPR021187	blood circulation // actin cytoskeleton organization // cortical actin cytoskeleton organization // positive regulation of protein binding // actin binding // structural molecule activity // structural constituent of cytoskeleton // protein binding // calmodulin binding // 1-phosphatidylinositol binding // cytoskeletal protein binding // spectrin binding // nucleus // Golgi apparatus // cytoskele…	-0.149355	cassette-exon|cassetteExon	E17-1	TC01000394.hg	5
ENSG00000135999	0.20811		EPC2	ENSG00000135999	enhancer of polycomb homolog 2 (Drosophila) [Source:HGNC Symbol;Acc:24543]	upregulated	ei-ex	1	1	E6.1		(+)AA:807(ENSP00000258484)->807(BAG54249.1)			DNA repair // transcription, DNA-dependent // regulation of transcription, DNA-dependent // chromatin modification // Piccolo NuA4 histone acetyltransferase complex	-0.366477	alt-3'|cassette-exon	E6-1	TC02000926.hg	3
ENSG00000157036	0.273808		EXOG	ENSG00000157036	endo/exonuclease (5'-3'), endonuclease G-like [Source:HGNC Symbol;Acc:3347]	downregulated	ei-ex	3	1		E6.1	(+)AA:56(ENSP00000406101)->368(ENSP00000287675),(+)nonsense_mediated_decay,(+)truncated,(-)AA:107(ENSP00000394977)->368(ENSP00000287675),(-)nonsense_mediated_decay,(-)truncated	(+)ACT_SITE-Proton acceptor,(+)DNA/RNA_non-sp_Endonuclease-IPR001604,(+)Extracellular_endonuc_su_A-IPR020821,(+)HELIX,(+)METAL-Divalent metal cation; catalytic,(+)STRAND,(+)TURN,(-)ACT_SITE-Proton acceptor,(-)DNA/RNA_non-sp_Endonuclease-IPR001604,(-)Extracellular_endonuc_su_A-IPR020821,(-)HELIX,(-)METAL-Divalent metal cation; catalytic,(-)STRAND,(-)TURN	(indirect)DNA/RNA_non-sp_Endonuclease-IPR001604, (indirect)Extracellular_endonuc_su_A-IPR020821	biological_process // nucleic acid binding // endonuclease activity // hydrolase activity // metal ion binding // cellular_component // mitochondrion // mitochondrial inner membrane	0.00871167	cassetteExon|mutually-exclusive-exon	E6-1	TC03000193.hg	5
ENSG00000130713	0.33472		EXOSC2	ENSG00000130713	exosome component 2 [Source:HGNC Symbol;Acc:17097]	downregulated	ei-ex	1	1		E3.1|E2.2	(-)AA:137(ENST00000491115-PEP)->181(ENST00000430138-PEP),(-)alt-N-terminus	(-)HELIX,(-)MOD_RES-Phosphoserine,(-)STRAND,(-)TURN	(direct)STRAND-UniProt, (direct)NA-bd_OB-fold-IPR012340	nuclear-transcribed mRNA catabolic process, deadenylation-dependent decay // rRNA processing // gene expression // RNA metabolic process // mRNA metabolic process // positive regulation of cell growth // exonucleolytic nuclear-transcribed mRNA catabolic process involved in deadenylation-dependent decay // 3'-5'-exoribonuclease activity // RNA binding // exonuclease activity // protein binding // …	-0.09593	cassette-exon	E3-1	TC09000740.hg	3
ENSG00000120699	0.226546		EXOSC8	ENSG00000120699	exosome component 8 [Source:HGNC Symbol;Acc:17035]	downregulated	ei-ex	1	1		E8.2				nuclear-transcribed mRNA catabolic process, deadenylation-dependent decay // rRNA processing // biological_process // gene expression // RNA metabolic process // mRNA metabolic process // exonucleolytic nuclear-transcribed mRNA catabolic process involved in deadenylation-dependent decay // protein binding // AU-rich element binding // exosome (RNase complex) // nucleus // nucleolus // cytoplasm /…	-0.746659	exon-region-exclusion|exon-region-exclusion	E8-2	TC13000128.hg	3
ENSG00000189057	0.221599		FAM111B	ENSG00000189057	family with sequence similarity 111, member B [Source:HGNC Symbol;Acc:24200]	downregulated	ei-ex	1	1		E3.1	(-)AA:704(ENSP00000432875)->734(ENSP00000341565),(-)alt-N-terminus	(-)Trypsin-like_Pept_dom-IPR009003		catalytic activity	-0.236307	cassette-exon|cassetteExon	E3-1	TC11000482.hg	5
ENSG00000198420	0.235495		FAM115A	ENSG00000198420	family with sequence similarity 115, member A [Source:HGNC Symbol;Acc:22201]	downregulated	ei-ex	1	1		E11.1	(-)AA:919(ENSP00000348220)->921(ENSP00000419235),(-)alt-C-terminus				-0.653203	alt-5'|altFivePrime	E11-1|E11-2	TC07001975.hg	5
ENSG00000170074	0.313368		FAM153A	ENSG00000170074	family with sequence similarity 153, member A [Source:HGNC Symbol;Acc:29940]	upregulated	ei-ex	7	6	E4.4,E7.1_177190527	E11.1_177175716,E24.1_177161421|E14.1,E4.4,E6.1_177194197	(+)AA:24(ENSP00000425021)->37(ENST00000503136-PEP),(+)alt-C-terminus,(+)alt-N-terminus,(-)AA:112(ENST00000505683-PEP)->119(ENSP00000423766),(-)AA:18(ENST00000506229-PEP)->129(ENSP00000421623),(-)AA:18(ENST00000506229-PEP)->24(ENSP00000425021),(-)alt-C-terminus,(-)alt-N-terminus	(-)FAM153-IPR023249	(direct)FAM153-IPR023249		-0.889427	alt-C-term, alt-C-term|cassette-exon, alt-C-term|cassette-exon|alt-N-term|cassetteExon, alt-N-term, cassetteExon|mutually-exclusive-exon	E11-1|E24-1|E4-4|E6-1|E7-1	TC05002115.hg	5
ENSG00000182230	0.312819		FAM153B	ENSG00000182230	family with sequence similarity 153, member B [Source:HGNC Symbol;Acc:27323]	upregulated	ei-ex	6	5	E15.1|E16.1,E5.1,E8.3|E9.1,E9.1	E6.1	(+)AA:310(ENSP00000453424)->387(ENSP00000253490),(+)AA:36(ENST00000511680-PEP)->37(ENST00000514721-PEP),(+)alt-C-terminus,(+)alt-N-terminus,(+)retained_intron,(-)AA:112(ENST00000503533-PEP)->133(ENSP00000453011),(-)AA:18(ENST00000513073-PEP)->36(ENST00000511680-PEP),(-)AA:18(ENST00000513073-PEP)->47(ENST00000507409-PEP),(-)AA:36(ENST00000511680-PEP)->47(ENST00000507409-PEP),(-)alt-C-terminus,(-)a…	(+)FAM153-IPR023249,(-)FAM153-IPR023249	(indirect)FAM153-IPR023249		-0.883601	alt-C-term, alt-C-term|cassette-exon, alt-N-term, cassette-exon|cassetteExon	E15-1|E5-1|E6-1|E8-3|E9-1	TC05000988.hg	5
ENSG00000204677	0.312806		FAM153C	ENSG00000204677	family with sequence similarity 153, member C [Source:HGNC Symbol;Acc:33936]	upregulated	ei-ex	2	2	E5.1	E4.2|E6.1	(+)AA:36(ENST00000505582-PEP)->39(ENSP00000423403),(+)alt-C-terminus,(+)alt-N-terminus,(+)retained_intron,(-)AA:18(ENST00000505394-PEP)->36(ENST00000505582-PEP),(-)alt-C-terminus,(-)alt-N-terminus,(-)retained_intron	(+)FAM153-IPR023249,(-)FAM153-IPR023249			-1.49263	alt-C-term, alt-N-term	E22-1|E4-2|E5-1	TC05001030.hg	3
ENSG00000170264	0.216168		FAM161A	ENSG00000170264	family with sequence similarity 161, member A [Source:HGNC Symbol;Acc:25808]	downregulated	ei-ex	2	2		E5.1,E7.2_6206326	(-)AA:601(ENSP00000416861)->716(ENSP00000385158),(-)alt-C-terminus,(-)alt-N-terminus,(-)nonsense_mediated_decay	(-)COMPBIAS-Glu-rich,(-)UPF0564-IPR019579	(direct)COILED-UniProt, (direct)UPF0564-IPR019579	visual perception // cilium assembly // response to stimulus // protein binding // cytoplasm // centrosome // photoreceptor connecting cilium	-1.04719	cassette-exon|cassetteExon	E5-1|E7-1|E7-2	TC02001894.hg	5
ENSG00000152102	0.221468		FAM168B	ENSG00000152102	family with sequence similarity 168, member B [Source:HGNC Symbol;Acc:27016]	downregulated	ei-ex	1	1		E7.9_131805952	(-)AA:123(AAH66347.1)->195(ENSP00000374565),(-)alt-C-terminus	(-)TOPO_DOM-Cytoplasmic,(-)TOPO_DOM-Extracellular,(-)TRANSMEM-Helical;		plasma membrane // integral to membrane // axon // perinuclear region of cytoplasm	1.0645		E7-9	TC02002348.hg	2
ENSG00000148481	0.345402		FAM188A	ENSG00000148481	family with sequence similarity 188, member A [Source:HGNC Symbol;Acc:23578]	downregulated	ei-ex	2	2	E4.1	E5.1	(-)AA:164(ENSP00000389883)->445(ENSP00000277632),(-)AA:272(ENST00000477891-PEP)->445(ENSP00000277632),(-)alt-C-terminus,(-)alt-N-terminus	(-)MOD_RES-Phosphoserine		apoptosis // calcium ion binding // protein binding // nucleus // nuclear membrane	-0.0681237	cassette-exon|cassetteExon	E4-1|E5-1|E7-1	TC10001065.hg	5
ENSG00000160767	0.374621		FAM189B	ENSG00000160767	family with sequence similarity 189, member B [Source:HGNC Symbol;Acc:1233]	downregulated	ei-ex	2	2		E11.2_155217336|E6.6,E3.1_155224001	(+)AA:242(AAH08854.1)->287(ENST00000472550-PEP),(+)AA:650(ENSP00000357352)->668(ENSP00000354958),(+)alt-C-terminus,(+)alt-coding	(+)CD20-like-IPR007237,(+)TRANSMEM-Helical;,(-)CD20-like-IPR007237	(direct)TRANSMEM-Helical-UniProt, (direct)CD20-like-IPR007237	biological_process // protein binding // WW domain binding // integral to membrane	0.936778	alt-3', cassette-exon|cassetteExon	E11-1|E11-2|E3-1	TC01003309.hg	5
ENSG00000181544	0.235202		FANCB	ENSG00000181544	Fanconi anemia, complementation group B [Source:HGNC Symbol;Acc:3583]	upregulated	ei-ex	3	3	E1.3,E3.1_14883718	E1.3	(+)AA:859(ENSP00000381378)->859(ENSP00000326819),(-)AA:859(ENSP00000326819)->859(ENSP00000381378)			DNA repair // nucleoplasm // Fanconi anaemia nuclear complex	0.29002		E1-3|E3-1	TC0X000872.hg	2
ENSG00000077782	0.267231		FGFR1	ENSG00000077782	fibroblast growth factor receptor 1 [Source:HGNC Symbol;Acc:3688]	upregulated	ei-ex	3	3	E13.2_38285969	E13.2_38285969,E9.7	(+)AA:731(ENSP00000327229)->820(ENSP00000380280),(+)alt-coding	(+)DISULFID,(+)DOMAIN-Ig-like C2-type 1,(+)Ig-like_dom-IPR007110,(+)Ig_I-set-IPR013098,(+)Ig_sub-IPR003599,(+)Ig_sub2-IPR003598,(+)Immunoglobulin-IPR013151,(+)STRAND,(+)TURN,(+)Tyr_kinase_fibroblast_GF_rcpt-IPR016248,(-)Tyr_kinase_fibroblast_GF_rcpt-IPR016248	(direct)Tyr_kinase_fibroblast_GF_rcpt-IPR016248, (direct)SIGNAL-UniProt, (direct)TOPO_DOM-Extracellular-UniProt, (direct)Ig-like_dom-IPR007110	Signaling Pathways in Glioblastoma:WP2261 // Integrated Pancreatic Cancer Pathway:WP2377 // MAPK Signaling Pathway:WP382 // Regulation of Actin Cytoskeleton:WP51 // Neural Crest Differentiation:WP2064 // Endochondral Ossification:WP474 // negative regulation of transcription from RNA polymerase II promoter // MAPKKK cascade // skeletal system development // angiogenesis // ureteric bud developmen…	-0.100959	altPromoter|cassette-exon|exon-region-exclusion, cassette-exon	E13-2|E9-7	TC08001147.hg	5
ENSG00000088832	0.29904		FKBP1A	ENSG00000088832	FK506 binding protein 1A, 12kDa [Source:HGNC Symbol;Acc:3711]	upregulated	ei-ex	2	1	E5.1_13529|E1.6		(-)AA:79(ENST00000474726-PEP)->103(ENSP00000371143),(-)alt-N-terminus	(-)DOMAIN-PPIase FKBP-type,(-)PPIase_FKBP_dom-IPR001179,(-)STRAND	(direct)PPIase_FKBP_dom-IPR001179, (direct)DOMAIN-PPIase FKBP-type-UniProt	TOR Signaling:WP1471 // Calcium Regulation in the Cardiac Cell:WP536 // Integrated Pancreatic Cancer Pathway:WP2377 // Spinal Cord Injury:WP2431 // TGF Beta Signaling Pathway:WP366 // TGF Beta Signaling Pathway:WP560 // protein peptidyl-prolyl isomerization // heart morphogenesis // protein folding // 'de novo' protein folding // transforming growth factor beta receptor signaling pathway // SMAD …	0.729196	cassetteExon	E5-1	TC20001741.hg	4
ENSG00000079150	0.230826		FKBP7	ENSG00000079150	FK506 binding protein 7 [Source:HGNC Symbol;Acc:3723]	upregulated	ei-ex	1	1	E6.1_179330674|E1.7					protein peptidyl-prolyl isomerization // protein folding // peptidyl-proline modification // peptidyl-prolyl cis-trans isomerase activity // calcium ion binding // protein binding // FK506 binding // endoplasmic reticulum // endoplasmic reticulum lumen // membrane	0.122485	alt-N-term	E6-1	TC02002574.hg	3
ENSG00000162769	0.253231		FLVCR1	ENSG00000162769	feline leukemia virus subgroup C cellular receptor 1 [Source:HGNC Symbol;Acc:24682]	downregulated	ei-ex	1	1		E8.1	(-)AA:161(ENST00000483790-PEP)->354(ENSP00000414680),(-)alt-N-terminus	(-)MFS-IPR011701,(-)MFS_dom_general_subst_transpt-IPR016196,(-)TRANSMEM-Helical;	(direct)MFS_dom-IPR020846, (direct)MFS-IPR011701, (direct)TRANSMEM-Helical-UniProt, (direct)MFS_dom_general_subst_transpt-IPR016196	in utero embryonic development // transport // cellular iron ion homeostasis // multicellular organismal development // cell death // erythrocyte differentiation // limb morphogenesis // multicellular organism growth // embryonic digit morphogenesis // regulation of organ growth // spleen development // transmembrane transport // head morphogenesis // heme export // transporter activity // protei…	0.561062	cassette-exon	E8-1	TC01001781.hg	3
ENSG00000187239	0.432693		FNBP1	ENSG00000187239	formin binding protein 1 [Source:HGNC Symbol;Acc:17069]	upregulated	ei-ex	2	2	E9.2	E10.3_132686234	(+)AA:592(ENSP00000347907)->617(ENSP00000413625),(+)alt-C-terminus	(+)COMPBIAS-Poly-Pro,(+)MOD_RES-Phosphoserine,(+)REGION-Interaction with ARHGAP17, DAAM1, DIAPH1 and DIAPH2,(+)REGION-Interaction with DNM1 and DNM3,(+)REGION-Interaction with PDE6G,(+)REGION-Interaction with microtubules,(+)REGION-Required for interaction with TNKS,(+)REGION-Required for self-association and induction of membrane tubulation	(direct)REGION-Required for self-association and induction of membrane tubulation-UniProt, (direct)REGION-Interaction with microtubules-UniProt, (direct)HELIX-UniProt, (direct)REGION-F-BAR domain-UniProt	translation // endocytosis // signal transduction // RNA binding // structural constituent of ribosome // protein binding // lipid binding // identical protein binding // intracellular // lysosome // ribosome // cytoskeleton // plasma membrane // coated pit // cell cortex // cytoplasmic membrane-bounded vesicle	-0.274101	alt-3'|cassette-exon|altThreePrime|cassette-exon|cassetteExon	E10-2|E10-3|E9-2	TC09001656.hg	5
ENSG00000149531	0.372184		FRG1B	ENSG00000149531	FSHD region gene 1 family, member B [Source:HGNC Symbol;Acc:15792]	downregulated	ei-ex	4	4		E10.1,E10.1|E11.1,E12.1|E13.1,E13.1	(+)AA:75(ENSP00000436872)->163(BAB71366.1),(+)alt-C-terminus,(+)alt-N-terminus,(+)nonsense_mediated_decay,(-)AA:110(BC095491-PEP)->182(ENSP00000351249),(-)AA:163(BAB71366.1)->182(ENSP00000351249),(-)alt-C-terminus,(-)alt-N-terminus,(-)microRNA-target(hsa-miR-124:miRanda,hsa-miR-145:miRanda,hsa-miR-506:miRanda,hsa-miR-518d-3p:mirbase,hsa-miR-518e:mirbase,hsa-miR-579:mirbase)	(-)Actin_cross-linking-IPR008999,(-)FRG1-IPR010414	(direct)FRG1-IPR010414, (indirect)FRG1-IPR010414, (indirect)Actin_cross-linking-IPR008999		-0.094205	cassette-exon, cassette-exon|cassetteExon	E10-1|E11-1|E12-1|E13-1	TC20000178.hg	5
ENSG00000166225	0.229201		FRS2	ENSG00000166225	fibroblast growth factor receptor substrate 2 [Source:HGNC Symbol;Acc:16971]	upregulated	ei-ex	1	1	E7.1		(+)AA:508(ENSP00000447241)->508(ENSP00000299293)			BDNF signaling pathway:WP2380 // activation of MAPKK activity // activation of MAPK activity // gastrulation with mouth forming second // organ induction // ventricular septum development // transmembrane receptor protein tyrosine kinase signaling pathway // epidermal growth factor receptor signaling pathway // transmembrane receptor protein tyrosine phosphatase signaling pathway // G-protein cou…	-0.11808	cassette-exon|cassetteExon	E7-1	TC12000614.hg	5
ENSG00000001036	0.218092		FUCA2	ENSG00000001036	fucosidase, alpha-L- 2, plasma [Source:HGNC Symbol;Acc:4008]	downregulated	ei-ex	1	1		E5.1_143823275	(+)AA:165(ENSP00000356557)->467(ENSP00000002165),(-)truncated	(+)Glyco_hydro_29-IPR000933,(+)Glyco_hydro_29_sub-IPR016286,(+)Glycoside_hydrolase_SF-IPR017853,(+)SITE-May be important for catalysis,(-)Glyco_hydro_29-IPR000933,(-)Glyco_hydro_29_sub-IPR016286	(direct)Glyco_hydro_29_sub-IPR016286, (direct)Glyco_hydro_29-IPR000933, (direct)Glycoside_hydrolase_SF-IPR017853	carbohydrate metabolic process // fucose metabolic process // alpha-L-fucosidase activity // extracellular region	0.706701		E5-1	TC06002187.hg	2
ENSG00000089597	0.432004		GANAB	ENSG00000089597	glucosidase, alpha; neutral AB [Source:HGNC Symbol;Acc:4138]	downregulated	ei-ex	2	2		E6.3,E8.3_62401002	(+)AA:52(ENSP00000432181)->966(ENSP00000340466),(+)nonsense_mediated_decay,(-)truncated	(+)ACT_SITE,(+)ACT_SITE-Nucleophile,(+)ACT_SITE-Proton donor,(+)Gal_mutarotase_SF_dom-IPR011013,(+)Glyco_hydro_31-IPR000322,(+)Glycoside_hydrolase_SF-IPR017853	(direct)Gal_mutarotase_SF_dom-IPR011013	carbohydrate metabolic process // protein folding // protein N-linked glycosylation via asparagine // post-translational protein modification // cellular protein metabolic process // catalytic activity // hydrolase activity, hydrolyzing O-glycosyl compounds // protein binding // carbohydrate binding // glucan 1,3-alpha-glucosidase activity // endoplasmic reticulum lumen // Golgi apparatus // alph…	1.01811	alt-3'	E6-3|E6-4|E8-2|E8-3	TC11001873.hg	3
ENSG00000141013	0.209695		GAS8	ENSG00000141013	growth arrest-specific 8 [Source:HGNC Symbol;Acc:4166]	downregulated	ei-ex	2	1		E10.1	(+)truncated,(-)AA:35(ENSP00000454343)->478(ENSP00000268699),(-)nonsense_mediated_decay	(-)COILED,(-)REGION-Microtubule-binding,(-)REGION-Regulates microtubule-binding	(direct)REGION-Microtubule-binding-UniProt	negative regulation of cell proliferation // sperm motility // cellular protein localization // molecular_function // Rab GTPase binding // Golgi apparatus // microtubule // microtubule basal body // motile cilium	-0.2878	cassette-exon|cassetteExon	E10-1	TC16000711.hg	5
ENSG00000160766	0.271023		GBAP1	ENSG00000160766	glucosidase, beta, acid pseudogene 1 [Source:HGNC Symbol;Acc:4178]	upregulated	ei-ex	1	1	E5.8		(+)AA:320(ENST00000486869-PEP)->320(BC030240-PEP)				0.05375	cassetteExon|exon-region-exclusion|exon-region-exclusion	E5-8|E5-9	TC01006303.hg	5
ENSG00000131979	0.277411		GCH1	ENSG00000131979	GTP cyclohydrolase 1 [Source:HGNC Symbol;Acc:4193]	downregulated	ei-ex	3	3	E8.1_55309788	E3.1,E8.1_55309788|E3.1	(+)AA:73(ENST00000395521-PEP)->213(ENSP00000445246),(+)AA:73(ENST00000395521-PEP)->250(ENST00000254299-PEP),(+)alt-C-terminus,(+)alt-N-terminus	(+)GTP_CycHdrlase_I-IPR001474,(+)GTP_CycHdrlase_I/CN_OxRdtase-IPR020602,(+)HELIX,(+)METAL-Zinc,(+)MOD_RES-Phosphoserine,(+)STRAND,(+)TURN	(direct)GTP_CycHdrlase_I-IPR001474, (direct)STRAND-UniProt, (direct)GTP_CycHdrlase_I/CN_OxRdtase-IPR020602	GTP catabolic process // protein complex assembly // tetrahydrobiopterin biosynthetic process // nitric oxide biosynthetic process // induction of apoptosis // regulation of blood pressure // regulation of lung blood pressure // response to lipopolysaccharide // response to interferon-gamma // response to tumor necrosis factor // vasodilation // dopamine biosynthetic process // pteridine-containi…	0.867166	exon-region-exclusion|retainedIntron	E3-1|E8-1	TC14001152.hg	5
ENSG00000204120	0.212263		GIGYF2	ENSG00000204120	GRB10 interacting GYF protein 2 [Source:HGNC Symbol;Acc:11960]	upregulated	ei-ex	2	1	E2.1		(+)AA:28(ENST00000490229-PEP)->30(ENST00000483164-PEP),(+)alt-C-terminus,(+)alt-N-terminus,(-)AA:100(ENSP00000407161)->113(ENSP00000396958),(-)alt-C-terminus	(-)COMPBIAS-Poly-Gly		S phase of mitotic cell cycle // feeding behavior // cell death // adult locomotory behavior // post-embryonic development // negative regulation of translation // spinal cord motor neuron differentiation // mitotic cell cycle G1/S transition DNA damage checkpoint // multicellular organism growth // cellular protein metabolic process // insulin-like growth factor receptor signaling pathway // hom…	-0.388847	mutually-exclusive-exon	E2-1	TC02005011.hg	3
ENSG00000115419	0.226761		GLS	ENSG00000115419	glutaminase [Source:HGNC Symbol;Acc:4331]	downregulated	ei-ex	1	1		E7.1	(+)AA:114(ENSP00000388990)->156(ENST00000461965-PEP),(+)alt-C-terminus,(+)alt-N-terminus,(+)nonsense_mediated_decay,(+)retained_intron	(+)BINDING-Substrate,(+)HELIX,(+)STRAND,(+)TURN,(-)BINDING-Substrate,(-)Beta-lactam/transpept-like-IPR012338,(-)Glutaminase-IPR015868,(-)HELIX,(-)MOD_RES-N6-acetyllysine,(-)STRAND,(-)TURN	(direct)Beta-lactam/transpept-like-IPR012338, (direct)Glutaminase-IPR015868	regulation of respiratory gaseous exchange by neurological system process // glutamate biosynthetic process // glutamine metabolic process // glutamine catabolic process // synaptic transmission // neurotransmitter secretion // behavior // cellular amino acid biosynthetic process // glutamate secretion // cellular nitrogen compound metabolic process // small molecule metabolic process // protein …	1.14941	bleedingExon|cassette-exon, cassette-exon	E7-1|E8-2	TC02001122.hg	5
ENSG00000016864	0.308388		GLT8D1	ENSG00000016864	glycosyltransferase 8 domain containing 1 [Source:HGNC Symbol;Acc:24870]	upregulated	ei-ex	1	1	E11.3		(-)AA:23(ENSP00000418300)->249(ENST00000463827-PEP),(-)alt-C-terminus,(-)alt-N-terminus,(-)nonsense_mediated_decay		(direct)TOPO_DOM-Lumenal-UniProt, (direct)Glyco_trans_8-IPR002495	transferase activity, transferring glycosyl groups // mitochondrion // integral to membrane	0.372303	exon-region-exclusion|exon-region-exclusion	E11-3|E11-4	TC03001459.hg	3
ENSG00000163281	0.21661		GNPDA2	ENSG00000163281	glucosamine-6-phosphate deaminase 2 [Source:HGNC Symbol;Acc:21526]	downregulated	ei-ex	1	1		E1.5				carbohydrate metabolic process // N-acetylglucosamine metabolic process // glucosamine-6-phosphate deaminase activity // hydrolase activity // cytoplasm	0.616224		E1-5	TC04001157.hg	2
ENSG00000167110	0.320069		GOLGA2	ENSG00000167110	golgin A2 [Source:HGNC Symbol;Acc:4425]	upregulated	ei-ex	2	2	E19.3_131020802|E2.1	E7.1	(+)AA:237(ENSP00000411598)->473(ENSP00000409271),(+)alt-C-terminus,(+)alt-N-terminus,(-)AA:237(ENSP00000411598)->473(ENSP00000409271),(-)alt-C-terminus,(-)alt-N-terminus	(+)COMPBIAS-Poly-Lys,(+)CofA_tubulin-bd-IPR004226,(+)MOD_RES-Phosphoserine,(-)COMPBIAS-Poly-Lys,(-)CofA_tubulin-bd-IPR004226,(-)MOD_RES-Phosphoserine	(direct)COILED-UniProt	M phase of mitotic cell cycle // mitotic prophase // mitotic cell cycle // tubulin complex assembly // protein binding // unfolded protein binding // Golgi membrane // Golgi apparatus // cis-Golgi network // microtubule // Golgi cisterna membrane	-0.419258	altThreePrime, cassette-exon|cassetteExon	E19-2|E19-3|E7-1	TC09001628.hg	5
ENSG00000144674	0.287679		GOLGA4	ENSG00000144674	golgin A4 [Source:HGNC Symbol;Acc:4427]	upregulated	ei-ex	1	1	E5.1		(+)truncated,(-)AA:118(ENSP00000392907)->585(ENSP00000403009)	(-)tRNA-bd_arm-IPR010978		protein targeting to Golgi // vesicle-mediated transport // Golgi to plasma membrane protein transport // nucleotide binding // protein binding // GTPase binding // Golgi membrane // cytoplasm // Golgi apparatus // trans-Golgi network // membrane	-0.525672	cassette-exon	E5-1	TC03000178.hg	3
ENSG00000143457	0.268824		GOLPH3L	ENSG00000143457	golgi phosphoprotein 3-like [Source:HGNC Symbol;Acc:24882]	upregulated	ei-ex	2	2	E5.1_15063442	E2.1|E2.2	(-)AA:241(ENSP00000446070)->269(ENSP00000410476),(-)alt-C-terminus	(+)GPP34-IPR008628,(-)BINDING-PtdIns4P,(-)GPP34-IPR008628	(direct)GPP34-IPR008628	protein binding // lipid binding // Golgi cisterna membrane	0.355055		E2-1|E2-2|E5-1	TC01003208.hg	2
ENSG00000092978	0.219484		GPATCH2	ENSG00000092978	G patch domain containing 2 [Source:HGNC Symbol;Acc:25499]	downregulated	ei-ex	1	1		E7.1	(+)AA:68(ENST00000470014-PEP)->160(AK310304-PEP),(+)alt-C-terminus,(+)alt-N-terminus	(+)DOMAIN-G-patch,(+)G_patch_dom-IPR000467		negative regulation of phosphatase activity // nucleic acid binding	-0.400163	alt-N-term|alt-C-term	E7-1	TC01003823.hg	3
ENSG00000082701	0.286574		GSK3B	ENSG00000082701	glycogen synthase kinase 3 beta [Source:HGNC Symbol;Acc:4617]	downregulated	ei-ex	1	1		E13.1_119582468	(+)AA:420(ENSP00000264235)->433(ENSP00000324806),(+)alt-coding	(+)Kinase-like_dom-IPR011009,(+)Prot_kinase_cat_dom-IPR000719,(+)Ser/Thr_dual-sp_kinase_dom-IPR002290,(+)Tyr_kinase_cat_dom-IPR020635,(-)DOMAIN-Protein kinase,(-)HELIX,(-)Kinase-like_dom-IPR011009,(-)Prot_kinase_cat_dom-IPR000719,(-)Ser/Thr_dual-sp_kinase_dom-IPR002290,(-)Tyr_kinase_cat_dom-IPR020635	(direct)Ser/Thr_dual-sp_kinase_dom-IPR002290, (direct)DOMAIN-Protein kinase-UniProt, (direct)HELIX-UniProt, (direct)Prot_kinase_cat_dom-IPR000719, (direct)Kinase-like_dom-IPR011009, (direct)Tyr_kinase_cat_dom-IPR020635	IL-5 Signaling Pathway:WP127 // Wnt Signaling Pathway and Pluripotency:WP399 // Insulin Signaling:WP481 // BDNF signaling pathway:WP2380 // Glycogen Metabolism:WP500 // Regulation of Microtubule Cytoskeleton:WP2038 // Cardiac Progenitor Differentiation:WP2406 // Focal Adhesion:WP306 // Androgen receptor signaling pathway:WP138 // MicroRNAs in cardiomyocyte hypertrophy:WP1544 // IL17 signaling pat…	0.47016		E13-1	TC03001688.hg	2
ENSG00000170899	0.24364		GSTA4	ENSG00000170899	glutathione S-transferase alpha 4 [Source:HGNC Symbol;Acc:4629]	upregulated	ei-ex	1	1	E6.1_52849419		(-)AA:129(ENST00000477599-PEP)->222(ENSP00000360002),(-)alt-N-terminus	(-)BINDING-Glutathione,(-)DOMAIN-GST C-terminal,(-)DOMAIN-GST N-terminal,(-)GST_alpha-IPR003080,(-)Glutathione-S-Trfase_C-like-IPR010987,(-)Glutathione_S-Trfase_N-IPR004045,(-)HELIX,(-)REGION-Glutathione binding,(-)STRAND,(-)TURN,(-)Thioredoxin-like_fold-IPR012336	(direct)GST_alpha-IPR003080, (direct)HELIX-UniProt, (direct)DOMAIN-GST C-terminal-UniProt, (direct)Glutathione-S-Trfase_C-like-IPR010987	metapathway biotransformation:WP702 // glutathione metabolic process // xenobiotic metabolic process // small molecule metabolic process // glutathione transferase activity // protein binding // protein homodimerization activity // cytosol	-0.12081		E6-1	TC06001807.hg	2
ENSG00000105793	0.245182		GTPBP10	ENSG00000105793	GTP-binding protein 10 (putative) [Source:HGNC Symbol;Acc:25106]	downregulated	ei-ex	2	1		E10.1	(+)truncated,(-)AA:116(ENSP00000369398)->308(ENSP00000257659),(-)AA:308(ENSP00000257659)->387(ENSP00000222511),(-)alt-coding,(-)nonsense_mediated_decay	(+)GTP-bd_Obg/CgtA-IPR014100,(+)GTP1_OBG_dom-IPR006169,(+)GTP_binding_domain-IPR006073,(+)P-loop_NTPase-IPR027417,(-)EF_GTP-bd_dom-IPR000795,(-)Fe2_transport_prot_B_N-IPR011619,(-)GTP-bd_Obg/CgtA-IPR014100,(-)GTP1_OBG_dom-IPR006169,(-)GTP_binding_domain-IPR006073,(-)NP_BIND-GTP,(-)P-loop_NTPase-IPR027417	(direct)GTP1_OBG_dom-IPR006169, (direct)P-loop_NTPase-IPR027417, (direct)GTP_binding_domain-IPR006073, (direct)Fe2_transport_prot_B_N-IPR011619, (direct)GTP-bd_Obg/CgtA-IPR014100	ferrous iron transport // ribosome biogenesis // magnesium ion binding // GTPase activity // GTP binding // ferrous iron transmembrane transporter activity // chromosome // nucleolus // mitochondrion // integral to membrane	0.238432	cassetteExon|mutually-exclusive-exon	E10-1	TC07003334.hg	5
ENSG00000112855	0.225395		HARS2	ENSG00000112855	histidyl-tRNA synthetase 2, mitochondrial [Source:HGNC Symbol;Acc:4817]	downregulated	ei-ex	1	1		E6.5	(-)AA:334(ENSP00000407105)->392(ENSP00000415007),(-)alt-coding,(-)microRNA-target(hsa-miR-223:miRanda)	(+)HisRS/HisZ-IPR004516,(-)HisRS/HisZ-IPR004516	(direct)HisRS/HisZ-IPR004516, (direct)His-tRNA-ligase-IPR015807, (direct)aa-tRNA-synt_IIb_cons-dom-IPR002314, (direct)aa-tRNA-synth_II-IPR006195	translation // tRNA aminoacylation for protein translation // histidyl-tRNA aminoacylation // gene expression // nucleotide binding // aminoacyl-tRNA ligase activity // histidine-tRNA ligase activity // ATP binding // cytoplasm // mitochondrion // mitochondrial matrix	-0.03144	alt-5'|bleedingExon|cassetteExon	E6-5	TC05000732.hg	5
ENSG00000268498	0.200405		HDAC8	ENSG00000268498	histone deacetylase 8 [Source:HGNC Symbol;Acc:13315]	downregulated	ei-ex	1	1		E17.3_71549575	(+)AA:64(ENSP00000469617)->286(ENSP00000472595),(-)truncated	(+)BINDING-Substrate,(+)BINDING-Substrate; via carbonyl oxygen,(+)HELIX,(+)His_deacetylse-IPR000286,(+)His_deacetylse_1-IPR003084,(+)His_deacetylse_dom-IPR023801,(+)METAL-Divalent metal cation,(+)STRAND,(+)TURN	(direct)His_deacetylse_1-IPR003084	Integrated Pancreatic Cancer Pathway:WP2377 // Cell Cycle:WP179 // Neural Crest Differentiation:WP2064 // M phase of mitotic cell cycle // mitotic anaphase // negative regulation of transcription from RNA polymerase II promoter // mitotic prometaphase // mitotic cell cycle // chromatin assembly or disassembly // transcription, DNA-dependent // sister chromatid cohesion // chromatin modification /…	0.107467		E17-2|E17-3	TC0X001141.hg	2
ENSG00000071794	0.229337		HLTF	ENSG00000071794	helicase-like transcription factor [Source:HGNC Symbol;Acc:11099]	downregulated	ei-ex	1	1		E22.3_148759471	(-)AA:425(ENSP00000420106)->1009(ENSP00000308944),(-)alt-C-terminus,(-)alt-N-terminus	(+)P-loop_NTPase-IPR027417,(-)DNA_BIND,(-)DOMAIN-Helicase ATP-binding,(-)DOMAIN-Helicase C-terminal,(-)HELIX,(-)HIP116_Rad5p_N-IPR014905,(-)Helicase_ATP-bd-IPR014001,(-)Helicase_C-IPR001650,(-)MOD_RES-Phosphoserine,(-)MOD_RES-Phosphotyrosine; by JAK2,(-)NP_BIND-ATP,(-)P-loop_NTPase-IPR027417,(-)REGION-Interaction with SP1 and SP3,(-)SNF2_N-IPR000330,(-)STRAND,(-)TURN	(direct)P-loop_NTPase-IPR027417	ATP catabolic process // transcription, DNA-dependent // regulation of transcription, DNA-dependent // regulation of transcription from RNA polymerase II promoter // protein ubiquitination // chromatin modification // nucleic acid binding // DNA binding // helicase activity // protein binding // ATP binding // zinc ion binding // hydrolase activity, acting on acid anhydrides, in phosphorus-contai…	-0.643326		E22-1|E22-3	TC03001882.hg	2
ENSG00000101294	0.330369		HM13	ENSG00000101294	histocompatibility (minor) 13 [Source:HGNC Symbol;Acc:16435]	downregulated	ei-ex	2	2		E6.4|E7.3,E6.5|E7.3	(+)AA:109(ENST00000460225-PEP)->143(ENST00000498035-PEP),(+)alt-C-terminus,(+)alt-N-terminus,(+)retained_intron,(-)AA:109(ENST00000460225-PEP)->110(ENST00000487964-PEP),(-)alt-C-terminus,(-)alt-N-terminus	(+)TOPO_DOM-Cytoplasmic,(+)TOPO_DOM-Lumenal,(+)TRANSMEM-Helical;,(-)ACT_SITE,(-)MOTIF-PAL,(-)TOPO_DOM-Cytoplasmic,(-)TOPO_DOM-Lumenal,(-)TRANSMEM-Helical;		membrane protein proteolysis // aspartic-type endopeptidase activity // protein binding // peptidase activity // aspartic endopeptidase activity, intramembrane cleaving // protein homodimerization activity // endoplasmic reticulum // endoplasmic reticulum membrane // rough endoplasmic reticulum // plasma membrane // cell surface // integral to membrane // integral to cytosolic side of endoplasmic…	0.322859	alt-3'|cassette-exon	E7-3	TC20000191.hg	3
ENSG00000147421	0.208405		HMBOX1	ENSG00000147421	homeobox containing 1 [Source:HGNC Symbol;Acc:26137]	downregulated	ei-ex	1	1		I17.1_28911175				transcription, DNA-dependent // regulation of transcription, DNA-dependent // negative regulation of transcription, DNA-dependent // positive regulation of transcription, DNA-dependent // DNA binding // sequence-specific DNA binding transcription factor activity // sequence-specific DNA binding // nucleus // cytoplasm	0.0500158			TC08000225.hg	2
ENSG00000100099	0.226299		HPS4	ENSG00000100099	Hermansky-Pudlak syndrome 4 [Source:HGNC Symbol;Acc:15844]	upregulated	ei-ex	2	2	E9.1_26866904	E7.1	(+)AA:167(ENSP00000430291)->191(ENSP00000399705),(+)alt-C-terminus,(+)nonsense_mediated_decay			protein targeting // organelle organization // lysosome organization // blood coagulation // hemostasis // melanocyte differentiation // positive regulation of eye pigmentation // protein stabilization // protein binding // protein homodimerization activity // protein dimerization activity // cytoplasm // lysosome // membrane // cytoplasmic membrane-bounded vesicle // melanosome // platelet dense…	0.0647533	alt-3'|altThreePrime	E7-1|E9-1	TC22000608.hg	5
ENSG00000102878	0.249162		HSF4	ENSG00000102878	heat shock transcription factor 4 [Source:HGNC Symbol;Acc:5227]	downregulated	ei-ex	2	1		E7.1	(-)AA:115(ENST00000520833-PEP)->224(ENSP00000428077),(-)AA:46(ENST00000517680-PEP)->78(ENST00000522027-PEP),(-)alt-C-terminus,(-)alt-N-terminus,(-)retained_intron	(+)CROSSLNK-Glycyl lysine isopeptide (Lys-Gly) (interchain with G-Cter in SUMO),(+)MOD_RES-Phosphoserine,(+)REGION-Hydrophobic repeat HR-A/B,(+)REGION-Interactions with DUSP26, MAPK1 and MAPK2		negative regulation of transcription from RNA polymerase II promoter // eye development // transcription, DNA-dependent // regulation of transcription, DNA-dependent // response to stress // positive regulation of cell proliferation // histone H3-K9 demethylation // camera-type eye development // positive regulation of cell differentiation // positive regulation of transcription from RNA polymera…	-0.589208	cassette-exon	E7-1	TC16002079.hg	3
ENSG00000267816	0.267855		IDS	ENSG00000267816	iduronate 2-sulfatase [Source:HGNC Symbol;Acc:5389]	downregulated	ei-ex	1	1		I14.8	(-)AA:132(ENST00000594252-PEP)->144(ENST00000601128-PEP),(-)alt-C-terminus	(+)Phosphodiest/P_Trfase-IPR002591	(indirect)Sulfatase-IPR000917, (indirect)Alkaline_phosphatase_core-IPR017850	carbohydrate metabolic process // glycosaminoglycan catabolic process // metabolic process // glycosaminoglycan metabolic process // chondroitin sulfate metabolic process // chondroitin sulfate catabolic process // small molecule metabolic process // catalytic activity // iduronate-2-sulfatase activity // sulfuric ester hydrolase activity // metal ion binding // lysosomal lumen	0.86348			TC0X002343.hg	2
ENSG00000123411	0.223548		IKZF4	ENSG00000123411	IKAROS family zinc finger 4 (Eos) [Source:HGNC Symbol;Acc:13179]	upregulated	ei-ex	1	1	E8.1		(-)AA:169(ENST00000551701-PEP)->206(ENST00000548601-PEP),(-)alt-C-terminus,(-)alt-N-terminus	(-)ZN_FING-C2H2-type 3,(-)Znf_C2H2-IPR007087,(-)Znf_C2H2-like-IPR015880		transcription, DNA-dependent // negative regulation of transcription, DNA-dependent // nucleic acid binding // DNA binding // sequence-specific DNA binding transcription factor activity // protein binding // zinc ion binding // protein homodimerization activity // protein heterodimerization activity // nucleus	0.699611	cassette-exon|cassetteExon	E8-1	TC12000499.hg	5
ENSG00000115604	0.277152		IL18R1	ENSG00000115604	interleukin 18 receptor 1 [Source:HGNC Symbol;Acc:5988]	upregulated	ei-ex	2	1	E4.1		(+)AA:385(BC143405-PEP)->540(AAI43404.1),(+)alt-N-terminus	(+)DISULFID,(+)DOMAIN-Ig-like C2-type 1,(+)DOMAIN-Ig-like C2-type 2,(+)IL1_rcpt_I/II-IPR004074,(+)SIGNAL	(direct)IL1_rcpt_I/II-IPR004074, (direct)TOPO_DOM-Extracellular-UniProt, (direct)DOMAIN-Ig-like C2-type 1-UniProt	immune response // signal transduction // natural killer cell activation // positive regulation of interferon-gamma production // interleukin-18-mediated signaling pathway // positive regulation of NF-kappaB import into nucleus // T-helper 1 cell differentiation // receptor activity // interleukin-1 receptor activity // protein binding // interleukin-18 receptor activity // plasma membrane // int…	0.418855	cassette-exon|cassetteExon	E4-1	TC02004995.hg	5
ENSG00000162594	0.215711		IL23R	ENSG00000162594	interleukin 23 receptor [Source:HGNC Symbol;Acc:19100]	upregulated	ei-ex	1	1	E12.1				(indirect)TOPO_DOM-Cytoplasmic-UniProt	positive regulation of T cell mediated cytotoxicity // positive regulation of defense response to virus by host // positive regulation of T-helper 1 type immune response // inflammatory response // positive regulation of activation of JAK2 kinase activity // response to lipopolysaccharide // negative regulation of interleukin-10 production // positive regulation of granulocyte macrophage colony-s…	-0.13995	cassetteExon|mutually-exclusive-exon	E12-1	TC01000739.hg	5
ENSG00000184903	0.206152		IMMP2L	ENSG00000184903	IMP2 inner mitochondrial membrane peptidase-like (S. cerevisiae) [Source:HGNC Symbol;Acc:14598]	upregulated	ei-ex	2	2	E13.1_110305084	E10.1	(-)AA:63(ENST00000489381-PEP)->175(ENSP00000405473),(-)alt-C-terminus,(-)alt-N-terminus	(-)ACT_SITE,(-)Pept_S26A_signal_pept_1-IPR000223,(-)Peptidase_S24_S26-IPR019759,(-)Peptidase_S24_S26A/B/C-IPR015927,(-)TRANSMEM-Helical;	(indirect)Peptidase_S24_S26A/B/C-IPR015927, (direct)Pept_S26A_signal_pept_1-IPR000223, (direct)Peptidase_S24_S26-IPR019759, (direct)Peptidase_S24_S26A/B/C-IPR015927	ovarian follicle development // proteolysis // protein processing involved in protein targeting to mitochondrion // spermatogenesis // ovulation // peptidase activity // serine-type peptidase activity // nucleus // mitochondrion // membrane // integral to membrane // mitochondrial inner membrane peptidase complex	-0.199933	alt-C-term, alt-C-term|mutually-exclusive-exon	E10-1|E13-1	TC07001758.hg	3
ENSG00000153391	0.234283		INO80C	ENSG00000153391	INO80 complex subunit C [Source:HGNC Symbol;Acc:26994]	upregulated	ei-ex	4	3	E5.1_33060543	E1.8,E2.1	(-)AA:137(ENSP00000473165)->192(AAH39404.1),(-)alt-C-terminus,(-)alt-N-terminus	(-)CROSSLNK-Glycyl lysine isopeptide (Lys-Gly) (interchain with G-Cter in ubiquitin),(-)YL1_C-IPR013272	(indirect)YL1_C-IPR013272, (direct)YL1_C-IPR013272	DNA repair // DNA recombination // transcription, DNA-dependent // regulation of transcription, DNA-dependent // biological_process // molecular_function // nucleolus // Ino80 complex // MLL1 complex	-0.0334282	cassette-exon	E1-8|E1-9|E2-1|E5-1	TC18000455.hg	3
ENSG00000198825	0.283371		INPP5F	ENSG00000198825	inositol polyphosphate-5-phosphatase F [Source:HGNC Symbol;Acc:17054]	upregulated	ei-ex	2	2	E16.2,E16.3		(+)AA:375(ENSP00000358079)->1132(ENSP00000354519),(-)truncated	(+)DOMAIN-SAC,(+)Inositol_phosphatase-IPR022158,(+)MOD_RES-Phosphoserine,(+)Syja_N-IPR002013,(-)Syja_N-IPR002013	(direct)Inositol_phosphatase-IPR022158	cardiac muscle hypertrophy in response to stress // phosphatidylinositol catabolic process // phosphatidylinositol-mediated signaling // phosphoric ester hydrolase activity	0.107639	alt-5'|cassette-exon, alt-N-term	E16-2|E16-3	TC10000869.hg	3
ENSG00000104613	0.201038		INTS10	ENSG00000104613	integrator complex subunit 10 [Source:HGNC Symbol;Acc:25548]	downregulated	ei-ex	1	1		E16.1	(+)AA:29(ENSP00000428300)->103(ENSP00000429117),(+)alt-C-terminus,(+)alt-N-terminus,(+)nonsense_mediated_decay			snRNA processing // protein binding // nucleus // cytoplasm // integrator complex	-0.312072	cassette-exon	E16-1	TC08000148.hg	3
ENSG00000173226	0.255897		IQCB1	ENSG00000173226	IQ motif containing B1 [Source:HGNC Symbol;Acc:28949]	upregulated	ei-ex	1	1	E5.1		(-)AA:84(ENSP00000417832)->143(ENSP00000419168),(-)alt-C-terminus	(-)DOMAIN-IQ 1,(-)IQ_motif_EF-hand-BS-IPR000048,(-)P-loop_NTPase-IPR027417		cilium assembly // photoreceptor cell maintenance // maintenance of organ identity // binding // protein binding // calmodulin binding // photoreceptor outer segment // cytoplasm // centrosome // photoreceptor connecting cilium	-0.835588		E5-1	TC03001699.hg	2
ENSG00000164171	0.256366		ITGA2	ENSG00000164171	integrin, alpha 2 (CD49B, alpha 2 subunit of VLA-2 receptor) [Source:HGNC Symbol;Acc:6137]	downregulated	ei-ex	1	1		E24.1	(-)AA:942(ENSP00000422145)->1052(BC143511-PEP),(-)alt-C-terminus,(-)nonsense_mediated_decay	(-)DISULFID,(-)Integrin_alpha-2-IPR013649	(direct)TOPO_DOM-Extracellular-UniProt, (direct)Integrin_alpha-2-IPR013649	Arrhythmogenic right ventricular cardiomyopathy (ARVC):KEGG-hsa05412:WP2118 // miR-targeted genes in muscle cell - TarBase:WP2005 // Focal Adhesion:WP306 // Integrin-mediated Cell Adhesion:WP185 // Interleukin-11 Signaling Pathway:WP2332 // miR-targeted genes in lymphocytes - TarBase:WP2004 // cell adhesion // cell-matrix adhesion // integrin-mediated signaling pathway // axon guidance // blood c…	0.0283553	cassette-exon|cassetteExon	E24-1	TC05000218.hg	5
ENSG00000135424	0.228358		ITGA7	ENSG00000135424	integrin, alpha 7 [Source:HGNC Symbol;Acc:6143]	downregulated	ei-ex	1	1		E5.1_56095216|E2.8	(+)AA:1044(ENSP00000393844)->1141(ENSP00000452120),(+)alt-N-terminus	(+)DISULFID,(+)Int_alpha_beta-p-IPR013519,(+)REPEAT-FG-GAP 1,(+)REPEAT-FG-GAP 2,(+)SIGNAL	(indirect)REPEAT-FG-GAP 2-UniProt, (indirect)TOPO_DOM-Extracellular-UniProt	Arrhythmogenic right ventricular cardiomyopathy (ARVC):KEGG-hsa05412:WP2118 // Focal Adhesion:WP306 // Integrin-mediated Cell Adhesion:WP185 // cell adhesion // cell-matrix adhesion // integrin-mediated signaling pathway // muscle organ development // skeletal muscle tissue development // regulation of cell shape // cell migration // blood vessel morphogenesis // integrin binding // protein bindi…	-0.0654839	cassette-exon|cassetteExon	E5-1	TC12001583.hg	5
ENSG00000147166	0.213787		ITGB1BP2	ENSG00000147166	integrin beta 1 binding protein (melusin) 2 [Source:HGNC Symbol;Acc:6154]	downregulated	ei-ex	1	1		E2.1|E3.1	(-)AA:106(ENST00000483897-PEP)->329(ENSP00000440289),(-)alt-C-terminus,(-)alt-N-terminus	(-)CHORD-IPR007051,(-)COMPBIAS-Asp/Glu-rich (acidic),(-)CS-like_domain-IPR007052,(-)CS_domain-IPR017447,(-)DOMAIN-CS,(-)HSP20-like_chaperone-IPR008978,(-)METAL-Zinc 1,(-)METAL-Zinc 2,(-)MOTIF-SH2-binding,(-)MOTIF-SH3-binding	(direct)DOMAIN-CHORD 1-UniProt, (direct)COMPBIAS-Cys-rich-UniProt, (direct)CHORD-IPR007051	signal transduction // muscle organ development // integrin binding // calcium ion binding // zinc ion binding // SH3 domain binding // Z disc	0.00752333	cassette-exon	E2-1	TC0X000386.hg	3
ENSG00000108773	0.229859		KAT2A	ENSG00000108773	K(lysine) acetyltransferase 2A [Source:HGNC Symbol;Acc:4201]	upregulated	ei-ex	1	1	E6.1		(+)AA:276(ENSP00000468390)->837(BAI45999.1),(+)alt-C-terminus,(+)alt-N-terminus,(+)nonsense_mediated_decay	(+)Acyl_CoA_acyltransferase-IPR016181,(+)Bromodomain-IPR001487,(+)DOMAIN-Bromo,(+)DOMAIN-N-acetyltransferase,(+)GNAT_dom-IPR000182,(+)HELIX,(+)Hist_acetylase_PCAF-IPR016376,(+)STRAND,(+)TURN	(direct)Hist_acetylase_PCAF-IPR016376	Notch Signaling Pathway:WP268 // in utero embryonic development // somitogenesis // neural tube closure // chromatin remodeling // regulation of transcription, DNA-dependent // regulation of transcription from RNA polymerase II promoter // transcription from RNA polymerase II promoter // nervous system development // cell proliferation // histone acetylation // histone deubiquitination // virus-h…	-0.0274608	alt-5'	E6-1|E6-2	TC17001524.hg	3
ENSG00000069424	0.278836		KCNAB2	ENSG00000069424	potassium voltage-gated channel, shaker-related subfamily, beta member 2 [Source:HGNC Symbol;Acc:6229]	upregulated	ei-ex	3	1	E12.1		(+)AA:353(ENSP00000318772)->367(ENSP00000340824),(+)alt-coding,(-)AA:353(ENSP00000318772)->367(ENSP00000340824),(-)alt-coding	(+)K_chnl_volt-dep_bsu_KCNAB-IPR005983,(+)K_chnl_volt-dep_bsu_KCNAB2-IPR005401,(+)MOD_RES-Phosphotyrosine,(+)NADP_OxRdtase_dom-IPR023210,(+)STRAND,(-)K_chnl_volt-dep_bsu_KCNAB-IPR005983,(-)K_chnl_volt-dep_bsu_KCNAB2-IPR005401,(-)MOD_RES-Phosphotyrosine,(-)NADP_OxRdtase_dom-IPR023210,(-)STRAND	(direct)NADP_OxRdtase_dom-IPR023210, (direct)STRAND-UniProt, (direct)K_chnl_volt-dep_bsu_KCNAB2-IPR005401, (direct)K_chnl_volt-dep_bsu_KCNAB-IPR005983	metapathway biotransformation:WP702 // potassium ion transport // synaptic transmission // protein heterooligomerization // voltage-gated potassium channel activity // protein binding // potassium channel regulator activity // cytoplasm // plasma membrane // integral to membrane // juxtaparanode region of axon	-0.050195	cassette-exon|cassetteExon	E12-1	TC01000084.hg	5
ENSG00000164808	0.292377		KIAA0146	ENSG00000164808	KIAA0146 [Source:HGNC Symbol;Acc:28971]	upregulated	ei-ex	2	2	E13.1|E14.1,E33.1		(-)AA:32(ENST00000524157-PEP)->143(ENST00000521918-PEP),(-)AA:93(ENSP00000427878)->95(ENSP00000429448),(-)alt-C-terminus,(-)alt-N-terminus				-0.35005	alt-N-term, cassette-exon	E14-1|E33-1	TC08000343.hg	3
ENSG00000116299	0.212993		KIAA1324	ENSG00000116299	KIAA1324 [Source:HGNC Symbol;Acc:29618]	downregulated	ei-ex	1	1		E8.1	(-)AA:901(ENSP00000393964)->1013(ENSP00000358955),(-)alt-C-terminus	(+)Growth_fac_rcpt_N_dom-IPR009030,(-)DISULFID,(-)Growth_fac_rcpt_N_dom-IPR009030,(-)TOPO_DOM-Cytoplasmic,(-)TOPO_DOM-Extracellular	(direct)DISULFID-UniProt, (direct)TOPO_DOM-Extracellular-UniProt, (direct)Growth_fac_rcpt_N_dom-IPR009030	macroautophagy // regulation of apoptosis // positive regulation of vacuole organization // molecular_function // lysosome // late endosome // trans-Golgi network // integral to plasma membrane	0.157843	alt-N-term|mutually-exclusive-exon|cassetteExon	E8-1	TC01000939.hg	5
ENSG00000150477	0.262335		KIAA1328	ENSG00000150477	KIAA1328 [Source:HGNC Symbol;Acc:29248]	upregulated	ei-ex	1	1	I7.2_34475731		(-)AA:81(ENSP00000467248)->279(ENSP00000390515),(-)alt-C-terminus,(-)alt-N-terminus,(-)nonsense_mediated_decay	(-)COILED	(indirect)COILED--UniProt		-0.397435			TC18000151.hg	2
ENSG00000107036	0.305003		KIAA1432	ENSG00000107036	KIAA1432 [Source:HGNC Symbol;Acc:17686]	upregulated	ei-ex	4	2	E14.1	E15.1	(+)AA:1307(ENSP00000398823)->1344(ENSP00000402240),(+)AA:554(ENST00000276898-PEP)->1307(ENSP00000398823),(+)alt-C-terminus,(+)alt-N-terminus,(+)alt-coding,(+)retained_intron,(-)AA:1307(ENSP00000398823)->1344(ENSP00000402240),(-)alt-coding	(+)MOD_RES-Phosphoserine,(+)MOD_RES-Phosphothreonine,(+)REPEAT-WD 2,(+)TRANSMEM-Helical;,(+)WD40_repeat_dom-IPR017986		protein binding // integral to membrane	0.395066	cassette-exon|cassetteExon, cassetteExon|mutually-exclusive-exon	E14-1|E15-1	TC09000040.hg	5
ENSG00000137807	0.226978		KIF23	ENSG00000137807	kinesin family member 23 [Source:HGNC Symbol;Acc:6392]	downregulated	ei-ex	2	2		E20.3,E5.1	(+)truncated,(-)AA:109(ENSP00000453629)->960(ENSP00000260363),(-)AA:952(ENSP00000378790)->960(ENSP00000260363),(-)alt-coding,(-)microRNA-target(hsa-miR-125a-5p:miRanda,hsa-miR-125b:miRanda,hsa-miR-203:miRanda,hsa-miR-338-3p:miRanda,hsa-miR-504:miRanda),(-)nonsense_mediated_decay	(+)Kinesin_motor_dom-IPR001752,(-)COILED,(-)DOMAIN-Kinesin-motor,(-)HELIX,(-)Kinesin_motor_dom-IPR001752,(-)MOD_RES-Phosphoserine,(-)MOD_RES-Phosphothreonine,(-)NP_BIND-ATP,(-)P-loop_NTPase-IPR027417,(-)STRAND	(direct)P-loop_NTPase-IPR027417, (direct)DOMAIN-Kinesin-motor-UniProt, (direct)Kinesin_motor_dom-IPR001752	mitotic spindle elongation // M phase of mitotic cell cycle // mitotic cell cycle // cytokinesis // microtubule-based movement // blood coagulation // antigen processing and presentation of exogenous peptide antigen via MHC class II // positive regulation of cytokinesis // spindle midzone assembly involved in mitosis // microtubule motor activity // protein binding // ATP binding // microtubule b…	-0.629951	alt-3'|cassette-exon|cassetteExon, cassette-exon|cassetteExon	E20-3|E5-1	TC15000638.hg	5
ENSG00000165115	0.265787		KIF27	ENSG00000165115	kinesin family member 27 [Source:HGNC Symbol;Acc:18632]	upregulated	ei-ex	1	1	E12.1		(-)AA:1304(ENSP00000333928)->1401(ENSP00000297814),(-)alt-coding	(-)COILED	(direct)COILED-UniProt	epithelial cilium movement // microtubule-based movement // ventricular system development // cilium assembly // microtubule motor activity // protein binding // ATP binding // microtubule binding // cytoplasm // microtubule // microtubule associated complex // cilium	-0.87086	cassette-exon|cassetteExon	E12-1|E12-2	TC09001282.hg	5
ENSG00000109466	0.225476		KLHL2	ENSG00000109466	kelch-like family member 2 [Source:HGNC Symbol;Acc:6353]	downregulated	ei-ex	1	1		E8.3	(-)AA:496(ENSP00000408974)->593(ENSP00000226725),(-)alt-N-terminus	(+)BTB/POZ_fold-IPR011333,(-)BTB/POZ-like-IPR000210,(-)BTB/POZ_fold-IPR011333,(-)BTB_POZ-IPR013069,(-)DOMAIN-BTB,(-)Kelch-like_gigaxonin-IPR017096	(direct)BTB_POZ-IPR013069, (direct)BTB/POZ_fold-IPR011333, (direct)BTB/POZ-like-IPR000210, (direct)Kelch-like_gigaxonin-IPR017096	protein ubiquitination // actin binding // protein binding // ruffle // cytoplasm // cytosol // actin cytoskeleton // lamellipodium // Cul3-RING ubiquitin ligase complex	-0.0321598	alt-N-term|mutually-exclusive-exon	E8-3	TC04000826.hg	3
ENSG00000001631	0.211436		KRIT1	ENSG00000001631	KRIT1, ankyrin repeat containing [Source:HGNC Symbol;Acc:1573]	upregulated	ei-ex	1	1	E4.2_91871467		(+)AA:38(ENSP00000414694)->65(ENSP00000396352),(+)alt-C-terminus	(+)STRAND		Hypothetical Network for Drug Addiction:WP666 // angiogenesis // negative regulation of endothelial cell proliferation // small GTPase mediated signal transduction // negative regulation of endothelial cell migration // negative regulation of angiogenesis // positive regulation of protein binding // cell redox homeostasis // regulation of establishment of cell polarity // negative regulation of e…	-0.416403	alt-3'	E4-1|E4-2	TC07001597.hg	3
ENSG00000126790	0.262819		L3HYPDH	ENSG00000126790	L-3-hydroxyproline dehydratase (trans-) [Source:HGNC Symbol;Acc:20488]	upregulated	ei-ex	2	1	E1.3		(+)AA:142(ENSP00000423874)->354(ENSP00000247194),(+)AA:145(ENSP00000431608)->354(ENSP00000247194),(+)alt-C-terminus,(+)alt-N-terminus	(+)ACT_SITE-Proton acceptor,(+)Pro_racemase-IPR008794,(+)REGION-Substrate binding	(direct)Pro_racemase-IPR008794	metabolic process // hydro-lyase activity // proline racemase activity // trans-L-3-hydroxyproline dehydratase activity	-0.267225		E1-3|E1-4	TC14002325.hg	2
ENSG00000168904	0.339904		LRRC28	ENSG00000168904	leucine rich repeat containing 28 [Source:HGNC Symbol;Acc:28355]	upregulated	ei-ex	1	1	E19.3|E20.1		(+)AA:93(ENSP00000332035)->298(ENSP00000398606),(+)alt-coding	(+)Leu-rich_rpt-IPR001611,(+)Leu-rich_rpt_typical-subtyp-IPR003591,(+)REPEAT-LRR 3,(+)REPEAT-LRR 4,(+)REPEAT-LRR 9		protein binding	0.493342	cassette-exon|cassetteExon	E20-1	TC15000954.hg	5
ENSG00000093167	0.384274		LRRFIP2	ENSG00000093167	leucine rich repeat (in FLII) interacting protein 2 [Source:HGNC Symbol;Acc:6703]	upregulated	ei-ex	2	2	E6.2|E6.3	E9.1_37196163	(-)AA:25(ENST00000496825-PEP)->36(ENST00000482466-PEP),(-)alt-C-terminus,(-)alt-N-terminus			biological_process // Wnt receptor signaling pathway // protein binding // LRR domain binding // protein dimerization activity // cellular_component	-0.220308	cassette-exon	E6-2|E6-3|E9-1	TC03001286.hg	3
ENSG00000198862	0.333166		LTN1	ENSG00000198862	listerin E3 ubiquitin protein ligase 1 [Source:HGNC Symbol;Acc:13082]	upregulated	ei-ex	1	1	E15.2_30333044		(+)AA:813(ENSP00000373847)->1812(ENSP00000373846),(-)truncated	(+)MOD_RES-Phosphotyrosine,(+)ZN_FING-RING-type,(+)Znf_C3HC4_RING-type-IPR018957,(+)Znf_RING-CH-IPR011016,(+)Znf_RING-IPR001841		miR-targeted genes in muscle cell - TarBase:WP2005 // miR-targeted genes in lymphocytes - TarBase:WP2004 // miR-targeted genes in epithelium - TarBase:WP2002 // protein autoubiquitination // ubiquitin-protein ligase activity // binding // protein binding // zinc ion binding	0.150556		E15-1|E15-2	TC21000351.hg	2
ENSG00000108848	0.295961		LUC7L3	ENSG00000108848	LUC7-like 3 (S. cerevisiae) [Source:HGNC Symbol;Acc:24309]	upregulated	ei-ex	1	1	E14.1		(+)AA:6(ENST00000512549-PEP)->207(ENSP00000426371),(+)alt-C-terminus,(+)alt-N-terminus,(+)nonsense_mediated_decay	(+)COMPBIAS-Glu-rich,(+)LUC7-rel-IPR004882,(+)MOD_RES-N6-acetyllysine		mRNA processing // apoptosis // response to stress // RNA splicing // DNA binding // mRNA binding // protein binding // nucleus // plasma membrane // focal adhesion // nuclear speck	-0.723894	alt-C-term	E14-1	TC17000675.hg	3
ENSG00000127603	0.289489		MACF1	ENSG00000127603	microtubule-actin crosslinking factor 1 [Source:HGNC Symbol;Acc:13664]	upregulated	ei-ex	1	1	E68.1					mesoderm formation // ATP catabolic process // posttranslational protein targeting to membrane // cellular component movement // cell cycle arrest // establishment or maintenance of cell polarity // biological_process // regulation of epithelial cell migration // Wnt receptor signaling pathway // positive regulation of Wnt receptor signaling pathway // regulation of microtubule-based process // w…	-0.381556	alt-N-term	E68-1	TC01000493.hg	3
ENSG00000151276	0.215716		MAGI1	ENSG00000151276	membrane associated guanylate kinase, WW and PDZ domain containing 1 [Source:HGNC Symbol;Acc:946]	downregulated	ei-ex	1	1		E16.1	(-)AA:40(ENST00000494271-PEP)->185(ENSP00000418044),(-)alt-C-terminus,(-)alt-N-terminus,(-)retained_intron	(-)COMPBIAS-Poly-Gln,(-)DOMAIN-WW 1,(-)HELIX,(-)STRAND,(-)TURN,(-)WW_dom-IPR001202	(direct)WW_dom-IPR001202, (direct)PDZ-IPR001478	protein complex assembly // cell adhesion // cell surface receptor linked signaling pathway // protein binding // ATP binding // protein C-terminus binding // alpha-actinin binding // cytoplasm // plasma membrane // cell-cell junction // tight junction // cell projection	-0.21187	bleedingExon	E16-1|E16-2|E32-1	TC03001528.hg	4
ENSG00000111837	0.208104		MAK	ENSG00000111837	male germ cell-associated kinase [Source:HGNC Symbol;Acc:6816]	upregulated	ei-ex	2	2	E18.1_10764855	E15.1	(-)AA:583(BAJ84080.1)->648(AEL29206.1),(-)alt-coding			transcription, DNA-dependent // regulation of transcription, DNA-dependent // protein phosphorylation // multicellular organismal development // spermatogenesis // cell differentiation // photoreceptor cell maintenance // protein autophosphorylation // transcription coactivator activity // protein kinase activity // protein serine/threonine kinase activity // cyclin-dependent protein kinase activ…	0.121613		E15-1|E18-1	TC06001269.hg	2
ENSG00000135341	0.207471		MAP3K7	ENSG00000135341	mitogen-activated protein kinase kinase kinase 7 [Source:HGNC Symbol;Acc:6859]	upregulated	ei-ex	1	1	E15.1		(-)AA:518(ENSP00000358331)->606(ENSP00000358335),(-)alt-C-terminus	(-)MAPKKK7-IPR017421	(direct)MAPKKK7-IPR017421	NLR Proteins:WP288 // Wnt Signaling Pathway and Pluripotency:WP399 // Insulin Signaling:WP481 // EBV LMP1 signaling:WP262 // RANKL/RANK Signaling Pathway:WP2018 // Toll-like receptor signaling pathway:WP75 // IL17 signaling pathway:WP2112 // IL-1 signaling pathway:WP195 // MAPK Signaling Pathway:WP382 // BCL-XL prevents the binding of truncated BID to BAX. This is prevented by BAD. BAD can displa…	0.285711		E15-1	TC06001948.hg	2
ENSG00000138834	0.287859		MAPK8IP3	ENSG00000138834	mitogen-activated protein kinase 8 interacting protein 3 [Source:HGNC Symbol;Acc:6884]	upregulated	ei-ex	2	2	E11.1|E12.1,E12.1		(+)AA:1330(ENSP00000348290)->1336(ENSP00000250894),(+)alt-coding			MAPK Signaling Pathway:WP382 // in utero embryonic development // JNK cascade // activation of JUN kinase activity // axon guidance // respiratory gaseous exchange // protein localization // post-embryonic development // regulation of gene expression // vesicle-mediated transport // forebrain development // positive regulation of JUN kinase activity // regulation of JNK cascade // lung alveolus d…	-0.284871	cassette-exon|cassetteExon	E12-1	TC16000045.hg	5
ENSG00000015479	0.283171		MATR3	ENSG00000015479	matrin 3 [Source:HGNC Symbol;Acc:6912]	upregulated	ei-ex	4	3	E4.2	E4.1|E5.1,E6.1|E11.1	(+)AA:47(ENSP00000424431)->50(ENST00000506188-PEP),(+)AA:50(ENST00000506188-PEP)->107(ENSP00000422233),(+)AA:81(ENSP00000421666)->791(AK307872-PEP),(+)alt-C-terminus,(+)alt-N-terminus,(+)truncated,(-)AA:107(ENSP00000422233)->895(ENSP00000378279)	(+)DOMAIN-RRM 1,(+)DOMAIN-RRM 2,(+)MOD_RES-N6-acetyllysine,(+)MOD_RES-Phosphoserine,(+)MOD_RES-Phosphotyrosine,(+)RRM_dom-IPR000504,(+)Znf_U1-IPR003604,(-)DOMAIN-RRM 1,(-)DOMAIN-RRM 2,(-)MOD_RES-N6-acetyllysine,(-)MOD_RES-Phosphoserine,(-)MOD_RES-Phosphothreonine,(-)MOD_RES-Phosphotyrosine,(-)RRM_dom-IPR000504,(-)ZN_FING-Matrin-type,(-)Znf_C2H2_matrin-IPR000690,(-)Znf_U1-IPR003604		miR-targeted genes in leukocytes - TarBase:WP2003 // miR-targeted genes in muscle cell - TarBase:WP2005 // miR-targeted genes in lymphocytes - TarBase:WP2004 // miR-targeted genes in epithelium - TarBase:WP2002 // nucleotide binding // nucleic acid binding // RNA binding // structural molecule activity // protein binding // zinc ion binding // nucleus // nuclear inner membrane // nuclear matrix	-0.2563	alt-5'|cassette-exon|altFivePrime|cassetteExon, alt-C-term|mutually-exclusive-exon|cassetteExon, cassette-exon|cassetteExon	E11-1|E4-1|E4-2	TC05000707.hg	5
ENSG00000078070	0.203758		MCCC1	ENSG00000078070	methylcrotonoyl-CoA carboxylase 1 (alpha) [Source:HGNC Symbol;Acc:6936]	downregulated	ei-ex	1	1		E19.1_182743608	(-)AA:434(ENSP00000420648)->725(ENSP00000265594),(-)alt-C-terminus,(-)alt-N-terminus,(-)nonsense_mediated_decay	(+)Biotin_COase_C-IPR005482,(+)Biotin_carboxylation_dom-IPR011764,(-)Biotin_COase_C-IPR005482,(-)Biotin_carboxylation_dom-IPR011764,(-)Biotin_lipoyl-IPR000089,(-)DOMAIN-Biotin carboxylation,(-)DOMAIN-Biotinyl-binding,(-)MOD_RES-N6-biotinyllysine,(-)PreATP-grasp_dom-IPR016185,(-)Rudment_hybrid_motif-IPR011054,(-)STRAND,(-)Single_hybrid_motif-IPR011053,(-)TRANSIT-Mitochondrion		leucine catabolic process // biotin metabolic process // metabolic process // branched chain family amino acid catabolic process // cellular nitrogen compound metabolic process // small molecule metabolic process // catalytic activity // biotin carboxylase activity // methylcrotonoyl-CoA carboxylase activity // protein binding // ATP binding // D-alanine-D-alanine ligase activity // biotin bindin…	-0.639707	cassette-exon|cassetteExon	E19-1	TC03002053.hg	5
ENSG00000180398	0.214489		MCFD2	ENSG00000180398	multiple coagulation factor deficiency 2 [Source:HGNC Symbol;Acc:18451]	upregulated	ei-ex	1	1	E7.1_47136332|E1.5		(+)AA:146(ENSP00000402717)->146(ENSP00000386386)			protein transport // vesicle-mediated transport // protein N-linked glycosylation via asparagine // post-translational protein modification // cellular protein metabolic process // calcium ion binding // endoplasmic reticulum // ER-Golgi intermediate compartment // Golgi apparatus // ER to Golgi transport vesicle membrane	0.144104	cassette-exon|cassetteExon	E7-1	TC02001818.hg	5
ENSG00000138382	0.24128		METTL5	ENSG00000138382	methyltransferase like 5 [Source:HGNC Symbol;Acc:25006]	downregulated	ei-ex	1	1		E6.3_170669032	(+)AA:110(ENSP00000387106)->126(ENSP00000395792),(+)alt-N-terminus		(direct)RNA_MeTrfase_RsmD-IPR004398, (direct)RNA_cap_Gua-N2-MeTrfase-IPR019012	RNA methylation // protein methylation // metabolic process // RNA capping // rRNA methylation // nucleic acid binding // methyltransferase activity // protein methyltransferase activity // cytoplasm	-0.220117	alt-3'	E6-2|E6-3	TC02002512.hg	3
ENSG00000168958	0.344651		MFF	ENSG00000168958	mitochondrial fission factor [Source:HGNC Symbol;Acc:24858]	upregulated	ei-ex	10	5	E10.2,E10.5|E11.2,E11.2	E10.2|E8.1,E11.2|E8.1	(+)AA:218(ENSP00000346498)->238(ENSP00000304134),(+)AA:218(ENSP00000346498)->291(ENSP00000304898),(+)AA:243(ENSP00000338412)->342(ENSP00000302037),(+)AA:71(ENSP00000435354)->154(ENSP00000415313),(+)AA:71(ENSP00000435354)->89(ENSP00000436289),(+)alt-C-terminus,(+)alt-N-terminus,(+)alt-coding,(-)AA:130(ENST00000490857-PEP)->154(ENSP00000415313),(-)AA:238(ENSP00000304134)->243(ENSP00000338412),(-)AA…	(+)COILED,(+)FATE/Miff/Tango-11-IPR008518,(+)MOD_RES-Phosphoserine,(+)MOD_RES-Phosphothreonine,(+)TOPO_DOM-Cytoplasmic,(+)TOPO_DOM-Mitochondrial intermembrane,(+)TRANSMEM-Helical; Anchor for type IV membrane protein;,(-)COILED,(-)FATE/Miff/Tango-11-IPR008518,(-)MOD_RES-Phosphoserine,(-)TOPO_DOM-Mitochondrial intermembrane,(-)TRANSMEM-Helical; Anchor for type IV membrane protein;	(direct)FATE/Miff/Tango-11-IPR008518, (direct)TOPO_DOM-Cytoplasmic-UniProt	release of cytochrome c from mitochondria // protein targeting to mitochondrion // regulation of mitochondrion organization // peroxisome fission // mitochondrial fragmentation involved in apoptosis // protein homooligomerization // mitochondrion morphogenesis // positive regulation of release of cytochrome c from mitochondria // protein binding // cytoplasm // mitochondrion // mitochondrial oute…	0.0712333	altThreePrime|cassette-exon|cassetteExon, cassetteExon|mutually-exclusive-exon	E10-2|E10-3|E10-5|E11-2|E8-1	TC02001362.hg	5
ENSG00000143198	0.224204		MGST3	ENSG00000143198	microsomal glutathione S-transferase 3 [Source:HGNC Symbol;Acc:7064]	downregulated	ei-ex	1	1		E11.1	(-)AA:113(ENST00000477450-PEP)->166(ENSP00000356861),(-)alt-C-terminus,(-)alt-N-terminus	(-)LIPID-S-palmitoyl cysteine,(-)Membr-assoc_MAPEG-IPR001129,(-)TRANSMEM-Helical;		metapathway biotransformation:WP702 // lipid metabolic process // glutathione biosynthetic process // xenobiotic metabolic process // signal transduction // small molecule metabolic process // glutathione transferase activity // peroxidase activity // glutathione peroxidase activity // nuclear envelope // endoplasmic reticulum // endoplasmic reticulum membrane // membrane // integral to membrane …	1.23415	alt-C-term	E11-1	TC01001443.hg	3
ENSG00000133816	0.203347		MICAL2	ENSG00000133816	microtubule associated monooxygenase, calponin and LIM domain containing 2 [Source:HGNC Symbol;Acc:24693]	upregulated	ei-ex	1	1	E29.1		(+)AA:784(ENST00000528931-PEP)->1103(ENSP00000344894),(+)alt-C-terminus,(+)alt-N-terminus,(+)microRNA-target(hsa-miR-202:miRanda),(+)retained_intron	(+)BINDING-FAD,(+)CHP00275_HI0933-like-IPR004792,(+)FAD_bind_dom-IPR003953,(+)NP_BIND-FAD,(+)Pyr_OxRdtase_NAD-bd_dom-IPR001327,(+)Pyr_nucl-diS_OxRdtase_FAD/NAD-IPR023753,(+)REGION-Monooxygenase domain,(+)Rng_hydrolase-like-IPR003042,(+)mOase_FAD-bd-IPR002938		actin filament depolymerization // oxidation-reduction process // actin binding // protein binding // zinc ion binding // oxidoreductase activity // oxidoreductase activity, acting on paired donors, with incorporation or reduction of molecular oxygen, NADH or NADPH as one donor, and incorporation of one atom of oxygen // flavin adenine dinucleotide binding // FAD binding // cytoplasm // cytoskele…	0.233235	cassette-exon|cassetteExon	E29-1	TC11000198.hg	5
ENSG00000158411	0.391986		MITD1	ENSG00000158411	MIT, microtubule interacting and transport, domain containing 1 [Source:HGNC Symbol;Acc:25207]	upregulated	ei-ex	2	2	E4.1,E6.2_99787131		(-)AA:197(ENSP00000387316)->249(ENSP00000289359),(-)alt-C-terminus	(-)HELIX,(-)REGION-Important for association with membranes,(-)STRAND	(direct)DOMAIN-MIT-UniProt	cytokinesis after mitosis // cytokinetic cell separation // transport // protein binding // extrinsic to membrane // midbody // late endosome membrane // intracellular membrane-bounded organelle	-0.218432	exon-region-exclusion	E4-1|E6-1|E6-2	TC02002132.hg	3
ENSG00000076242	0.243648		MLH1	ENSG00000076242	mutL homolog 1, colon cancer, nonpolyposis type 2 (E. coli) [Source:HGNC Symbol;Acc:7127]	downregulated	ei-ex	4	3		E13.3,E13.3|E15.1,E15.1|E13.3	(+)AA:52(ENSP00000400844)->95(ENSP00000411066),(+)alt-C-terminus,(+)alt-N-terminus,(+)nonsense_mediated_decay,(-)AA:52(ENSP00000400844)->58(ENSP00000399329),(-)alt-C-terminus,(-)alt-N-terminus,(-)nonsense_mediated_decay	(+)DNA_mismatch_repair_C-IPR013507,(+)HELIX,(+)Ribosomal_S5_D2-typ_fold-IPR020568,(-)DNA_mismatch_repair_C-IPR013507,(-)HELIX,(-)Ribosomal_S5_D2-typ_fold-IPR020568	(direct)STRAND-UniProt, (direct)DNA_mismatch_repair_C-IPR013507, (direct)DNA_mismatch_repair_N-IPR014763, (direct)Ribosomal_S5_D2-typ_fold-IPR020568	Ovarian Infertility Genes:WP34 // Mismatch repair:WP531 // pachytene // nuclear-transcribed mRNA poly(A) tail shortening // resolution of meiotic recombination intermediates // somatic recombination of immunoglobulin genes involved in immune response // ATP catabolic process // DNA repair // mismatch repair // double-strand break repair via nonhomologous end joining // response to DNA damage stim…	-0.100237	cassetteExon, cassetteExon|mutually-exclusive-exon	E13-3|E15-1	TC03000175.hg	5
ENSG00000267910	0.274549		MLL	ENSG00000267910	myeloid/lymphoid or mixed-lineage leukemia (trithorax homolog, Drosophila) [Source:HGNC Symbol;Acc:7132]	downregulated	ei-ex	1	1		E11.1	(-)microRNA-target(hsa-miR-9:miRanda)		(direct)SITE-Breakpoint for translocation to form KMT2A-AF3P21 and KMT2A-CASC5 oncogenes-UniProt, (direct)SITE-Breakpoint for translocation to form KMT2A-CENPK oncogene-UniProt, (direct)MeTrfase_trithorax-IPR016569, (direct)SITE-Breakpoint for translocation to form KMT2A-FRYL fusion protein-UniProt	DNA methylation // regulation of transcription, DNA-dependent // transcription from RNA polymerase II promoter // protein complex assembly // apoptosis // negative regulation of cell proliferation // anterior/posterior pattern formation // positive regulation of transporter activity // embryonic hemopoiesis // histone H4-K16 acetylation // positive regulation of transcription, DNA-dependent // po…	0.167321	cassette-exon	E11-1	TC11001064.hg	3
ENSG00000055609	0.394523		MLL3	ENSG00000055609	myeloid/lymphoid or mixed-lineage leukemia 3 [Source:HGNC Symbol;Acc:13726]	upregulated	ei-ex	4	3	E46.2_151853375	E44.1,E45.1	(-)AA:1524(ENSP00000410411)->2441(ENSP00000353218),(-)AA:1524(ENSP00000410411)->4911(ENSP00000262189),(-)alt-C-terminus,(-)alt-N-terminus	(+)DOMAIN-Post-SET,(+)DOMAIN-SET,(+)METAL-Zinc,(+)Post-SET_dom-IPR003616,(+)SET_dom-IPR001214,(-)COILED,(-)COMPBIAS-Asp-rich,(-)COMPBIAS-Gln-rich,(-)COMPBIAS-Pro-rich,(-)DNA_BIND-A,(-)HELIX,(-)HMG_box_dom-IPR009071,(-)MOD_RES-N6-acetyllysine,(-)MOD_RES-Phosphoserine,(-)SET_dom-IPR001214,(-)STRAND,(-)TURN,(-)ZN_FING-DHHC-type,(-)ZN_FING-PHD-type 1,(-)ZN_FING-PHD-type 2,(-)ZN_FING-PHD-type 3,(-)ZN_…		Histone Modifications:WP2369 // transcription, DNA-dependent // regulation of transcription, DNA-dependent // histone methylation // intracellular signal transduction // histone H3-K4 methylation // DNA binding // protein binding // methyltransferase activity // zinc ion binding // histone methyltransferase activity (H3-K4 specific) // nucleus // histone methyltransferase complex	-0.0228793	alt-3', cassette-exon, cassette-exon|cassetteExon	E44-1|E45-1|E46-1|E46-2	TC07002045.hg	5
ENSG00000078403	0.402208		MLLT10	ENSG00000078403	myeloid/lymphoid or mixed-lineage leukemia (trithorax homolog, Drosophila); translocated to, 10 [Source:HGNC Symbol;Acc:16063]	upregulated	ei-ex	6	4	E21.1,E6.1	E19.1,E19.1|E20.1	(+)AA:1011(ENSP00000401406)->1027(ENSP00000366272),(+)AA:180(ENSP00000399883)->361(ENSP00000408281),(+)alt-C-terminus,(+)alt-N-terminus,(+)alt-coding,(+)microRNA-target(hsa-miR-1:mirbase,hsa-miR-101:miRanda,hsa-miR-10a:miRanda|mirbase,hsa-miR-10b:RNAhybrid|miRanda|mirbase,hsa-miR-125b-2*:mirbase,hsa-miR-134:RNAhybrid|miRanda|mirbase,hsa-miR-138:miRanda|mirbase,hsa-miR-143:RNAhybrid|miRanda|mirbas…	(+)MOD_RES-Phosphoserine,(+)REGION-DNA-binding,(+)SITE-KMT2A/MLL1 fusion point (in acute myeloid leukemia patient A),(+)SITE-KMT2A/MLL1 fusion point (in acute myeloid leukemia patient B),(+)SITE-KMT2A/MLL1 fusion point (in acute myeloid leukemia patient C),(-)MOD_RES-Phosphoserine,(-)REGION-DNA-binding,(-)SITE-KMT2A/MLL1 fusion point (in acute myeloid leukemia patient A),(-)SITE-KMT2A/MLL1 fusion…	(indirect)REGION-DNA-binding-UniProt, (direct)REGION-DNA-binding-UniProt, (direct)Znf_FYVE_PHD-IPR011011	transcription, DNA-dependent // positive regulation of transcription from RNA polymerase II promoter // DNA binding // sequence-specific DNA binding transcription factor activity // protein binding // zinc ion binding // nucleus // cytoplasm	-0.0850433	cassette-exon, cassette-exon|cassetteExon	E19-1|E20-1|E21-1|E6-1	TC10000152.hg	5
ENSG00000130396	0.456687		MLLT4	ENSG00000130396	myeloid/lymphoid or mixed-lineage leukemia (trithorax homolog, Drosophila); translocated to, 4 [Source:HGNC Symbol;Acc:7137]	upregulated	ei-ex	2	1	E17.1		(+)AA:1824(ENSP00000404595)->1831(ENSP00000252692),(+)alt-coding	(+)Dilute-IPR002710,(-)DOMAIN-Dilute,(-)Dilute-IPR002710	(direct)Dilute-IPR002710	cell adhesion // signal transduction // cell-cell signaling // cell junction assembly // adherens junction organization // cell-cell junction organization // protein binding // protein C-terminus binding // cell adhesion molecule binding // nucleus // cytoplasm // cytosol // plasma membrane // cell-cell junction // adherens junction // cell-cell adherens junction // cell junction // apical part o…	-0.152745	cassette-exon	E17-1	TC06001184.hg	3
ENSG00000146263	0.303039		MMS22L	ENSG00000146263	MMS22-like, DNA repair protein [Source:HGNC Symbol;Acc:21475]	upregulated	ei-ex	1	1	E16.1_97679544		(+)AA:88(ENSP00000421225)->1203(ENSP00000358254),(+)alt-C-terminus,(+)alt-N-terminus	(+)ARM-type_fold-IPR016024		double-strand break repair via homologous recombination // replication fork processing // binding // protein binding // FACT complex // MCM complex // nuclear replication fork	0.66392	alt-C-term	E16-1	TC06001959.hg	3
ENSG00000121211	0.283314		MND1	ENSG00000121211	meiotic nuclear divisions 1 homolog (S. cerevisiae) [Source:HGNC Symbol;Acc:24839]	upregulated	ei-ex	2	1	E6.1		(+)AA:126(ENSP00000427559)->205(ENSP00000240488),(+)alt-C-terminus,(+)nonsense_mediated_decay,(-)AA:126(ENSP00000427559)->205(ENSP00000240488),(-)alt-C-terminus,(-)nonsense_mediated_decay	(+)BlaI_family-IPR005650,(+)COILED,(+)Mnd1-IPR005647,(-)BlaI_family-IPR005650,(-)COILED,(-)Mnd1-IPR005647	(direct)Mnd1-IPR005647	DNA recombination // meiosis // negative regulation of transcription, DNA-dependent // DNA binding // protein binding // nucleus	-0.467325	cassette-exon|cassetteExon	E6-1	TC04000773.hg	5
ENSG00000123562	0.376718		MORF4L2	ENSG00000123562	mortality factor 4 like 2 [Source:HGNC Symbol;Acc:16849]	upregulated	ei-ex	9	3	E3.5,E5.3_102931995	E3.8|E3.9	(+)AA:288(ENSP00000410532)->288(ENSP00000394417),(+)AA:67(ENSP00000408607)->111(ENST00000492116-PEP),(+)AA:67(ENSP00000408607)->177(ENSP00000393283),(+)alt-C-terminus,(+)truncated,(-)AA:111(ENST00000492116-PEP)->177(ENSP00000393283),(-)AA:111(ENST00000492116-PEP)->288(ENSP00000391969),(-)AA:111(ENST00000492116-PEP)->288(ENSP00000394417),(-)AA:111(ENST00000492116-PEP)->288(ENSP00000410532),(-)AA:2…	(+)Chromodomain-like-IPR016197,(+)MOD_RES-Phosphoserine,(+)MRG_dom-IPR026541,(+)MUTAGEN-Missing: Abrogates both transcriptional activation and repression by MORF4L2,(-)Chromodomain-like-IPR016197,(-)DOMAIN-MRG,(-)MOD_RES-Phosphoserine,(-)MOD_RES-Phosphotyrosine,(-)MRG_dom-IPR026541,(-)MUTAGEN-Missing: Abrogates both transcriptional activation and repression by MORF4L2		regulation of cell growth // DNA repair // transcription, DNA-dependent // chromatin modification // positive regulation of transcription from RNA polymerase II promoter // positive regulation of striated muscle cell differentiation // protein binding // nucleus // nucleolus	-0.397293	alt-3', alt-5'|cassetteExon, exon-region-exclusion|exon-region-exclusion	E3-5|E3-6|E3-8|E3-9|E5-2|E5-3	TC0X001242.hg	5
ENSG00000163319	0.211901		MRPS18C	ENSG00000163319	mitochondrial ribosomal protein S18C [Source:HGNC Symbol;Acc:16633]	downregulated	ei-ex	2	1		E3.1	(+)AA:114(ENSP00000427169)->142(ENSP00000295491),(+)alt-coding,(-)AA:114(ENSP00000427169)->142(ENSP00000295491),(-)alt-coding	(+)Ribosomal_S18-IPR001648,(-)Ribosomal_S18-IPR001648	(direct)Ribosomal_S18-IPR001648	translation // structural constituent of ribosome // intracellular // mitochondrion // mitochondrial small ribosomal subunit // ribosome	-0.115828	mutually-exclusive-exon	E3-1	TC04000459.hg	3
ENSG00000134602	0.249584		MST4	ENSG00000134602	Serine/threonine-protein kinase MST4 [Source:UniProtKB/Swiss-Prot;Acc:Q9P289]	downregulated	ei-ex	1	1		E8.1	(-)AA:354(ENSP00000419702)->416(ENSP00000377867),(-)alt-coding	(+)Kinase-like_dom-IPR011009,(+)Prot_kinase_cat_dom-IPR000719,(+)Ser/Thr_dual-sp_kinase_dom-IPR002290,(+)Tyr_kinase_cat_dom-IPR020635,(-)DOMAIN-Protein kinase,(-)HELIX,(-)Kinase-like_dom-IPR011009,(-)Prot_kinase_cat_dom-IPR000719,(-)STRAND,(-)Ser-Thr/Tyr_kinase_cat_dom-IPR001245,(-)Ser/Thr_dual-sp_kinase_dom-IPR002290,(-)TURN,(-)Tyr_kinase_cat_dom-IPR020635	(direct)Ser-Thr/Tyr_kinase_cat_dom-IPR001245, (direct)Ser/Thr_dual-sp_kinase_dom-IPR002290, (direct)Prot_kinase_cat_dom-IPR000719, (direct)Kinase-like_dom-IPR011009, (direct)Tyr_kinase_cat_dom-IPR020635	protein phosphorylation // apoptosis // cellular component disassembly involved in apoptosis // regulation of apoptosis // magnesium ion binding // protein kinase activity // protein serine/threonine kinase activity // protein tyrosine kinase activity // protein binding // ATP binding // transferase activity, transferring phosphorus-containing groups // identical protein binding // Golgi membrane…	-0.19786	cassette-exon|cassetteExon	E8-1	TC0X000628.hg	5
ENSG00000127989	0.227441		MTERF	ENSG00000127989	mitochondrial transcription termination factor [Source:HGNC Symbol;Acc:21463]	downregulated	ei-ex	1	1		E4.1_91504094	(-)AA:379(ENSP00000384986)->399(ENSP00000248643),(-)alt-N-terminus	(-)TRANSIT-Mitochondrion	(direct)TRANSIT-Mitochondrion-UniProt	Mitochondrial Gene Expression:WP391 // transcription termination, DNA-dependent // regulation of transcription, DNA-dependent // transcription from mitochondrial promoter // termination of mitochondrial transcription // gene expression // DNA geometric change // double-stranded DNA binding // protein binding // mitochondrion // mitochondrial matrix // mitochondrial nucleoid	-0.0399183		E4-1	TC07001595.hg	2
ENSG00000150712	0.264005		MTMR12	ENSG00000150712	myotubularin related protein 12 [Source:HGNC Symbol;Acc:18191]	upregulated	ei-ex	3	3	E15.3,E18.1_32230469	E15.3	(-)AA:693(ENSP00000280285)->747(ENSP00000371577),(-)alt-coding	(-)DOMAIN-Myotubularin phosphatase,(-)REGION-Interaction with MTM1	(direct)DOMAIN-Myotubularin phosphatase-UniProt, (direct)REGION-Interaction with MTM1-UniProt	phosphatase activity // cytoplasm	0.299689	cassette-exon|cassetteExon	E15-3|E18-1	TC05001233.hg	5
ENSG00000185499	0.256694		MUC1	ENSG00000185499	mucin 1, cell surface associated [Source:HGNC Symbol;Acc:7508]	downregulated	ei-ex	7	5	E5.3	E4.17,E7.2_155160036,E8.2_155159866,E8.2_155159866|E4.17	(+)AA:105(AAP97024.1)->184(ENST00000498431-PEP),(+)AA:128(ENST00000485118-PEP)->203(ENSP00000339690),(+)AA:166(ENSP00000342814)->203(ENSP00000339690),(+)AA:168(ENSP00000357374)->203(ENSP00000339690),(+)AA:49(ACI25185.1)->105(ACI25167.1),(+)AA:80(ENST00000467134-PEP)->203(ENSP00000339690),(+)alt-C-terminus,(+)alt-N-terminus,(+)alt-coding,(-)truncated	(+)HELIX,(+)LIPID-S-palmitoyl cysteine,(+)MOD_RES-Phosphoserine; by GSK3-beta,(+)MOD_RES-Phosphothreonine; by PKC/PRKCD,(+)MOD_RES-Phosphotyrosine,(+)MOD_RES-Phosphotyrosine; by CSK, EGFR and SRC,(+)MOD_RES-Phosphotyrosine; by PDGFR,(+)MOTIF-Interaction with GRB2,(+)MOTIF-Interaction with SRC and ESR1,(+)MOTIF-Required for interaction with AP1S2,(+)REGION-Interaction with P53,(+)REGION-Required f…	(direct)SEA_dom-IPR000082	DNA damage response, signal transduction by p53 class mediator resulting in cell cycle arrest // DNA damage response, signal transduction by p53 class mediator resulting in transcription of p21 class mediator // negative regulation of transcription by competitive promoter binding // O-glycan processing // negative regulation of apoptosis // regulation of transcription from RNA polymerase II promo…	0.614571	alt-3'|cassetteExon|exon-region-exclusion, altFivePrime|exon-region-exclusion|exon-region-exclusion, altThreePrime|cassetteExon|exon-region-exclusion|exon-region-exclusion, cassetteExon|exon-region-exclusion|exon-region-exclusion, cassetteExon|exon-region-exclusion|mutually-exclusive-exon	E2-10|E2-8|E4-17|E5-3|E7-1|E7-2|E8-2	TC01006383.hg	5
ENSG00000128833	0.240837		MYO5C	ENSG00000128833	myosin VC [Source:HGNC Symbol;Acc:7604]	upregulated	ei-ex	1	1	E11.1_52556509		(+)AA:269(ENSP00000453641)->1742(ENSP00000261839),(+)nonsense_mediated_decay,(-)truncated	(+)COILED,(+)DOMAIN-Dilute,(+)DOMAIN-IQ 1,(+)DOMAIN-IQ 2,(+)DOMAIN-IQ 3,(+)DOMAIN-IQ 4,(+)DOMAIN-IQ 5,(+)DOMAIN-Myosin head-like,(+)Dil_domain-IPR018444,(+)Dilute-IPR002710,(+)IQ_motif_EF-hand-BS-IPR000048,(+)Myosin_head_motor_dom-IPR001609,(+)P-loop_NTPase-IPR027417,(-)Myosin_head_motor_dom-IPR001609	(direct)P-loop_NTPase-IPR027417, (direct)DOMAIN-Myosin head-like-UniProt, (direct)Myosin_head_motor_dom-IPR001609	motor activity // actin binding // protein binding // calmodulin binding // ATP binding // actin filament binding // myosin complex	0.0383914		E11-1	TC15001454.hg	2
ENSG00000066933	0.236146		MYO9A	ENSG00000066933	myosin IXA [Source:HGNC Symbol;Acc:7608]	upregulated	ei-ex	2	2	E32.1|E32.2_72180473	E30.1	(+)AA:2529(ENSP00000398250)->2619(ENSP00000399162),(+)alt-coding	(+)DOMAIN-Myosin head-like 1,(+)Myosin_head_motor_dom-IPR001609,(+)P-loop_NTPase-IPR027417,(-)Myosin_head_motor_dom-IPR001609,(-)P-loop_NTPase-IPR027417,(-)REGION-Tail	(direct)REGION-Tail-UniProt	signal transduction // small GTPase mediated signal transduction // visual perception // intracellular signal transduction // regulation of small GTPase mediated signal transduction // motor activity // actin binding // GTPase activator activity // protein binding // ATP binding // metal ion binding // intracellular // cytosol // integral to membrane // myosin complex // unconventional myosin com…	-0.454947		E30-1|E30-2|E32-1|E32-2	TC15001620.hg	2
ENSG00000162601	0.207655		MYSM1	ENSG00000162601	Myb-like, SWIRM and MPN domains 1 [Source:HGNC Symbol;Acc:29401]	upregulated	ei-ex	1	1	E8.1_59150939|E4.2		(-)AA:111(ENST00000466774-PEP)->575(ENST00000493821-PEP),(-)alt-C-terminus,(-)alt-N-terminus	(-)DOMAIN-MPN,(-)DOMAIN-SWIRM,(-)HELIX,(-)Homeodomain-like-IPR009057,(-)JAB1_Mov34_MPN_PAD1-IPR000555,(-)METAL-Zinc; catalytic,(-)METAL-Zinc; catalytic (Probable),(-)MOD_RES-Phosphoserine,(-)MOTIF-JAMM motif,(-)MOTIF-LXXLL motif,(-)STRAND,(-)SWIRM-IPR007526,(-)TURN	(direct)Myb-like_dom-IPR017877, (direct)HELIX-UniProt, (direct)Homeodomain-like-IPR009057, (direct)DOMAIN-SANT-UniProt, (direct)SANT/Myb-IPR001005	transcription, DNA-dependent // proteolysis // histone deubiquitination // positive regulation of transcription, DNA-dependent // DNA binding // chromatin binding // transcription coactivator activity // ubiquitin thiolesterase activity // ubiquitin-specific protease activity // protein binding // metallopeptidase activity // histone binding // metal ion binding // nucleus	-0.573009		E8-1	TC01002707.hg	2
ENSG00000102471	0.315608		NDFIP2	ENSG00000102471	Nedd4 family interacting protein 2 [Source:HGNC Symbol;Acc:18537]	upregulated	ei-ex	1	1	E8.2		(+)AA:156(ENSP00000419776)->233(ENSP00000419200),(+)alt-C-terminus,(+)alt-N-terminus,(+)nonsense_mediated_decay	(+)NEDD4/BSD2-IPR019325,(+)TOPO_DOM-Cytoplasmic,(+)TOPO_DOM-Extracellular,(+)TRANSMEM-Helical;,(-)NEDD4/BSD2-IPR019325	(direct)TRANSMEM-Helical-UniProt, (direct)NEDD4/BSD2-IPR019325, (direct)TOPO_DOM-Extracellular-UniProt, (direct)TOPO_DOM-Cytoplasmic-UniProt	signal transduction // negative regulation of gene expression // positive regulation of protein ubiquitination // negative regulation of transporter activity // positive regulation of I-kappaB kinase/NF-kappaB cascade // negative regulation of protein transport // signal transducer activity // protein binding // WW domain binding // Golgi membrane // cytoplasm // mitochondrion // endoplasmic reti…	0.0169133	cassette-exon|cassetteExon	E8-2	TC13000303.hg	5
ENSG00000156170	0.34041		NDUFAF6	ENSG00000156170	NADH dehydrogenase (ubiquinone) complex I, assembly factor 6 [Source:HGNC Symbol;Acc:28625]	downregulated	ei-ex	4	3	E12.1|E11.7	E12.2|E13.1,E13.1	(-)AA:58(ENSP00000428410)->121(ENSP00000429038),(-)AA:58(ENSP00000428410)->133(ENSP00000428034),(-)AA:58(ENSP00000428410)->95(ENSP00000429585),(-)alt-C-terminus,(-)alt-N-terminus,(-)microRNA-target(hsa-miR-101:miRanda,hsa-miR-587:mirbase),(-)nonsense_mediated_decay	(-)Squ/phyt_synthse-IPR002060,(-)TRANSIT-Mitochondrion,(-)Terpenoid_synth-IPR008949	(direct)TRANSIT-Mitochondrion-UniProt, (indirect)Squ/phyt_synthse-IPR002060, (direct)Terpenoid_synth-IPR008949, (direct)Squ/phyt_synthse-IPR002060, (indirect)Terpenoid_synth-IPR008949	biosynthetic process // mitochondrial respiratory chain complex I assembly // transferase activity // nucleus // cytoplasm // mitochondrion // mitochondrial inner membrane	-0.135837	alt-5'|cassette-exon|alt-N-term|altFivePrime|cassette-exon, alt-N-term, alt-N-term|cassette-exon|cassetteExon	E11-7|E12-1|E12-2|E13-1	TC08000579.hg	5
ENSG00000109674	0.249104		NEIL3	ENSG00000109674	nei endonuclease VIII-like 3 (E. coli) [Source:HGNC Symbol;Acc:24573]	upregulated	ei-ex	1	1	E5.1		(+)truncated,(-)AA:63(ENSP00000424735)->605(ENSP00000264596),(-)nonsense_mediated_decay	(-)BINDING-DNA,(-)DNA_glyclase/AP_lyase_DNA-bd-IPR015886,(-)DNA_glycosylase/AP_lyase_cat-IPR012319,(-)Ribosomal_S13-like_H2TH-IPR010979,(-)ZN_FING-FPG-type,(-)ZN_FING-RanBP2-type,(-)Znf_DNA_glyclase/AP_lyase-IPR000214,(-)Znf_GRF-IPR010666,(-)Znf_RanBP2-IPR001876	(direct)DNA_glyclase/AP_lyase_DNA-bd-IPR015886, (direct)Ribosomal_S13-like_H2TH-IPR010979	DNA repair // base-excision repair // nucleotide-excision repair // bubble DNA binding // nucleic acid binding // damaged DNA binding // double-stranded DNA binding // single-stranded DNA binding // DNA-(apurinic or apyrimidinic site) lyase activity // zinc ion binding // hydrolase activity, hydrolyzing N-glycosyl compounds // DNA N-glycosylase activity // nucleus	-0.449949	cassette-exon|cassetteExon	E5-1	TC04000874.hg	5
ENSG00000124588	0.278506		NQO2	ENSG00000124588	NAD(P)H dehydrogenase, quinone 2 [Source:HGNC Symbol;Acc:7856]	downregulated	ei-ex	1	1		E13.2	(-)AA:193(ENSP00000369821)->231(ENSP00000369795),(-)alt-coding,(-)microRNA-target(hsa-miR-454*:mirbase)	(-)FMN_red-IPR005025,(-)Flavodoxin_fold-IPR003680,(-)HELIX,(-)NP_BIND-FAD,(-)REGION-Substrate binding,(-)STRAND,(-)TURN	(direct)STRAND-UniProt, (direct)FMN_red-IPR005025, (direct)NP_BIND-FAD-UniProt, (direct)Flavodoxin_fold-IPR003680, (direct)HELIX-UniProt, (direct)TURN-UniProt	memory // dihydronicotinamide riboside quinone reductase activity // NADPH dehydrogenase (quinone) activity // electron carrier activity // metal ion binding // nucleus // cytoplasm	0.0930987	cassette-exon	E13-2	TC06004062.hg	3
ENSG00000143228	0.213389		NUF2	ENSG00000143228	NUF2, NDC80 kinetochore complex component, homolog (S. cerevisiae) [Source:HGNC Symbol;Acc:14621]	upregulated	ei-ex	1	1	E4.1|E3.8		(+)AA:47(ENST00000490881-PEP)->202(ENSP00000392652),(+)alt-C-terminus,(+)alt-N-terminus	(+)HELIX,(+)Kinetochore_Nuf2-IPR005549,(+)STRAND		M phase of mitotic cell cycle // mitotic anaphase // mitotic prometaphase // mitotic cell cycle // chromosome segregation // mitosis // cell division // molecular_function // protein binding // chromosome, centromeric region // condensed chromosome kinetochore // nucleus // cytosol // Ndc80 complex	-0.487933	cassette-exon	E4-1	TC01001430.hg	3
ENSG00000137497	0.214875		NUMA1	ENSG00000137497	nuclear mitotic apparatus protein 1 [Source:HGNC Symbol;Acc:8059]	upregulated	ei-ex	1	1	E35.4_71718497		(+)AA:964(ENSP00000440954)->979(ENSP00000260051),(+)alt-N-terminus	(+)MOD_RES-N6-acetyllysine,(+)MOD_RES-Phosphoserine,(+)MOD_RES-Phosphothreonine,(+)REGION-Head (Globular),(+)REGION-Tail (Globular),(-)MOD_RES-N6-acetyllysine,(-)MOD_RES-Phosphoserine,(-)tRNA-bd_arm-IPR010978	(direct)REGION-Tail (Globular)-UniProt	G2/M transition of mitotic cell cycle // mitotic anaphase // establishment of mitotic spindle orientation // mitotic cell cycle // nucleus organization // cell division // lung epithelial cell differentiation // nucleotide binding // structural molecule activity // protein binding // spindle pole // nucleus // nucleoplasm // chromosome // cytoplasm // spindle // cytosol // spindle microtubule // …	-0.677777	cassette-exon|exon-region-exclusion|exon-region-exclusion|retainedIntron	E35-3|E35-4	TC11002049.hg	5
ENSG00000223482	0.313584		NUTM2A-AS1	ENSG00000223482	NUTM2A antisense RNA 1 [Source:HGNC Symbol;Acc:45161]	upregulated	ei-ex	2	2	E11.2_89067833	E6.2	(+)AA:36(ENST00000458739-PEP)->90(ENST00000447424-PEP),(+)alt-C-terminus,(+)alt-N-terminus				0.360485	alt-C-term, alt-C-term|cassette-exon	E11-1|E11-2|E6-2	TC10001487.hg	3
ENSG00000105953	0.271708		OGDH	ENSG00000105953	oxoglutarate (alpha-ketoglutarate) dehydrogenase (lipoamide) [Source:HGNC Symbol;Acc:8124]	upregulated	ei-ex	5	4	E6.1,E7.1	E5.1,E6.1|E5.1	(+)AA:1019(ENSP00000392878)->1023(ENSP00000222673),(+)AA:1034(ENSP00000388183)->1038(ENSP00000414662),(+)alt-coding,(-)AA:1019(ENSP00000392878)->1034(ENSP00000388183),(-)alt-coding	(+)2oxoglutarate_DH_E1-IPR011603,(-)2oxoglutarate_DH_E1-IPR011603	(direct)2oxoglutarate_DH_E1-IPR011603	Tryptophan metabolism:WP465 // TCA Cycle:WP78 // generation of precursor metabolites and energy // glycolysis // tricarboxylic acid cycle // 2-oxoglutarate metabolic process // succinyl-CoA metabolic process // lysine catabolic process // NADH metabolic process // metabolic process // cerebellar cortex development // striatum development // hippocampus development // thalamus development // pyram…	0.172305	cassette-exon|cassetteExon, cassetteExon|mutually-exclusive-exon	E5-1|E6-1|E7-1	TC07000276.hg	5
ENSG00000154814	0.21304		OXNAD1	ENSG00000154814	oxidoreductase NAD-binding domain containing 1 [Source:HGNC Symbol;Acc:25128]	downregulated	ei-ex	1	1		E5.1	(+)AA:56(ENSP00000397374)->312(ENSP00000285083),(+)nonsense_mediated_decay,(-)truncated	(+)DOMAIN-FAD-binding FR-type,(+)Fe_red_NAD-bd_6-IPR013121,(+)NADH-Cyt_B5_reductase-IPR001834,(+)NP_BIND-NAD,(+)OxRdtase_FAD/NAD-bd-IPR001433,(+)Phe_hydroxylase-IPR001221,(+)Riboflavin_synthase-like_b-brl-IPR017938	(indirect)DOMAIN-FAD-binding FR-type-UniProt	oxidation-reduction process // oxidoreductase activity // mitochondrion	0.0514586	cassette-exon	E5-1	TC03000102.hg	3
ENSG00000163138	0.472333		PACRGL	ENSG00000163138	PARK2 co-regulated-like [Source:HGNC Symbol;Acc:28442]	upregulated	ei-ex	3	2	E13.1,E14.1		(+)AA:221(ENSP00000354171)->248(ENSP00000423881),(+)AA:93(ENSP00000425102)->200(ENSP00000425461),(+)alt-coding,(+)microRNA-target(hsa-miR-150:miRanda,hsa-miR-28-5p:miRanda,hsa-miR-338-3p:miRanda,hsa-miR-708:miRanda),(+)nonsense_mediated_decay,(-)truncated	(+)ARM-type_fold-IPR016024,(+)Parkin_co-regulated_protein-IPR019399	(indirect)Parkin_co-regulated_protein-IPR019399, (indirect)ARM-type_fold-IPR016024	binding	-0.0243666	cassette-exon|cassetteExon, cassetteExon|mutually-exclusive-exon	E13-1|E14-1	TC04000161.hg	5
ENSG00000145730	0.314735		PAM	ENSG00000145730	peptidylglycine alpha-amidating monooxygenase [Source:HGNC Symbol;Acc:8596]	upregulated	ei-ex	3	3	E26.1,E27.1|E26.1	E27.1	(+)AA:866(ENSP00000314638)->973(ENSP00000396493),(+)alt-coding,(+)microRNA-target(hsa-miR-1271:miRanda,hsa-miR-129-5p:miRanda,hsa-miR-142-3p:miRanda,hsa-miR-204:TargetScan|miRanda,hsa-miR-211:TargetScan|miRanda,hsa-miR-216a:miRanda,hsa-miR-24:RNAhybrid|miRanda,hsa-miR-378:miRanda,hsa-miR-422a:miRanda,hsa-miR-544:RNAhybrid|TargetScan|miRanda,hsa-miR-758:miRanda,hsa-miR-96:miRanda),(-)AA:866(ENSP00…	(+)REGION-Peptidylglycine alpha-hydroxylating monooxygenase,(+)TOPO_DOM-Intragranular,(-)REGION-Peptidylglycine alpha-hydroxylating monooxygenase,(-)TOPO_DOM-Intragranular	(direct)TOPO_DOM-Intragranular-UniProt	peptide amidation // response to hypoxia // long-chain fatty acid metabolic process // regulation of transcription from RNA polymerase II promoter // protein modification process // peptide metabolic process // central nervous system development // heart development // response to pH // toxin metabolic process // protein amidation // protein metabolic process // ovulation cycle process // respons…	-0.0590833	cassetteExon|mutually-exclusive-exon	E26-1|E27-1	TC05000497.hg	5
ENSG00000163291	0.340957		PAQR3	ENSG00000163291	progestin and adipoQ receptor family member III [Source:HGNC Symbol;Acc:30130]	upregulated	ei-ex	1	1	E1.10		(+)truncated,(-)AA:88(ENSP00000295462)->291(ENSP00000344203),(-)nonsense_mediated_decay	(-)HlyIII-related-IPR004254,(-)REGION-Golgi targeting,(-)TOPO_DOM-Cytoplasmic,(-)TOPO_DOM-Lumenal,(-)TRANSMEM-Helical;	(direct)TOPO_DOM-Cytoplasmic-UniProt	Golgi membrane // integral to membrane	0.605887		E1-10	TC04001325.hg	2
ENSG00000078674	0.229749		PCM1	ENSG00000078674	pericentriolar material 1 [Source:HGNC Symbol;Acc:8727]	downregulated	ei-ex	1	1		E3.1|E4.1	(+)AA:110(ENST00000518930-PEP)->408(ENSP00000429941),(+)alt-C-terminus,(+)alt-N-terminus	(+)COILED,(+)MOD_RES-N6-acetyllysine,(+)MOD_RES-Phosphoserine		G2/M transition of mitotic cell cycle // mitotic cell cycle // interkinetic nuclear migration // microtubule anchoring // microtubule anchoring at centrosome // cilium assembly // negative regulation of neurogenesis // centrosome organization // protein localization to centrosome // protein binding // identical protein binding // pericentriolar material // cytoplasm // centrosome // cytosol // nu…	-0.795168	cassette-exon	E4-1	TC08000135.hg	3
ENSG00000160613	0.380104		PCSK7	ENSG00000160613	proprotein convertase subtilisin/kexin type 7 [Source:HGNC Symbol;Acc:8748]	upregulated	ei-ex	5	5	E15.6,E19.1_11707753,E19.1_11707753|E15.6	E15.6,E19.1_117077530	(-)AA:176(ENST00000529458-PEP)->221(ENST00000527037-PEP),(-)AA:176(ENST00000529458-PEP)->237(ENSP00000441944),(-)alt-C-terminus,(-)alt-N-terminus,(-)retained_intron	(+)TOPO_DOM-Cytoplasmic,(+)TRANSMEM-Helical;,(-)ACT_SITE-Charge relay system,(-)Galactose-bd-like-IPR008979,(-)Peptidase_S8/S53_dom-IPR000209,(-)Peptidase_S8_subtilisin-rel-IPR015500,(-)PrprotnconvertsP-IPR002884	(direct)Galactose-bd-like-IPR008979, (direct)TOPO_DOM-Extracellular-UniProt, (direct)PrprotnconvertsP-IPR002884, (direct)DOMAIN-Homo B/P-UniProt	proteolysis // peptide hormone processing // serine-type endopeptidase activity // integral to Golgi membrane	-0.348857	exon-region-exclusion, exon-region-exclusion|exon-region-exclusion	E15-6|E19-1	TC11002334.hg	3
ENSG00000148985	0.219268		PGAP2	ENSG00000148985	post-GPI attachment to proteins 2 [Source:HGNC Symbol;Acc:17893]	upregulated	ei-ex	3	3	E6.2,E6.2|E11.5	E11.1	(+)AA:226(ENSP00000433377)->311(ENSP00000380183),(+)AA:80(ENSP00000435799)->311(ENSP00000380183),(+)alt-C-terminus,(+)alt-N-terminus,(+)microRNA-target(hsa-miR-128:miRanda,hsa-miR-383:miRanda)	(+)Frag1/DRAM/Sfk1-IPR019402,(+)TRANSMEM-Helical;	(direct)TRANSMEM-Helical-UniProt, (direct)Frag1/DRAM/Sfk1-IPR019402, (indirect)Frag1/DRAM/Sfk1-IPR019402	GPI anchor biosynthetic process // response to DNA damage stimulus // protein transport // signal transduction in response to DNA damage // negative regulation of apoptosis // protein binding // protein transporter activity // Golgi membrane // nucleus // endoplasmic reticulum membrane // integral to membrane	0.688712	alt-3'|cassetteExon, alt-3'|cassetteExon|mutually-exclusive-exon, alt-C-term|mutually-exclusive-exon|cassetteExon	E11-1|E11-3|E11-5|E6-2	TC11000085.hg	5
ENSG00000161395	0.203292		PGAP3	ENSG00000161395	post-GPI attachment to proteins 3 [Source:HGNC Symbol;Acc:23719]	downregulated	ei-ex	1	1		E4.4	(-)AA:269(ENSP00000367250)->299(ENSP00000415765),(-)alt-coding	(+)Per1-IPR007217,(+)TOPO_DOM-Lumenal,(-)Per1-IPR007217,(-)TOPO_DOM-Cytoplasmic,(-)TOPO_DOM-Lumenal,(-)TRANSMEM-Helical;	(direct)TOPO_DOM-Lumenal-UniProt, (direct)TRANSMEM-Helical-UniProt, (direct)Per1-IPR007217	GPI anchor metabolic process // GPI anchor biosynthetic process // hydrolase activity, acting on ester bonds // Golgi membrane // integral to membrane // intrinsic to endoplasmic reticulum membrane	0.386824	cassetteExon|mutually-exclusive-exon	E4-4	TC17001453.hg	5
ENSG00000006576	0.201354		PHTF2	ENSG00000006576	putative homeodomain transcription factor 2 [Source:HGNC Symbol;Acc:13411]	downregulated	ei-ex	1	1		E17.1	(-)AA:190(ENST00000470215-PEP)->747(ENSP00000307699),(-)alt-N-terminus	(-)TF_homeodomain_male-IPR021980		transcription, DNA-dependent // regulation of transcription, DNA-dependent // DNA binding // nucleus // endoplasmic reticulum	0.145145	cassette-exon	E17-1	TC07000498.hg	3
ENSG00000163964	0.247905		PIGX	ENSG00000163964	phosphatidylinositol glycan anchor biosynthesis, class X [Source:HGNC Symbol;Acc:26046]	downregulated	ei-ex	1	1		E7.1	(+)AA:48(ENST00000495440-PEP)->63(ENSP00000393424),(+)alt-C-terminus,(+)alt-N-terminus,(+)nonsense_mediated_decay	(+)PIG-X/PBN1-IPR013233,(+)TOPO_DOM-Cytoplasmic,(+)TRANSMEM-Helical;	(indirect)TOPO_DOM-Lumenal-UniProt	C-terminal protein lipidation // GPI anchor biosynthetic process // preassembly of GPI anchor in ER membrane // post-translational protein modification // cellular protein metabolic process // endoplasmic reticulum membrane // integral to membrane	0.301393	mutually-exclusive-exon	E7-1	TC03003368.hg	3
ENSG00000107242	0.224656		PIP5K1B	ENSG00000107242	phosphatidylinositol-4-phosphate 5-kinase, type I, beta [Source:HGNC Symbol;Acc:8995]	upregulated	ei-ex	1	1	E24.1		(+)AA:502(ENSP00000438082)->549(ENSP00000435778),(+)alt-C-terminus,(+)microRNA-target(hsa-miR-155:miRanda),(+)nonsense_mediated_decay			B Cell Receptor Signaling Pathway:WP23 // Regulation of Actin Cytoskeleton:WP51 // Wnt Signaling Pathway Netpath:WP363 // phospholipid metabolic process // phosphatidylinositol biosynthetic process // phosphorylation // small molecule metabolic process // phosphatidylinositol metabolic process // protein binding // ATP binding // phosphatidylinositol phosphate kinase activity // 1-phosphatidylino…	0.180611	cassette-exon|cassetteExon	E24-1	TC09000316.hg	5
ENSG00000075651	0.217295		PLD1	ENSG00000075651	phospholipase D1, phosphatidylcholine-specific [Source:HGNC Symbol;Acc:9067]	downregulated	ei-ex	1	1		E31.1_171362829	(-)AA:202(ENST00000471075-PEP)->228(ENST00000465816-PEP),(-)alt-C-terminus,(-)alt-N-terminus,(-)retained_intron	(-)DOMAIN-PLD phosphodiesterase 2,(-)PLipase_D/transphosphatidylase-IPR001736	(direct)REGION-Catalytic-UniProt, (direct)PLipase_D_euk-IPR016555	EGF/EGFR Signaling Pathway:WP437 // TSH signaling pathway:WP2032 // phospholipid metabolic process // phosphatidic acid biosynthetic process // phosphatidylglycerol biosynthetic process // chemotaxis // cell communication // small GTPase mediated signal transduction // Ras protein signal transduction // metabolic process // lipid catabolic process // small molecule metabolic process // glyceropho…	0.026452	alt-C-term	E31-1	TC03002001.hg	3
ENSG00000052126	0.265646		PLEKHA5	ENSG00000052126	pleckstrin homology domain containing, family A member 5 [Source:HGNC Symbol;Acc:30036]	upregulated	ei-ex	3	3	E21.1,E22.1,E23.2		(+)AA:1174(ENSP00000347560)->1179(ENSP00000325155),(+)alt-coding,(-)AA:1098(ENSP00000439837)->1179(ENSP00000325155),(-)AA:1174(ENSP00000347560)->1179(ENSP00000325155),(-)alt-N-terminus,(-)alt-coding	(-)DOMAIN-WW 1,(-)DOMAIN-WW 2,(-)WW_dom-IPR001202		biological_process // protein binding // phospholipid binding // 1-phosphatidylinositol binding // cellular_component // cytoplasm	-0.779142	alt-C-term, cassette-exon|cassetteExon	E21-1|E22-1|E23-2	TC12000219.hg	5
ENSG00000152527	0.240768		PLEKHH2	ENSG00000152527	pleckstrin homology domain containing, family H (with MyTH4 domain) member 2 [Source:HGNC Symbol;Acc:30506]	upregulated	ei-ex	2	2	E24.4,E5.1		(+)microRNA-target(hsa-miR-200b:miRanda,hsa-miR-200c:miRanda,hsa-miR-379:miRanda,hsa-miR-411:miRanda,hsa-miR-429:miRanda,hsa-miR-487b:miRanda),(+)truncated,(-)AA:755(ENST00000405000-PEP)->1493(ENSP00000282406),(-)AA:89(ENSP00000427746)->610(AK126308-PEP),(-)alt-C-terminus,(-)alt-N-terminus,(-)nonsense_mediated_decay,(-)retained_intron	(-)Band_41_domain-IPR019749,(-)COILED,(-)COMPBIAS-Poly-Ser,(-)DOMAIN-FERM,(-)DOMAIN-MyTH4,(-)DOMAIN-PH 1,(-)DOMAIN-PH 2,(-)FERM_central-IPR019748,(-)FERM_domain-IPR000299,(-)MyTH4_dom-IPR000857,(-)Pleckstrin_homology-IPR001849	(indirect)COILED--UniProt	negative regulation of actin filament depolymerization // actin binding // protein binding // phospholipid binding // identical protein binding // cytoplasm // cytoskeleton // plasma membrane // lamellipodium // cortical actin cytoskeleton	-0.618061	alt-5'|bleedingExon, cassette-exon	E24-4|E5-1	TC02000270.hg	5
ENSG00000142731	0.384255		PLK4	ENSG00000142731	polo-like kinase 4 [Source:HGNC Symbol;Acc:11397]	downregulated	ei-ex	2	1		E9.1	(-)AA:198(ENSP00000427568)->938(ENSP00000427554),(-)alt-C-terminus,(-)alt-N-terminus	(-)ACT_SITE-Proton acceptor,(-)DOMAIN-POLO box,(-)HELIX,(-)Kinase-like_dom-IPR011009,(-)MOD_RES-Phosphoserine,(-)NP_BIND-ATP,(-)POLO_box_duplicated_dom-IPR000959,(-)Prot_kinase_cat_dom-IPR000719,(-)STRAND,(-)Ser-Thr/Tyr_kinase_cat_dom-IPR001245,(-)Ser/Thr_dual-sp_kinase_dom-IPR002290,(-)TURN,(-)Tyr_kinase_cat_dom-IPR020635		G2/M transition of mitotic cell cycle // mitotic cell cycle // protein phosphorylation // centriole replication // positive regulation of centriole replication // trophoblast giant cell differentiation // protein kinase activity // protein serine/threonine kinase activity // protein tyrosine kinase activity // protein binding // ATP binding // transferase activity, transferring phosphorus-contain…	-0.322458	cassette-exon	E9-1	TC04000645.hg	3
ENSG00000101346	0.222274		POFUT1	ENSG00000101346	protein O-fucosyltransferase 1 [Source:HGNC Symbol;Acc:14988]	downregulated	ei-ex	1	1		E5.1	(-)AA:250(ENST00000486717-PEP)->388(ENSP00000364902),(-)alt-C-terminus,(-)alt-N-terminus,(-)microRNA-target(hsa-miR-106a:miRanda|mirbase,hsa-miR-106b:miRanda|mirbase,hsa-miR-128:TargetScan|miRanda,hsa-miR-132:miRanda,hsa-miR-135a:miRanda,hsa-miR-135b:miRanda,hsa-miR-138:miRanda,hsa-miR-141:miRanda|mirbase,hsa-miR-145:miRanda,hsa-miR-149:miRanda,hsa-miR-17:miRanda|mirbase,hsa-miR-195*:mirbase,hsa-…	(-)DISULFID,(-)GDP-Fuc_O-FucTrfase-IPR019378,(-)MOTIF-Prevents secretion from ER,(-)REGION-Substrate binding,(-)SIGNAL	(direct)GDP-Fuc_O-FucTrfase-IPR019378	angiogenesis // somitogenesis // fucose metabolic process // regulation of transcription, DNA-dependent // protein O-linked glycosylation // Notch signaling pathway // nervous system development // heart development // embryo development // O-glycan processing // fucosyltransferase activity // transferase activity, transferring glycosyl groups // peptide-O-fucosyltransferase activity // endoplasm…	0.760391	altFinish|cassette-exon	E5-1	TC20000208.hg	3
ENSG00000163644	0.251512		PPM1K	ENSG00000163644	protein phosphatase, Mg2+/Mn2+ dependent, 1K [Source:HGNC Symbol;Acc:25415]	downregulated	ei-ex	3	3		E1.6,E4.2_89198411,E4.2_89198411|E1.6	(+)AA:153(ENST00000508256-PEP)->372(ENSP00000295908),(+)alt-N-terminus	(+)DOMAIN-PP2C-like,(+)HELIX,(+)METAL-Magnesium,(+)METAL-Magnesium; via carbonyl oxygen,(+)PP2C-like-IPR001932,(+)STRAND,(+)TRANSIT-Mitochondrion,(+)TURN	(direct)PP2C-like-IPR001932, (direct)DOMAIN-PP2C-like-UniProt, (direct)HELIX-UniProt	protein dephosphorylation // catalytic activity // protein serine/threonine phosphatase activity // metal ion binding // mitochondrion // mitochondrial matrix	-0.229914	alt-C-term, exon-region-exclusion|exon-region-exclusion	E1-6|E4-1|E4-2	TC04001373.hg	3
ENSG00000077157	0.228487		PPP1R12B	ENSG00000077157	protein phosphatase 1, regulatory subunit 12B [Source:HGNC Symbol;Acc:7619]	downregulated	ei-ex	1	1		E14.1	(-)AA:208(ENSP00000375821)->982(ENSP00000384496),(-)alt-N-terminus	(-)Ankyrin_rpt-IPR002110,(-)Ankyrin_rpt-contain_dom-IPR020683,(-)COMPBIAS-Glu-rich,(-)Pase-1_reg_su_12A/B/C_euk-IPR017401,(-)REPEAT-ANK 1,(-)REPEAT-ANK 2,(-)REPEAT-ANK 3,(-)REPEAT-ANK 4,(-)REPEAT-ANK 5	(indirect)Pase-1_reg_su_12A/B/C_euk-IPR017401	G2/M transition of mitotic cell cycle // mitotic cell cycle // regulation of muscle contraction // signal transduction // positive regulation of catalytic activity // protein binding // enzyme activator activity // nucleoplasm // cytoplasm // plasma membrane // actin cytoskeleton	-0.109835	cassette-exon	E14-1	TC01001675.hg	3
ENSG00000105568	0.215929		PPP2R1A	ENSG00000105568	protein phosphatase 2, regulatory subunit A, alpha [Source:HGNC Symbol;Acc:9302]	downregulated	ei-ex	1	1		E4.2	(-)AA:410(ENSP00000470504)->589(ENSP00000324804),(-)alt-N-terminus	(-)ARM-type_fold-IPR016024,(-)HEAT-IPR000357,(-)HEAT_type_2-IPR021133,(-)HELIX,(-)REGION-PP2A subunit B binding,(-)REGION-Polyoma small and medium T antigens Binding,(-)REGION-SV40 small T antigen binding,(-)REPEAT-HEAT 1,(-)REPEAT-HEAT 2,(-)REPEAT-HEAT 3,(-)REPEAT-HEAT 4,(-)REPEAT-HEAT 5,(-)STRAND,(-)TURN		Wnt Signaling Pathway and Pluripotency:WP399 // Glycogen Metabolism:WP500 // G2/M transition of mitotic cell cycle // M phase of mitotic cell cycle // mitotic anaphase // nuclear-transcribed mRNA catabolic process, nonsense-mediated decay // inactivation of MAPK activity // mitotic cell cycle // regulation of DNA replication // regulation of transcription, DNA-dependent // protein complex assembl…	0.396178	alt-N-term	E4-2	TC19000792.hg	3
ENSG00000119383	0.256025		PPP2R4	ENSG00000119383	protein phosphatase 2A activator, regulatory subunit 4 [Source:HGNC Symbol;Acc:9308]	downregulated	ei-ex	3	2		E18.4,E18.5	(-)AA:61(ENSP00000408316)->61(ENSP00000387726),(-)AA:61(ENSP00000408726)->61(ENSP00000408316)			Wnt Signaling Pathway and Pluripotency:WP399 // miR-targeted genes in leukocytes - TarBase:WP2003 // Glycogen Metabolism:WP500 // miR-targeted genes in muscle cell - TarBase:WP2005 // Interleukin-11 Signaling Pathway:WP2332 // miR-targeted genes in lymphocytes - TarBase:WP2004 // miR-targeted genes in epithelium - TarBase:WP2002 // protein peptidyl-prolyl isomerization // ATP catabolic process //…	0.737827	alt-5'|cassette-exon, alt-N-term	E18-3|E18-4|E18-5	TC09000709.hg	3
ENSG00000107758	0.322103		PPP3CB	ENSG00000107758	protein phosphatase 3, catalytic subunit, beta isozyme [Source:HGNC Symbol;Acc:9315]	upregulated	ei-ex	2	2	E16.2,E18.1_75198194		(-)AA:515(ENSP00000378305)->525(ENSP00000378306),(-)alt-coding		(direct)REGION-Calmodulin-binding-UniProt	Physiological and Pathological Hypertrophy of the Heart:WP1528 // MicroRNAs in cardiomyocyte hypertrophy:WP1544 // MAPK Signaling Pathway:WP382 // Alzheimers Disease:WP2059 // Amyotrophic lateral sclerosis (ALS):WP2447 // negative regulation of T cell mediated cytotoxicity // protein phosphorylation // protein dephosphorylation // signal transduction // heart development // learning // memory // …	0.0831117	bleedingExon	E16-2|E16-3|E18-1	TC10001410.hg	4
ENSG00000162976	0.28435		PQLC3	ENSG00000162976	PQ loop repeat containing 3 [Source:HGNC Symbol;Acc:28503]	downregulated	ei-ex	4	4	E8.1|E6.3	E7.1,E7.1|E8.1,E8.1	(+)AA:120(ENSP00000384129)->188(ENSP00000406148),(+)AA:169(ENSP00000406587)->188(ENSP00000406148),(+)AA:188(ENSP00000406148)->202(ENSP00000295083),(+)alt-C-terminus,(+)alt-coding,(+)nonsense_mediated_decay	(+)MannP-dilichol_defect-1-IPR016817,(+)TRANSMEM-Helical;,(-)MannP-dilichol_defect-1-IPR016817,(-)TRANSMEM-Helical;	(direct)TRANSMEM-Helical-UniProt, (indirect)MannP-dilichol_defect-1-IPR016817, (direct)MannP-dilichol_defect-1-IPR016817	integral to membrane	0.468325	cassette-exon, cassetteExon|mutually-exclusive-exon, mutually-exclusive-exon	E6-3|E7-1|E8-1	TC02000069.hg	5
ENSG00000205352	0.228062		PRR13	ENSG00000205352	proline rich 13 [Source:HGNC Symbol;Acc:24528]	downregulated	ei-ex	1	1		E3.5	(-)AA:52(ENSP00000450334)->58(ENSP00000449513),(-)alt-C-terminus	(+)COMPBIAS-His-rich,(+)COMPBIAS-Ser-rich	(direct)COMPBIAS-His-rich-UniProt	transcription, DNA-dependent // regulation of transcription, DNA-dependent // nucleolus	0.124854	alt-3'	E3-5	TC12003241.hg	3
ENSG00000204576	0.327165		PRR3	ENSG00000204576	proline rich 3 [Source:HGNC Symbol;Acc:21149]	downregulated	ei-ex	4	2		E3.2,E3.2|E2.1	(+)AA:107(ENST00000498336-PEP)->167(ENSP00000365740),(+)AA:107(ENST00000498336-PEP)->188(ENSP00000365744),(+)AA:167(ENSP00000365740)->188(ENSP00000365744),(+)alt-C-terminus,(+)alt-N-terminus,(+)alt-coding,(-)AA:107(ENST00000498336-PEP)->188(ENSP00000365744),(-)alt-C-terminus,(-)alt-N-terminus	(+)COMPBIAS-Pro-rich,(+)ZN_FING-C3H1-type,(+)Znf_CCCH-IPR000571,(-)COMPBIAS-Pro-rich,(-)ZN_FING-C3H1-type,(-)Znf_CCCH-IPR000571	(direct)COMPBIAS-Pro-rich-UniProt	nucleic acid binding // zinc ion binding	0.697243	alt-3'|mutually-exclusive-exon, cassetteExon|mutually-exclusive-exon	E2-1|E3-2	TC06000340.hg	5
ENSG00000143363	0.201729		PRUNE	ENSG00000143363	prune exopolyphosphatase [Source:HGNC Symbol;Acc:13420]	upregulated	ei-ex	1	1	E3.1|E4.2		(+)AA:218(ENSP00000357933)->284(ENST00000467771-PEP),(+)alt-C-terminus,(+)alt-N-terminus	(+)DHHA2-IPR004097,(+)METAL-Manganese 1,(+)METAL-Manganese 2,(+)MOTIF-DHH motif,(-)REGION-Essential for homodimerization	(direct)Pesterase_RecJ-IPR001667	inorganic diphosphatase activity // protein binding // pyrophosphatase activity // hydrolase activity // manganese ion binding // nucleus // cytoplasm // focal adhesion	0.805282	mutually-exclusive-exon	E3-1	TC01001198.hg	3
ENSG00000117569	0.236018		PTBP2	ENSG00000117569	polypyrimidine tract binding protein 2 [Source:HGNC Symbol;Acc:17662]	upregulated	ei-ex	1	1	E12.1		(+)AA:356(ENST00000476419-PEP)->531(ENSP00000412788),(+)alt-C-terminus	(+)DOMAIN-RRM 3,(+)DOMAIN-RRM 4,(+)HnRNP-L_PTB-IPR006536,(+)RRM_dom-IPR000504	(direct)HnRNP-L_PTB-IPR006536, (direct)RRM_dom-IPR000504, (direct)DOMAIN-RRM 3-UniProt	TarBasePathway:WP1992 // miR-targeted genes in muscle cell - TarBase:WP2005 // mRNA Processing:WP411 // miR-targeted genes in lymphocytes - TarBase:WP2004 // mRNA splice site selection // mRNA processing // negative regulation of RNA splicing // regulation of neural precursor cell proliferation // nucleotide binding // nucleic acid binding // RNA binding // mRNA binding // protein binding // nucl…	0.643717	cassette-exon|cassetteExon	E12-1	TC01000883.hg	5
ENSG00000072135	0.236034		PTPN18	ENSG00000072135	protein tyrosine phosphatase, non-receptor type 18 (brain-derived) [Source:HGNC Symbol;Acc:9649]	upregulated	ei-ex	1	1	E6.1		(+)AA:353(ENSP00000310092)->460(ENSP00000175756),(+)alt-coding	(+)DOMAIN-Tyrosine-protein phosphatase,(+)HELIX,(+)STRAND,(+)TURN,(+)Tyr_Pase_rcpt/non-rcpt-IPR000242,(-)Tyr_Pase_rcpt/non-rcpt-IPR000242		B Cell Receptor Signaling Pathway:WP23 // protein dephosphorylation // dephosphorylation // protein tyrosine phosphatase activity // non-membrane spanning protein tyrosine phosphatase activity // protein binding // phosphatase activity // nucleus // cytoplasm	0.402687	alt-N-term	E6-1	TC02000809.hg	3
ENSG00000168297	0.216052		PXK	ENSG00000168297	PX domain containing serine/threonine kinase [Source:HGNC Symbol;Acc:23326]	upregulated	ei-ex	1	1	E21.2		(+)AA:312(ENSP00000418202)->482(ENSP00000417903),(+)alt-C-terminus,(+)alt-N-terminus	(+)DOMAIN-Protein kinase,(+)Kinase-like_dom-IPR011009,(+)Phox-IPR001683,(+)Prot_kinase_cat_dom-IPR000719,(+)Ser-Thr/Tyr_kinase_cat_dom-IPR001245,(-)DOMAIN-WH2,(-)WH2_dom-IPR003124		protein phosphorylation // inflammatory response // cell communication // negative regulation of ATPase activity // negative regulation of ion transport // regulation of synaptic transmission // actin binding // protein kinase activity // protein binding // ATP binding // protein C-terminus binding // transferase activity, transferring phosphorus-containing groups // phosphatidylinositol binding …	0.0354117	cassetteExon|mutually-exclusive-exon	E21-2	TC03000378.hg	5
ENSG00000163564	0.201365		PYHIN1	ENSG00000163564	pyrin and HIN domain family, member 1 [Source:HGNC Symbol;Acc:28894]	upregulated	ei-ex	1	1	E6.1		(+)microRNA-target(hsa-miR-106a:mirbase,hsa-miR-106b:mirbase,hsa-miR-143*:mirbase,hsa-miR-154*:mirbase,hsa-miR-17:mirbase,hsa-miR-185:mirbase,hsa-miR-196a:mirbase,hsa-miR-20a:mirbase,hsa-miR-20b:mirbase,hsa-miR-372:mirbase,hsa-miR-373:mirbase,hsa-miR-378*:mirbase,hsa-miR-384:miRanda|mirbase,hsa-miR-659:mirbase,hsa-miR-93:mirbase,hsa-miR-936:mirbase,hsa-miR-125a-3p:miRanda,hsa-miR-125a-5p:miRanda,…	(-)DOMAIN-HIN-200,(-)HIN200/IF120x-IPR004021		cell cycle // nuclear speck	-0.392874	alt-C-term	E6-1	TC01001347.hg	3
ENSG00000172053	0.209152		QARS	ENSG00000172053	glutaminyl-tRNA synthetase [Source:HGNC Symbol;Acc:9751]	upregulated	ei-ex	2	2	E16.11	E18.1_49133528	(-)AA:48(ENST00000497635-PEP)->90(ENST00000494984-PEP),(-)retained_intron		(direct)Gln-tRNA-synth_Ib-IPR004514, (direct)Ribosomal_L25/Gln-tRNA_synth-IPR011035, (direct)Glu/Gln-tRNA-synth_Ib_codon-bd-IPR020059	translation // tRNA aminoacylation for protein translation // glutaminyl-tRNA aminoacylation // gene expression // tRNA aminoacylation // nucleotide binding // aminoacyl-tRNA ligase activity // glutamine-tRNA ligase activity // ATP binding // ligase activity, forming aminoacyl-tRNA and related compounds // cytoplasm // mitochondrial matrix // cytosol	-0.290567	alt-5'|exon-region-exclusion|exon-region-exclusion	E16-11|E16-12|E18-1	TC03001400.hg	3
ENSG00000048991	0.232064		R3HDM1	ENSG00000048991	R3H domain containing 1 [Source:HGNC Symbol;Acc:9757]	upregulated	ei-ex	1	1	E9.2		(-)AA:43(ENST00000480793-PEP)->97(ENST00000488035-PEP),(-)alt-C-terminus,(-)alt-N-terminus	(-)DOMAIN-R3H,(-)R3H_ss-bd-IPR001374		nucleic acid binding	0.0198583	cassette-exon	E9-2	TC02000881.hg	3
ENSG00000127328	0.204623		RAB3IP	ENSG00000127328	RAB3A interacting protein [Source:HGNC Symbol;Acc:16508]	upregulated	ei-ex	1	1	E6.3		(+)AA:254(ENSP00000448773)->460(ENSP00000247833),(+)alt-N-terminus	(+)COILED,(+)MOD_RES-Phosphoserine,(+)Sec2p-IPR009449		Golgi to plasma membrane transport // protein transport // protein localization to organelle // cilium assembly // protein binding // Rab guanyl-nucleotide exchange factor activity // nucleus // centrosome // cytosol // cytoskeleton // microtubule basal body // lamellipodium	0.172175	alt-5'|cassette-exon	E6-3	TC12003251.hg	3
ENSG00000136933	0.247666		RABEPK	ENSG00000136933	Rab9 effector protein with kelch motifs [Source:HGNC Symbol;Acc:16896]	downregulated	ei-ex	2	2	E6.1	E7.1	(+)AA:154(ENSP00000377682)->372(ENSP00000377683),(+)AA:321(ENSP00000259460)->372(ENSP00000377683),(+)alt-coding,(-)truncated	(+)Kelch_1-IPR006652,(+)Kelch_2-IPR011498,(+)REPEAT-Kelch 1,(+)REPEAT-Kelch 2,(+)REPEAT-Kelch 3,(+)REPEAT-Kelch 4,(+)REPEAT-Kelch 5,(-)Kelch_2-IPR011498	(indirect)REPEAT-Kelch 2-UniProt, (indirect)Kelch_2-IPR011498	receptor-mediated endocytosis // vesicle docking involved in exocytosis // protein binding // endosome // plasma membrane // endosome membrane // intracellular membrane-bounded organelle	0.0639427	cassette-exon|cassetteExon	E6-1|E7-1	TC09000647.hg	5
ENSG00000011454	0.253322		RABGAP1	ENSG00000011454	RAB GTPase activating protein 1 [Source:HGNC Symbol;Acc:17155]	downregulated	ei-ex	1	1		E5.1|E6.1	(-)AA:66(ENSP00000416327)->599(ENSP00000414386),(-)alt-C-terminus,(-)alt-N-terminus,(-)nonsense_mediated_decay	(-)DOMAIN-PID,(-)Kinesin-like-IPR022164,(-)PTyr_interaction_dom-IPR006020,(-)Rab-GTPase-TBC_dom-IPR000195		cell cycle // regulation of Rab GTPase activity // positive regulation of GTPase activity // DNA binding // GTPase activator activity // Rab GTPase activator activity // protein binding // tubulin binding // intracellular // centrosome // cytosol // microtubule associated complex	-0.499293	cassette-exon|cassetteExon	E5-1	TC09000627.hg	5
ENSG00000116473	0.206557		RAP1A	ENSG00000116473	RAP1A, member of RAS oncogene family [Source:HGNC Symbol;Acc:9855]	downregulated	ei-ex	1	1		E10.1	(+)AA:159(ENST00000494982-PEP)->184(ENSP00000348786),(+)alt-C-terminus,(-)microRNA-target(hsa-miR-15a:miRanda,hsa-miR-15b:miRanda,hsa-miR-16:miRanda,hsa-miR-195:miRanda,hsa-miR-374a:miRanda,hsa-miR-374b:miRanda,hsa-miR-424:miRanda,hsa-miR-497:miRanda)	(+)EF_GTP-bd_dom-IPR000795,(+)HELIX,(+)LIPID-S-geranylgeranyl cysteine,(+)MOD_RES-Cysteine methyl ester,(+)P-loop_NTPase-IPR027417,(+)PROPEP-Removed in mature form,(+)Ran_GTPase-IPR002041,(+)Small_GTP-bd_dom-IPR005225,(+)Small_GTPase-IPR001806,(+)Small_GTPase_Rab_type-IPR003579,(+)Small_GTPase_Ras-IPR020849,(+)Small_GTPase_Rho-IPR003578	(indirect)HELIX--UniProt	BDNF signaling pathway:WP2380 // Serotonin Receptor 4/6/7 and NR3C Signaling:WP734 // Focal Adhesion:WP306 // Integrated Pancreatic Cancer Pathway:WP2377 // MAPK Signaling Pathway:WP382 // EGF/EGFR Signaling Pathway:WP437 // Interferon type I:WP585 // Integrin-mediated Cell Adhesion:WP185 // TSH signaling pathway:WP2032 // Signaling of Hepatocyte Growth Factor Receptor:WP313 // Integrated Breast …	0.22776	cassette-exon	E10-1	TC01000979.hg	3
ENSG00000188739	0.216527		RBM34	ENSG00000188739	RNA binding motif protein 34 [Source:HGNC Symbol;Acc:28965]	upregulated	ei-ex	1	1	E2.3		(-)AA:86(ENSP00000420236)->425(AAH29451.1),(-)alt-C-terminus,(-)alt-N-terminus,(-)nonsense_mediated_decay	(-)DOMAIN-RRM 1,(-)DOMAIN-RRM 2,(-)MOD_RES-Phosphoserine,(-)RRM_dom-IPR000504		nucleotide binding // nucleic acid binding // RNA binding // nucleus // nucleolus	-0.31824	exon-region-exclusion|exon-region-exclusion	E2-3|E2-4	TC01006388.hg	3
ENSG00000131051	0.235263		RBM39	ENSG00000131051	RNA binding motif protein 39 [Source:HGNC Symbol;Acc:15923]	upregulated	ei-ex	2	2	E4.4,E5.8_34326955		(+)AA:40(ENSP00000385977)->530(ENSP00000253363),(+)AA:43(ENST00000463098-PEP)->95(ENSP00000380527),(+)alt-C-terminus,(+)alt-N-terminus,(+)nonsense_mediated_decay,(-)truncated	(+)CC1_SF-IPR006509,(+)COMPBIAS-Arg/Ser-rich (RS domain),(+)COMPBIAS-Poly-Ala,(+)DOMAIN-RRM 1,(+)DOMAIN-RRM 2,(+)DOMAIN-RRM 3,(+)HELIX,(+)MOD_RES-Phosphoserine,(+)MOD_RES-Phosphothreonine,(+)MOD_RES-Phosphotyrosine,(+)REGION-Activating domain,(+)REGION-Interaction with ESR1 and ESR2,(+)REGION-Interaction with JUN,(+)REGION-Interaction with NCOA6,(+)RRM_dom-IPR000504,(+)RRM_dom_euk-IPR003954,(+)ST…	(direct)INIT_MET-Removed-UniProt	mRNA Processing:WP411 // transcription, DNA-dependent // regulation of transcription, DNA-dependent // RNA processing // mRNA processing // RNA splicing // nucleotide binding // nucleic acid binding // RNA binding // protein binding // nucleus // nucleoplasm // centrosome // microtubule cytoskeleton // nuclear speck	0.14721	exon-region-exclusion|exon-region-exclusion|retainedIntron	E4-4|E4-5|E5-7|E5-8	TC20000805.hg	5
ENSG00000004534	0.237107		RBM6	ENSG00000004534	RNA binding motif protein 6 [Source:HGNC Symbol;Acc:9903]	upregulated	ei-ex	1	1	E26.1		(+)AA:119(ENSP00000392475)->333(BC030057-PEP),(+)alt-N-terminus	(+)COMPBIAS-Poly-Glu,(+)COMPBIAS-Poly-Pro,(+)MOD_RES-Phosphoserine		RNA processing // nucleotide binding // nucleic acid binding // DNA binding // RNA binding // nucleus	-0.471694	alt-3'|cassette-exon	E26-1	TC03003351.hg	3
ENSG00000189056	0.223808		RELN	ENSG00000189056	reelin [Source:HGNC Symbol;Acc:9957]	upregulated	ei-ex	1	1	E65.2		(-)AA:3458(ENSP00000345694)->3460(ENSP00000392423),(-)alt-coding			Focal Adhesion:WP306 // cell morphogenesis involved in differentiation // neuron migration // proteolysis // cell adhesion // axon guidance // central nervous system development // brain development // long-term memory // associative learning // glial cell differentiation // regulation of gene expression // positive regulation of neuron projection development // positive regulation of phosphatidy…	-0.06623		E65-2	TC07001722.hg	2
ENSG00000111445	0.26409		RFC5	ENSG00000111445	replication factor C (activator 1) 5, 36.5kDa [Source:HGNC Symbol;Acc:9973]	downregulated	ei-ex	1	1		E3.4			(indirect)P-loop_NTPase-IPR027417, (indirect)DUF815-IPR008533	DNA Replication:WP466 // cell cycle checkpoint // S phase of mitotic cell cycle // mitotic cell cycle // telomere maintenance via recombination // telomere maintenance // DNA replication // DNA strand elongation involved in DNA replication // DNA repair // transcription-coupled nucleotide-excision repair // nucleotide-excision repair // nucleotide-excision repair, DNA gap filling // DNA recombina…	-0.148607	alt-5'|cassette-exon|altFivePrime|cassetteExon	E3-4	TC12000925.hg	5
ENSG00000144468	0.204386		RHBDD1	ENSG00000144468	rhomboid domain containing 1 [Source:HGNC Symbol;Acc:23081]	upregulated	ei-ex	1	1	E5.3		(+)AA:315(ENSP00000344779)->315(ENSP00000375914)	(-)Peptidase_S54_rhomboid_dom-IPR022764,(-)TOPO_DOM-Extracellular		apoptosis // positive regulation of protein maturation by peptide bond cleavage // ER-associated protein catabolic process // membrane protein intracellular domain proteolysis // membrane protein proteolysis // cellular response to unfolded protein // cellular response to UV // negative regulation of apoptosis // post-translational protein modification // positive regulation of protein catabolic …	0.282719	cassetteExon|mutually-exclusive-exon	E5-2|E5-3	TC02001359.hg	5
ENSG00000013561	0.248531		RNF14	ENSG00000013561	ring finger protein 14 [Source:HGNC Symbol;Acc:10058]	downregulated	ei-ex	1	1		E8.3|E10.1	(-)AA:153(ENSP00000426832)->298(ENSP00000378023),(-)alt-C-terminus	(+)UBQ-conjugating_enzyme/RWD-IPR016135,(-)COILED,(-)MOD_RES-Phosphoserine,(-)REGION-Interaction with androgen receptor,(-)RWD-domain-IPR006575,(-)UBQ-conjugating_enzyme/RWD-IPR016135,(-)ZN_FING-IBR-type,(-)Znf_C6HC-IPR002867	(direct)COILED-UniProt, (direct)DOMAIN-RWD-UniProt, (direct)UBQ-conjugating_enzyme/RWD-IPR016135, (direct)ZN_FING-IBR-type-UniProt, (direct)RWD-domain-IPR006575	Androgen receptor signaling pathway:WP138 // transcription, DNA-dependent // regulation of transcription, DNA-dependent // regulation of transcription from RNA polymerase II promoter // signal transduction // protein ubiquitination // androgen receptor signaling pathway // response to estradiol stimulus // positive regulation of transcription, DNA-dependent // regulation of androgen receptor sign…	-0.165822	cassetteExon|mutually-exclusive-exon	E8-2|E8-3	TC05000776.hg	5
ENSG00000214940	0.22598		RP11-1212A22.2	ENSG00000214940	Uncharacterized protein [Source:UniProtKB/TrEMBL;Acc:E9PJI5]	downregulated	ei-ex	1	1		E22.1_18426413	(+)AA:153(ENSP00000445812)->369(ENSP00000435325),(+)alt-N-terminus	(+)NPIP-IPR009443	(indirect)NPIP-IPR009443		0.0951752	mutually-exclusive-exon	E22-1	TC16002097.hg	3
ENSG00000259280	0.252004		RP11-122D10.1	ENSG00000259280		upregulated	ei-ex	1	1	E4.2		(+)AA:90(BC133673-PEP)->90(AK023254-PEP)				-0.178143		E4-2|E4-3	TC15001210.hg	2
ENSG00000258422	0.210778		RP11-486O13.2	ENSG00000258422		downregulated	ei-ex	1	1		E6.1	(+)AA:39(ENST00000555198-PEP)->61(ENST00000554008-PEP),(+)alt-C-terminus,(+)alt-N-terminus				0.130866	cassette-exon	E6-1	TC14000420.hg	3
ENSG00000248809	0.216859		RP11-6L6.3	ENSG00000248809		upregulated	ei-ex	1	1	E8.1_147031034						-0.00143	alt-C-term	E8-1	TC04001619.hg	3
ENSG00000156482	0.254877		RPL30	ENSG00000156482	ribosomal protein L30 [Source:HGNC Symbol;Acc:10333]	upregulated	ei-ex	1	1	E2.11		(+)AA:56(ENSP00000430556)->90(ENST00000518164-PEP),(+)alt-C-terminus,(+)nonsense_mediated_decay		(direct)Ribosomal_L7Ae/L30e/S12e/Gad45-IPR004038	Selenium Metabolism and Selenoproteins:WP28 // Cytoplasmic Ribosomal Proteins:WP477 // nuclear-transcribed mRNA catabolic process, nonsense-mediated decay // translation // translational initiation // translational elongation // translational termination // SRP-dependent cotranslational protein targeting to membrane // gene expression // viral reproduction // RNA metabolic process // mRNA metabol…	0.0594958	alt-N-term|alt-5'	E2-11|E2-12	TC08001458.hg	3
ENSG00000148688	0.344103		RPP30	ENSG00000148688	ribonuclease P/MRP 30kDa subunit [Source:HGNC Symbol;Acc:17688]	upregulated	ei-ex	3	2	E10.2	E9.1	(+)AA:38(ENST00000466462-PEP)->212(ENSP00000407972),(+)alt-C-terminus,(+)alt-N-terminus,(-)AA:212(ENSP00000407972)->254(ENSP00000277882),(-)alt-C-terminus,(-)alt-N-terminus	(+)MOD_RES-Phosphoserine,(+)Pol/histidinol_Pase-like-IPR016195,(+)RNase_P_p30-IPR002738,(-)Pol/histidinol_Pase-like-IPR016195,(-)RNase_P_p30-IPR002738	(direct)Pol/histidinol_Pase-like-IPR016195, (direct)RNase_P_p30-IPR002738	tRNA processing // catalytic activity // ribonuclease P activity // ribonuclease activity // nucleus // nucleolar ribonuclease P complex	-0.161248	cassette-exon, mutually-exclusive-exon	E10-2|E9-1	TC10000648.hg	3
ENSG00000177189	0.272378		RPS6KA3	ENSG00000177189	ribosomal protein S6 kinase, 90kDa, polypeptide 3 [Source:HGNC Symbol;Acc:10432]	downregulated	ei-ex	4	3	E5.1_20252948	E1.2,E5.1_20252948|E1.2	(+)AA:158(ENST00000492128-PEP)->711(ENSP00000444837),(-)AA:133(ENSP00000388512)->158(ENST00000492128-PEP),(-)alt-C-terminus,(-)truncated	(+)ACT_SITE-Proton acceptor,(+)AGC-kinase_C-IPR000961,(+)BINDING-ATP,(+)DOMAIN-AGC-kinase C-terminal,(+)DOMAIN-Protein kinase 1,(+)DOMAIN-Protein kinase 2,(+)HELIX,(+)Kinase-like_dom-IPR011009,(+)LipoPS_kinase-IPR010440,(+)MOD_RES-Phosphoserine,(+)MOD_RES-Phosphoserine; by PDPK1 (Probable),(+)MOD_RES-Phosphoserine; by autocatalysis and MAPKAPK2,(+)MOD_RES-Phosphothreonine,(+)MOD_RES-Phosphotyrosi…	(direct)Ribosomal_S6_kinase_II-IPR016239	Insulin Signaling:WP481 // BDNF signaling pathway:WP2380 // MAPK Signaling Pathway:WP382 // EGF/EGFR Signaling Pathway:WP437 // Cytoplasmic Ribosomal Proteins:WP477 // Kit receptor signaling pathway:WP304 // skeletal system development // toll-like receptor signaling pathway // MyD88-dependent toll-like receptor signaling pathway // MyD88-independent toll-like receptor signaling pathway // protei…	-0.25367	alt-C-term, alt-N-term	E1-2|E5-1	TC0X000911.hg	3
ENSG00000048392	0.268445		RRM2B	ENSG00000048392	ribonucleotide reductase M2 B (TP53 inducible) [Source:HGNC Symbol;Acc:17296]	downregulated	ei-ex	2	1		E11.1_103220529|E1.3	(+)AA:66(ENSP00000429140)->139(ENSP00000430641),(+)AA:66(ENSP00000429140)->299(ENSP00000379248),(+)alt-coding	(+)ACT_SITE,(+)Ferritin-like_SF-IPR009078,(+)HELIX,(+)METAL-Iron 1,(+)METAL-Iron 2,(+)RNR_small-IPR000358,(+)STRAND,(+)TURN,(-)Ferritin-like_SF-IPR009078	(direct)Ferritin-like_SF-IPR009078, (direct)RNR_small-IPR000358	Nucleotide Metabolism:WP404 // miRNA Regulation of DNA Damage Response:WP1530 // DNA Damage Response:WP707 // kidney development // renal system process // mitochondrial DNA replication // DNA repair // response to oxidative stress // deoxyribonucleoside diphosphate metabolic process // deoxyribonucleoside triphosphate metabolic process // deoxyribonucleotide biosynthetic process // nucleobase, n…	0.661449		E11-1	TC08001496.hg	2
ENSG00000111011	0.267849		RSRC2	ENSG00000111011	arginine/serine-rich coiled-coil 2 [Source:HGNC Symbol;Acc:30559]	upregulated	ei-ex	4	4	E5.1,E8.1_123003614	E5.1|E5.2,E8.2_123003592	(+)AA:76(ENSP00000412148)->386(ENSP00000346678),(+)AA:76(ENSP00000436515)->386(ENSP00000346678),(+)alt-C-terminus,(+)alt-N-terminus,(+)nonsense_mediated_decay	(+)COILED,(+)MOD_RES-Phosphoserine,(-)MOD_RES-Phosphoserine,(-)MOD_RES-Phosphothreonine	(direct)COMPBIAS-Ser-rich-UniProt, (indirect)COMPBIAS-Ser-rich-UniProt		-0.331417	altFivePrime|exon-region-exclusion|exon-region-exclusion, altThreePrime|exon-region-exclusion|exon-region-exclusion	E5-1|E5-2|E8-1|E8-1|E8-2	TC12002076.hg	5
ENSG00000022277	0.240101		RTFDC1	ENSG00000022277	replication termination factor 2 domain containing 1 [Source:HGNC Symbol;Acc:15890]	downregulated	ei-ex	1	1		E2.1	(+)AA:42(ENSP00000407185)->277(ENSP00000400322),(-)microRNA-target(hsa-miR-138:miRanda),(-)truncated			biological_process // molecular_function // cellular_component	-0.422025	cassette-exon	E2-1	TC20001758.hg	3
ENSG00000018189	0.311862		RUFY3	ENSG00000018189	RUN and FYVE domain containing 3 [Source:HGNC Symbol;Acc:30285]	upregulated	ei-ex	2	2	E18.1	E19.2	(+)AA:453(ENSP00000443652)->567(ENSP00000425400),(+)alt-C-terminus,(+)alt-N-terminus,(-)AA:57(ENSP00000420980)->620(ENSP00000370394),(-)alt-C-terminus,(-)alt-N-terminus,(-)nonsense_mediated_decay	(+)Znf_FYVE-IPR000306,(+)Znf_FYVE_PHD-IPR011011,(-)COILED,(-)DOMAIN-RUN,(-)Run-IPR004012,(-)Znf_FYVE-IPR000306,(-)Znf_FYVE_PHD-IPR011011,(~)Prefoldin-IPR009053	(direct)COILED-UniProt, (direct)Prefoldin-IPR009053	negative regulation of axonogenesis // protein binding // metal ion binding // filopodium // growth cone	-0.478813	alt-C-term, cassette-exon	E18-1|E19-2	TC04000392.hg	3
ENSG00000160753	0.218274		RUSC1	ENSG00000160753	RUN and SH3 domain containing 1 [Source:HGNC Symbol;Acc:17153]	upregulated	ei-ex	1	1	E7.2		(-)AA:127(ENST00000471876-PEP)->433(ENSP00000292254),(-)alt-N-terminus	(-)DOMAIN-RUN,(-)HELIX,(-)REGION-Interaction with IKBKG,(-)REGION-Interaction with TRAF6,(-)Run-IPR004012,(-)STRAND,(-)TURN	(direct)DOMAIN-RUN-UniProt, (direct)REGION-Interaction with IKBKG-UniProt, (direct)HELIX-UniProt, (direct)Run-IPR004012	protein polyubiquitination // actin binding // SH3/SH2 adaptor activity // protein binding // nucleus // cytoplasm // early endosome // Golgi apparatus // microtubule // plasma membrane // postsynaptic density // microtubule cytoskeleton // cytoplasmic membrane-bounded vesicle // cell junction // cytoplasmic vesicle // postsynaptic membrane	0.59116	exon-region-exclusion|exon-region-exclusion	E7-2	TC01001300.hg	3
ENSG00000182552	0.22185		RWDD4	ENSG00000182552	RWD domain containing 4 [Source:HGNC Symbol;Acc:23750]	upregulated	ei-ex	2	2	E6.1	E8.2_184562637	(+)AA:187(ENSP00000332177)->188(ENSP00000388920),(+)alt-coding,(-)AA:187(ENSP00000332177)->188(ENSP00000388920),(-)alt-coding			protein binding	0.0211787		E6-1|E8-2	TC04001797.hg	2
ENSG00000177409	0.227516		SAMD9L	ENSG00000177409	sterile alpha motif domain containing 9-like [Source:HGNC Symbol;Acc:1349]	upregulated	ei-ex	1	1	E3.4_92774861		(+)AA:70(ENSP00000410062)->70(ENSP00000391387)			protein binding	-0.808393	cassette-exon|cassetteExon|exon-region-exclusion|exon-region-exclusion|retainedIntron	E3-3|E3-4	TC07001606.hg	5
ENSG00000156304	0.266531		SCAF4	ENSG00000156304	SR-related CTD-associated factor 4 [Source:HGNC Symbol;Acc:19304]	upregulated	ei-ex	1	1	E4.1_33076255		(-)AA:1132(ENSP00000402377)->1147(ENSP00000286835),(-)alt-coding	(+)CID_dom-IPR006569,(+)ENTH_VHS-IPR008942,(-)CID_dom-IPR006569,(-)DOMAIN-CID,(-)ENTH_VHS-IPR008942,(-)MOD_RES-N6-acetyllysine	(direct)ENTH_VHS-IPR008942, (direct)DOMAIN-CID-UniProt, (direct)CID_dom-IPR006569	nucleotide binding // nucleic acid binding // RNA binding // nucleus	0.220855		E4-1	TC21000391.hg	2
ENSG00000085365	0.248295		SCAMP1	ENSG00000085365	secretory carrier membrane protein 1 [Source:HGNC Symbol;Acc:10563]	upregulated	ei-ex	1	1	E10.1		(+)AA:77(ENST00000506858-PEP)->197(ENST00000320280-PEP),(+)alt-C-terminus,(+)alt-N-terminus	(+)TOPO_DOM-Cytoplasmic,(+)TOPO_DOM-Lumenal,(+)TRANSMEM-Helical;		miR-targeted genes in muscle cell - TarBase:WP2005 // miR-targeted genes in lymphocytes - TarBase:WP2004	-0.0731706	cassette-exon	E10-1	TC05000384.hg	3
ENSG00000151466	0.255867		SCLT1	ENSG00000151466	sodium channel and clathrin linker 1 [Source:HGNC Symbol;Acc:26406]	upregulated	ei-ex	1	1	E23.1_129812308|E12.1		(-)AA:307(ENSP00000401539)->352(ENST00000506233-PEP),(-)alt-N-terminus,(-)retained_intron		(direct)COILED-UniProt	clustering of voltage-gated sodium channels // protein C-terminus binding // sodium channel regulator activity // clathrin binding // cytoplasm // centrosome // intermediate filament cytoskeleton // clathrin complex	-0.2901	alt-C-term	E23-1	TC04001540.hg	3
ENSG00000010803	0.203389		SCMH1	ENSG00000010803	sex comb on midleg homolog 1 (Drosophila) [Source:HGNC Symbol;Acc:19003]	upregulated	ei-ex	1	1	E5.1		(-)AA:599(ENSP00000361676)->660(ENSP00000318094),(-)alt-N-terminus	(-)HELIX,(-)Mbt-IPR004092,(-)REPEAT-MBT 1,(-)STRAND	(direct)REPEAT-MBT 1-UniProt, (direct)Mbt-IPR004092	chromatin remodeling // transcription, DNA-dependent // regulation of transcription, DNA-dependent // spermatogenesis // anatomical structure morphogenesis // anterior/posterior pattern formation // gene silencing // negative regulation of transcription, DNA-dependent // DNA binding // sequence-specific DNA binding transcription factor activity // protein binding // nucleus // chromocenter	-0.00708667		E5-1|E9-1	TC01002564.hg	2
ENSG00000054282	0.221424		SDCCAG8	ENSG00000054282	serologically defined colon cancer antigen 8 [Source:HGNC Symbol;Acc:10671]	downregulated	ei-ex	1	1		E19.1|E20.1	(-)AA:414(ENSP00000410200)->568(ENSP00000341260),(-)alt-N-terminus	(-)COILED,(-)COMPBIAS-Gln-rich,(-)REGION-Mediates interaction with OFD1,(-)REGION-Sufficient for homodimerization	(direct)COMPBIAS-Gln-rich-UniProt, (direct)COILED-UniProt, (direct)REGION-Mediates interaction with OFD1-UniProt, (direct)REGION-Sufficient for homodimerization-UniProt	G2/M transition of mitotic cell cycle // mitotic cell cycle // establishment of cell polarity // tube formation // protein binding // centrosome // centriole // cytosol // cell-cell junction	0.00267167	cassette-exon|cassetteExon	E19-1	TC01001981.hg	5
ENSG00000143252	0.202573		SDHC	ENSG00000143252	succinate dehydrogenase complex, subunit C, integral membrane protein, 15kDa [Source:HGNC Symbol;Acc:10682]	downregulated	ei-ex	1	1		E4.3|E5.1	(+)AA:67(ENSP00000423929)->135(ENSP00000390558),(+)nonsense_mediated_decay,(-)truncated	(+)METAL-Iron (heme axial ligand); shared with SDHD,(+)Succ_DH_Fumarate_Rdtase_TM-su-IPR000701,(+)Succ_DH_cytb556-IPR014314,(+)Succ_DH_cytb560-IPR014361,(+)TOPO_DOM-Mitochondrial intermembrane,(+)TOPO_DOM-Mitochondrial matrix,(+)TRANSMEM-Helical;,(-)TRANSIT-Mitochondrion	(indirect)TOPO_DOM-Mitochondrial matrix-UniProt	TCA Cycle:WP78 // Electron Transport Chain:WP111 // tricarboxylic acid cycle // aerobic respiration // respiratory electron transport chain // small molecule metabolic process // oxidation-reduction process // succinate dehydrogenase activity // electron carrier activity // oxidoreductase activity, acting on the CH-CH group of donors // heme binding // metal ion binding // mitochondrion // mitoch…	0.288643	cassette-exon|cassetteExon	E4-2|E4-3	TC01001385.hg	5
ENSG00000176986	0.314177		SEC24C	ENSG00000176986	SEC24 family, member C (S. cerevisiae) [Source:HGNC Symbol;Acc:10705]	upregulated	ei-ex	2	1	E9.1|E10.1		(+)AA:258(ENSP00000446333)->975(ENSP00000402913),(+)AA:342(ENSP00000446174)->975(ENSP00000402913),(+)alt-N-terminus,(-)truncated	(+)Gelsolin_dom-IPR007123,(+)HELIX,(+)MOD_RES-Phosphothreonine,(+)REGION-Zinc finger-like,(+)STRAND,(+)Sec23/24_helical_dom-IPR006900,(+)Sec23/24_trunk_dom-IPR006896,(+)Sec23_24_beta_S-IPR012990,(+)TURN,(+)Znf_Sec23_Sec24-IPR006895,(-)Znf_Sec23_Sec24-IPR006895	(indirect)Znf_Sec23_Sec24-IPR006895	SREBP signalling:WP1982 // antigen processing and presentation of peptide antigen via MHC class I // intracellular protein transport // ER to Golgi vesicle-mediated transport // cellular membrane organization // protein N-linked glycosylation via asparagine // antigen processing and presentation of exogenous peptide antigen via MHC class II // post-translational protein modification // cellular p…	0.320081	cassette-exon|cassetteExon	E10-1	TC10000468.hg	5
ENSG00000008952	0.221155		SEC62	ENSG00000008952	SEC62 homolog (S. cerevisiae) [Source:HGNC Symbol;Acc:11846]	upregulated	ei-ex	1	1	E5.1|E6.1		(-)AA:85(ENSP00000419319)->167(ENST00000481435-PEP),(-)alt-C-terminus,(-)alt-N-terminus,(-)nonsense_mediated_decay,(-)retained_intron	(-)MOD_RES-Phosphoserine,(-)MOD_RES-Phosphothreonine	(indirect)TOPO_DOM-Cytoplasmic-UniProt	miR-targeted genes in muscle cell - TarBase:WP2005 // miR-targeted genes in lymphocytes - TarBase:WP2004 // miR-targeted genes in epithelium - TarBase:WP2002 // cotranslational protein targeting to membrane // transport // protein transport // transmembrane transport // receptor activity // ATP binding // protein transporter activity // ATPase activity, coupled to transmembrane movement of substa…	-0.0879267	cassette-exon	E5-1	TC03000909.hg	3
ENSG00000168066	0.206009		SF1	ENSG00000168066	splicing factor 1 [Source:HGNC Symbol;Acc:12950]	upregulated	ei-ex	2	2	E13.3_64534734	E12.3	(+)AA:200(ENSP00000391198)->292(ENSP00000419062),(+)alt-C-terminus,(+)alt-N-terminus	(+)Znf_CCHC-IPR001878	(direct)COMPBIAS-Pro-rich-UniProt	spliceosome assembly // nuclear mRNA 3'-splice site recognition // nuclear mRNA splicing, via spliceosome // transcription, DNA-dependent // regulation of transcription, DNA-dependent // cell cycle process // male sex determination // Leydig cell differentiation // regulation of steroid biosynthetic process // nucleic acid binding // transcription corepressor activity // RNA binding // zinc ion b…	0.91917	alt-3'	E12-3|E13-1|E13-3	TC11001911.hg	3
ENSG00000087266	0.239467		SH3BP2	ENSG00000087266	SH3-domain binding protein 2 [Source:HGNC Symbol;Acc:10825]	downregulated	ei-ex	2	1		E22.1	(+)AA:190(ENSP00000426818)->536(ENST00000515802-PEP),(+)alt-C-terminus,(+)alt-N-terminus,(+)nonsense_mediated_decay,(+)retained_intron,(-)AA:190(ENSP00000426818)->536(ENST00000515802-PEP),(-)alt-C-terminus,(-)alt-N-terminus,(-)nonsense_mediated_decay,(-)retained_intron	(+)COMPBIAS-Poly-Pro,(+)DOMAIN-SH2,(+)HELIX,(+)MOD_RES-Phosphoserine,(+)MOD_RES-Phosphotyrosine; by SYK,(+)MOTIF-SH3-binding,(+)SH2-IPR000980,(+)STRAND,(+)TURN,(-)COMPBIAS-Poly-Pro,(-)DOMAIN-SH2,(-)HELIX,(-)MOD_RES-Phosphoserine,(-)MOD_RES-Phosphotyrosine; by SYK,(-)MOTIF-SH3-binding,(-)SH2-IPR000980,(-)STRAND,(-)TURN	(direct)HELIX-UniProt, (direct)SH2-IPR000980, (direct)DOMAIN-SH2-UniProt	B Cell Receptor Signaling Pathway:WP23 // signal transduction // SH3/SH2 adaptor activity // protein binding // phospholipid binding // SH3 domain binding	0.242635	alt-3'	E22-1	TC04000038.hg	3
ENSG00000268430	0.239419		SHANK2	ENSG00000268430	Homo sapiens SH3 and multiple ankyrin repeat domains 2 (SHANK2), transcript variant 1, mRNA. [Source:RefSeq mRNA;Acc:NM_012309]	upregulated	ei-ex	1	1	I14.3_70515764		(+)AA:1390(ENSP00000474800)->1397(ENSP00000471204),(+)alt-coding			protein binding // ionotropic glutamate receptor binding // photoreceptor outer segment // photoreceptor inner segment // neurofilament // ionotropic glutamate receptor complex // dendritic spine // postsynaptic membrane	-0.0383713			TC11002030.hg	2
ENSG00000149577	0.282736		SIDT2	ENSG00000149577	SID1 transmembrane family, member 2 [Source:HGNC Symbol;Acc:24272]	upregulated	ei-ex	2	1	E10.1		(+)AA:829(ENSP00000399635)->832(ENSP00000314023),(+)alt-coding	(+)MOD_RES-Phosphoserine,(+)TOPO_DOM-Cytoplasmic	(indirect)TOPO_DOM-Cytoplasmic-UniProt	RNA interference // dsRNA transport // RNA transmembrane transporter activity // lysosomal membrane // integral to membrane	0.401963	cassette-exon|cassetteExon	E10-1	TC11001048.hg	5
ENSG00000127511	0.250486		SIN3B	ENSG00000127511	SIN3 transcription regulator homolog B (yeast) [Source:HGNC Symbol;Acc:19354]	downregulated	ei-ex	1	1		E10.1	(-)AA:1130(ENSP00000248054)->1162(ENSP00000369131),(-)alt-coding	(+)HDAC_interact-IPR013194,(-)HDAC_interact-IPR013194,(-)REGION-Interaction with NCOR1,(-)REGION-Interaction with SUDS3 and HDAC1	(direct)HDAC_interact-IPR013194, (direct)REGION-Interaction with SUDS3 and HDAC1-UniProt, (direct)REGION-Interaction with NCOR1-UniProt	transcription, DNA-dependent // regulation of transcription, DNA-dependent // skeletal muscle tissue development // cellular lipid metabolic process // small molecule metabolic process // negative regulation of transcription, DNA-dependent // cardiac muscle tissue development // chromatin binding // transcription corepressor activity // protein binding // X chromosome // Y chromosome // XY body /…	-0.0447222	alt-3'|cassetteExon	E10-1	TC19000325.hg	5
ENSG00000160785	0.22053		SLC25A44	ENSG00000160785	solute carrier family 25, member 44 [Source:HGNC Symbol;Acc:29036]	upregulated	ei-ex	1	1	E3.1|E2.17				(indirect)REPEAT-Solcar 2-UniProt	transmembrane transport // mitochondrion // mitochondrial inner membrane // integral to membrane	0.35137	alt-3'|cassette-exon|altThreePrime|cassetteExon	E3-1	TC01001315.hg	5
ENSG00000152683	0.248042		SLC30A6	ENSG00000152683	solute carrier family 30 (zinc transporter), member 6 [Source:HGNC Symbol;Acc:19305]	downregulated	ei-ex	3	2		E11.3,E7.1	(+)AA:122(ENSP00000396634)->179(ENSP00000393946),(+)AA:31(ENSP00000388013)->264(ENSP00000349563),(+)alt-C-terminus,(+)alt-N-terminus,(+)nonsense_mediated_decay,(-)AA:31(ENSP00000388013)->264(ENSP00000349563),(-)alt-C-terminus,(-)alt-N-terminus,(-)nonsense_mediated_decay	(+)Cation_efflux-IPR002524,(+)TOPO_DOM-Cytoplasmic,(+)TOPO_DOM-Extracellular,(+)TRANSMEM-Helical;,(-)Cation_efflux-IPR002524,(-)TOPO_DOM-Cytoplasmic,(-)TOPO_DOM-Extracellular,(-)TRANSMEM-Helical;	(indirect)TOPO_DOM-Cytoplasmic-UniProt, (direct)TOPO_DOM-Cytoplasmic-UniProt, (direct)Cation_efflux-IPR002524	cation transport // zinc ion transport // Golgi to endosome transport // cellular protein metabolic process // transmembrane transport // zinc ion transmembrane transport // zinc ion transmembrane transporter activity // cation transmembrane transporter activity // Golgi membrane // mitochondrion // Golgi apparatus // integral to membrane	0.622989	cassette-exon, cassette-exon|cassetteExon	E11-3|E7-1	TC02000211.hg	5
ENSG00000205060	0.226042		SLC35B4	ENSG00000205060	solute carrier family 35, member B4 [Source:HGNC Symbol;Acc:20584]	upregulated	ei-ex	2	2	E9.1	E11.2_133979729			(direct)TRANSMEM-Helical-UniProt, (direct)DUF250-IPR004853, (direct)UAA-IPR013657	regulation of gluconeogenesis // carbohydrate transport // UDP-N-acetylglucosamine transport // UDP-xylose transport // transmembrane transport // UDP-N-acetylglucosamine transmembrane transporter activity // UDP-xylose transmembrane transporter activity // Golgi membrane // Golgi apparatus // integral to membrane	0.893677	alt-3'	E11-1|E11-2|E9-1	TC07001880.hg	3
ENSG00000197818	0.333509		SLC9A8	ENSG00000197818	solute carrier family 9, subfamily A (NHE8, cation proton antiporter 8), member 8 [Source:HGNC Symbol;Acc:20728]	downregulated	ei-ex	1	1		E6.2|E7.1	(-)AA:581(ENSP00000354966)->597(ENSP00000416418),(-)alt-coding	(+)Cation/H_exchanger-IPR006153,(+)NaH_exchanger-IPR004709,(-)Cation/H_exchanger-IPR006153,(-)NaH_exchanger-IPR004709	(direct)NaH_exchanger-IPR004709, (direct)Cation/H_exchanger-IPR006153	ion transport // cation transport // potassium ion transport // sodium ion transport // regulation of pH // regulation of intracellular pH // transmembrane transport // solute // sodium // potassium // Golgi membrane // Golgi apparatus // integral to membrane	0.409599	alt-3'|cassette-exon|altThreePrime|cassetteExon	E7-1	TC20000391.hg	5
ENSG00000137776	0.204108		SLTM	ENSG00000137776	SAFB-like, transcription modulator [Source:HGNC Symbol;Acc:20709]	downregulated	ei-ex	1	1		E10.2_59191067	(-)AA:38(ENST00000557950-PEP)->205(ENSP00000452945),(-)alt-C-terminus,(-)alt-N-terminus,(-)nonsense_mediated_decay	(-)MOD_RES-Phosphoserine		transcription, DNA-dependent // regulation of transcription, DNA-dependent // apoptosis // nucleotide binding // nucleic acid binding // RNA binding // nucleus	-0.586235	alt-C-term|exon-region-exclusion|exon-region-exclusion|retainedIntron	E10-1|E10-2	TC15001491.hg	5
ENSG00000113810	0.309344		SMC4	ENSG00000113810	structural maintenance of chromosomes 4 [Source:HGNC Symbol;Acc:14013]	downregulated	ei-ex	3	3	E5.1,E6.1|E5.1	E4.2|E6.4	(+)AA:90(ENST00000472282-PEP)->94(ENST00000497984-PEP),(+)alt-C-terminus,(-)AA:90(ENST00000472282-PEP)->94(ENST00000497984-PEP),(-)alt-C-terminus		(direct)P-loop_NTPase-IPR027417, (direct)RecF/RecN/SMC-IPR003395	mitotic sister chromatid segregation // M phase of mitotic cell cycle // mitotic prometaphase // mitotic cell cycle // DNA repair // DNA recombination // chemotaxis // sister chromatid cohesion // mitotic chromosome condensation // signal transduction // meiotic chromosome condensation // chromosome condensation // meiotic chromosome segregation // chromosome organization // cell division // kine…	-0.541473	cassette-exon, cassette-exon|cassetteExon	E4-2|E5-1	TC03000873.hg	5
ENSG00000200851	0.356198		SNORD27	ENSG00000200851	small nucleolar RNA, C/D box 27 [Source:HGNC Symbol;Acc:10149]	upregulated	ei-ex	2	2	E0.22	E1.20_62621552					0.29107		U1.20_62621552-U0.23|U1.9_62622039-U0.22	TC11001884.hg	2
ENSG00000135317	0.241626		SNX14	ENSG00000135317	sorting nexin 14 [Source:HGNC Symbol;Acc:14977]	downregulated	ei-ex	2	2		E18.1,E20.2_86246658			(indirect)Regulat_G_prot_signal_superfam-IPR016137, (indirect)Regulat_G_prot_signal-IPR000342	cell communication // protein transport // protein binding // phosphatidylinositol binding // integral to membrane	0.0422867	cassette-exon	E18-1|E20-1|E20-2	TC06004053.hg	3
ENSG00000079263	0.251767		SP140	ENSG00000079263	SP140 nuclear body protein [Source:HGNC Symbol;Acc:17133]	upregulated	ei-ex	3	3	E9.2,E9.2|E11.1	E10.1	(+)AA:189(BAG62868.1)->807(ENSP00000342096),(+)AA:753(ENSP00000393618)->807(ENSP00000342096),(+)alt-coding,(-)truncated	(+)Bromodomain-IPR001487,(+)COMPBIAS-Poly-Tyr,(+)DOMAIN-Bromo,(+)DOMAIN-SAND,(+)MOTIF-Nuclear localization signal,(+)SAND_dom-IPR000770,(+)SAND_dom-like-IPR010919,(+)ZN_FING-PHD-type,(+)Znf_FYVE_PHD-IPR011011,(+)Znf_PHD-IPR001965,(+)Znf_PHD-finger-IPR019787		regulation of transcription, DNA-dependent // defense response // DNA binding // sequence-specific DNA binding transcription factor activity // protein binding // zinc ion binding // nucleus // nuclear envelope // nucleoplasm // nucleolus // cytoplasm	-0.458426	alt-5'|cassette-exon|altFivePrime|cassette-exon, cassetteExon|mutually-exclusive-exon	E10-1|E9-1|E9-2	TC02005009.hg	5
ENSG00000185404	0.223286		SP140L	ENSG00000185404	SP140 nuclear body protein-like [Source:HGNC Symbol;Acc:25105]	downregulated	ei-ex	3	3	E3.1	E12.1,E13.1	(+)AA:114(ENST00000496870-PEP)->403(ENSP00000379811),(+)AA:403(ENSP00000379811)->438(ENSP00000243810),(+)alt-C-terminus,(+)alt-N-terminus,(+)alt-coding,(+)retained_intron,(-)AA:403(ENSP00000379811)->438(ENSP00000243810),(-)alt-coding	(+)DOMAIN-HSR,(+)DOMAIN-SAND,(+)SAND_dom-IPR000770,(+)SAND_dom-like-IPR010919,(+)Sp100-IPR004865,(-)DOMAIN-SAND,(-)SAND_dom-IPR000770,(-)SAND_dom-like-IPR010919	(direct)SAND_dom-like-IPR010919, (direct)SAND_dom-IPR000770, (direct)DOMAIN-SAND-UniProt	DNA binding // protein binding // zinc ion binding // nucleus	-0.324833	alt-N-term, alt-N-term|cassette-exon|cassetteExon	E12-1|E13-1|E3-1	TC02005010.hg	5
ENSG00000042317	0.213212		SPATA7	ENSG00000042317	spermatogenesis associated 7 [Source:HGNC Symbol;Acc:20423]	upregulated	ei-ex	1	1	E11.1		(+)truncated,(-)AA:46(ENSP00000451663)->228(ENSP00000450606),(-)nonsense_mediated_decay			visual perception // response to stimulus	-0.00859667	cassetteExon|mutually-exclusive-exon	E11-1	TC14000532.hg	5
ENSG00000123352	0.236847		SPATS2	ENSG00000123352	spermatogenesis associated, serine-rich 2 [Source:HGNC Symbol;Acc:18650]	upregulated	ei-ex	3	2	E18.1,E6.1		(+)AA:295(ENSP00000448459)->545(ENSP00000447947),(+)AA:8(ENSP00000447131)->34(ENSP00000447526),(+)alt-C-terminus,(+)microRNA-target(hsa-miR-182:miRanda),(+)microRNA-target(hsa-miR-378:miRanda,hsa-miR-590-3p:miRanda),(+)nonsense_mediated_decay,(-)AA:75(ENSP00000449615)->90(ENST00000548388-PEP),(-)alt-C-terminus,(-)alt-N-terminus,(-)retained_intron,(-)truncated	(+)COMPBIAS-Ser-rich,(+)DUF1387-IPR009816,(+)MOD_RES-Phosphoserine	(indirect)DUF1387-IPR009816	protein binding // cytoplasm	-0.80985	cassette-exon|cassetteExon, cassetteExon|mutually-exclusive-exon	E18-1|E6-1	TC12000372.hg	5
ENSG00000040275	0.316862		SPDL1	ENSG00000040275	spindle apparatus coiled-coil protein 1 [Source:HGNC Symbol;Acc:26010]	upregulated	ei-ex	4	3	E2.2,E3.1,E4.1		(+)AA:86(ENSP00000421598)->88(ENSP00000423687),(+)alt-C-terminus,(-)AA:86(ENSP00000421598)->88(ENSP00000423687),(-)alt-C-terminus			M phase of mitotic cell cycle // mitotic anaphase // establishment of mitotic spindle orientation // mitotic prometaphase // mitotic cell cycle // mitotic metaphase plate congression // protein localization to kinetochore // cell division // protein binding // kinetochore binding // spindle pole // condensed chromosome outer kinetochore // nucleus // microtubule organizing center // cytosol	-0.427306	alt-C-term, alt-C-term|alt-3'|cassette-exon, mutually-exclusive-exon	E2-2|E3-1|E4-1	TC05000928.hg	3
ENSG00000145545	0.23276		SRD5A1	ENSG00000145545	steroid-5-alpha-reductase, alpha polypeptide 1 (3-oxo-5 alpha-steroid delta 4-dehydrogenase alpha 1) [Source:HGNC Symbol;Acc:11284]	upregulated	ei-ex	1	1	E4.1		(-)AA:180(ENST00000504286-PEP)->259(ENSP00000274192),(-)alt-C-terminus	(-)3-oxo-5-alpha-steroid_4-DH-IPR016636,(-)3-oxo-5_a-steroid_4-DH_C-IPR001104,(-)DUF1295-IPR010721,(-)TRANSMEM-Helical;		lipid metabolic process // androgen biosynthetic process // sex determination // sex differentiation // steroid metabolic process // cell differentiation // small molecule metabolic process // oxidation-reduction process // 3-oxo-5-alpha-steroid 4-dehydrogenase activity // electron carrier activity // oxidoreductase activity, acting on the CH-CH group of donors // cholestenone 5-alpha-reductase a…	0.242997	cassette-exon	E4-1	TC05000044.hg	3
ENSG00000128039	0.201735		SRD5A3	ENSG00000128039	steroid 5 alpha-reductase 3 [Source:HGNC Symbol;Acc:25812]	upregulated	ei-ex	1	1	E4.1|E5.1		(+)AA:182(ENSP00000424714)->318(ENSP00000264228),(+)alt-N-terminus	(+)3-oxo-5_a-steroid_4-DH_C-IPR001104,(+)TOPO_DOM-Cytoplasmic,(+)TOPO_DOM-Lumenal,(+)TRANSMEM-Helical;	(direct)TOPO_DOM-Cytoplasmic-UniProt	protein glycosylation // dolichol-linked oligosaccharide biosynthetic process // lipid metabolic process // androgen biosynthetic process // steroid metabolic process // polyprenol catabolic process // dolichol metabolic process // small molecule metabolic process // 3-oxo-5-alpha-steroid 4-dehydrogenase activity // oxidoreductase activity, acting on the CH-CH group of donors // oxidoreductase ac…	0.731123	cassette-exon	E4-1	TC04000319.hg	3
ENSG00000087087	0.220987		SRRT	ENSG00000087087	serrate RNA effector molecule homolog (Arabidopsis) [Source:HGNC Symbol;Acc:24101]	upregulated	ei-ex	1	1	E8.2		(+)AA:499(ENSP00000410588)->876(ENSP00000314491),(+)alt-N-terminus	(+)Arsenite-R_2-IPR007042,(+)COMPBIAS-Arg-rich,(+)COMPBIAS-Glu-rich,(+)COMPBIAS-Pro-rich,(+)DUF3546-IPR021933,(+)MOD_RES-Phosphoserine,(+)MOD_RES-Phosphotyrosine,(-)Arsenite-R_2-IPR007042	(direct)DUF3546-IPR021933	transcription, DNA-dependent // regulation of transcription, DNA-dependent // cell proliferation // primary microRNA processing // response to arsenic-containing substance // DNA binding // protein binding // nucleoplasm // cytoplasm	-0.212345	cassette-exon	E8-2	TC07000636.hg	3
ENSG00000116754	0.220669		SRSF11	ENSG00000116754	serine/arginine-rich splicing factor 11 [Source:HGNC Symbol;Acc:10782]	upregulated	ei-ex	1	1	E4.1|E3.1		(+)AA:44(ENST00000481648-PEP)->80(ENSP00000474149),(+)alt-C-terminus,(+)alt-N-terminus,(+)nonsense_mediated_decay	(+)COMPBIAS-Poly-Gly	(indirect)DOMAIN-RRM-UniProt	nuclear mRNA splicing, via spliceosome // transcription from RNA polymerase II promoter // termination of RNA polymerase II transcription // mRNA processing // mRNA export from nucleus // RNA splicing // gene expression // mRNA 3'-end processing // nucleotide binding // nucleic acid binding // RNA binding // protein binding // nucleus // nucleoplasm	-0.02624	alt-3'	E4-1	TC01000755.hg	3
ENSG00000266173	0.277724		STRADA	ENSG00000266173	STE20-related kinase adaptor alpha [Source:HGNC Symbol;Acc:30172]	upregulated	ei-ex	2	2	E3.2	E8.1|E8.2_61791484	(-)AA:394(BAC11197.1)->431(AAG48269.1),(-)alt-N-terminus	(+)DOMAIN-Protein kinase,(+)HELIX,(+)Kinase-like_dom-IPR011009,(+)Prot_kinase_cat_dom-IPR000719,(+)Ser/Thr_dual-sp_kinase_dom-IPR002290,(+)Tyr_kinase_cat_dom-IPR020635		Integrated Pancreatic Cancer Pathway:WP2377 // AMPK Signaling:WP1403 // protein phosphorylation // protein export from nucleus // cell cycle arrest // insulin receptor signaling pathway // activation of protein kinase activity // protein kinase activity // protein serine/threonine kinase activity // protein tyrosine kinase activity // protein binding // ATP binding // transferase activity, transf…	0.437189	alt-N-term|alt-N-term|alt-5', cassette-exon	E3-2|E3-3|E8-1|E8-2	TC17001784.hg	3
ENSG00000102710	0.211087		SUPT20H	ENSG00000102710	suppressor of Ty 20 homolog (S. cerevisiae) [Source:HGNC Symbol;Acc:20596]	upregulated	ei-ex	1	1	E23.3_3759647		(+)AA:522(ENSP00000473592)->811(ENSP00000417510),(+)alt-C-terminus,(+)alt-N-terminus,(+)nonsense_mediated_decay	(-)COMPBIAS-Gln-rich		Arrhythmogenic right ventricular cardiomyopathy (ARVC):KEGG-hsa05412:WP2118 // Striated Muscle Contraction:WP383 // autophagy // gastrulation // transcription cofactor activity // protein binding // SAGA complex // SAGA-type complex	-0.273275	alt-3'|altThreePrime|bleedingExon	E23-2|E23-3	TC13000571.hg	5
ENSG00000153157	0.210349		SYCP2L	ENSG00000153157	synaptonemal complex protein 2-like [Source:HGNC Symbol;Acc:21537]	upregulated	ei-ex	2	1	E18.1		(+)AA:291(ENSP00000340320)->812(ENSP00000283141),(+)nonsense_mediated_decay,(+)truncated,(-)AA:291(ENSP00000340320)->812(ENSP00000283141),(-)nonsense_mediated_decay,(-)truncated			nucleus	-0.361265	cassette-exon	E18-1	TC06004048.hg	3
ENSG00000006114	0.200155		SYNRG	ENSG00000006114	synergin, gamma [Source:HGNC Symbol;Acc:557]	upregulated	ei-ex	1	1	E23.1		(-)AA:1302(ENSP00000005279)->1314(ENSP00000343610),(-)alt-coding			intracellular protein transport // endocytosis // calcium ion binding // protein binding // cytoplasm // Golgi apparatus // AP-1 adaptor complex	-0.0599445		E23-1	TC17001408.hg	2
ENSG00000059588	0.20004		TARBP1	ENSG00000059588	TAR (HIV-1) RNA binding protein 1 [Source:HGNC Symbol;Acc:11568]	upregulated	ei-ex	1	1	E26.2		(-)AA:16(ENST00000496673-PEP)->67(ENST00000462259-PEP),(-)alt-C-terminus,(-)alt-N-terminus			regulation of transcription from RNA polymerase II promoter // RNA processing // RNA binding // binding // RNA methyltransferase activity // nucleus	0.0643167		E26-2	TC01003983.hg	2
ENSG00000143374	0.209098		TARS2	ENSG00000143374	threonyl-tRNA synthetase 2, mitochondrial (putative) [Source:HGNC Symbol;Acc:30740]	upregulated	ei-ex	1	1	E5.2		(-)AA:199(ENST00000480070-PEP)->443(AAR23527.1),(-)alt-C-terminus,(-)alt-N-terminus	(-)Thr-tRNA-ligase_IIa-IPR002320,(-)aa-tRNA-synt_IIb_cons-dom-IPR002314,(-)aa-tRNA-synth_II-IPR006195	(direct)Thr-tRNA-ligase_IIa-IPR002320, (direct)Thr/Ala-tRNA-synth_IIc_edit-IPR018163, (direct)aa-tRNA-synt_IIb_cons-dom-IPR002314, (direct)aa-tRNA-synth_II-IPR006195	tRNA aminoacylation for protein translation // threonyl-tRNA aminoacylation // gene expression // tRNA aminoacylation // mitochondrial threonyl-tRNA aminoacylation // nucleotide binding // molecular_function // aminoacyl-tRNA ligase activity // threonine-tRNA ligase activity // ATP binding // ligase activity, forming aminoacyl-tRNA and related compounds // cellular_component // cytoplasm // mitoc…	0.268574	cassetteExon|mutually-exclusive-exon	E5-2	TC01001187.hg	5
ENSG00000213977	0.230447		TAX1BP3	ENSG00000213977	Tax1 (human T-cell leukemia virus type I) binding protein 3 [Source:HGNC Symbol;Acc:30684]	upregulated	ei-ex	2	2	E2.1	E4.1_3567195	(+)AA:124(BAJ20997.1)->124(ENSP00000225525),(-)AA:124(BAJ20997.1)->124(ENSP00000225525)		(direct)STRAND-UniProt, (direct)DOMAIN-PDZ-UniProt, (direct)PDZ-IPR001478, (direct)Tax1-binding_p3-IPR017268	Rho protein signal transduction // negative regulation of cell proliferation // Wnt receptor signaling pathway // regulation of Wnt receptor signaling pathway // negative regulation of Wnt receptor signaling pathway // activation of Cdc42 GTPase activity // negative regulation of protein localization at cell surface // protein binding // beta-catenin binding // protein C-terminus binding // nucle…	0.48788	bleedingExon	E2-1|E4-1	TC17002884.hg	4
ENSG00000113649	0.207561		TCERG1	ENSG00000113649	transcription elongation regulator 1 [Source:HGNC Symbol;Acc:15630]	downregulated	ei-ex	1	1		E14.1	(+)AA:182(ENST00000515203-PEP)->803(AK126455-PEP),(+)alt-C-terminus,(+)alt-N-terminus	(+)COILED,(+)COMPBIAS-Ala/Gln-rich,(+)COMPBIAS-Pro-rich,(+)COMPBIAS-Thr-rich,(+)DOMAIN-FF 2,(+)DOMAIN-WW 1,(+)DOMAIN-WW 3,(+)FF_domain-IPR002713,(+)HELIX,(+)MOTIF-Nuclear localization signal,(+)STRAND,(+)TURN,(+)WW_dom-IPR001202	(indirect)COILED--UniProt, (indirect)MOTIF-Nuclear localization signal-UniProt	negative regulation of transcription from RNA polymerase II promoter // transcription from RNA polymerase II promoter // RNA polymerase II repressing transcription factor binding // RNA polymerase II transcription corepressor activity // transcription coactivator activity // protein binding // proline-rich region binding // nucleus	-0.397351	cassette-exon	E14-1	TC05000799.hg	3
[truncated: 62 more rows]

## Sheet: U2AF2RIP_U2AF1vCtrl_ASExon
Ensembl	ASPIRE	symbol	description	exons1	exons2	regulation_call	event_call	probeset1	norm-p1	probeset2	norm-p2	fold1	fold2	adj-fold1	adj-fold2	transcript cluster ID	critical_up_exons	critical_down_exons	functional_prediction	uniprot-ens_feature_predictions	peptide_predictions	exp1	exp2	ens_overlapping_domains	constitutive_baseline_exp	permuted_aspire_p-value	permutation-values	permutation-false-positives	gene-expression-change	distal exon-region-ID	ExternalExonIDs	ExonRegionID	SplicingEvent	ExonAnnotationScore	large_splicing_diff	probeset locations
[truncated: 714 more rows]

[truncated: 3 more sheets: U2AF2RIP_SYNCRIPvCtrl_DEGenes, U2AF2RIP_SYNCRIPvCtrl_ASGene, U2AF2RIP_SYNCRIPvCtrl_ASExon]
